# Supplementary material for: Retrospective Side Effect Profiling of the Metastatic Melanoma Combination Therapy Ipilimumab-Nivolumab Using Adverse Event Data
Source: MDPI journal article supplement (doi:10.3390/diagnostics8040076), 2018-10-31
Supplement: s1 [file s1]

**Table 1:** To summarize further the profiles of the three sets (cohorts #6-#8) we compiled the union of the top twenty most frequent HLT MedDRA classes and of those that linked with the top twenty most frequent reactions, derived from Table 1 in the main text. Cases that had PRR≤1, p>=0.05, or that occurred in less than 1% of cohort AEs were excluded.

| Cohort                                                          | Ipilimumab and Nivolumab (#8) |                        |        | Ipilimumab (#6) |                         |        | Nivolumab (#7) |                          |        |
|-----------------------------------------------------------------|-------------------------------|------------------------|--------|-----------------|-------------------------|--------|----------------|--------------------------|--------|
| Reaction names (MedDRA)                                         | AEs                           | PRR (95%CI)            | p<0.05 | AEs             | PRR (95%CI)             | p<0.05 | AEs            | PRR (95%CI)              | p<0.05 |
| Hypopigmentation disorders                                      | 7                             | 51.2 (24.5 - 107.2)    | T      | 11              | 20.4 (11.3 - 36.8)      | T      | 20             | 113.1 (73.1 - 174.9)     | T      |
| • Leukoderma                                                    | 4                             | 707.4 (258.6 - 1935.4) | T      | -               | -                       | -      | 15             | 2439.2 (1383.4 - 4300.9) | T      |
| • Vitiligo                                                      | 3                             | 62 (20.0 - 192.3)      | T      | 10              | 52.7 (28.3 - 98.5)      | T      | 4              | 63.4 (23.8 - 169.2)      | T      |
| Muscle infections and inflammations                             | 5                             | 9.3 (3.9 - 22.3)       | T      | 8               | 3.8 (1.9 - 7.5)         | T      | 12             | 17.2 (9.8 - 30.1)        | T      |
| Febrile disorders                                               | 49                            | 3.2 (2.4 - 4.1)        | T      | 113             | 1.8 (1.5 - 2.2)         | T      | 21             | 1 (0.7 - 1.6)            | F      |
| • Pyrexia                                                       | 48                            | 3.6 (2.7 - 4.7)        | T      | 107             | 2 (1.7 - 2.4)           | T      | 21             | 1.2 (0.8 - 1.8)          | F      |
| Hepatic and hepatobiliary disorders nec                         | 13                            | 4.5 (2.6 - 7.7)        | T      | 20              | 1.8 (1.1 - 2.7)         | T      | 12             | 3.2 (1.8 - 5.6)          | T      |
| • Liver disorder                                                | 11                            | 6.3 (3.5 - 11.3)       | T      | 14              | 2 (1.2 - 3.4)           | T      | 9              | 3.9 (2.1 - 7.5)          | T      |
| Gastrointestinal and abdominal pains (excl oral and throat)     | 19                            | 1.1 (0.7 - 1.7)        | F      | 86              | 1.2 (1.0 - 1.5)         | T      | 12             | 0.5 (0.3 - 0.9)          | T      |
| • Abdominal pain                                                | 16                            | 1.8 (1.1 - 2.9)        | T      | 67              | 1.9 (1.5 - 2.4)         | T      | 10             | 0.9 (0.5 - 1.6)          | F      |
| Noninfectious myocarditis                                       | 11                            | 42.3 (23.5 - 76.1)     | T      | 6               | 5.8 (2.6 - 12.9)        | T      | 6              | 17.7 (8.0 - 39.2)        | T      |
| • Myocarditis                                                   | 11                            | 47.5 (26.4 - 85.5)     | T      | 6               | 6.5 (2.9 - 14.5)        | T      | 6              | 19.8 (8.9 - 44.1)        | T      |
| Adrenal cortical hypofunctions                                  | 14                            | 32.8 (19.5 - 55.2)     | T      | 47              | 28 (21.0 - 37.2)        | T      | 13             | 23.4 (13.6 - 40.1)       | T      |
| • Adrenal insufficiency                                         | 10                            | 39.6 (21.4 - 73.3)     | T      | 42              | 42.4 (31.3 - 57.3)      | T      | 9              | 27.3 (14.2 - 52.3)       | T      |
| Renal failure and impairment                                    | 18                            | 1.2 (0.8 - 2.0)        | F      | 67              | 1.2 (0.9 - 1.5)         | F      | 29             | 1.5 (1.1 - 2.2)          | T      |
| • Acute kidney injury                                           | 10                            | 4.8 (2.6 - 8.9)        | T      | 17              | 2.1 (1.3 - 3.3)         | T      | 11             | 4.1 (2.3 - 7.3)          | T      |
| • Renal failure                                                 | 6                             | 1.2 (0.5 - 2.6)        | F      | 15              | 0.7 (0.5 - 1.2)         | F      | 8              | 1.2 (0.6 - 2.4)          | F      |
| • Renal failure acute                                           | 1                             | 0.3 (0.04 - 1.8)       | F      | 30              | 2 (1.4 - 2.8)           | T      | -              | -                        | -      |
| Pruritus nec                                                    | 20                            | 1.1 (0.7 - 1.7)        | F      | 109             | 1.5 (1.3 - 1.8)         | T      | 33             | 1.4 (1.0 - 2.0)          | F      |
| • Pruritus                                                      | 19                            | 1.8 (1.1 - 2.8)        | T      | 79              | 1.9 (1.5 - 2.3)         | T      | 29             | 2.1 (1.5 - 3.0)          | T      |
| Diabetic complications nec                                      | 8                             | 8.7 (4.4 - 17.3)       | T      | 2               | 0.5 (0.1 - 2.2)         | F      | 9              | 7.5 (4.0 - 14.4)         | T      |
| • Diabetic ketoacidosis                                         | 8                             | 10.5 (5.3 - 20.9)      | T      | 2               | 0.7 (0.2 - 2.6)         | F      | 9              | 9 (4.7 - 17.3)           | T      |
| Intestinal ulcers and perforation nec                           | 4                             | 3.5 (1.3 - 9.2)        | T      | 72              | 15.8 (12.6 - 19.8)      | T      | 2              | 1.3 (0.3 - 5.3)          | F      |
| • Intestinal perforation                                        | 3                             | 6.7 (2.2 - 20.6)       | T      | 35              | 19.7 (14.2 - 27.5)      | T      | 1              | 1.7 (0.2 - 12.1)         | F      |
| Appetite disorders                                              | 14                            | 1.2 (0.7 - 2.0)        | F      | 80              | 1.7 (1.4 - 2.1)         | T      | 22             | 1.4 (0.9 - 2.1)          | F      |
| • Decreased appetite                                            | 11                            | 1.5 (0.8 - 2.6)        | F      | 74              | 2.5 (2.0 - 3.1)         | T      | 21             | 2.2 (1.4 - 3.3)          | T      |
| Diabetes mellitus (incl subtypes)                               | 20                            | 3.3 (2.1 - 5.0)        | T      | 12              | 0.5 (0.3 - 0.9)         | T      | 11             | 1.4 (0.8 - 2.5)          | F      |
| • Type 1 diabetes mellitus                                      | 11                            | 52.9 (29.4 - 95.3)     | T      | 2               | 2.4 (0.6 - 9.7)         | F      | 7              | 25.8 (12.3 - 54.0)       | T      |
| Tissue enzyme analyses nec                                      | 5                             | 2.3 (1.0 - 5.5)        | F      | 16              | 1.8 (1.1 - 3.0)         | T      | 19             | 6.7 (4.3 - 10.4)         | T      |
| Colitis (excl infective)                                        | 66                            | 25.4 (20.2 - 31.9)     | T      | 319             | 31.2 (28.1 - 34.6)      | T      | 20             | 5.9 (3.8 - 9.1)          | T      |
| • Colitis                                                       | 65                            | 60.9 (48.3 - 76.8)     | T      | 299             | 72.1 (64.7 - 80.3)      | T      | 18             | 12.9 (8.2 - 20.4)        | T      |
| Infusion site reactions                                         | 3                             | 1.2 (0.4 - 3.6)        | F      | 22              | 2.2 (1.4 - 3.3)         | T      | 11             | 3.3 (1.8 - 5.9)          | T      |
| • Infusion related reaction                                     | 3                             | 1.7 (0.6 - 5.3)        | F      | 18              | 2.6 (1.7 - 4.1)         | T      | 10             | 4.4 (2.4 - 8.2)          | T      |
| Metabolic disorders nec                                         | 49                            | 14.7 (11.3 - 19.3)     | T      | 82              | 6.2 (5.0 - 7.7)         | T      | 57             | 13.2 (10.2 - 16.9)       | T      |
| • Hyperthyroidism                                               | 20                            | 43.8 (28.4 - 67.5)     | T      | 16              | 8.8 (5.4 - 14.4)        | T      | 8              | 13.4 (6.7 - 26.7)        | T      |
| • Hypothyroidism                                                | 20                            | 18.4 (11.9 - 28.3)     | T      | 34              | 7.9 (5.6 - 11.0)        | T      | 42             | 29.6 (22.0 - 39.8)       | T      |
| Diarrhoea (excl infective)                                      | 67                            | 3.3 (2.6 - 4.1)        | T      | 399             | 4.9 (4.5 - 5.4)         | T      | 38             | 1.4 (1.0 - 1.9)          | T      |
| • Diarrhoea                                                     | 67                            | 3.3 (2.6 - 4.2)        | T      | 388             | 4.8 (4.4 - 5.3)         | T      | 38             | 1.4 (1.1 - 2.0)          | T      |
| Hypothalamic and pituitary disorders nec                        | 27                            | 50.4 (34.8 - 73.0)     | T      | 150             | 72 (61.5 - 84.3)        | T      | 10             | 14.3 (7.7 - 26.4)        | T      |
| • Hypophysitis                                                  | 24                            | 621.1 (414.8 - 930.0)  | T      | 125             | 1051.1 (860.0 - 1284.8) | T      | 6              | 114.4 (51.3 - 255.3)     | T      |
| Arthropathies nec                                               | 13                            | 2.7 (1.6 - 4.6)        | T      | 9               | 0.5 (0.2 - 0.9)         | T      | 7              | 1.1 (0.5 - 2.3)          | F      |
| • Arthritis                                                     | 9                             | 3.3 (1.7 - 6.3)        | T      | 7               | 0.7 (0.3 - 1.4)         | F      | 4              | 1.1 (0.4 - 3.0)          | F      |
| Pituitary analyses anterior                                     | 9                             | 11.6 (6.1 - 22.3)      | T      | 21              | 6.9 (4.5 - 10.5)        | T      | 12             | 12 (6.8 - 20.9)          | T      |
| Gastrointestinal inflammatory disorders nec                     | 15                            | 4.8 (2.9 - 7.9)        | T      | 69              | 5.5 (4.4 - 7.0)         | T      | 10             | 2.4 (1.3 - 4.5)          | T      |
| • Enterocolitis                                                 | 6                             | 37.9 (17.1 - 84.1)     | T      | 56              | 91.6 (70.4 - 119.2)     | T      | 6              | 29 (13.1 - 64.5)         | T      |
| Lower respiratory tract inflammatory and immunologic conditions | 22                            | 9.7 (6.4 - 14.6)       | T      | 38              | 4.2 (3.1 - 5.8)         | T      | 21             | 7.1 (4.6 - 10.8)         | T      |
| • Pneumonitis                                                   | 21                            | 27.9 (18.3 - 42.5)     | T      | 33              | 11.1 (7.9 - 15.6)       | T      | 16             | 16.3 (10.0 - 26.5)       | T      |
| Respiratory tract disorders nec                                 | 9                             | 2 (1.0 - 3.8)          | F      | 9               | 0.5 (0.3 - 1.0)         | T      | 13             | 2.2 (1.3 - 3.8)          | T      |
| • Lung disorder                                                 | 7                             | 4.1 (2.0 - 8.6)        | T      | 6               | 0.9 (0.4 - 2.0)         | F      | 11             | 4.9 (2.7 - 8.9)          | T      |
| Liver function analyses                                         | 29                            | 3.2 (2.2 - 4.5)        | T      | 80              | 2.2 (1.8 - 2.7)         | T      | 46             | 3.8 (2.9 - 5.1)          | T      |
| Rashes, eruptions and exanthems nec                             | 49                            | 2.6 (2.0 - 3.4)        | T      | 208             | 2.8 (2.5 - 3.2)         | T      | 29             | 1.2 (0.8 - 1.7)          | F      |
| • Rash                                                          | 38                            | 2.8 (2.1 - 3.8)        | T      | 176             | 3.3 (2.9 - 3.8)         | T      | 26             | 1.5 (1.0 - 2.2)          | F      |
| Hepatic enzymes and function abnormalities                      | 9                             | 4.6 (2.4 - 8.7)        | T      | 17              | 2.2 (1.4 - 3.5)         | T      | 16             | 6.2 (3.8 - 10.1)         | T      |
| • Hepatic function abnormal                                     | 8                             | 5.9 (2.9 - 11.7)       | T      | 7               | 1.3 (0.6 - 2.7)         | F      | 15             | 8.5 (5.1 - 14.0)         | T      |

|                                                                |    |                    |   |    |                    |   |    |                    |   |
|----------------------------------------------------------------|----|--------------------|---|----|--------------------|---|----|--------------------|---|
| Thyroid analyses                                               | 10 | 29.2 (15.8 - 54.0) | T | 6  | 4.4 (2.0 - 9.8)    | T | 13 | 29.1 (17.0 - 50.0) | T |
| Anaemias nec                                                   | 5  | 0.6 (0.2 - 1.4)    | F | 48 | 1.4 (1.1 - 1.8)    | T | 12 | 1.1 (0.6 - 1.9)    | F |
| • Anaemia                                                      | 5  | 0.6 (0.3 - 1.5)    | F | 46 | 1.5 (1.1 - 2.0)    | T | 12 | 1.2 (0.7 - 2.1)    | F |
| Sepsis, bacteraemia, viraemia and fungaemia nec                | 14 | 2 (1.2 - 3.4)      | T | 50 | 1.8 (1.4 - 2.4)    | T | 18 | 2 (1.3 - 3.1)      | T |
| • Sepsis                                                       | 11 | 2.5 (1.4 - 4.6)    | T | 38 | 2.2 (1.6 - 3.1)    | T | 11 | 2 (1.1 - 3.5)      | T |
| Iris and uveal tract infections, irritations and inflammations | 5  | 10.5 (4.4 - 25.2)  | T | 21 | 11.2 (7.3 - 17.2)  | T | 11 | 17.8 (9.9 - 32.0)  | T |
| • Uveitis                                                      | 5  | 17.3 (7.2 - 41.5)  | T | 14 | 12.3 (7.3 - 20.7)  | T | 10 | 26.6 (14.3 - 49.3) | T |
| Total fluid volume decreased                                   | 14 | 2.2 (1.3 - 3.8)    | T | 78 | 3.2 (2.5 - 4.0)    | T | 6  | 0.7 (0.3 - 1.6)    | F |
| • Dehydration                                                  | 14 | 2.4 (1.5 - 4.1)    | T | 78 | 3.4 (2.8 - 4.3)    | T | 6  | 0.8 (0.4 - 1.8)    | F |
| Hepatocellular damage and hepatitis nec                        | 41 | 9.7 (7.2 - 13.0)   | T | 82 | 4.9 (4.0 - 6.1)    | T | 20 | 3.6 (2.4 - 5.6)    | T |
| • Autoimmune hepatitis                                         | 9  | 39.9 (20.8 - 76.3) | T | 28 | 31.5 (21.7 - 45.6) | T | 6  | 20.3 (9.2 - 45.2)  | T |
| • Hepatitis                                                    | 18 | 17.9 (11.3 - 28.2) | T | 36 | 9 (6.5 - 12.5)     | T | 7  | 5.3 (2.5 - 11.1)   | T |
| • Hepatotoxicity                                               | 7  | 10.9 (5.2 - 22.8)  | T | 8  | 3.2 (1.6 - 6.3)    | T | 3  | 3.6 (1.2 - 11.1)   | F |
| Sodium imbalance                                               | 9  | 3.7 (1.9 - 7.1)    | T | 35 | 3.6 (2.6 - 5.1)    | T | 8  | 2.5 (1.3 - 5.0)    | T |
| • Hyponatraemia                                                | 8  | 3.6 (1.8 - 7.3)    | T | 35 | 4 (3.0 - 5.6)      | T | 7  | 2.4 (1.2 - 5.1)    | T |

**Table 2:** Top twenty reported reactions in cohorts #3-#5 based on frequency (upper part of the table) and PRR disproportionality score (lower part of the table). Reaction terms highlighted in **bold** were part of both lists. We considered only statistically significant (at 0.05) reactions with PRR >1 that occurred in more than 1% of each cohort's AEs, and excluded the following terms: 'death', 'inappropriate schedule of drug administration', 'infusion related reaction', 'malignant neoplasm progression', 'metastases to central nervous system', 'neoplasm malignant', 'off label use', 'prescribed overdose', 'transfusion'.

| Cohort:          | #3: Ipilimumab and Nivolumab (together) |     |           |      |  | #4: Ipilimumab w/o Nivolumab         |     |        |      |  | #5: Nivolumab w/o Ipilimumab                |     |        |     |  |
|------------------|-----------------------------------------|-----|-----------|------|--|--------------------------------------|-----|--------|------|--|---------------------------------------------|-----|--------|-----|--|
| Top 20 reactions | NAME                                    | AEs | PRR       | %    |  | NAME                                 | AEs | PRR    | %    |  | NAME                                        | AEs | PRR    | %   |  |
| By Frequency     | DIARRHOEA                               | 175 | 3.8       | 11.1 |  | DIARRHOEA                            | 759 | 5.3    | 15.7 |  | DIARRHOEA                                   | 66  | 1.6    | 4.8 |  |
|                  | COLITIS                                 | 164 | 67.2      | 10.4 |  | COLITIS                              | 577 | 79.5   | 11.9 |  | HYPOTHYROIDISM                              | 65  | 29.8   | 4.7 |  |
|                  | PYREXIA                                 | 139 | 4.5       | 8.8  |  | RASH                                 | 282 | 2.9    | 5.8  |  | PYREXIA                                     | 60  | 2.2    | 4.4 |  |
|                  | RASH                                    | 60  | 1.9       | 3.8  |  | FATIGUE                              | 279 | 1.6    | 5.8  |  | ALANINE AMINOTRANSFERASE INCREASED          | 56  | 9.4    | 4.1 |  |
|                  | HYPOPHYSITIS                            | 58  | 703.3     | 3.7  |  | PYREXIA                              | 272 | 2.9    | 5.6  |  | ASPARTATE AMINOTRANSFERASE INCREASED        | 51  | 9.5    | 3.7 |  |
|                  | DEHYDRATION                             | 55  | 4.2       | 3.5  |  | NAUSEA                               | 243 | 1.2    | 5.0  |  | HEPATIC FUNCTION ABNORMAL                   | 41  | 15.0   | 2.9 |  |
|                  | VOMITING                                | 54  | 1.3       | 3.4  |  | HYPOPHYSITIS                         | 222 | 1442.7 | 4.6  |  | RASH                                        | 41  | 1.5    | 2.9 |  |
|                  | PNEUMONITIS                             | 52  | 30.0      | 3.3  |  | VOMITING                             | 219 | 1.7    | 4.5  |  | PRURITUS                                    | 40  | 1.9    | 2.9 |  |
|                  | Acute kidney injury                     | 49  | 10.3      | 3.1  |  | DEHYDRATION                          | 216 | 5.3    | 4.5  |  | DECREASED APPETITE                          | 38  | 2.5    | 2.8 |  |
|                  | ADRENAL INSUFFICIENCY                   | 45  | 78.1      | 2.9  |  | ABDOMINAL PAIN                       | 147 | 2.3    | 3.0  |  | INTERSTITIAL LUNG DISEASE                   | 33  | 10.3   | 2.4 |  |
|                  | HYPERTHYROIDISM                         | 45  | 42.9      | 2.9  |  | PRURITUS                             | 142 | 1.9    | 2.9  |  | GAMMA-GLUTAMYLTRANSFERASE INCREASED         | 32  | 13.8   | 2.3 |  |
|                  | HYPOTHYROIDISM                          | 41  | 16.3      | 2.6  |  | DECREASED APPETITE                   | 139 | 2.6    | 2.9  |  | COLITIS                                     | 31  | 14.4   | 2.3 |  |
|                  | ALANINE AMINOTRANSFERASE INCREASED      | 40  | 5.8       | 2.5  |  | ANAEMIA                              | 113 | 2.0    | 2.3  |  | BLOOD ALKALINE PHOSPHATASE INCREASED        | 30  | 10.8   | 2.2 |  |
|                  | HEPATITIS                               | 37  | 15.9      | 2.4  |  | HYPONATRAEMIA                        | 107 | 6.9    | 2.2  |  | ANAEMIA                                     | 28  | 1.8    | 2.0 |  |
|                  | ABDOMINAL PAIN                          | 34  | 1.6       | 2.2  |  | ADRENAL INSUFFICIENCY                | 105 | 60.5   | 2.2  |  | LEUKODERMA                                  | 26  | 3435.6 | 1.9 |  |
|                  | AUTOIMMUNE HEPATITIS                    | 34  | 65.9      | 2.2  |  | SEPSIS                               | 102 | 3.3    | 2.1  |  | PNEUMONITIS                                 | 25  | 16.6   | 1.8 |  |
|                  | GENERAL PHYSICAL HEALTH DETERIORATION   | 34  | 4.1       | 2.2  |  | WEIGHT DECREASED                     | 98  | 1.4    | 2.0  |  | GENERAL PHYSICAL HEALTH DETERIORATION       | 21  | 2.9    | 1.5 |  |
|                  | ASPARTATE AMINOTRANSFERASE INCREASED    | 32  | 5.2       | 2.0  |  | HYPOTENSION                          | 92  | 1.7    | 1.9  |  | AUTOIMMUNE HEPATITIS                        | 20  | 44.3   | 1.5 |  |
|                  | SEPSIS                                  | 31  | 3.1       | 1.9  |  | ALANINE AMINOTRANSFERASE INCREASED   | 85  | 4.0    | 1.8  |  | Acute kidney injury                         | 20  | 4.8    | 1.5 |  |
|                  | HYPONATRAEMIA   HYPOTENSION             | 30  | 5.9   1.7 | 1.9  |  | ASPARTATE AMINOTRANSFERASE INCREASED | 85  | 4.5    | 1.8  |  | RENAL FAILURE                               | 20  | 1.9    | 1.5 |  |
| By PRR           | NAME                                    | AEs | PRR       | %    |  | NAME                                 | AEs | PRR    | %    |  | NAME                                        | AEs | PRR    | %   |  |
|                  | Autoimmune colitis                      | 22  | 1463.8    | 1.4  |  | HYPOPHYSITIS                         | 222 | 1442.7 | 4.6  |  | LEUKODERMA                                  | 26  | 3435.6 | 1.9 |  |
|                  | HYPOPHYSITIS                            | 58  | 703.3     | 3.7  |  | HYPOPITUITARISM                      | 57  | 231.9  | 1.2  |  | AUTOIMMUNE HEPATITIS                        | 20  | 44.3   | 1.5 |  |
|                  | HYPOPITUITARISM                         | 22  | 253.4     | 1.4  |  | COLITIS                              | 577 | 79.5   | 11.9 |  | HYPOTHYROIDISM                              | 65  | 29.8   | 4.8 |  |
|                  | THYROIDITIS                             | 17  | 105.9     | 1.1  |  | ENTEROCOLITIS                        | 81  | 75.1   | 1.7  |  | ADRENAL INSUFFICIENCY                       | 15  | 29.6   | 1.1 |  |
|                  | ADRENAL INSUFFICIENCY                   | 45  | 78.1      | 2.9  |  | ADRENAL INSUFFICIENCY                | 105 | 60.5   | 2.2  |  | UVEITIS                                     | 16  | 27.7   | 1.2 |  |
|                  | COLITIS                                 | 164 | 67.2      | 10.4 |  | LARGE INTESTINE PERFORATION          | 66  | 34.0   | 1.4  |  | BLOOD THYROID STIMULATING HORMONE INCREASED | 15  | 27.5   | 1.1 |  |
|                  | AUTOIMMUNE HEPATITIS                    | 34  | 65.8      | 2.2  |  | LIPASE INCREASED                     | 62  | 25.1   | 1.3  |  | MYOSITIS                                    | 14  | 21.8   | 1.1 |  |
|                  | ENTEROCOLITIS                           | 17  | 46.8      | 1.01 |  | INTESTINAL PERFORATION               | 75  | 23.8   | 1.6  |  | PNEUMONITIS                                 | 25  | 16.6   | 1.8 |  |
|                  | HYPERTHYROIDISM                         | 45  | 42.9      | 2.9  |  | PNEUMONITIS                          | 60  | 11.3   | 1.2  |  | HYPERTHYROIDISM                             | 15  | 16.3   | 1.1 |  |
|                  | TYPE 1 DIABETES MELLITUS                | 17  | 35.5      | 1.1  |  | RASH MACULO-PAPULAR                  | 51  | 9.6    | 1.1  |  | HEPATIC FUNCTION ABNORMAL                   | 41  | 15.0   | 2.9 |  |
|                  | MYOCARDITIS                             | 18  | 33.8      | 1.1  |  | HYPOTHYROIDISM                       | 70  | 9.1    | 1.5  |  | COLITIS                                     | 31  | 14.4   | 2.3 |  |
|                  | PNEUMONITIS                             | 52  | 30.0      | 3.3  |  | HEPATITIS                            | 59  | 8.3    | 1.2  |  | GAMMA-GLUTAMYLTRANSFERASE INCREASED         | 32  | 13.8   | 2.3 |  |
|                  | LIPASE INCREASED                        | 17  | 20.9      | 1.1  |  | HYPONATRAEMIA                        | 107 | 6.9    | 2.2  |  | BLOOD ALKALINE PHOSPHATASE INCREASED        | 30  | 10.8   | 2.2 |  |
|                  | HYPOTHYROIDISM                          | 41  | 16.3      | 2.6  |  | DEHYDRATION                          | 216 | 5.3    | 4.5  |  | DIABETIC KETOACIDOSIS                       | 16  | 10.4   | 1.2 |  |
|                  | HEPATITIS                               | 37  | 15.9      | 2.4  |  | DIARRHOEA                            | 759 | 5.3    | 15.7 |  | INTERSTITIAL LUNG DISEASE                   | 33  | 10.3   | 2.4 |  |
|                  | HEPATOTOXICITY                          | 18  | 12.2      | 1.1  |  | ASPARTATE AMINOTRANSFERASE INCREASED | 85  | 4.5    | 1.8  |  | ASPARTATE AMINOTRANSFERASE INCREASED        | 51  | 9.5    | 3.7 |  |
|                  | TRANSAMINASES INCREASED                 | 20  | 10.9      | 1.3  |  | HYPOKALAEMIA                         | 50  | 4.2    | 1.0  |  | ALANINE AMINOTRANSFERASE INCREASED          | 56  | 9.4    | 4.1 |  |
|                  | Acute kidney injury                     | 49  | 10.3      | 3.1  |  | ALANINE AMINOTRANSFERASE INCREASED   | 85  | 4.0    | 1.8  |  | C-REACTIVE PROTEIN INCREASED                | 15  | 6.5    | 1.1 |  |
|                  | DIABETIC KETOACIDOSIS                   | 17  | 9.6       | 1.1  |  | Acute kidney injury                  | 49  | 3.3    | 1.0  |  | Acute kidney injury                         | 20  | 4.8    | 1.5 |  |
|                  | LIVER DISORDER                          | 28  | 6.9       | 1.8  |  | SEPSIS                               | 102 | 3.3    | 2.1  |  | LUNG DISORDER                               | 15  | 4.4    | 1.1 |  |

**Figure 1:** Simplified overview of the mechanisms of action of checkpoint inhibitors. PD-1 antibodies (nivolumab, pembrolizumab) prevent the interaction of PD-1 with its ligand PD-L1. CTLA-4 antibodies (ipilimumab, tremelimumab) block the interaction between CTLA-4 and its receptor CD80. Both types of inhibitors lead to the activation of the T-cell. Checkpoint inhibitors play also key role in autoimmune conditions. One such example is myocarditis that patients may develop via T-cell infiltration at the site of myocardium [1]. Such massive tissue destruction was observed also in genetically modified mouse models with impaired CTLA4 expression [2]. Second, tumor neoantigens and antigens from healthy tissue could cross-react. Development of vitiligo and other hypopigmentation diseases in melanoma patients under immunotherapy illustrates this situation where normal melanocytes are also being targeted by immune cells [3]. In addition to increased T-cell activity, expansion of already present autoantibodies could account for adverse effects, like thyroiditis [4]. Moreover, secretion of inflammatory cytokines in response to treatment has been observed in the case of colitis both in patients and animal models [5]. Finally, normal tissues actually expressing the checkpoint molecules (i.e. CTLA4 in the pituitary gland) may exhibit inflammation enhancement via activation of the complement.

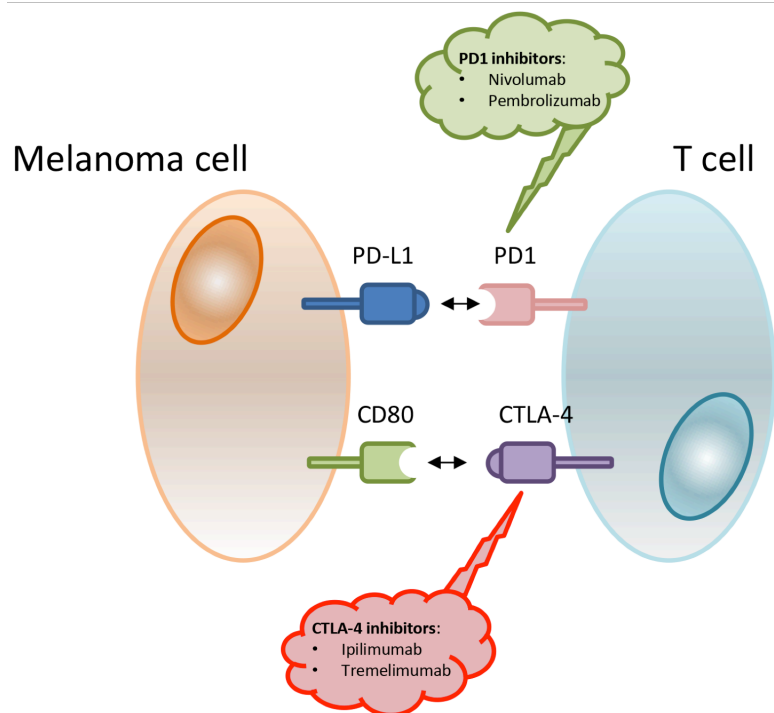

**Figure 2:** Distribution of outcomes 'Death' and 'Hospitalization' in each cohort. We contrasted the reporting of 'Death' and 'Hospitalization' as outcomes between the examined cohorts #1-#8 and (a) the overall FAERS dataset (named 'FAERS'), AE cases where indication term(s) linked to the highest level MedDRA term 'Neoplasms benign, malignant and unspecified (incl cysts and polyps)' (named 'Cancer'), and the 'general melanoma' patient (named 'Skin melanomas'; defined as the AE cases with indication(s) linked to the HLT MedDRA term 'Skin melanomas (excl ocular)'). In comparison to the 'general melanoma patient' in FAERS, we observe reduced death occurrence, especially for the ipilimumab and the ipilimumab plus nivolumab groups. Also, note that direct comparison to the 'general melanoma patient' is somewhat unfair without an exact disease stage dissemination of those patients. We also compared the occurrence of these outcomes in the presence and absence of reactions from each cohort's side effect profile: in (b) we statistically measure the difference in cohorts #3-#8, when all reactions from each side-effect profile are considered together for the respective cohort – in all cases, 'Death' is under-represented (PRR <1) and 'Hospitalization' is over-represented (PRR >1) upon manifestation of the respective reactions; all associations are statistically significant ( $p$ -value<0.05) except for 'Death' in cohort #5.

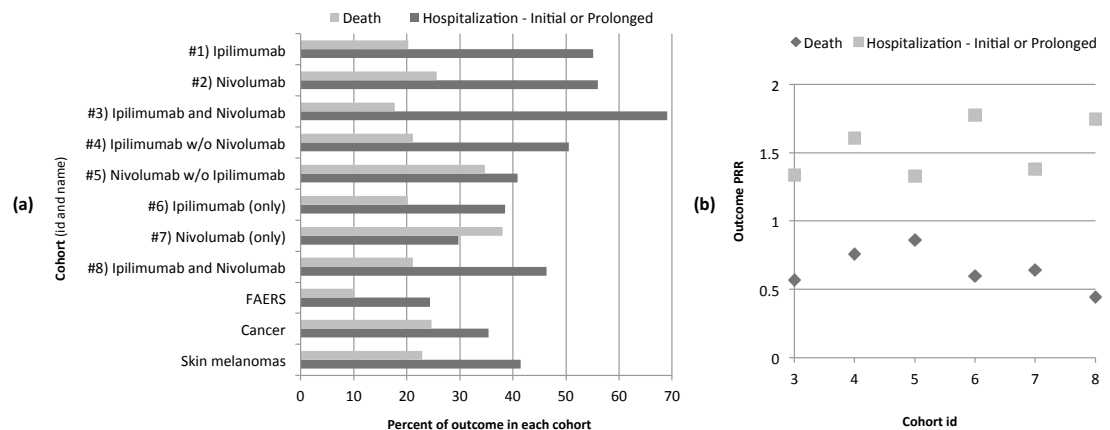

**Figure 3:** Radiologic manifestations of irAEs. Despite sometimes being clinically silent, irAEs are very often associated with radiologic manifestations. Towards successful management, radiologists should be educated on irAE imaging patterns, since early detection can lead to timely discontinuation of immunotherapy and the initiation of corticosteroid treatment. To this end, morphologic techniques like computed tomography (CT) and magnetic resonance imaging (MRI) can be used, together with more novel, functional imaging modalities, like positron emission tomography/computed tomography (PET/CT) that provides metabolic tissue assessment. This is of particular significance, since functional/metabolic tissue changes most of the times precede respective anatomic changes [6]. The illustration presents one such PET/CT example with the radiotracer fluorodeoxyglucose ( $^{18}\text{F}$ -FDG) of an advanced melanoma patient demonstrating radiologic signs of colitis undergoing a 4-cycle ipilimumab treatment. (A) Baseline PET/CT before onset of treatment demonstrated metastatic lesions in the left lung and the right leg. (B)  $^{18}\text{F}$ -FDG PET/CT performed after two cycles of ipilimumab revealed progressive disease with increase in the number, size and metabolism of the metastatic lesions and at the same time diffusely increased tracer uptake in the descending colon, indicative of colitis. (C) PET/CT performed after the end of the four-cycle ipilimumab treatment demonstrated progressive disease with further increase in the number and intensity of uptake of the metastatic lesions, as well as persistence and expansion of the immune-related colitis in the transverse and upper ascending colon. (D) One month after the end of immunotherapy, PET/CT revealed dramatic progression of the metastatic disease and remission of the colitis.

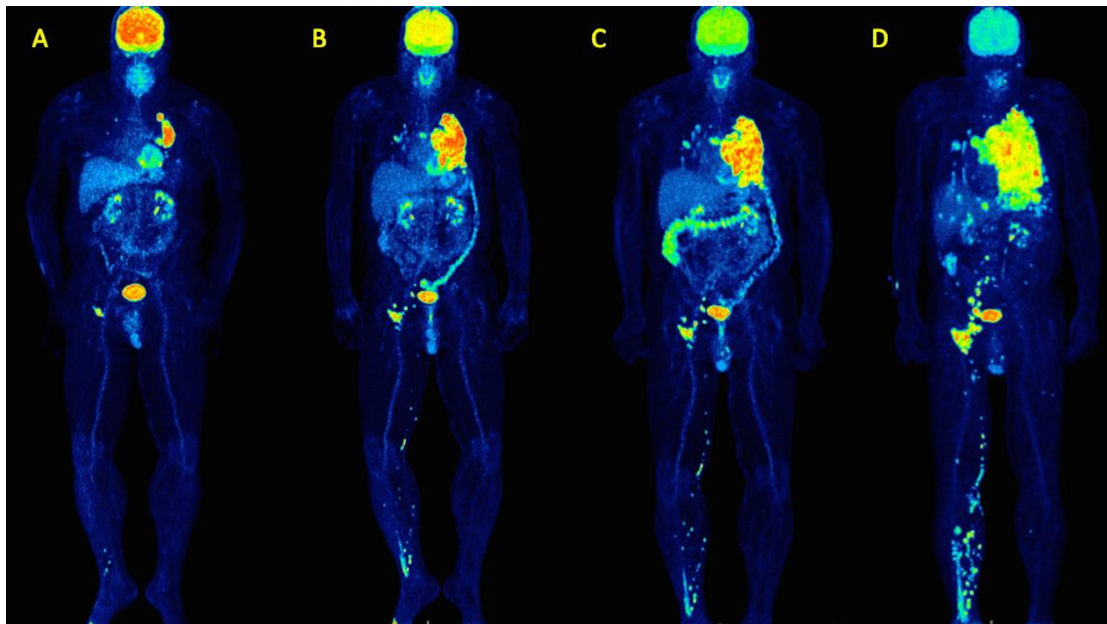

## References:

1. Johnson, D. B. *et al.* Fulminant Myocarditis with Combination Immune Checkpoint Blockade. *N. Engl. J. Med.* **375**, 1749–1755 (2016).
2. Tivol, E. A. *et al.* Loss of CTLA-4 leads to massive lymphoproliferation and fatal multiorgan tissue destruction, revealing a critical negative regulatory role of CTLA-4. *Immunity* **3**, 541–547 (1995).
3. Byrne, E. H. & Fisher, D. E. Immune and molecular correlates in melanoma treated with immune checkpoint blockade. *Cancer* **123**, 2143–2153 (2017).
4. Osorio, J. C. *et al.* Antibody-mediated thyroid dysfunction during T-cell checkpoint blockade in patients with non-small-cell lung cancer. *Ann. Oncol.* **28**, 583–589 (2017).
5. Callahan, M. K. *et al.* Evaluation of serum IL-17 levels during ipilimumab therapy: Correlation with colitis. *JCO* **29**, 2505–2505 (2011).
6. Wahl, R. L., Jacene, H., Kasamon, Y. & Lodge, M. A. From RECIST to PERCIST: Evolving Considerations for PET response criteria in solid tumors. *J. Nucl. Med.* **50 Suppl 1**, 122S–50S (2009).
