# Supplementary material for: Retrospective Side Effect Profiling of the Metastatic Melanoma Combination Therapy Ipilimumab-Nivolumab Using Adverse Event Data
Source: Diagnostics (Basel). 2018 Oct 31;8(4):76. doi: 10.3390/diagnostics8040076 (PMC6316083; doi:10.3390/diagnostics8040076)
Supplement: Supplementary file 1 [file diagnostics-08-00076-s001.zip › Supplement material S2.xlsx]

## Sheet: Cohort 1
COHORT	CONCEPT	NAME	CONCEPT_AES_IN_COHORT	CONCEPT_CASE_COUNT	COHORT_SIZE	PRR	PRR_95CI(-)	PRR_95CI(+)	P-value Fisher Exact Test (two tailed)	COHORT_%COVERAGE	Significant_FisherExactTest
1	Reaction	DIARRHOEA	934	235661	6413	4.93557	4.65087	5.23769	0	14.5642	TRUE
1	Reaction	COLITIS	741	12513	6413	78.0767	72.7924	83.7445	0	11.5547	TRUE
1	Reaction	MALIGNANT NEOPLASM PROGRESSION	718	30093	6413	30.3179	28.272	32.512	0	11.196	TRUE
1	Reaction	DEATH	428	340884	6413	1.55932	1.42286	1.70887	0	6.67394	TRUE
1	Reaction	PYREXIA	411	155533	6413	3.28641	2.99258	3.60909	0	6.40886	TRUE
1	Reaction	RASH	342	157441	6413	2.70026	2.4354	2.99392	0	5.33292	TRUE
1	Reaction	FATIGUE	333	290118	6413	1.42535	1.28374	1.58259	0	5.19258	TRUE
1	Reaction	NAUSEA	317	342597	6413	1.14876	1.0318	1.27898	0.01265	4.94308	TRUE
1	Reaction	HYPOPHYSITIS	280	475	6413	1781.05	1485.93	2134.79	0	4.36613	TRUE
1	Reaction	VOMITING	273	208039	6413	1.62983	1.4511	1.83056	0	4.25698	TRUE
1	Reaction	DEHYDRATION	271	67030	6413	5.03515	4.48026	5.65877	0	4.22579	TRUE
1	Reaction	HEADACHE	222	267648	6413	1.02968	0.90479	1.17181	0.65227	3.46172	FALSE
1	Reaction	DYSPNOEA	190	243040	6413	0.97044	0.84355	1.11641	0.71647	2.96273	FALSE
1	Reaction	ABDOMINAL PAIN	181	104338	6413	2.15548	1.86688	2.48868	0	2.82239	TRUE
1	Reaction	NEOPLASM MALIGNANT	180	22410	6413	10.0435	8.69116	11.6063	0	2.8068	TRUE
1	Reaction	PRURITUS	168	125446	6413	1.66337	1.43264	1.93125	0	2.61968	TRUE
1	Reaction	DECREASED APPETITE	165	87299	6413	2.34882	2.02012	2.731	0	2.5729	TRUE
1	Reaction	ADRENAL INSUFFICIENCY	150	2959	6413	66.2358	56.3063	77.9164	0	2.339	TRUE
1	Reaction	HYPONATRAEMIA	137	25655	6413	6.65928	5.64011	7.86261	0	2.13629	TRUE
1	Reaction	ANAEMIA	136	91531	6413	1.84574	1.5628	2.1799	0	2.12069	TRUE
1	Reaction	ASTHENIA	134	166251	6413	1.00056	0.84616	1.18314	0.96516	2.08951	FALSE
1	Reaction	SEPSIS	133	50407	6413	3.28142	2.77283	3.88329	0	2.07391	TRUE
1	Reaction	ALANINE AMINOTRANSFERASE INCREASED	125	34856	6413	4.46422	3.75162	5.31218	0	1.94917	TRUE
1	Reaction	HYPOTENSION	122	87147	6413	1.73888	1.45843	2.07325	0	1.90239	TRUE
1	Reaction	PNEUMONIA	120	128928	6413	1.15556	0.96779	1.37976	0.11305	1.8712	FALSE
1	Reaction	ASPARTATE AMINOTRANSFERASE INCREASED	117	31426	6413	4.63522	3.87212	5.5487	0	1.82442	TRUE
1	Reaction	WEIGHT DECREASED	115	115015	6413	1.24146	1.03569	1.4881	0.02416	1.79323	TRUE
1	Reaction	PNEUMONITIS	112	8805	6413	15.9809	13.2848	19.2242	0	1.74645	TRUE
1	Reaction	HYPOTHYROIDISM	111	12738	6413	10.9038	9.05998	13.1227	0	1.73086	TRUE
1	Reaction	OFF LABEL USE	102	149692	6413	0.84577	0.69761	1.02539	0.08879	1.59052	FALSE
1	Reaction	Acute kidney injury	98	24144	6413	5.05518	4.15178	6.15515	0	1.52815	TRUE
1	Reaction	ENTEROCOLITIS	98	1855	6413	69.1843	56.5325	84.6675	0	1.52815	TRUE
1	Reaction	MUSCULAR WEAKNESS	98	53551	6413	2.27409	1.86811	2.7683	0	1.52815	TRUE
1	Reaction	HEPATITIS	96	11781	6413	10.1905	8.34859	12.4388	0	1.49696	TRUE
1	Reaction	GENERAL PHYSICAL HEALTH DETERIORATION	92	41638	6413	2.7467	2.24185	3.36525	0	1.43459	TRUE
1	Reaction	PAIN	89	231205	6413	0.47765	0.38859	0.58713	0	1.38781	TRUE
1	Reaction	ARTHRALGIA	87	154147	6413	0.70046	0.56848	0.86307	0.00047	1.35662	TRUE
1	Reaction	HYPERTHYROIDISM	86	5350	6413	20.2645	16.3988	25.0414	0	1.34103	TRUE
1	Reaction	INTESTINAL PERFORATION	82	5252	6413	19.6733	15.8391	24.4355	0	1.27865	TRUE
1	Reaction	AUTOIMMUNE HEPATITIS	81	2645	6413	39.185	31.452	48.8193	0	1.26306	TRUE
1	Reaction	CONFUSIONAL STATE	81	76769	6413	1.31012	1.05507	1.62683	0.0178	1.26306	TRUE
1	Reaction	CHILLS	80	53552	6413	1.85574	1.49236	2.3076	0	1.24747	TRUE
1	Reaction	BACK PAIN	79	102670	6413	0.95515	0.76711	1.18928	0.73963	1.23187	FALSE
1	Reaction	HYPOPITUITARISM	79	461	6413	256.517	201.58	326.427	0	1.23187	TRUE
1	Reaction	LIPASE INCREASED	79	4129	6413	24.195	19.3916	30.1882	0	1.23187	TRUE
1	Reaction	MALAISE	77	194484	6413	0.49128	0.39345	0.61344	0	1.20069	TRUE
1	Reaction	METASTASES TO CENTRAL NERVOUS SYSTEM	77	4640	6413	20.9312	16.7322	26.1839	0	1.20069	TRUE
1	Reaction	CONSTIPATION	75	80726	6413	1.15347	0.92097	1.44465	0.21202	1.1695	FALSE
1	Reaction	PULMONARY EMBOLISM	74	54859	6413	1.67542	1.3356	2.10169	4e-05	1.15391	TRUE
1	Reaction	RENAL FAILURE ACUTE	74	44749	6413	2.05457	1.63779	2.5774	0	1.15391	TRUE
1	Reaction	ATRIAL FIBRILLATION	73	42363	6413	2.14111	1.70409	2.69019	0	1.13831	TRUE
1	Reaction	LARGE INTESTINE PERFORATION	69	3256	6413	26.8547	21.1831	34.0448	0	1.07594	TRUE
1	Reaction	RENAL FAILURE	69	59607	6413	1.4375	1.13665	1.81798	0.00367	1.07594	TRUE
1	Reaction	ADVERSE EVENT	68	44953	6413	1.87915	1.48322	2.38076	0	1.06035	TRUE
1	Reaction	THROMBOCYTOPENIA	68	47092	6413	1.79367	1.41577	2.27245	1e-05	1.06035	TRUE
1	Reaction	RASH MACULO-PAPULAR	65	8773	6413	9.25866	7.26289	11.8029	0	1.01357	TRUE
1	Reaction	HYPOKALAEMIA	64	19848	6413	4.01254	3.14323	5.12226	0	0.99797	TRUE
1	Reaction	PRESCRIBED OVERDOSE	63	7523	6413	10.475	8.18438	13.4068	0	0.98238	TRUE
1	Reaction	COUGH	61	102635	6413	0.73764	0.57457	0.94699	0.01471	0.95119	TRUE
1	Reaction	DIZZINESS	61	225173	6413	0.33611	0.26182	0.43149	0	0.95119	TRUE
1	Reaction	SYNCOPE	60	47597	6413	1.56557	1.21682	2.01427	0.00111	0.9356	TRUE
1	Reaction	PLEURAL EFFUSION	56	30354	6413	2.29259	1.76592	2.97635	0	0.87323	TRUE
1	Reaction	HYPERTENSION	55	94216	6413	0.72451	0.55684	0.94268	0.01506	0.85763	TRUE
1	Reaction	LIVER DISORDER	55	20495	6413	3.33761	2.56446	4.34385	0	0.85763	TRUE
1	Reaction	MYALGIA	50	78186	6413	0.79373	0.60218	1.04621	0.11267	0.77967	FALSE
1	Reaction	NEUROPATHY PERIPHERAL	50	32447	6413	1.91434	1.45216	2.5236	3e-05	0.77967	TRUE
1	Reaction	GASTROINTESTINAL HAEMORRHAGE	48	50253	6413	1.1859	0.89451	1.5722	0.23592	0.74848	FALSE
1	Reaction	HEPATIC ENZYME INCREASED	47	25839	6413	2.2603	1.6996	3.00598	0	0.73289	TRUE
1	Reaction	PAIN IN EXTREMITY	47	137541	6413	0.424	0.31889	0.56376	0	0.73289	TRUE
1	Reaction	RASH PRURITIC	47	22582	6413	2.58698	1.94517	3.44057	0	0.73289	TRUE
1	Reaction	PANCREATITIS	46	29276	6413	1.95201	1.46329	2.60397	4e-05	0.71729	TRUE
1	Reaction	TRANSAMINASES INCREASED	46	9299	6413	6.16635	4.62021	8.22991	0	0.71729	TRUE
1	Reaction	URINARY TRACT INFECTION	46	66114	6413	0.86361	0.64747	1.15191	0.37014	0.71729	FALSE
1	Reaction	Autoimmune colitis	45	98	6413	1053.15	708.386	1565.7	0	0.7017	TRUE
1	Reaction	HEPATOTOXICITY	45	7483	6413	7.50429	5.60376	10.0494	0	0.7017	TRUE
1	Reaction	OEDEMA PERIPHERAL	44	76483	6413	0.71399	0.53183	0.95854	0.02466	0.68611	TRUE
1	Reaction	BLOOD CREATININE INCREASED	43	33009	6413	1.61791	1.20087	2.17978	0.00329	0.67051	TRUE
1	Reaction	FALL	43	144247	6413	0.36987	0.27457	0.49824	0	0.67051	TRUE
1	Reaction	HYPERGLYCAEMIA	43	17896	6413	2.98752	2.21708	4.02569	0	0.67051	TRUE
1	Reaction	RESPIRATORY FAILURE	43	35651	6413	1.49787	1.11179	2.01802	0.01116	0.67051	TRUE
1	Reaction	ABDOMINAL PAIN UPPER	41	85903	6413	0.59229	0.43651	0.80367	0.00034	0.63933	TRUE
1	Reaction	BLOOD BILIRUBIN INCREASED	41	15988	6413	3.18903	2.3495	4.32854	0	0.63933	TRUE
1	Reaction	THYROIDITIS	41	829	6413	64.5373	47.1926	88.2567	0	0.63933	TRUE
1	Reaction	VISION BLURRED	41	61643	6413	0.82555	0.6084	1.12021	0.25334	0.63933	FALSE
1	Reaction	INFECTION	40	52911	6413	0.93842	0.68893	1.27825	0.75837	0.62373	FALSE
1	Reaction	INFUSION RELATED REACTION	37	20309	6413	2.26391	1.64133	3.12263	1e-05	0.57695	TRUE
1	Reaction	BLOOD ALKALINE PHOSPHATASE INCREASED	36	16186	6413	2.76492	1.99551	3.831	0	0.56136	TRUE
1	Reaction	CARDIAC ARREST	36	44811	6413	0.99729	0.71993	1.38149	1	0.56136	FALSE
1	Reaction	DERMATITIS	36	5939	6413	7.56455	5.45606	10.4878	0	0.56136	TRUE
1	Reaction	HEPATIC FAILURE	36	16258	6413	2.75265	1.98666	3.81399	0	0.56136	TRUE
1	Reaction	CHEST PAIN	35	97663	6413	0.44468	0.31955	0.61882	0	0.54577	TRUE
1	Reaction	MALIGNANT MELANOMA	35	5405	6413	8.08439	5.80349	11.2617	0	0.54577	TRUE
1	Reaction	NEOPLASM PROGRESSION	35	8214	6413	5.30788	3.81175	7.39125	0	0.54577	TRUE
1	Reaction	PANCYTOPENIA	35	24659	6413	1.76304	1.26669	2.45388	0.00214	0.54577	TRUE
1	Reaction	SEPTIC SHOCK	35	17275	6413	2.51816	1.80904	3.50525	0	0.54577	TRUE
1	Reaction	CEREBRAL HAEMORRHAGE	34	17593	6413	2.40178	1.7171	3.35945	1e-05	0.53017	TRUE
1	Reaction	DEEP VEIN THROMBOSIS	34	41412	6413	1.01921	0.7288	1.42534	0.86208	0.53017	FALSE
1	Reaction	GASTROINTESTINAL DISORDER	34	27023	6413	1.56259	1.11727	2.18541	0.01297	0.53017	TRUE
1	Reaction	ARTHRITIS	33	31815	6413	1.28791	0.91625	1.81033	0.13771	0.51458	FALSE
1	Reaction	DIABETES MELLITUS	33	40952	6413	1.00033	0.71168	1.40604	0.93051	0.51458	FALSE
1	Reaction	HEPATOCELLULAR INJURY	33	4607	6413	8.94893	6.35975	12.5922	0	0.51458	TRUE
1	Reaction	PLATELET COUNT DECREASED	33	44607	6413	0.9183	0.65333	1.29073	0.73726	0.51458	FALSE
1	Reaction	RECTAL HAEMORRHAGE	33	21698	6413	1.88933	1.344	2.65593	0.00071	0.51458	TRUE
1	Reaction	UVEITIS	33	3374	6413	12.2515	8.70288	17.2472	0	0.51458	TRUE
1	Reaction	CELLULITIS	32	22835	6413	1.74065	1.2317	2.45989	0.00324	0.49899	TRUE
1	Reaction	INTERSTITIAL LUNG DISEASE	32	18587	6413	2.13915	1.51361	3.02323	0.00012	0.49899	TRUE
1	Reaction	LIVER FUNCTION TEST ABNORMAL	32	20957	6413	1.89687	1.34222	2.68072	0.00085	0.49899	TRUE
1	Reaction	ERYTHEMA	31	69879	6413	0.5505	0.38745	0.78218	0.00036	0.48339	TRUE
1	Reaction	HEPATIC FUNCTION ABNORMAL	31	15901	6413	2.42291	1.70481	3.4435	1e-05	0.48339	TRUE
1	Reaction	LUNG INFECTION	31	11176	6413	3.45013	2.42722	4.90412	0	0.48339	TRUE
1	Reaction	DYSPHAGIA	30	41787	6413	0.89114	0.62351	1.27364	0.60355	0.4678	FALSE
1	Reaction	HYPOAESTHESIA	30	70682	6413	0.52668	0.36853	0.75271	0.00014	0.4678	TRUE
1	Reaction	LETHARGY	30	29306	6413	1.27105	0.88928	1.81672	0.17955	0.4678	FALSE
1	Reaction	MYOCARDITIS	30	2713	6413	13.8693	9.68588	19.8595	0	0.4678	TRUE
1	Reaction	AMYLASE INCREASED	29	1433	6413	25.6203	17.752	36.9761	0	0.45221	TRUE
1	Reaction	METASTATIC MALIGNANT MELANOMA	29	896	6413	41.4889	28.6811	60.0162	0	0.45221	TRUE
1	Reaction	TYPE 1 DIABETES MELLITUS	29	2436	6413	14.9443	10.3709	21.5345	0	0.45221	TRUE
1	Reaction	PARAESTHESIA	28	76635	6413	0.45336	0.31326	0.65612	0	0.43661	TRUE
1	Reaction	TUBULOINTERSTITIAL NEPHRITIS	28	4827	6413	7.23703	4.99549	10.4844	0	0.43661	TRUE
1	Reaction	DRUG INEFFECTIVE	27	453261	6413	0.07389	0.05071	0.10766	0	0.42102	TRUE
1	Reaction	MULTI-ORGAN FAILURE	27	18510	6413	1.81194	1.24324	2.6408	0.00392	0.42102	TRUE
1	Reaction	MYOCARDIAL INFARCTION	27	125804	6413	0.26627	0.18274	0.38798	0	0.42102	TRUE
1	Reaction	NEUTROPENIA	27	43670	6413	0.76737	0.5266	1.11821	0.20329	0.42102	FALSE
1	Reaction	VITILIGO	27	568	6413	61.9041	42.0922	91.0411	0	0.42102	TRUE
1	Reaction	AUTOIMMUNE DISORDER	26	2268	6413	14.3844	9.7797	21.1571	0	0.40543	TRUE
1	Reaction	CHOLESTASIS	26	7435	6413	4.35278	2.96398	6.39232	0	0.40543	TRUE
1	Reaction	CONVULSION	26	60370	6413	0.53443	0.36413	0.78438	0.00052	0.40543	TRUE
1	Reaction	DIABETIC KETOACIDOSIS	26	8928	6413	3.62276	2.46716	5.31963	0	0.40543	TRUE
1	Reaction	ENTERITIS	26	2035	6413	16.0526	10.9111	23.617	0	0.40543	TRUE
1	Reaction	COLITIS ULCERATIVE	25	11197	6413	2.77563	1.87612	4.10643	1e-05	0.38983	TRUE
1	Reaction	DIARRHOEA HAEMORRHAGIC	25	3989	6413	7.82275	5.28338	11.5826	0	0.38983	TRUE
1	Reaction	GAIT DISTURBANCE	25	86232	6413	0.35971	0.24323	0.53197	0	0.38983	TRUE
1	Reaction	INSOMNIA	25	128002	6413	0.2423	0.16385	0.35833	0	0.38983	TRUE
1	Reaction	LYMPHOCYTIC HYPOPHYSITIS	25	60	6413	885.983	530.613	1479.35	0	0.38983	TRUE
1	Reaction	RASH GENERALISED	25	20729	6413	1.49775	1.01257	2.2154	0.04879	0.38983	TRUE
1	Reaction	TRANSFUSION	25	4687	6413	6.65152	4.49317	9.84666	0	0.38983	TRUE
1	Reaction	BLOOD THYROID STIMULATING HORMONE DECREASED	24	1615	6413	18.7109	12.5129	27.9789	0	0.37424	TRUE
1	Reaction	CEREBROVASCULAR ACCIDENT	24	99880	6413	0.29812	0.19996	0.44447	0	0.37424	TRUE
1	Reaction	DEPRESSION	24	119965	6413	0.2482	0.16648	0.37003	0	0.37424	TRUE
1	Reaction	GASTRITIS	24	13538	6413	2.20283	1.47706	3.28521	0.00062	0.37424	TRUE
1	Reaction	HAEMATOCHEZIA	24	18841	6413	1.58203	1.0609	2.35914	0.02851	0.37424	TRUE
1	Reaction	HYPERSENSITIVITY	24	70580	6413	0.42192	0.28299	0.62905	0	0.37424	TRUE
1	Reaction	HYPOALBUMINAEMIA	24	3484	6413	8.60376	5.76312	12.8446	0	0.37424	TRUE
1	Reaction	INFLUENZA LIKE ILLNESS	24	44482	6413	0.6696	0.4491	0.99837	0.04422	0.37424	TRUE
1	Reaction	LYMPHOCYTE COUNT DECREASED	24	6071	6413	4.92294	3.29952	7.3451	0	0.37424	TRUE
1	Reaction	SOMNOLENCE	24	88293	6413	0.33725	0.22621	0.50281	0	0.37424	TRUE
1	Reaction	STOMATITIS	24	22411	6413	1.32975	0.89176	1.98285	0.15635	0.37424	FALSE
1	Reaction	ABDOMINAL DISTENSION	23	44765	6413	0.63763	0.42398	0.95892	0.02924	0.35865	TRUE
1	Reaction	DISEASE PROGRESSION	23	46236	6413	0.61733	0.41049	0.9284	0.01679	0.35865	TRUE
1	Reaction	EMBOLISM	23	4622	6413	6.20323	4.12099	9.33757	0	0.35865	TRUE
1	Reaction	ENDOCRINE DISORDER	23	597	6413	49.7015	32.7846	75.3475	0	0.35865	TRUE
1	Reaction	ILEUS	23	6061	6413	4.72485	3.13962	7.11047	0	0.35865	TRUE
1	Reaction	LYMPHADENOPATHY	23	16159	6413	1.76801	1.1754	2.6594	0.01131	0.35865	TRUE
1	Reaction	MUSCLE SPASMS	23	83751	6413	0.34073	0.22658	0.5124	0	0.35865	TRUE
1	Reaction	SKIN DISORDER	23	12517	6413	2.28339	1.5179	3.43491	0.00037	0.35865	TRUE
1	Reaction	BRAIN OEDEMA	22	6175	6413	4.43495	2.92009	6.73569	0	0.34305	TRUE
1	Reaction	CARDIAC FAILURE	22	35489	6413	0.7694	0.50691	1.16782	0.2592	0.34305	FALSE
1	Reaction	CLOSTRIDIUM DIFFICILE COLITIS	22	4626	6413	5.92708	3.90156	9.00415	0	0.34305	TRUE
1	Reaction	HAEMOGLOBIN DECREASED	22	51476	6413	0.53034	0.34942	0.80494	0.00133	0.34305	TRUE
1	Reaction	MYOSITIS	22	3748	6413	7.32374	4.8198	11.1285	0	0.34305	TRUE
1	Reaction	SMALL INTESTINAL OBSTRUCTION	22	5441	6413	5.03566	3.31528	7.64881	0	0.34305	TRUE
1	Reaction	C-REACTIVE PROTEIN INCREASED	21	13447	6413	1.94011	1.26542	2.97452	0.00528	0.32746	TRUE
1	Reaction	ENCEPHALITIS	21	2751	6413	9.54135	6.21512	14.6477	0	0.32746	TRUE
1	Reaction	ENTEROCOLITIS HAEMORRHAGIC	21	808	6413	33.0977	21.4727	51.0164	0	0.32746	TRUE
1	Reaction	HYPOXIA	21	14660	6413	1.77935	1.1606	2.72798	0.01241	0.32746	TRUE
1	Reaction	NEUTROPHIL COUNT DECREASED	21	14417	6413	1.80938	1.18018	2.77404	0.01129	0.32746	TRUE
1	Reaction	OEDEMA	21	26255	6413	0.99291	0.64772	1.52205	1	0.32746	FALSE
1	Reaction	Peripheral swelling	21	38657	6413	0.67419	0.43983	1.03342	0.07162	0.32746	FALSE
1	Reaction	TOXICITY TO VARIOUS AGENTS	21	45983	6413	0.56673	0.36973	0.86868	0.00629	0.32746	TRUE
1	Reaction	VISUAL IMPAIRMENT	21	40525	6413	0.64309	0.41955	0.98576	0.04271	0.32746	TRUE
1	Reaction	DRUG-INDUCED LIVER INJURY	20	6447	6413	3.85989	2.49022	5.9829	0	0.31187	TRUE
1	Reaction	GUILLAIN-BARRE SYNDROME	20	1970	6413	12.7218	8.1947	19.7499	0	0.31187	TRUE
1	Reaction	MENTAL STATUS CHANGES	20	15561	6413	1.59626	1.03025	2.47325	0.04555	0.31187	TRUE
1	Reaction	CONJUNCTIVITIS	19	5190	6413	4.55756	2.90657	7.14635	0	0.29627	TRUE
1	Reaction	HYPERHIDROSIS	19	63369	6413	0.37201	0.23743	0.58288	0	0.29627	TRUE
1	Reaction	HYPERKALAEMIA	19	15461	6413	1.52617	0.97385	2.39175	0.08546	0.29627	FALSE
1	Reaction	METASTASES TO LUNG	19	4340	6413	5.45409	3.47776	8.55352	0	0.29627	TRUE
1	Reaction	PERIPHERAL SENSORY NEUROPATHY	19	2332	6413	10.189	6.49138	15.9928	0	0.29627	TRUE
1	Reaction	TACHYCARDIA	19	39218	6413	0.60122	0.3837	0.94205	0.02502	0.29627	TRUE
1	Reaction	ASCITES	18	14005	6413	1.59625	1.00605	2.53269	0.0516	0.28068	FALSE
1	Reaction	Clostridium difficile infection	18	6320	6413	3.54281	2.23208	5.62323	1e-05	0.28068	TRUE
1	Reaction	GASTROENTERITIS	18	7037	6413	3.1809	2.0042	5.04847	3e-05	0.28068	TRUE
1	Reaction	HYPERCALCAEMIA	18	5321	6413	4.21021	2.65223	6.68339	0	0.28068	TRUE
1	Reaction	HYPOPHOSPHATAEMIA	18	2939	6413	7.64353	4.81198	12.1413	0	0.28068	TRUE
1	Reaction	LUNG DISORDER	18	19962	6413	1.11947	0.70562	1.77605	0.61565	0.28068	FALSE
1	Reaction	RENAL IMPAIRMENT	18	30153	6413	0.74089	0.46703	1.17535	0.22246	0.28068	FALSE
1	Reaction	BLOOD LACTATE DEHYDROGENASE INCREASED	17	10358	6413	2.03911	1.26792	3.27934	0.00772	0.26509	TRUE
1	Reaction	DIVERTICULITIS	17	10742	6413	1.9661	1.22254	3.16188	0.0094	0.26509	TRUE
1	Reaction	DYSGEUSIA	17	38684	6413	0.54533	0.33919	0.87677	0.00883	0.26509	TRUE
1	Reaction	EOSINOPHILIA	17	6629	6413	3.18911	1.98256	5.12993	4e-05	0.26509	TRUE
1	Reaction	GAMMA-GLUTAMYLTRANSFERASE INCREASED	17	13518	6413	1.56184	0.97125	2.51156	0.06793	0.26509	FALSE
1	Reaction	OPTIC NEURITIS	17	4942	6413	4.2815	2.66111	6.88857	0	0.26509	TRUE
1	Reaction	PERITONITIS	17	12704	6413	1.66205	1.03354	2.67275	0.04096	0.26509	TRUE
1	Reaction	Seizure	17	25843	6413	0.81648	0.50781	1.31277	0.50832	0.26509	FALSE
1	Reaction	TREMOR	17	81152	6413	0.25989	0.16166	0.41782	0	0.26509	TRUE
1	Reaction	URTICARIA	17	65597	6413	0.32154	0.2	0.51693	0	0.26509	TRUE
1	Reaction	VISUAL ACUITY REDUCED	17	25817	6413	0.8173	0.50832	1.3141	0.50816	0.26509	FALSE
1	Reaction	ABDOMINAL DISCOMFORT	16	57474	6413	0.3454	0.21172	0.5635	0	0.24949	TRUE
1	Reaction	BLOOD THYROID STIMULATING HORMONE INCREASED	16	3189	6413	6.25465	3.82938	10.2159	0	0.24949	TRUE
1	Reaction	COMA	16	21922	6413	0.90596	0.55526	1.47818	0.81129	0.24949	FALSE
1	Reaction	GASTROINTESTINAL PERFORATION	16	2040	6413	9.80534	5.99907	16.0266	0	0.24949	TRUE
1	Reaction	HERPES ZOSTER	16	22793	6413	0.87132	0.53403	1.42164	0.72471	0.24949	FALSE
1	Reaction	Immune thrombocytopenic purpura	16	1345	6413	14.933	9.12706	24.4324	0	0.24949	TRUE
1	Reaction	JAUNDICE	16	16246	6413	1.2228	0.7494	1.99525	0.40367	0.24949	FALSE
1	Reaction	METASTASES TO LIVER	16	6957	6413	2.85924	1.75173	4.66697	0.00024	0.24949	TRUE
1	Reaction	RHABDOMYOLYSIS	16	20861	6413	0.95208	0.58351	1.55343	1	0.24949	FALSE
1	Reaction	SARCOIDOSIS	16	2049	6413	9.76193	5.97256	15.9555	0	0.24949	TRUE
1	Reaction	BLOOD PRESSURE INCREASED	15	64593	6413	0.28811	0.17378	0.47765	0	0.2339	TRUE
1	Reaction	CHOLECYSTITIS	15	6558	6413	2.84359	1.71431	4.71678	0.00039	0.2339	TRUE
1	Reaction	DISSEMINATED INTRAVASCULAR COAGULATION	15	8420	6413	2.21364	1.3347	3.67138	0.00542	0.2339	TRUE
1	Reaction	HYPOCALCAEMIA	15	8022	6413	2.32367	1.40101	3.85395	0.00433	0.2339	TRUE
1	Reaction	LOSS OF CONSCIOUSNESS	15	64076	6413	0.29044	0.17519	0.48151	0	0.2339	TRUE
1	Reaction	NIGHT SWEATS	15	13184	6413	1.41284	0.852	2.34284	0.1663	0.2339	FALSE
1	Reaction	OROPHARYNGEAL PAIN	15	36281	6413	0.51303	0.30944	0.85058	0.00528	0.2339	TRUE
1	Reaction	SINUSITIS	15	42459	6413	0.43836	0.2644	0.72676	0.0004	0.2339	TRUE
1	Reaction	WHITE BLOOD CELL COUNT INCREASED	15	21523	6413	0.86506	0.52173	1.43432	0.71704	0.2339	FALSE
1	Reaction	ACUTE HEPATIC FAILURE	14	5431	6413	3.2057	1.89836	5.41334	0.00019	0.21831	TRUE
1	Reaction	ADRENOCORTICAL INSUFFICIENCY ACUTE	14	595	6413	29.8886	17.6007	50.7553	0	0.21831	TRUE
1	Reaction	BLOOD GLUCOSE INCREASED	14	96809	6413	0.1794	0.10631	0.30276	0	0.21831	TRUE
1	Reaction	CHROMATURIA	14	11405	6413	1.52447	0.90309	2.5734	0.13224	0.21831	FALSE
1	Reaction	DELIRIUM	14	14437	6413	1.204	0.71329	2.03229	0.46034	0.21831	FALSE
1	Reaction	ENCEPHALOPATHY	14	10511	6413	1.65431	0.97998	2.79265	0.08062	0.21831	FALSE
1	Reaction	INTESTINAL OBSTRUCTION	14	14310	6413	1.21469	0.71963	2.05034	0.45766	0.21831	FALSE
1	Reaction	MENINGITIS ASEPTIC	14	1714	6413	10.2149	6.04015	17.275	0	0.21831	TRUE
1	Reaction	MUCOSAL INFLAMMATION	14	10848	6413	1.60285	0.9495	2.70575	0.08663	0.21831	FALSE
1	Reaction	NEOPLASM	14	4792	6413	3.63442	2.15205	6.13786	5e-05	0.21831	TRUE
1	Reaction	PERICARDIAL EFFUSION	14	10008	6413	1.73757	1.02928	2.93326	0.04894	0.21831	TRUE
1	Reaction	PULMONARY OEDEMA	14	21845	6413	0.79544	0.47129	1.34255	0.47275	0.21831	FALSE
1	Reaction	Pneumocystis jirovecii pneumonia	14	2196	6413	7.95841	4.70813	13.4526	0	0.21831	TRUE
1	Reaction	Product use issue	14	62976	6413	0.27581	0.16343	0.46545	0	0.21831	TRUE
1	Reaction	SKIN DISCOLOURATION	14	19255	6413	0.90251	0.53471	1.5233	0.79965	0.21831	FALSE
1	Reaction	THROMBOSIS	14	38265	6413	0.45398	0.269	0.76618	0.00108	0.21831	TRUE
1	Reaction	TUMOUR HAEMORRHAGE	14	1116	6413	15.7579	9.30698	26.6803	0	0.21831	TRUE
1	Reaction	BRONCHITIS	13	36079	6413	0.44709	0.25972	0.76964	0.00145	0.20271	TRUE
1	Reaction	DIPLOPIA	13	12115	6413	1.33241	0.77387	2.2941	0.26249	0.20271	FALSE
1	Reaction	FAILURE TO THRIVE	13	3215	6413	5.03588	2.92247	8.67761	0	0.20271	TRUE
1	Reaction	HAEMATURIA	13	17114	6413	0.94292	0.5477	1.62334	1	0.20271	FALSE
1	Reaction	HYPOGLYCAEMIA	13	25092	6413	0.64296	0.37349	1.10686	0.11793	0.20271	FALSE
1	Reaction	HYPOTHALAMO-PITUITARY DISORDER	13	466	6413	35.5958	20.5204	61.7463	0	0.20271	TRUE
1	Reaction	LEUKOCYTOSIS	13	8781	6413	1.83906	1.06801	3.16677	0.03567	0.20271	TRUE
1	Reaction	NASOPHARYNGITIS	13	67912	6413	0.23748	0.13796	0.40879	0	0.20271	TRUE
1	Reaction	NERVOUS SYSTEM DISORDER	13	21102	6413	0.76461	0.44414	1.31631	0.39457	0.20271	FALSE
1	Reaction	OVERDOSE	13	64504	6413	0.25003	0.14525	0.43039	0	0.20271	TRUE
1	Reaction	TUMOUR LYSIS SYNDROME	13	2853	6413	5.67778	3.29452	9.78507	0	0.20271	TRUE
1	Reaction	VIITH NERVE PARALYSIS	13	3678	6413	4.3997	2.55363	7.58031	1e-05	0.20271	TRUE
1	Reaction	ADVERSE DRUG REACTION	12	24883	6413	0.59847	0.34001	1.05341	0.07282	0.18712	FALSE
1	Reaction	ANXIETY	12	129403	6413	0.11504	0.06536	0.20246	0	0.18712	TRUE
1	Reaction	APHASIA	12	14657	6413	1.01635	0.57736	1.78913	0.88381	0.18712	FALSE
1	Reaction	BALANCE DISORDER	12	40220	6413	0.37019	0.21032	0.65156	7e-05	0.18712	TRUE
1	Reaction	CYSTITIS	12	14476	6413	1.02907	0.58459	1.81152	0.88274	0.18712	FALSE
1	Reaction	DRY MOUTH	12	36573	6413	0.40711	0.2313	0.71656	0.00042	0.18712	TRUE
1	Reaction	ELECTROLYTE IMBALANCE	12	4651	6413	3.20856	1.82179	5.65097	0.00052	0.18712	TRUE
1	Reaction	GASTROINTESTINAL TOXICITY	12	1350	6413	11.1244	6.30497	19.6279	0	0.18712	TRUE
1	Reaction	INAPPROPRIATE ANTIDIURETIC HORMONE SECRETION	12	4373	6413	3.4131	1.93783	6.01148	0.0003	0.18712	TRUE
1	Reaction	LOWER RESPIRATORY TRACT INFECTION	12	13471	6413	1.10591	0.62823	1.94682	0.6481	0.18712	FALSE
1	Reaction	Liver function test increased	12	2374	6413	6.30165	3.57549	11.1064	0	0.18712	TRUE
1	Reaction	MENINGITIS	12	3206	6413	4.66015	2.64511	8.21025	2e-05	0.18712	TRUE
1	Reaction	Multiple organ dysfunction syndrome	12	3383	6413	4.41546	2.50636	7.77872	3e-05	0.18712	TRUE
1	Reaction	RASH ERYTHEMATOUS	12	17448	6413	0.85367	0.48496	1.50268	0.68872	0.18712	FALSE
1	Reaction	RASH MACULAR	12	12068	6413	1.23461	0.70132	2.17344	0.42026	0.18712	FALSE
1	Reaction	SINUS TACHYCARDIA	12	7436	6413	2.00492	1.13868	3.53013	0.02226	0.18712	TRUE
1	Reaction	SURGERY	12	20902	6413	0.71252	0.40479	1.25419	0.27219	0.18712	FALSE
1	Reaction	THERAPEUTIC RESPONSE DECREASED	12	25836	6413	0.57638	0.32746	1.01453	0.0603	0.18712	FALSE
1	Reaction	VERTIGO	12	27119	6413	0.5491	0.31196	0.9665	0.03144	0.18712	TRUE
1	Reaction	WHITE BLOOD CELL COUNT DECREASED	12	42540	6413	0.34999	0.19885	0.61601	2e-05	0.18712	TRUE
1	Reaction	ACUTE MYOCARDIAL INFARCTION	11	18242	6413	0.7484	0.4146	1.35097	0.43094	0.17153	FALSE
1	Reaction	ALOPECIA	11	60378	6413	0.22602	0.12523	0.40794	0	0.17153	TRUE
1	Reaction	BLINDNESS	11	16703	6413	0.81741	0.45282	1.47555	0.58608	0.17153	FALSE
1	Reaction	BLOOD CORTISOL DECREASED	11	701	6413	19.7741	10.905	35.8565	0	0.17153	TRUE
1	Reaction	BLOOD SODIUM DECREASED	11	9567	6413	1.42781	0.79084	2.5778	0.20732	0.17153	FALSE
1	Reaction	COLECTOMY	11	2190	6413	6.26165	3.46426	11.3179	0	0.17153	TRUE
1	Reaction	DEAFNESS	11	10435	6413	1.30892	0.72501	2.36308	0.38269	0.17153	FALSE
1	Reaction	DRY SKIN	11	22794	6413	0.59887	0.33177	1.08101	0.09978	0.17153	FALSE
1	Reaction	FEBRILE NEUTROPENIA	11	24262	6413	0.56262	0.31169	1.01556	0.05306	0.17153	FALSE
1	Reaction	HAEMOPTYSIS	11	13119	6413	1.0409	0.57659	1.87909	0.87668	0.17153	FALSE
1	Reaction	HAEMORRHAGE	11	47597	6413	0.28673	0.15886	0.51752	0	0.17153	TRUE
1	Reaction	HAEMORRHAGE INTRACRANIAL	11	7945	6413	1.7197	0.95245	3.10501	0.07349	0.17153	FALSE
1	Reaction	HOSPITALISATION	11	41233	6413	0.33099	0.18338	0.59742	2e-05	0.17153	TRUE
1	Reaction	HYPOPHAGIA	11	10597	6413	1.28888	0.71392	2.32691	0.3871	0.17153	FALSE
1	Reaction	IMMUNE SYSTEM DISORDER	11	4974	6413	2.74917	1.52225	4.96498	0.00285	0.17153	TRUE
1	Reaction	INFLUENZA	11	36645	6413	0.37244	0.20634	0.67225	0.00019	0.17153	TRUE
1	Reaction	LOWER GASTROINTESTINAL HAEMORRHAGE	11	3797	6413	3.60384	1.99508	6.50983	0.00034	0.17153	TRUE
1	Reaction	LUNG INFILTRATION	11	6495	6413	2.10428	1.16534	3.79972	0.02365	0.17153	TRUE
1	Reaction	MUSCULOSKELETAL PAIN	11	30382	6413	0.44925	0.24889	0.81089	0.00425	0.17153	TRUE
1	Reaction	OCULAR HYPERAEMIA	11	16292	6413	0.83804	0.46424	1.5128	0.67786	0.17153	FALSE
1	Reaction	PERIPHERAL MOTOR NEUROPATHY	11	647	6413	21.453	11.8262	38.9163	0	0.17153	TRUE
1	Reaction	SKIN INFECTION	11	3850	6413	3.55408	1.96756	6.41988	0.00038	0.17153	TRUE
1	Reaction	SUDDEN DEATH	11	7176	6413	1.90428	1.05463	3.43841	0.05494	0.17153	FALSE
1	Reaction	SWELLING	11	33663	6413	0.40545	0.22463	0.73183	0.00071	0.17153	TRUE
1	Reaction	THYROID DISORDER	11	6468	6413	2.11308	1.17021	3.81562	0.02328	0.17153	TRUE
1	Reaction	WOUND INFECTION	11	3888	6413	3.51925	1.94829	6.3569	0.00041	0.17153	TRUE
1	Reaction	ACUTE RESPIRATORY DISTRESS SYNDROME	10	8205	6413	1.51358	0.81446	2.81279	0.17158	0.15593	FALSE
1	Reaction	ACUTE RESPIRATORY FAILURE	10	6904	6413	1.79921	0.9681	3.34384	0.08201	0.15593	FALSE
1	Reaction	AMNESIA	10	33736	6413	0.36778	0.19796	0.68328	0.00033	0.15593	TRUE
1	Reaction	ARRHYTHMIA	10	24398	6413	0.5086	0.27375	0.94493	0.02357	0.15593	TRUE
1	Reaction	AUTOIMMUNE PANCREATITIS	10	116	6413	117.017	61.2151	223.685	0	0.15593	TRUE
1	Reaction	AUTOIMMUNE THYROIDITIS	10	1312	6413	9.52669	5.11613	17.7396	0	0.15593	TRUE
1	Reaction	BASEDOW'S DISEASE	10	1155	6413	10.833	5.81575	20.1786	0	0.15593	TRUE
1	Reaction	BLOOD CREATINE PHOSPHOKINASE INCREASED	10	18243	6413	0.68029	0.36614	1.26397	0.293	0.15593	FALSE
1	Reaction	BLOOD TESTOSTERONE DECREASED	10	4790	6413	2.59493	1.39597	4.82365	0.00638	0.15593	TRUE
1	Reaction	CARDIOMYOPATHY	10	8125	6413	1.5285	0.82249	2.84053	0.16783	0.15593	FALSE
1	Reaction	CONDITION AGGRAVATED	10	89912	6413	0.13797	0.07427	0.25631	0	0.15593	TRUE
1	Reaction	DISORIENTATION	10	22101	6413	0.56148	0.30221	1.0432	0.07307	0.15593	FALSE
1	Reaction	ENTEROCOLITIS INFECTIOUS	10	602	6413	20.9523	11.2201	39.126	0	0.15593	TRUE
1	Reaction	HAEMOLYTIC ANAEMIA	10	4711	6413	2.63854	1.41941	4.90476	0.00571	0.15593	TRUE
1	Reaction	HAEMORRHOIDS	10	9523	6413	1.30387	0.70166	2.42296	0.36318	0.15593	FALSE
1	Reaction	HEPATOMEGALY	10	5828	6413	2.13196	1.14704	3.96259	0.03108	0.15593	TRUE
1	Reaction	HYPERURICAEMIA	10	2060	6413	6.05061	3.25218	11.257	1e-05	0.15593	TRUE
1	Reaction	INFLAMMATION	10	17032	6413	0.72869	0.39219	1.35391	0.41467	0.15593	FALSE
1	Reaction	MELAENA	10	10764	6413	1.15341	0.62071	2.14327	0.60741	0.15593	FALSE
1	Reaction	MYOPATHY	10	4086	6413	3.04312	1.63689	5.65741	0.00214	0.15593	TRUE
1	Reaction	OESOPHAGITIS	10	5774	6413	2.15194	1.15778	3.99974	0.0303	0.15593	TRUE
1	Reaction	ORGANISING PNEUMONIA	10	1531	6413	8.155	4.38098	15.1802	0	0.15593	TRUE
1	Reaction	PITUITARY ENLARGEMENT	10	104	6413	131.955	68.7845	253.14	0	0.15593	TRUE
1	Reaction	POLYARTHRITIS	10	1693	6413	7.37003	3.96006	13.7163	0	0.15593	TRUE
1	Reaction	RHEUMATOID ARTHRITIS	10	35355	6413	0.35093	0.18889	0.65198	0.00011	0.15593	TRUE
1	Reaction	STAPHYLOCOCCAL INFECTION	10	18353	6413	0.67621	0.36395	1.25639	0.2417	0.15593	FALSE
1	Reaction	THYROID FUNCTION TEST ABNORMAL	10	2257	6413	5.52014	2.96745	10.2687	2e-05	0.15593	TRUE
1	Reaction	TUMOUR PAIN	10	420	6413	30.2531	16.1635	56.6243	0	0.15593	TRUE
1	Reaction	UPPER GASTROINTESTINAL HAEMORRHAGE	10	7700	6413	1.61297	0.86793	2.99758	0.15177	0.15593	FALSE
1	Reaction	UPPER RESPIRATORY TRACT INFECTION	10	19487	6413	0.63684	0.34276	1.18323	0.16457	0.15593	FALSE
1	Reaction	VIRAL INFECTION	10	13985	6413	0.88757	0.47768	1.64917	0.88085	0.15593	FALSE
1	Reaction	WHEEZING	10	19150	6413	0.64805	0.3488	1.20407	0.20053	0.15593	FALSE
1	Reaction	AGRANULOCYTOSIS	9	6811	6413	1.64119	0.85395	3.15418	0.13112	0.14034	FALSE
1	Reaction	CARDIO-RESPIRATORY ARREST	9	24123	6413	0.46294	0.24095	0.88945	0.01609	0.14034	TRUE
1	Reaction	CHOLELITHIASIS	9	19137	6413	0.58361	0.30375	1.12133	0.12344	0.14034	FALSE
1	Reaction	DRUG ERUPTION	9	7594	6413	1.47177	0.76583	2.82845	0.22172	0.14034	FALSE
1	Reaction	EPILEPSY	9	12113	6413	0.92229	0.47998	1.7722	1	0.14034	FALSE
1	Reaction	EPISTAXIS	9	33301	6413	0.33532	0.17453	0.64422	0.00014	0.14034	TRUE
1	Reaction	ERYSIPELAS	9	2070	6413	5.41649	2.81552	10.4202	6e-05	0.14034	TRUE
1	Reaction	EXTRAVASATION	9	2266	6413	4.94611	2.57134	9.51414	0.00012	0.14034	TRUE
1	Reaction	FLATULENCE	9	25020	6413	0.44634	0.23231	0.85754	0.00969	0.14034	TRUE
1	Reaction	Facial paralysis	9	1415	6413	7.93982	4.12442	15.2847	0	0.14034	TRUE
1	Reaction	Fulminant type 1 diabetes mellitus	9	67	6413	192.472	95.4099	388.277	0	0.14034	TRUE
1	Reaction	HEART RATE INCREASED	9	44877	6413	0.2488	0.12951	0.478	0	0.14034	TRUE
1	Reaction	HISTIOCYTOSIS HAEMATOPHAGIC	9	2528	6413	4.43167	2.3042	8.52342	0.00027	0.14034	TRUE
1	Reaction	HOT FLUSH	9	28226	6413	0.39563	0.20592	0.7601	0.0021	0.14034	TRUE
1	Reaction	HYPERBILIRUBINAEMIA	9	4405	6413	2.53944	1.32102	4.88167	0.01066	0.14034	TRUE
1	Reaction	HYPERPYREXIA	9	1318	6413	8.52817	4.42937	16.4199	0	0.14034	TRUE
1	Reaction	MYASTHENIA GRAVIS	9	1629	6413	6.89098	3.58058	13.262	1e-05	0.14034	TRUE
1	Reaction	NEPHRITIS	9	1156	6413	9.73268	5.05337	18.7449	0	0.14034	TRUE
1	Reaction	PACKED RED BLOOD CELL TRANSFUSION	9	777	6413	14.5357	7.53765	28.0307	0	0.14034	TRUE
1	Reaction	SKIN TOXICITY	9	1630	6413	6.88672	3.57838	13.2538	1e-05	0.14034	TRUE
1	Reaction	SUPRAVENTRICULAR TACHYCARDIA	9	5146	6413	2.17313	1.13057	4.1771	0.02592	0.14034	TRUE
1	Reaction	TOXIC SKIN ERUPTION	9	4499	6413	2.48628	1.29338	4.7794	0.01208	0.14034	TRUE
1	Reaction	ACUTE FEBRILE NEUTROPHILIC DERMATOSIS	8	924	6413	10.833	5.40347	21.7181	0	0.12475	TRUE
1	Reaction	BLOOD CORTICOTROPHIN DECREASED	8	162	6413	64.4351	31.6692	131.102	0	0.12475	TRUE
1	Reaction	BONE PAIN	8	26233	6413	0.37838	0.18929	0.75637	0.00208	0.12475	TRUE
1	Reaction	CARDIAC FAILURE CONGESTIVE	8	58893	6413	0.16851	0.08431	0.33684	0	0.12475	TRUE
1	Reaction	CHEST DISCOMFORT	8	42857	6413	0.23158	0.11585	0.46291	0	0.12475	TRUE
1	Reaction	CHOLANGITIS	8	2273	6413	4.38102	2.18918	8.76737	0.00062	0.12475	TRUE
1	Reaction	COAGULOPATHY	8	9243	6413	1.0745	0.53742	2.14832	0.71462	0.12475	FALSE
1	Reaction	CYTOKINE RELEASE SYNDROME	8	465	6413	21.7134	10.7979	43.6631	0	0.12475	TRUE
1	Reaction	Chronic kidney disease	8	4069	6413	2.44349	1.22166	4.88731	0.01902	0.12475	TRUE
1	Reaction	DEPRESSED LEVEL OF CONSCIOUSNESS	8	18667	6413	0.53181	0.26603	1.06312	0.0698	0.12475	FALSE
1	Reaction	DIABETES INSIPIDUS	8	1031	6413	9.69991	4.83982	19.4404	0	0.12475	TRUE
1	Reaction	EYE DISORDER	8	13270	6413	0.74823	0.37427	1.49585	0.53809	0.12475	FALSE
1	Reaction	EYE PAIN	8	19585	6413	0.50687	0.25356	1.01326	0.05652	0.12475	FALSE
1	Reaction	FEELING COLD	8	12953	6413	0.76655	0.38343	1.53249	0.63925	0.12475	FALSE
1	Reaction	FLUSHING	8	58352	6413	0.17008	0.08509	0.33996	0	0.12475	TRUE
1	Reaction	GASTRIC HAEMORRHAGE	8	6265	6413	1.5859	0.79309	3.17126	0.17692	0.12475	FALSE
1	Reaction	GASTROINTESTINAL NECROSIS	8	1640	6413	6.08027	3.03685	12.1737	7e-05	0.12475	TRUE
1	Reaction	GENERALISED OEDEMA	8	6240	6413	1.59227	0.79627	3.18399	0.17544	0.12475	FALSE
1	Reaction	GROIN PAIN	8	4190	6413	2.37279	1.18634	4.7458	0.02214	0.12475	TRUE
1	Reaction	HAEMOLYSIS	8	3872	6413	2.56807	1.2839	5.13666	0.01463	0.12475	TRUE
1	Reaction	INTRACRANIAL TUMOUR HAEMORRHAGE	8	181	6413	57.3584	28.2456	116.478	0	0.12475	TRUE
1	Reaction	IRIDOCYCLITIS	8	894	6413	11.1998	5.58586	22.4558	0	0.12475	TRUE
1	Reaction	LOCAL SWELLING	8	19238	6413	0.51602	0.25813	1.03155	0.05543	0.12475	FALSE
1	Reaction	LYMPHOEDEMA	8	2531	6413	3.93302	1.96556	7.86984	0.00123	0.12475	TRUE
1	Reaction	LYMPHOPENIA	8	4868	6413	2.04177	1.02093	4.08336	0.06623	0.12475	FALSE
1	Reaction	MALNUTRITION	8	5243	6413	1.89551	0.94784	3.7907	0.08003	0.12475	FALSE
1	Reaction	METASTASES TO BONE	8	5624	6413	1.76692	0.88357	3.5334	0.0997	0.12475	FALSE
1	Reaction	MUSCULOSKELETAL STIFFNESS	8	33529	6413	0.29602	0.14809	0.59173	4e-05	0.12475	TRUE
1	Reaction	NECK PAIN	8	24676	6413	0.40226	0.20123	0.80412	0.00462	0.12475	TRUE
1	Reaction	ORAL PAIN	8	10228	6413	0.97094	0.48564	1.94121	1	0.12475	FALSE
1	Reaction	PEMPHIGOID	8	1923	6413	5.18173	2.58871	10.3721	0.00021	0.12475	TRUE
1	Reaction	PERICARDITIS	8	3796	6413	2.61959	1.30964	5.23979	0.01315	0.12475	TRUE
1	Reaction	POLYNEUROPATHY	8	3693	6413	2.69281	1.34622	5.38636	0.01132	0.12475	TRUE
1	Reaction	PRESYNCOPE	8	10517	6413	0.94424	0.47229	1.88781	1	0.12475	FALSE
1	Reaction	PRURITUS GENERALISED	8	16499	6413	0.60172	0.301	1.20291	0.1686	0.12475	FALSE
1	Reaction	PYELONEPHRITIS	8	3661	6413	2.7164	1.358	5.43358	0.01079	0.12475	TRUE
1	Reaction	Prescribed underdose	8	3555	6413	2.79758	1.39856	5.59608	0.00917	0.12475	TRUE
1	Reaction	RESPIRATORY DISTRESS	8	13758	6413	0.72167	0.36099	1.44275	0.45058	0.12475	FALSE
1	Reaction	SECONDARY ADRENOCORTICAL INSUFFICIENCY	8	295	6413	34.5749	17.1329	69.7738	0	0.12475	TRUE
1	Reaction	SKIN EXFOLIATION	8	19280	6413	0.51489	0.25757	1.0293	0.0555	0.12475	FALSE
1	Reaction	SLEEP DISORDER	8	24756	6413	0.40096	0.20058	0.80152	0.00466	0.12475	TRUE
1	Reaction	STEVENS-JOHNSON SYNDROME	8	13313	6413	0.74581	0.37306	1.49101	0.53844	0.12475	FALSE
1	Reaction	TRI-IODOTHYRONINE FREE DECREASED	8	74	6413	150.349	72.2118	313.033	0	0.12475	TRUE
1	Reaction	VENTRICULAR TACHYCARDIA	8	8608	6413	1.15384	0.57709	2.307	0.5703	0.12475	FALSE
1	Reaction	WEIGHT INCREASED	8	93623	6413	0.106	0.05303	0.21187	0	0.12475	TRUE
1	Reaction	ABDOMINAL SEPSIS	7	413	6413	21.3858	10.1346	45.1276	0	0.10915	TRUE
1	Reaction	ANAPHYLACTIC REACTION	7	20562	6413	0.42241	0.20143	0.88581	0.01335	0.10915	TRUE
1	Reaction	ATELECTASIS	7	6205	6413	1.40088	0.66783	2.93857	0.36206	0.10915	FALSE
1	Reaction	ATRIAL FLUTTER	7	4073	6413	2.13542	1.01778	4.48038	0.0496	0.10915	TRUE
1	Reaction	Autoimmune haemolytic anaemia	7	767	6413	11.4245	5.43006	24.0365	0	0.10915	TRUE
1	Reaction	BACTERAEMIA	7	4471	6413	1.94503	0.92709	4.08069	0.10049	0.10915	FALSE
1	Reaction	BLOOD POTASSIUM DECREASED	7	14401	6413	0.60321	0.28763	1.26503	0.23601	0.10915	FALSE
1	Reaction	BONE MARROW FAILURE	7	10233	6413	0.84907	0.40484	1.78078	0.86078	0.10915	FALSE
1	Reaction	CARDIOPULMONARY FAILURE	7	2361	6413	3.68846	1.75716	7.74243	0.00344	0.10915	TRUE
1	Reaction	COGNITIVE DISORDER	7	19295	6413	0.45016	0.21466	0.94401	0.02932	0.10915	TRUE
1	Reaction	CYTOLYTIC HEPATITIS	7	3634	6413	2.39389	1.14088	5.02306	0.02989	0.10915	TRUE
1	Reaction	CYTOMEGALOVIRUS COLITIS	7	551	6413	15.9607	7.57589	33.6257	0	0.10915	TRUE
1	Reaction	DERMATOMYOSITIS	7	867	6413	10.0961	4.80055	21.2331	1e-05	0.10915	TRUE
1	Reaction	DRUG DOSE OMISSION	7	123668	6413	0.07021	0.03349	0.14723	0	0.10915	TRUE
1	Reaction	DRUG INTERACTION	7	70743	6413	0.12275	0.05854	0.25738	0	0.10915	TRUE
1	Reaction	DYSPEPSIA	7	43861	6413	0.19799	0.09442	0.41517	0	0.10915	TRUE
1	Reaction	DYSPNOEA EXERTIONAL	7	12692	6413	0.68448	0.32638	1.4355	0.43032	0.10915	FALSE
1	Reaction	Drug reaction with eosinophilia and systemic symptoms	7	6783	6413	1.28138	0.61088	2.68781	0.51383	0.10915	FALSE
1	Reaction	FEELING ABNORMAL	7	113480	6413	0.07652	0.03649	0.16044	0	0.10915	TRUE
1	Reaction	FREQUENT BOWEL MOVEMENTS	7	7768	6413	1.11875	0.53338	2.34657	0.68684	0.10915	FALSE
1	Reaction	HAEMATEMESIS	7	13017	6413	0.66738	0.31822	1.39963	0.35249	0.10915	FALSE
1	Reaction	HYPOMAGNESAEMIA	7	5117	6413	1.69914	0.80995	3.56455	0.13979	0.10915	FALSE
1	Reaction	ILEUS PARALYTIC	7	2310	6413	3.77014	1.79603	7.91408	0.00306	0.10915	TRUE
1	Reaction	IRRITABILITY	7	32837	6413	0.26447	0.12612	0.55459	1e-05	0.10915	TRUE
1	Reaction	LARGE INTESTINAL HAEMORRHAGE	7	990	6413	8.83279	4.20145	18.5693	2e-05	0.10915	TRUE
1	Reaction	LARGE INTESTINAL ULCER	7	1211	6413	7.21149	3.43191	15.1535	7e-05	0.10915	TRUE
1	Reaction	MEGACOLON	7	727	6413	12.0592	5.73065	25.3766	0	0.10915	TRUE
1	Reaction	METABOLIC ACIDOSIS	7	12094	6413	0.71834	0.34252	1.50654	0.51819	0.10915	FALSE
1	Reaction	METASTASIS	7	3050	6413	2.85331	1.35964	5.98788	0.01297	0.10915	TRUE
1	Reaction	NEUROLOGICAL SYMPTOM	7	2669	6413	3.26169	1.55405	6.84574	0.00659	0.10915	TRUE
1	Reaction	PALPITATIONS	7	53232	6413	0.16313	0.0778	0.34207	0	0.10915	TRUE
1	Reaction	PANCREATITIS ACUTE	7	10199	6413	0.85191	0.40619	1.78672	0.86067	0.10915	FALSE
1	Reaction	PAPILLOEDEMA	7	2190	6413	3.97738	1.89464	8.34963	0.00228	0.10915	TRUE
1	Reaction	PHOTOSENSITIVITY REACTION	7	7067	6413	1.22983	0.58632	2.57965	0.52501	0.10915	FALSE
1	Reaction	PNEUMONIA ASPIRATION	7	10464	6413	0.83032	0.3959	1.74143	0.86182	0.10915	FALSE
1	Reaction	RESPIRATORY ARREST	7	18738	6413	0.46354	0.22104	0.97209	0.0375	0.10915	TRUE
1	Reaction	SJOGREN'S SYNDROME	7	1851	6413	4.70858	2.24247	9.88678	0.00089	0.10915	TRUE
1	Reaction	SQUAMOUS CELL CARCINOMA	7	4087	6413	2.1281	1.01429	4.465	0.05034	0.10915	FALSE
1	Reaction	SWELLING FACE	7	29629	6413	0.29311	0.13978	0.61465	0.00012	0.10915	TRUE
1	Reaction	URINARY RETENTION	7	14654	6413	0.59279	0.28266	1.24318	0.18884	0.10915	FALSE
1	Reaction	UROSEPSIS	7	3885	6413	2.23895	1.06708	4.69773	0.04036	0.10915	TRUE
1	Reaction	ABASIA	6	26321	6413	0.28281	0.12709	0.62934	0.00019	0.09356	TRUE
1	Reaction	ABDOMINAL ABSCESS	6	1918	6413	3.89239	1.74713	8.67175	0.0051	0.09356	TRUE
1	Reaction	AGEUSIA	6	11044	6413	0.67424	0.30295	1.50056	0.40292	0.09356	FALSE
1	Reaction	ATAXIA	6	5991	6413	1.24348	0.55863	2.76796	0.49341	0.09356	FALSE
1	Reaction	Adrenocorticotropic hormone deficiency	6	35	6413	256.629	106.583	617.912	0	0.09356	TRUE
1	Reaction	BLINDNESS UNILATERAL	6	6702	6413	1.11145	0.49933	2.47394	0.66692	0.09356	FALSE
1	Reaction	BLISTER	6	21928	6413	0.33949	0.15256	0.75547	0.00263	0.09356	TRUE
1	Reaction	BODY TEMPERATURE INCREASED	6	10156	6413	0.73323	0.32945	1.63187	0.59747	0.09356	FALSE
1	Reaction	CAPILLARY LEAK SYNDROME	6	722	6413	10.3942	4.65578	23.2055	3e-05	0.09356	TRUE
1	Reaction	CHRONIC OBSTRUCTIVE PULMONARY DISEASE	6	24539	6413	0.30336	0.13632	0.67506	0.00063	0.09356	TRUE
1	Reaction	CLOSTRIDIAL INFECTION	6	3094	6413	2.41006	1.08229	5.36673	0.04142	0.09356	TRUE
1	Reaction	CLOSTRIDIUM TEST POSITIVE	6	747	6413	10.0435	4.49921	22.42	4e-05	0.09356	TRUE
1	Reaction	COLITIS MICROSCOPIC	6	1044	6413	7.1698	3.21483	15.9903	0.00024	0.09356	TRUE
1	Reaction	DRUG INTOLERANCE	6	23056	6413	0.32287	0.14509	0.7185	0.0015	0.09356	TRUE
1	Reaction	DYSARTHRIA	6	19129	6413	0.38918	0.17488	0.86606	0.01043	0.09356	TRUE
1	Reaction	EATING DISORDER	6	9050	6413	0.82289	0.36973	1.83149	0.85173	0.09356	FALSE
1	Reaction	EXTRAOCULAR MUSCLE DISORDER	6	188	6413	40.8915	18.1386	92.1855	0	0.09356	TRUE
1	Reaction	FACE OEDEMA	6	8889	6413	0.83781	0.37643	1.86469	0.85113	0.09356	FALSE
1	Reaction	GENERAL PHYSICAL CONDITION ABNORMAL	6	2454	6413	3.04014	1.36497	6.77118	0.01568	0.09356	TRUE
1	Reaction	GRANULOMA	6	1746	6413	4.27716	1.9196	9.53014	0.00325	0.09356	TRUE
1	Reaction	HAEMODIALYSIS	6	7742	6413	0.96203	0.43222	2.14125	1	0.09356	FALSE
1	Reaction	HALLUCINATION	6	30454	6413	0.24443	0.10984	0.54391	2e-05	0.09356	TRUE
1	Reaction	HEPATIC LESION	6	1867	6413	3.99906	1.79495	8.90971	0.00449	0.09356	TRUE
1	Reaction	INAPPROPRIATE SCHEDULE OF DRUG ADMINISTRATION	6	53385	6413	0.13942	0.06266	0.31024	0	0.09356	TRUE
1	Reaction	INTERNATIONAL NORMALISED RATIO INCREASED	6	21381	6413	0.34818	0.15646	0.7748	0.00348	0.09356	TRUE
1	Reaction	INTUSSUSCEPTION	6	348	6413	21.761	9.71173	48.7596	0	0.09356	TRUE
1	Reaction	LEUKODERMA	6	70	6413	116.285	50.3788	268.412	0	0.09356	TRUE
1	Reaction	LIVER INJURY	6	6166	6413	1.20816	0.54276	2.68929	0.64771	0.09356	FALSE
1	Reaction	MATERNAL EXPOSURE DURING PREGNANCY	6	19272	6413	0.38629	0.17359	0.85963	0.01047	0.09356	TRUE
1	Reaction	MEMORY IMPAIRMENT	6	56611	6413	0.13148	0.05909	0.29256	0	0.09356	TRUE
1	Reaction	MENINGORADICULITIS	6	42	6413	206.729	87.1367	490.459	0	0.09356	TRUE
1	Reaction	METASTASES TO MENINGES	6	686	6413	10.9445	4.9014	24.4383	2e-05	0.09356	TRUE
1	Reaction	MYELITIS	6	560	6413	13.4337	6.01135	30.0205	1e-05	0.09356	TRUE
1	Reaction	NEURALGIA	6	8871	6413	0.83951	0.37719	1.86848	0.85108	0.09356	FALSE
1	Reaction	ORTHOSTATIC HYPOTENSION	6	7516	6413	0.99098	0.44523	2.20571	1	0.09356	FALSE
1	Reaction	PRODUCTIVE COUGH	6	15106	6413	0.49286	0.22147	1.09684	0.0832	0.09356	FALSE
1	Reaction	PSEUDOMEMBRANOUS COLITIS	6	1300	6413	5.75136	2.58	12.821	0.00075	0.09356	TRUE
1	Reaction	RED BLOOD CELL COUNT DECREASED	6	11980	6413	0.62153	0.27928	1.38324	0.32975	0.09356	FALSE
1	Reaction	RENAL TUBULAR NECROSIS	6	4312	6413	1.72835	0.77632	3.84785	0.16971	0.09356	FALSE
1	Reaction	SHOCK	6	11126	6413	0.66927	0.30072	1.48949	0.40307	0.09356	FALSE
1	Reaction	SKIN ULCER	6	11017	6413	0.67589	0.3037	1.50424	0.49726	0.09356	FALSE
1	Reaction	SPINAL CORD COMPRESSION	6	1815	6413	4.11402	1.84648	9.16616	0.00392	0.09356	TRUE
1	Reaction	SPLENOMEGALY	6	5372	6413	1.38693	0.62304	3.0874	0.33802	0.09356	FALSE
1	Reaction	TEMPORAL ARTERITIS	6	667	6413	11.2591	5.04177	25.1433	2e-05	0.09356	TRUE
1	Reaction	THYROXINE FREE DECREASED	6	184	6413	41.8104	18.5408	94.2846	0	0.09356	TRUE
1	Reaction	TINNITUS	6	21112	6413	0.35261	0.15845	0.78468	0.00472	0.09356	TRUE
1	Reaction	VASCULITIS	6	5474	6413	1.36106	0.61142	3.02979	0.46543	0.09356	FALSE
1	Reaction	ABDOMINAL PAIN LOWER	5	12496	6413	0.49651	0.20669	1.1927	0.15111	0.07797	FALSE
1	Reaction	ACIDOSIS	5	3983	6413	1.55904	0.64877	3.74649	0.26115	0.07797	FALSE
1	Reaction	ACNE	5	13731	6413	0.45183	0.1881	1.08537	0.06949	0.07797	FALSE
1	Reaction	ACTIVATED PARTIAL THROMBOPLASTIN TIME PROLONGED	5	3712	6413	1.67302	0.69617	4.02054	0.23317	0.07797	FALSE
1	Reaction	ADRENAL DISORDER	5	796	6413	7.84055	3.2555	18.8832	0.00053	0.07797	TRUE
1	Reaction	ANGINA PECTORIS	5	16601	6413	0.3737	0.15557	0.89764	0.0186	0.07797	TRUE
1	Reaction	ANGINA UNSTABLE	5	4911	6413	1.26414	0.52611	3.03751	0.60698	0.07797	FALSE
1	Reaction	ARTHROPATHY	5	21035	6413	0.29491	0.12278	0.70836	0.00138	0.07797	TRUE
1	Reaction	ASTHMA	5	33594	6413	0.18464	0.07687	0.44349	0	0.07797	TRUE
1	Reaction	BLOOD ALBUMIN DECREASED	5	4898	6413	1.2675	0.5275	3.04558	0.6065	0.07797	FALSE
1	Reaction	BLOOD PRESSURE DECREASED	5	31060	6413	0.19971	0.08314	0.47968	0	0.07797	TRUE
1	Reaction	CACHEXIA	5	2395	6413	2.59493	1.07944	6.23808	0.0464	0.07797	TRUE
1	Reaction	CEREBRAL ISCHAEMIA	5	3459	6413	1.79556	0.74713	4.31523	0.21163	0.07797	FALSE
1	Reaction	CONTUSION	5	41712	6413	0.1487	0.06191	0.35716	0	0.07797	TRUE
1	Reaction	CYTOMEGALOVIRUS INFECTION	5	5907	6413	1.05081	0.43736	2.52472	0.81663	0.07797	FALSE
1	Reaction	DEMYELINATING POLYNEUROPATHY	5	504	6413	12.4286	5.15219	29.9815	6e-05	0.07797	TRUE
1	Reaction	DISEASE RECURRENCE	5	10341	6413	0.60003	0.24978	1.44142	0.29953	0.07797	FALSE
1	Reaction	DRUG ADMINISTRATION ERROR	5	27826	6413	0.22292	0.09281	0.53544	2e-05	0.07797	TRUE
1	Reaction	DUODENAL ULCER	5	3711	6413	1.67347	0.69636	4.02163	0.23308	0.07797	FALSE
1	Reaction	DYSSTASIA	5	13538	6413	0.45828	0.19078	1.10085	0.09183	0.07797	FALSE
1	Reaction	DYSURIA	5	17906	6413	0.34645	0.14423	0.8322	0.00787	0.07797	TRUE
1	Reaction	EJECTION FRACTION DECREASED	5	6392	6413	0.97102	0.40416	2.33294	1	0.07797	FALSE
1	Reaction	ELECTROCARDIOGRAM QT PROLONGED	5	13250	6413	0.46824	0.19493	1.12479	0.08995	0.07797	FALSE
1	Reaction	EOSINOPHIL COUNT INCREASED	5	3066	6413	2.0261	0.84299	4.86965	0.10471	0.07797	FALSE
1	Reaction	EPSTEIN-BARR VIRUS INFECTION	5	2270	6413	2.73814	1.13896	6.58268	0.03842	0.07797	TRUE
1	Reaction	ERYTHEMA NODOSUM	5	1397	6413	4.45537	1.85214	10.7175	0.00594	0.07797	TRUE
1	Reaction	EYELID PTOSIS	5	4484	6413	1.38466	0.57624	3.32722	0.42016	0.07797	FALSE
1	Reaction	GASTROINTESTINAL INFECTION	5	3456	6413	1.79712	0.74778	4.31898	0.21141	0.07797	FALSE
1	Reaction	GOUT	5	7783	6413	0.79736	0.3319	1.9156	0.84018	0.07797	FALSE
1	Reaction	HAEMATOCRIT DECREASED	5	12336	6413	0.50295	0.20937	1.20817	0.14926	0.07797	FALSE
1	Reaction	HEARING IMPAIRED	5	6387	6413	0.97178	0.40447	2.33476	1	0.07797	FALSE
1	Reaction	HEPATITIS CHOLESTATIC	5	2754	6413	2.25605	0.93859	5.42278	0.0744	0.07797	FALSE
1	Reaction	HIATUS HERNIA	5	7077	6413	0.87696	0.36502	2.1069	1	0.07797	FALSE
1	Reaction	INJECTION SITE REACTION	5	34020	6413	0.18233	0.07591	0.43793	0	0.07797	TRUE
1	Reaction	IRITIS	5	1418	6413	4.38916	1.82465	10.558	0.00631	0.07797	TRUE
1	Reaction	ISCHAEMIC STROKE	5	8226	6413	0.75439	0.31402	1.81235	0.69648	0.07797	FALSE
1	Reaction	Immune-mediated adverse reaction	5	38	6413	187.936	73.3921	481.248	0	0.07797	TRUE
1	Reaction	KETOACIDOSIS	5	3445	6413	1.80287	0.75017	4.3328	0.21059	0.07797	FALSE
1	Reaction	LEUKOENCEPHALOPATHY	5	1984	6413	3.13384	1.30337	7.53504	0.02352	0.07797	TRUE
1	Reaction	LICHENOID KERATOSIS	5	741	6413	8.42646	3.49806	20.2985	0.00038	0.07797	TRUE
1	Reaction	LOCALISED OEDEMA	5	2340	6413	2.65605	1.10485	6.38515	0.04278	0.07797	TRUE
1	Reaction	LUNG NEOPLASM	5	3472	6413	1.78883	0.74433	4.29904	0.21262	0.07797	FALSE
1	Reaction	METASTASES TO LYMPH NODES	5	2625	6413	2.36713	0.98476	5.69	0.06348	0.07797	FALSE
1	Reaction	MIGRAINE	5	34443	6413	0.18009	0.07498	0.43255	0	0.07797	TRUE
1	Reaction	NEPHRITIS AUTOIMMUNE	5	27	6413	281.904	106.786	744.197	0	0.07797	TRUE
1	Reaction	NON-CARDIAC CHEST PAIN	5	2156	6413	2.88325	1.19926	6.9319	0.03193	0.07797	TRUE
1	Reaction	ORAL HERPES	5	6549	6413	0.94772	0.39446	2.27695	1	0.07797	FALSE
1	Reaction	OXYGEN SATURATION DECREASED	5	18049	6413	0.34371	0.14309	0.8256	0.00796	0.07797	TRUE
1	Reaction	PARALYSIS	5	7185	6413	0.86377	0.35953	2.07519	1	0.07797	FALSE
1	Reaction	PAROPHTHALMIA	5	124	6413	52.1166	21.3074	127.474	0	0.07797	TRUE
1	Reaction	PATHOLOGICAL FRACTURE	5	2516	6413	2.46988	1.02747	5.93722	0.055	0.07797	FALSE
1	Reaction	PLATELET TRANSFUSION	5	348	6413	18.0813	7.48059	43.7041	1e-05	0.07797	TRUE
1	Reaction	POSTERIOR REVERSIBLE ENCEPHALOPATHY SYNDROME	5	3078	6413	2.01818	0.8397	4.85063	0.10598	0.07797	FALSE
1	Reaction	PROCTITIS	5	1044	6413	5.96908	2.48008	14.3665	0.00174	0.07797	TRUE
1	Reaction	PSYCHOTIC DISORDER	5	15442	6413	0.40175	0.16725	0.96505	0.03169	0.07797	TRUE
1	Reaction	RADIATION NECROSIS	5	106	6413	61.4047	25.0243	150.675	0	0.07797	TRUE
1	Reaction	RESPIRATORY TRACT CONGESTION	5	7293	6413	0.85097	0.35421	2.04443	1	0.07797	FALSE
1	Reaction	RETINAL DETACHMENT	5	4187	6413	1.48299	0.61714	3.56364	0.40048	0.07797	FALSE
1	Reaction	RETINOPATHY	5	1768	6413	3.5178	1.46286	8.45937	0.01518	0.07797	TRUE
1	Reaction	RHINORRHOEA	5	21979	6413	0.28224	0.1175	0.67793	0.00076	0.07797	TRUE
1	Reaction	SINUS BRADYCARDIA	5	5015	6413	1.2379	0.51519	2.97442	0.61107	0.07797	FALSE
1	Reaction	SPEECH DISORDER	5	25571	6413	0.24258	0.10099	0.58267	9e-05	0.07797	TRUE
1	Reaction	SUICIDAL IDEATION	5	46607	6413	0.13308	0.05541	0.31964	0	0.07797	TRUE
1	Reaction	THYROTOXIC CRISIS	5	322	6413	19.5643	8.08994	47.3133	1e-05	0.07797	TRUE
1	Reaction	UNRESPONSIVE TO STIMULI	5	12713	6413	0.48803	0.20316	1.17233	0.11569	0.07797	FALSE
1	Reaction	VOGT-KOYANAGI-HARADA SYNDROME	5	90	6413	72.9633	29.6167	179.751	0	0.07797	TRUE
1	Reaction	ABSCESS INTESTINAL	4	1053	6413	4.72975	1.77236	12.6219	0.01101	0.06237	TRUE
1	Reaction	ALTERED STATE OF CONSCIOUSNESS	4	8431	6413	0.58876	0.22099	1.56862	0.43664	0.06237	FALSE
1	Reaction	APLASTIC ANAEMIA	4	2389	6413	2.08029	0.78036	5.54571	0.12941	0.06237	FALSE
1	Reaction	APPENDICITIS	4	3683	6413	1.3486	0.50603	3.5941	0.5493	0.06237	FALSE
1	Reaction	APPETITE DISORDER	4	2201	6413	2.25831	0.84707	6.02069	0.10431	0.06237	FALSE
1	Reaction	ASPIRATION	4	5241	6413	0.94739	0.35554	2.52446	1	0.06237	FALSE
1	Reaction	AUTOIMMUNE ARTHRITIS	4	20	6413	310.094	103.697	927.298	0	0.06237	TRUE
1	Reaction	AUTOIMMUNE NEUROPATHY	4	35	6413	160.048	56.5122	453.274	0	0.06237	TRUE
1	Reaction	Autoimmune dermatitis	4	19	6413	330.767	109.808	996.347	0	0.06237	TRUE
1	Reaction	BLOOD GLUCOSE FLUCTUATION	4	5945	6413	0.83513	0.31343	2.22522	1	0.06237	FALSE
1	Reaction	BLOOD POTASSIUM INCREASED	4	8249	6413	0.60176	0.22586	1.60325	0.43343	0.06237	FALSE
1	Reaction	BRAIN NEOPLASM	4	3811	6413	1.30326	0.48902	3.4732	0.5572	0.06237	FALSE
1	Reaction	BREAST PAIN	4	5514	6413	0.90045	0.33793	2.39934	1	0.06237	FALSE
1	Reaction	CANCER PAIN	4	687	6413	7.26428	2.71939	19.405	0.0025	0.06237	TRUE
1	Reaction	CARDIAC PACEMAKER INSERTION	4	3308	6413	1.50167	0.56343	4.00227	0.34762	0.06237	FALSE
1	Reaction	CARDIOMEGALY	4	8696	6413	0.57081	0.21425	1.52078	0.3421	0.06237	FALSE
1	Reaction	CARDIOTOXICITY	4	2222	6413	2.23693	0.83906	5.96364	0.10699	0.06237	FALSE
1	Reaction	CARDIOVASCULAR DISORDER	4	20461	6413	0.24253	0.09104	0.64608	0.00049	0.06237	TRUE
1	Reaction	CHORIORETINITIS	4	154	6413	33.0767	12.2576	89.2559	1e-05	0.06237	TRUE
1	Reaction	CIRCULATORY COLLAPSE	4	9635	6413	0.51516	0.19336	1.37248	0.20915	0.06237	FALSE
1	Reaction	CROHN'S DISEASE	4	21966	6413	0.22591	0.08481	0.60181	0.00019	0.06237	TRUE
1	Reaction	DEMYELINATION	4	2139	6413	2.32389	0.87165	6.19569	0.09657	0.06237	FALSE
1	Reaction	DEVICE RELATED INFECTION	4	8072	6413	0.61496	0.23082	1.63843	0.4317	0.06237	FALSE
1	Reaction	DIALYSIS	4	8343	6413	0.59498	0.22332	1.58517	0.43491	0.06237	FALSE
1	Reaction	DRUG RESISTANCE	4	6582	6413	0.75426	0.28308	2.00967	0.82593	0.06237	FALSE
1	Reaction	DRY EYE	4	12904	6413	0.38461	0.14437	1.02463	0.04242	0.06237	TRUE
1	Reaction	DUODENITIS	4	1692	6413	2.93928	1.1022	7.83828	0.04955	0.06237	TRUE
1	Reaction	Drug effect incomplete	4	20916	6413	0.23726	0.08906	0.63202	0.00036	0.06237	TRUE
1	Reaction	EAR PAIN	4	8282	6413	0.59936	0.22496	1.59686	0.43391	0.06237	FALSE
1	Reaction	EYE INFLAMMATION	4	2369	6413	2.09789	0.78695	5.59265	0.12663	0.06237	FALSE
1	Reaction	FLUID RETENTION	4	22568	6413	0.21989	0.08254	0.58575	0.00014	0.06237	TRUE
1	Reaction	GASTRIC DISORDER	4	16456	6413	0.30157	0.11321	0.80338	0.0056	0.06237	TRUE
1	Reaction	GASTRIC ULCER HAEMORRHAGE	4	3246	6413	1.53038	0.5742	4.07886	0.34024	0.06237	FALSE
1	Reaction	GASTROINTESTINAL INFLAMMATION	4	2625	6413	1.89298	0.71014	5.04599	0.16403	0.06237	FALSE
1	Reaction	GOITRE	4	2264	6413	2.19536	0.82348	5.85271	0.11246	0.06237	FALSE
1	Reaction	HAEMATOMA	4	13379	6413	0.37095	0.13925	0.98823	0.03201	0.06237	TRUE
1	Reaction	HAIR COLOUR CHANGES	4	2513	6413	1.97748	0.74182	5.27142	0.1472	0.06237	FALSE
1	Reaction	HEMIPARESIS	4	9292	6413	0.53418	0.2005	1.42318	0.26918	0.06237	FALSE
1	Reaction	HEPATITIS ACUTE	4	3112	6413	1.59637	0.59894	4.25483	0.32523	0.06237	FALSE
1	Reaction	HYDRONEPHROSIS	4	3454	6413	1.43812	0.5396	3.8328	0.3659	0.06237	FALSE
1	Reaction	IMPAIRED GASTRIC EMPTYING	4	3145	6413	1.57959	0.59265	4.2101	0.32881	0.06237	FALSE
1	Reaction	INFECTED NEOPLASM	4	46	6413	118.131	42.3717	329.346	0	0.06237	TRUE
1	Reaction	INTRACRANIAL PRESSURE INCREASED	4	2533	6413	1.96184	0.73596	5.2297	0.15015	0.06237	FALSE
1	Reaction	JOINT EFFUSION	4	3204	6413	1.55047	0.58173	4.13242	0.3354	0.06237	FALSE
1	Reaction	JOINT RANGE OF MOTION DECREASED	4	4481	6413	1.10822	0.41587	2.95319	0.78777	0.06237	FALSE
1	Reaction	JOINT SWELLING	4	41346	6413	0.12001	0.04505	0.31968	0	0.06237	TRUE
1	Reaction	KIDNEY FIBROSIS	4	796	6413	6.26452	2.34606	16.7278	0.00422	0.06237	TRUE
1	Reaction	LACRIMATION INCREASED	4	10356	6413	0.47928	0.1799	1.27687	0.1629	0.06237	FALSE
1	Reaction	LEFT VENTRICULAR DYSFUNCTION	4	2801	6413	1.77387	0.66549	4.72825	0.29635	0.06237	FALSE
1	Reaction	LEUKOPENIA	4	21012	6413	0.23617	0.08866	0.62914	0.00036	0.06237	TRUE
1	Reaction	LYMPHOCYTE COUNT INCREASED	4	1259	6413	3.95339	1.48189	10.5469	0.01981	0.06237	TRUE
1	Reaction	LYMPHOCYTOSIS	4	996	6413	5.00151	1.87399	13.3486	0.00913	0.06237	TRUE
1	Reaction	LYMPHOMA	4	7066	6413	0.70256	0.26369	1.8719	0.6725	0.06237	FALSE
1	Reaction	METASTASES TO SKIN	4	318	6413	15.801	5.89528	42.3509	0.00014	0.06237	TRUE
1	Reaction	MOOD ALTERED	4	13097	6413	0.37894	0.14224	1.00952	0.04292	0.06237	TRUE
1	Reaction	MUSCULOSKELETAL CHEST PAIN	4	6998	6413	0.70939	0.26625	1.8901	0.67193	0.06237	FALSE
1	Reaction	NEPHROLITHIASIS	4	17357	6413	0.28592	0.10733	0.76166	0.00433	0.06237	TRUE
1	Reaction	NEPHROTIC SYNDROME	4	3028	6413	1.64071	0.61557	4.37309	0.31655	0.06237	FALSE
1	Reaction	NODULE	4	5226	6413	0.95012	0.35656	2.53172	1	0.06237	FALSE
1	Reaction	NYSTAGMUS	4	2919	6413	1.70206	0.63857	4.53672	0.30621	0.06237	FALSE
1	Reaction	OCULAR ICTERUS	4	2468	6413	2.0136	0.75536	5.36777	0.14064	0.06237	FALSE
1	Reaction	OESOPHAGEAL CANDIDIASIS	4	1688	6413	2.94626	1.10482	7.85692	0.0492	0.06237	TRUE
1	Reaction	ORAL CANDIDIASIS	4	5420	6413	0.91608	0.3438	2.441	1	0.06237	FALSE
1	Reaction	OSTEONECROSIS	4	16978	6413	0.2923	0.10972	0.77867	0.00415	0.06237	TRUE
1	Reaction	PHARYNGITIS	4	5743	6413	0.86452	0.32445	2.30357	1	0.06237	FALSE
1	Reaction	PHOTOPHOBIA	4	7574	6413	0.65542	0.246	1.74625	0.54146	0.06237	FALSE
1	Reaction	PLASMAPHERESIS	4	276	6413	18.2408	6.79907	48.9372	8e-05	0.06237	TRUE
1	Reaction	PNEUMOTHORAX	4	6445	6413	0.7703	0.2891	2.05243	0.82503	0.06237	FALSE
1	Reaction	POLYDIPSIA	4	2150	6413	2.31198	0.86718	6.1639	0.09792	0.06237	FALSE
1	Reaction	PORTAL VEIN THROMBOSIS	4	1603	6413	3.10288	1.16347	8.27509	0.04215	0.06237	TRUE
1	Reaction	PREMATURE DELIVERY	4	3868	6413	1.28403	0.48181	3.42194	0.56104	0.06237	FALSE
1	Reaction	PSEUDOMONAS INFECTION	4	3374	6413	1.47226	0.5524	3.92384	0.35573	0.06237	FALSE
1	Reaction	PSORIASIS	4	45866	6413	0.10818	0.04061	0.28817	0	0.06237	TRUE
1	Reaction	PULMONARY HYPERTENSION	4	10638	6413	0.46657	0.17513	1.243	0.16608	0.06237	FALSE
1	Reaction	Product use in unapproved indication	4	7439	6413	0.66732	0.25046	1.77796	0.5407	0.06237	FALSE
1	Reaction	RADIATION SKIN INJURY	4	684	6413	7.29633	2.73136	19.4908	0.00246	0.06237	TRUE
1	Reaction	SKIN LESION	4	10785	6413	0.46021	0.17274	1.22605	0.12525	0.06237	FALSE
1	Reaction	SKIN MASS	4	2109	6413	2.35701	0.88406	6.28407	0.09292	0.06237	FALSE
1	Reaction	SPINAL COMPRESSION FRACTURE	4	4026	6413	1.23359	0.4629	3.28745	0.57258	0.06237	FALSE
1	Reaction	SUBILEUS	4	1163	6413	4.28085	1.60443	11.4219	0.01531	0.06237	TRUE
1	Reaction	SYSTEMIC INFLAMMATORY RESPONSE SYNDROME	4	1840	6413	2.70234	1.01345	7.20576	0.06333	0.06237	FALSE
1	Reaction	THIRST	4	7503	6413	0.66162	0.24833	1.76278	0.54096	0.06237	FALSE
1	Reaction	THROMBOTIC THROMBOCYTOPENIC PURPURA	4	2257	6413	2.20218	0.82604	5.87091	0.11154	0.06237	FALSE
1	Reaction	TRANSIENT ISCHAEMIC ATTACK	4	20250	6413	0.24506	0.09199	0.65282	0.00068	0.06237	TRUE
1	Reaction	URINE OUTPUT DECREASED	4	4961	6413	1.00091	0.37562	2.66712	0.80439	0.06237	FALSE
1	Reaction	VASCULAR OCCLUSION	4	1216	6413	4.09365	1.53438	10.9216	0.0177	0.06237	TRUE
1	Reaction	VENOUS THROMBOSIS	4	2153	6413	2.30875	0.86597	6.15529	0.09829	0.06237	FALSE
1	Reaction	ABDOMINAL TENDERNESS	3	2675	6413	1.39264	0.44898	4.31966	0.48096	0.04678	FALSE
1	Reaction	ABNORMAL FAECES	3	3007	6413	1.23872	0.39939	3.84198	0.52476	0.04678	FALSE
1	Reaction	ADDISON'S DISEASE	3	374	6413	10.03	3.22093	31.2334	0.00362	0.04678	TRUE
1	Reaction	AGGRESSION	3	28453	6413	0.1308	0.04219	0.40547	0	0.04678	TRUE
1	Reaction	ALANINE AMINOTRANSFERASE ABNORMAL	3	699	6413	5.34645	1.72057	16.6134	0.01957	0.04678	TRUE
1	Reaction	ANAL ABSCESS	3	1604	6413	2.32425	0.74901	7.21239	0.14099	0.04678	FALSE
1	Reaction	ANAL FISTULA	3	2083	6413	1.789	0.57666	5.5501	0.23693	0.04678	FALSE
1	Reaction	ANAPHYLACTIC SHOCK	3	10544	6413	0.35301	0.11386	1.09446	0.05725	0.04678	FALSE
1	Reaction	ANOSMIA	3	7509	6413	0.49575	0.15989	1.53709	0.30434	0.04678	FALSE
1	Reaction	Anal incontinence	3	1300	6413	2.86903	0.92434	8.90509	0.0891	0.04678	FALSE
1	Reaction	BASAL CELL CARCINOMA	3	5972	6413	0.62341	0.20105	1.933	0.64324	0.04678	FALSE
1	Reaction	BILE DUCT OBSTRUCTION	3	1419	6413	2.62791	0.84675	8.15581	0.10832	0.04678	FALSE
1	Reaction	BLOOD CALCIUM INCREASED	3	4699	6413	0.7924	0.25554	2.45719	1	0.04678	FALSE
1	Reaction	BLOOD CORTISOL INCREASED	3	282	6413	13.3374	4.2766	41.595	0.00163	0.04678	TRUE
1	Reaction	BLOOD DISORDER	3	3827	6413	0.9731	0.31378	3.01776	1	0.04678	FALSE
1	Reaction	BLOOD LACTIC ACID INCREASED	3	2067	6413	1.80287	0.58113	5.59316	0.23354	0.04678	FALSE
1	Reaction	BLOOD URIC ACID INCREASED	3	2598	6413	1.43396	0.46229	4.44792	0.47164	0.04678	FALSE
1	Reaction	BRADYCARDIA	3	24140	6413	0.15417	0.04973	0.47792	1e-05	0.04678	TRUE
1	Reaction	BRONCHOPNEUMONIA	3	3737	6413	0.99655	0.32134	3.09053	1	0.04678	FALSE
1	Reaction	CAMPYLOBACTER GASTROENTERITIS	3	165	6413	22.9699	7.3332	71.9491	0.00035	0.04678	TRUE
1	Reaction	CARDIAC DISORDER	3	47871	6413	0.07774	0.02508	0.24098	0	0.04678	TRUE
1	Reaction	CARDIOGENIC SHOCK	3	5331	6413	0.69841	0.22524	2.16563	0.80651	0.04678	FALSE
1	Reaction	CATARACT	3	22214	6413	0.16754	0.05404	0.51937	4e-05	0.04678	TRUE
1	Reaction	CELL DEATH	3	756	6413	4.94174	1.59062	15.353	0.02395	0.04678	TRUE
1	Reaction	CENTRAL NERVOUS SYSTEM HAEMORRHAGE	3	158	6413	24.0073	7.66078	75.2337	0.00031	0.04678	TRUE
1	Reaction	CHEYNE-STOKES RESPIRATION	3	180	6413	21.0233	6.71765	65.7938	0.00045	0.04678	TRUE
1	Reaction	CHORIORETINOPATHY	3	713	6413	5.24102	1.68672	16.285	0.0206	0.04678	TRUE
1	Reaction	CHRONIC LYMPHOCYTIC LEUKAEMIA	3	1749	6413	2.13123	0.68687	6.61284	0.16859	0.04678	FALSE
1	Reaction	COLITIS ISCHAEMIC	3	3349	6413	1.11211	0.35859	3.44909	0.75481	0.04678	FALSE
1	Reaction	COLOSTOMY	3	840	6413	4.44579	1.43131	13.8091	0.03129	0.04678	TRUE
1	Reaction	COMPLETED SUICIDE	3	44602	6413	0.08344	0.02692	0.25864	0	0.04678	TRUE
1	Reaction	CORONARY ARTERY DISEASE	3	24138	6413	0.15418	0.04973	0.47796	1e-05	0.04678	TRUE
1	Reaction	CRANIAL NERVE DISORDER	3	342	6413	10.9768	3.52346	34.1964	0.00282	0.04678	TRUE
1	Reaction	CYANOSIS	3	8830	6413	0.42156	0.13597	1.30701	0.1824	0.04678	FALSE
1	Reaction	CYSTOID MACULAR OEDEMA	3	585	6413	6.39369	2.0566	19.8771	0.01226	0.04678	TRUE
1	Reaction	DECUBITUS ULCER	3	4177	6413	0.8915	0.28748	2.76461	1	0.04678	FALSE
1	Reaction	DEMENTIA	3	9335	6413	0.39875	0.12861	1.23627	0.13841	0.04678	FALSE
1	Reaction	DERMATITIS EXFOLIATIVE	3	4152	6413	0.89687	0.28921	2.78128	1	0.04678	FALSE
1	Reaction	DIABETES MELLITUS INADEQUATE CONTROL	3	8118	6413	0.45855	0.1479	1.42171	0.23478	0.04678	FALSE
1	Reaction	DISORDER OF ORBIT	3	85	6413	45.3796	14.3421	143.584	5e-05	0.04678	TRUE
1	Reaction	DIVERTICULUM	3	4653	6413	0.80024	0.25806	2.48151	1	0.04678	FALSE
1	Reaction	DYSAESTHESIA	3	1382	6413	2.69842	0.86944	8.37491	0.10218	0.04678	FALSE
1	Reaction	ENCEPHALITIS AUTOIMMUNE	3	146	6413	26.0219	8.29609	81.6213	0.00024	0.04678	TRUE
1	Reaction	ENDOCARDITIS	3	2281	6413	1.63351	0.52658	5.06734	0.43847	0.04678	FALSE
1	Reaction	EXTREMITY NECROSIS	3	831	6413	4.49411	1.44684	13.9595	0.03046	0.04678	TRUE
1	Reaction	EYE INFECTION	3	3779	6413	0.98547	0.31777	3.05614	1	0.04678	FALSE
1	Reaction	EYE PRURITUS	3	9199	6413	0.40465	0.13051	1.25456	0.13646	0.04678	FALSE
1	Reaction	EYE SWELLING	3	15597	6413	0.23863	0.07697	0.73977	0.00272	0.04678	TRUE
1	Reaction	FAECES DISCOLOURED	3	10718	6413	0.34728	0.11202	1.07668	0.05795	0.04678	FALSE
1	Reaction	FEELING HOT	3	29298	6413	0.12702	0.04098	0.39377	0	0.04678	TRUE
1	Reaction	FEMALE GENITAL TRACT FISTULA	3	600	6413	6.23304	2.00508	19.3762	0.01311	0.04678	TRUE
1	Reaction	FLANK PAIN	3	4485	6413	0.83024	0.26773	2.57456	1	0.04678	FALSE
1	Reaction	GASTRIC ULCER	3	9789	6413	0.38025	0.12265	1.17891	0.10388	0.04678	FALSE
1	Reaction	GASTROENTERITIS VIRAL	3	7238	6413	0.51432	0.16588	1.59468	0.30233	0.04678	FALSE
1	Reaction	GASTROINTESTINAL ULCER	3	1229	6413	3.03518	0.97779	9.42151	0.07839	0.04678	FALSE
1	Reaction	GASTROOESOPHAGEAL REFLUX DISEASE	3	35837	6413	0.10384	0.0335	0.32191	0	0.04678	TRUE
1	Reaction	GLOMERULONEPHRITIS	3	1112	6413	3.35539	1.08079	10.417	0.06208	0.04678	FALSE
1	Reaction	HAEMORRHAGIC CEREBRAL INFARCTION	3	446	6413	8.39984	2.69944	26.1377	0.00589	0.04678	TRUE
1	Reaction	HEAD INJURY	3	14248	6413	0.26122	0.08426	0.80984	0.00704	0.04678	TRUE
1	Reaction	HEMIPLEGIA	3	4562	6413	0.81622	0.26321	2.53106	1	0.04678	FALSE
1	Reaction	HEPATIC ENZYME ABNORMAL	3	1976	6413	1.88602	0.60791	5.85135	0.21446	0.04678	FALSE
1	Reaction	HEPATIC NECROSIS	3	2595	6413	1.43562	0.46283	4.45307	0.47128	0.04678	FALSE
1	Reaction	HEPATIC STEATOSIS	3	8846	6413	0.4208	0.13572	1.30465	0.1343	0.04678	FALSE
1	Reaction	HEPATORENAL SYNDROME	3	1030	6413	3.6233	1.16695	11.2501	0.05171	0.04678	FALSE
1	Reaction	HORMONE LEVEL ABNORMAL	3	1949	6413	1.91219	0.61634	5.93261	0.20887	0.04678	FALSE
1	Reaction	HYPERNATRAEMIA	3	2261	6413	1.64797	0.53124	5.11225	0.43672	0.04678	FALSE
1	Reaction	HYPERSOMNIA	3	12395	6413	0.30028	0.09686	0.93095	0.02437	0.04678	TRUE
1	Reaction	HYPERTHERMIA	3	3641	6413	1.02285	0.32982	3.17212	0.77096	0.04678	FALSE
1	Reaction	HYPERTRANSAMINASAEMIA	3	710	6413	5.26326	1.69386	16.3543	0.02038	0.04678	TRUE
1	Reaction	HYPOPNOEA	3	1298	6413	2.87346	0.92576	8.91886	0.08879	0.04678	FALSE
1	Reaction	Hypersensitivity vasculitis	3	1113	6413	3.35237	1.07982	10.4076	0.06221	0.04678	FALSE
1	Reaction	INFLAMMATORY BOWEL DISEASE	3	6412	6413	0.58061	0.18726	1.80026	0.50462	0.04678	FALSE
1	Reaction	KIDNEY TRANSPLANT REJECTION	3	2695	6413	1.38229	0.44565	4.28754	0.48345	0.04678	FALSE
1	Reaction	LABORATORY TEST ABNORMAL	3	10274	6413	0.36229	0.11686	1.12323	0.0779	0.04678	FALSE
1	Reaction	LAPAROTOMY	3	269	6413	13.9892	4.48429	43.6408	0.00143	0.04678	TRUE
1	Reaction	LIP SWELLING	3	15022	6413	0.24776	0.07992	0.7681	0.00371	0.04678	TRUE
1	Reaction	MACULAR OEDEMA	3	2625	6413	1.41919	0.45754	4.40208	0.47486	0.04678	FALSE
1	Reaction	MALIGNANT PLEURAL EFFUSION	3	795	6413	4.69839	1.51246	14.5954	0.02723	0.04678	TRUE
1	Reaction	MANIA	3	8867	6413	0.4198	0.1354	1.30156	0.13431	0.04678	FALSE
1	Reaction	MELANOCYTIC NAEVUS	3	1791	6413	2.08117	0.67075	6.45735	0.17686	0.04678	FALSE
1	Reaction	MELANOMA RECURRENT	3	116	6413	32.9303	10.4659	103.613	0.00012	0.04678	TRUE
1	Reaction	METASTASES TO ADRENALS	3	377	6413	9.94954	3.19521	30.9818	0.0037	0.04678	TRUE
1	Reaction	MOBILITY DECREASED	3	28082	6413	0.13252	0.04275	0.41082	0	0.04678	TRUE
1	Reaction	MOUTH HAEMORRHAGE	3	3337	6413	1.11611	0.35988	3.46151	0.7542	0.04678	FALSE
1	Reaction	MOUTH ULCERATION	3	8610	6413	0.43234	0.13944	1.34043	0.1788	0.04678	FALSE
1	Reaction	MOVEMENT DISORDER	3	16587	6413	0.22438	0.07238	0.69561	0.00144	0.04678	TRUE
1	Reaction	MUSCLE TWITCHING	3	11582	6413	0.32137	0.10366	0.99633	0.0318	0.04678	TRUE
1	Reaction	MYASTHENIC SYNDROME	3	179	6413	21.1428	6.75546	66.1712	0.00044	0.04678	TRUE
1	Reaction	MYELITIS TRANSVERSE	3	599	6413	6.2435	2.00843	19.4088	0.01305	0.04678	TRUE
1	Reaction	NASAL CONGESTION	3	21355	6413	0.17428	0.05622	0.54026	8e-05	0.04678	TRUE
1	Reaction	NECK MASS	3	1141	6413	3.26988	1.05329	10.1511	0.06596	0.04678	FALSE
1	Reaction	NEPHROPATHY	3	2757	6413	1.35117	0.43562	4.19096	0.4913	0.04678	FALSE
1	Reaction	NO THERAPEUTIC RESPONSE	3	13302	6413	0.27981	0.09025	0.86745	0.01311	0.04678	TRUE
1	Reaction	NORMOCHROMIC NORMOCYTIC ANAEMIA	3	2010	6413	1.85407	0.59762	5.75214	0.22156	0.04678	FALSE
1	Reaction	OESOPHAGEAL ACHALASIA	3	210	6413	17.9765	5.75201	56.1809	0.0007	0.04678	TRUE
1	Reaction	OPHTHALMOPLEGIA	3	708	6413	5.27819	1.69865	16.4008	0.02023	0.04678	TRUE
1	Reaction	OPTIC NEUROPATHY	3	882	6413	4.23336	1.36305	13.148	0.03536	0.04678	TRUE
1	Reaction	ORAL DISORDER	3	3411	6413	1.09188	0.35207	3.38631	0.75805	0.04678	FALSE
1	Reaction	ORCHITIS	3	445	6413	8.41884	2.70552	26.1971	0.00585	0.04678	TRUE
1	Reaction	OROPHARYNGEAL DISCOMFORT	3	1596	6413	2.33592	0.75277	7.24864	0.13952	0.04678	FALSE
1	Reaction	OSTEOPOROSIS	3	15094	6413	0.24658	0.07954	0.76444	0.00372	0.04678	TRUE
1	Reaction	PAIN OF SKIN	3	5074	6413	0.73381	0.23665	2.27542	0.80468	0.04678	FALSE
1	Reaction	PALMAR-PLANTAR ERYTHRODYSAESTHESIA SYNDROME	3	9098	6413	0.40914	0.13196	1.26849	0.1354	0.04678	FALSE
1	Reaction	PANCREATIC NEOPLASM	3	620	6413	6.031	1.94026	18.7464	0.0143	0.04678	TRUE
1	Reaction	PANIC ATTACK	3	17856	6413	0.20843	0.06723	0.64616	0.00079	0.04678	TRUE
1	Reaction	PAPULE	3	1776	6413	2.09877	0.67642	6.51204	0.17389	0.04678	FALSE
1	Reaction	PARAPLEGIA	3	1385	6413	2.69257	0.86756	8.35671	0.10268	0.04678	FALSE
1	Reaction	PARESIS	3	1205	6413	3.09578	0.99729	9.60989	0.0749	0.04678	FALSE
1	Reaction	PERFORMANCE STATUS DECREASED	3	2622	6413	1.42082	0.45806	4.40713	0.4745	0.04678	FALSE
1	Reaction	PERIODONTITIS	3	1213	6413	3.07531	0.99071	9.54627	0.07606	0.04678	FALSE
1	Reaction	PERIORBITAL OEDEMA	3	2545	6413	1.46386	0.47193	4.54072	0.46547	0.04678	FALSE
1	Reaction	PERIPHERAL ISCHAEMIA	3	2051	6413	1.81696	0.58566	5.63689	0.23017	0.04678	FALSE
1	Reaction	PERIPHERAL SENSORIMOTOR NEUROPATHY	3	462	6413	8.10703	2.60569	25.2233	0.00648	0.04678	TRUE
1	Reaction	PERONEAL NERVE PALSY	3	2989	6413	1.24619	0.40179	3.86516	0.52228	0.04678	FALSE
1	Reaction	PITUITARY HAEMORRHAGE	3	220	6413	17.1481	5.489	53.5718	0.0008	0.04678	TRUE
1	Reaction	PLATELET COUNT INCREASED	3	5580	6413	0.66723	0.21518	2.06891	0.6391	0.04678	FALSE
1	Reaction	PLEURISY	3	3437	6413	1.08361	0.3494	3.36066	0.75944	0.04678	FALSE
1	Reaction	POLLAKIURIA	3	18845	6413	0.19749	0.0637	0.61224	0.00041	0.04678	TRUE
1	Reaction	POLYMYOSITIS	3	910	6413	4.10268	1.32105	12.7413	0.03821	0.04678	TRUE
1	Reaction	POLYP	3	2835	6413	1.31396	0.42363	4.07546	0.50146	0.04678	FALSE
1	Reaction	POLYURIA	3	3567	6413	1.04409	0.33666	3.23802	0.76667	0.04678	FALSE
1	Reaction	PROCTALGIA	3	3063	6413	1.21605	0.39208	3.77163	0.74174	0.04678	FALSE
1	Reaction	PROTEINURIA	3	6881	6413	0.54102	0.17449	1.67747	0.39234	0.04678	FALSE
1	Reaction	PULMONARY FIBROSIS	3	7710	6413	0.48282	0.15572	1.49699	0.30823	0.04678	FALSE
1	Reaction	PULMONARY MASS	3	4877	6413	0.76346	0.24621	2.36742	1	0.04678	FALSE
1	Reaction	RASH PAPULAR	3	9206	6413	0.40434	0.13042	1.2536	0.13654	0.04678	FALSE
1	Reaction	RAYNAUD'S PHENOMENON	3	2176	6413	1.71244	0.552	5.31238	0.25676	0.04678	FALSE
1	Reaction	RED BLOOD CELL SEDIMENTATION RATE INCREASED	3	4420	6413	0.84246	0.27167	2.61246	1	0.04678	FALSE
1	Reaction	RENAL DISORDER	3	20016	6413	0.18594	0.05998	0.57641	0.00015	0.04678	TRUE
1	Reaction	RESTLESSNESS	3	17727	6413	0.20995	0.06772	0.65086	0.00077	0.04678	TRUE
1	Reaction	ROAD TRAFFIC ACCIDENT	3	20355	6413	0.18284	0.05898	0.56681	0.00016	0.04678	TRUE
1	Reaction	SCAR	3	8417	6413	0.44225	0.14264	1.37118	0.17722	0.04678	FALSE
1	Reaction	SENSORY LOSS	3	4050	6413	0.91948	0.2965	2.8514	1	0.04678	FALSE
1	Reaction	SHOCK HAEMORRHAGIC	3	3120	6413	1.19382	0.38492	3.70262	0.74407	0.04678	FALSE
1	Reaction	SLUGGISHNESS	3	4468	6413	0.8334	0.26875	2.58436	1	0.04678	FALSE
1	Reaction	SQUAMOUS CELL CARCINOMA OF SKIN	3	2129	6413	1.75029	0.56419	5.42992	0.24671	0.04678	FALSE
1	Reaction	STATUS EPILEPTICUS	3	4755	6413	0.78307	0.25253	2.42822	1	0.04678	FALSE
1	Reaction	STRESS CARDIOMYOPATHY	3	1793	6413	2.07884	0.67	6.45013	0.17725	0.04678	FALSE
1	Reaction	SYNOVITIS	3	2346	6413	1.58819	0.51198	4.92666	0.44446	0.04678	FALSE
1	Reaction	THERAPEUTIC RESPONSE UNEXPECTED	3	20561	6413	0.18101	0.05839	0.56113	0.00011	0.04678	TRUE
1	Reaction	THROAT TIGHTNESS	3	12429	6413	0.29946	0.09659	0.92841	0.02451	0.04678	TRUE
1	Reaction	THYROXINE FREE INCREASED	3	219	6413	17.2274	5.51421	53.8218	0.00079	0.04678	TRUE
1	Reaction	TOOTH INFECTION	3	5110	6413	0.72863	0.23498	2.25938	0.80482	0.04678	FALSE
1	Reaction	TREATMENT FAILURE	3	8353	6413	0.44564	0.14374	1.38169	0.17704	0.04678	FALSE
1	Reaction	TROPONIN INCREASED	3	2874	6413	1.29611	0.41788	4.02007	0.50665	0.04678	FALSE
1	Reaction	TYPE 2 DIABETES MELLITUS	3	19756	6413	0.18838	0.06077	0.584	0.00021	0.04678	TRUE
1	Reaction	Therapy change	3	1551	6413	2.40383	0.77463	7.45959	0.13132	0.04678	FALSE
1	Reaction	URINE OUTPUT INCREASED	3	1389	6413	2.6848	0.86506	8.33256	0.10333	0.04678	FALSE
1	Reaction	VASOGENIC CEREBRAL OEDEMA	3	186	6413	20.334	6.49943	63.6168	0.00049	0.04678	TRUE
1	Reaction	VENTRICULAR ARRHYTHMIA	3	1527	6413	2.44168	0.78681	7.5772	0.12702	0.04678	FALSE
1	Reaction	VIRAL UPPER RESPIRATORY TRACT INFECTION	3	3973	6413	0.93731	0.30225	2.90673	1	0.04678	FALSE
1	Reaction	VOLVULUS	3	789	6413	4.73426	1.52398	14.707	0.02671	0.04678	TRUE
1	Reaction	WOUND SECRETION	3	2275	6413	1.63782	0.52797	5.08073	0.43794	0.04678	FALSE
1	Reaction	ABDOMINAL INFECTION	2	986	6413	2.52109	0.62975	10.0927	0.18912	0.03119	FALSE
1	Reaction	ABDOMINAL OPERATION	2	480	6413	5.18986	1.29446	20.8075	0.05794	0.03119	FALSE
1	Reaction	ABORTION INDUCED	2	6350	6413	0.39079	0.09773	1.5626	0.2606	0.03119	FALSE
1	Reaction	ACTIVITIES OF DAILY LIVING IMPAIRED	2	21192	6413	0.11707	0.02928	0.46805	1e-05	0.03119	TRUE
1	Reaction	ADRENAL HAEMORRHAGE	2	259	6413	9.65273	2.40162	38.7968	0.01891	0.03119	TRUE
1	Reaction	AMPUTATION	2	537	6413	4.63692	1.15691	18.5849	0.07043	0.03119	FALSE
1	Reaction	ARACHNOIDITIS	2	428	6413	5.82336	1.45196	23.3557	0.04732	0.03119	TRUE
1	Reaction	ARTERIAL OCCLUSIVE DISEASE	2	4657	6413	0.53292	0.13327	2.13108	0.59933	0.03119	FALSE
1	Reaction	ARTERIAL THROMBOSIS	2	1170	6413	2.12393	0.53066	8.50086	0.24309	0.03119	FALSE
1	Reaction	ASPIRATION PLEURAL CAVITY	2	414	6413	6.02124	1.50113	24.152	0.0446	0.03119	TRUE
1	Reaction	ASTHENOPIA	2	2356	6413	1.05385	0.26346	4.21541	0.71552	0.03119	FALSE
1	Reaction	AUTOIMMUNE NEUTROPENIA	2	89	6413	28.5144	7.02063	115.811	0.00243	0.03119	TRUE
1	Reaction	AUTOIMMUNE THROMBOCYTOPENIA	2	477	6413	5.22263	1.30262	20.9394	0.05731	0.03119	FALSE
1	Reaction	AUTONOMIC NERVOUS SYSTEM IMBALANCE	2	1161	6413	2.14042	0.53478	8.56695	0.24043	0.03119	FALSE
1	Reaction	AUTONOMIC NEUROPATHY	2	444	6413	5.61256	1.39956	22.5076	0.05051	0.03119	FALSE
1	Reaction	Adenocarcinoma of colon	2	575	6413	4.32941	1.08037	17.3495	0.07919	0.03119	FALSE
1	Reaction	Aphthous ulcer	2	1034	6413	2.40383	0.6005	9.62264	0.20307	0.03119	FALSE
1	Reaction	Atypical pneumonia	2	967	6413	2.57073	0.64213	10.2917	0.18363	0.03119	FALSE
1	Reaction	BACTERIAL SEPSIS	2	1580	6413	1.57209	0.3929	6.29021	0.36355	0.03119	FALSE
1	Reaction	BENIGN PROSTATIC HYPERPLASIA	2	2960	6413	0.83866	0.20969	3.35425	1	0.03119	FALSE
1	Reaction	BICYTOPENIA	2	403	6413	6.18641	1.54217	24.8168	0.0425	0.03119	TRUE
1	Reaction	BILE DUCT STENOSIS	2	594	6413	4.19046	1.04577	16.7913	0.08369	0.03119	FALSE
1	Reaction	BIOPSY	2	443	6413	5.62529	1.40273	22.5588	0.05031	0.03119	FALSE
1	Reaction	BLADDER DISORDER	2	4848	6413	0.51192	0.12802	2.04706	0.60476	0.03119	FALSE
1	Reaction	BLAST CELL PROLIFERATION	2	41	6413	63.609	15.3627	263.372	0.00052	0.03119	TRUE
1	Reaction	BLINDNESS TRANSIENT	2	3340	6413	0.74318	0.18583	2.97225	1	0.03119	FALSE
1	Reaction	BLOOD AMYLASE INCREASED	2	1919	6413	1.29408	0.32347	5.17705	0.67046	0.03119	FALSE
1	Reaction	BLOOD CHLORIDE DECREASED	2	1936	6413	1.2827	0.32063	5.13151	0.67206	0.03119	FALSE
1	Reaction	BLOOD FOLLICLE STIMULATING HORMONE DECREASED	2	101	6413	25.0581	6.18145	101.579	0.00311	0.03119	TRUE
1	Reaction	BLOOD GLUCOSE ABNORMAL	2	7352	6413	0.33752	0.08441	1.34954	0.14387	0.03119	FALSE
1	Reaction	BLOOD GLUCOSE DECREASED	2	26258	6413	0.09448	0.02363	0.37773	0	0.03119	TRUE
1	Reaction	BLOOD PRESSURE SYSTOLIC INCREASED	2	6898	6413	0.35974	0.08997	1.4384	0.1951	0.03119	FALSE
1	Reaction	BLOOD PROLACTIN DECREASED	2	76	6413	33.5237	8.2312	136.534	0.00178	0.03119	TRUE
1	Reaction	BLOOD THYROID STIMULATING HORMONE ABNORMAL	2	651	6413	3.82242	0.95412	15.3134	0.09763	0.03119	FALSE
1	Reaction	BLOOD UREA INCREASED	2	11612	6413	0.21367	0.05344	0.8543	0.00826	0.03119	TRUE
1	Reaction	BLOOD URINE PRESENT	2	9264	6413	0.26784	0.06699	1.0709	0.04144	0.03119	TRUE
1	Reaction	BRAIN INJURY	2	3555	6413	0.69821	0.17459	2.79232	1	0.03119	FALSE
1	Reaction	BRAIN OPERATION	2	778	6413	3.19684	0.79825	12.8028	0.13072	0.03119	FALSE
1	Reaction	BRONCHOPULMONARY ASPERGILLOSIS	2	2543	6413	0.97629	0.24408	3.90502	1	0.03119	FALSE
1	Reaction	BURNING SENSATION	2	33341	6413	0.07441	0.01861	0.29748	0	0.03119	TRUE
1	Reaction	CAESAREAN SECTION	2	8826	6413	0.28114	0.07031	1.12407	0.05705	0.03119	FALSE
1	Reaction	CATARACT OPERATION	2	3318	6413	0.74812	0.18706	2.99197	1	0.03119	FALSE
1	Reaction	CATATONIA	2	2118	6413	1.17238	0.29307	4.68986	0.69018	0.03119	FALSE
1	Reaction	CENTRAL NERVOUS SYSTEM NECROSIS	2	144	6413	17.4701	4.32776	70.5224	0.00619	0.03119	TRUE
1	Reaction	CEREBRAL INFARCTION	2	12695	6413	0.19544	0.04888	0.7814	0.00432	0.03119	TRUE
1	Reaction	CEREBRAL THROMBOSIS	2	1635	6413	1.51914	0.37968	6.07817	0.37928	0.03119	FALSE
1	Reaction	CHOLECYSTITIS ACUTE	2	3152	6413	0.78754	0.19691	3.14971	1	0.03119	FALSE
1	Reaction	CIRCUMSTANCE OR INFORMATION CAPABLE OF LEADING TO MEDICATION ERROR	2	8064	6413	0.30771	0.07696	1.23033	0.07665	0.03119	FALSE
1	Reaction	COLD SWEAT	2	8753	6413	0.28348	0.0709	1.13345	0.05665	0.03119	FALSE
1	Reaction	COLON CANCER	2	6014	6413	0.41263	0.10319	1.64995	0.25565	0.03119	FALSE
1	Reaction	CONDUCTION DISORDER	2	985	6413	2.52365	0.63039	10.103	0.18883	0.03119	FALSE
1	Reaction	COORDINATION ABNORMAL	2	9048	6413	0.27424	0.06859	1.09648	0.05899	0.03119	FALSE
1	Reaction	CSF PROTEIN INCREASED	2	594	6413	4.19046	1.04577	16.7913	0.08369	0.03119	FALSE
1	Reaction	CYSTITIS NONINFECTIVE	2	510	6413	4.88337	1.21823	19.5754	0.06441	0.03119	FALSE
1	Reaction	Cancer surgery	2	321	6413	7.77665	1.93687	31.2237	0.02813	0.03119	TRUE
1	Reaction	Candida infection	2	4220	6413	0.58813	0.14707	2.35194	0.78125	0.03119	FALSE
1	Reaction	DEAFNESS UNILATERAL	2	2703	6413	0.91846	0.22963	3.67358	1	0.03119	FALSE
1	Reaction	DELUSION	2	6730	6413	0.36872	0.09221	1.47433	0.19209	0.03119	FALSE
1	Reaction	DEPRESSED MOOD	2	21069	6413	0.11776	0.02945	0.47078	1e-05	0.03119	TRUE
1	Reaction	DEPRESSIVE SYMPTOM	2	1357	6413	1.83081	0.4575	7.32648	0.29848	0.03119	FALSE
1	Reaction	DERMATITIS ACNEIFORM	2	2526	6413	0.98287	0.24572	3.93133	1	0.03119	FALSE
1	Reaction	DERMATITIS BULLOUS	2	3345	6413	0.74207	0.18555	2.9678	1	0.03119	FALSE
1	Reaction	DIABETIC COMA	2	2112	6413	1.17571	0.29391	4.7032	0.68956	0.03119	FALSE
1	Reaction	DIASTOLIC HYPOTENSION	2	58	6413	44.2991	10.8126	181.492	0.00104	0.03119	TRUE
1	Reaction	DIZZINESS POSTURAL	2	3326	6413	0.74632	0.18661	2.98477	1	0.03119	FALSE
1	Reaction	DRAIN REMOVAL	2	35	6413	75.1743	18.0421	313.221	0.00038	0.03119	TRUE
1	Reaction	DRUG TOLERANCE DECREASED	2	567	6413	4.39071	1.09563	17.5957	0.07732	0.03119	FALSE
1	Reaction	DYSPHONIA	2	23687	6413	0.10474	0.0262	0.41874	0	0.03119	TRUE
1	Reaction	EAR DISORDER	2	1996	6413	1.24411	0.31099	4.977	0.67786	0.03119	FALSE
1	Reaction	EAR INFECTION	2	9209	6413	0.26944	0.06739	1.0773	0.04126	0.03119	TRUE
1	Reaction	EASTERN COOPERATIVE ONCOLOGY GROUP PERFORMANCE STATUS WORSENED	2	126	6413	20.0061	4.94901	80.8732	0.00478	0.03119	TRUE
1	Reaction	ECZEMA	2	8174	6413	0.30357	0.07592	1.21377	0.07691	0.03119	FALSE
1	Reaction	ELECTROCARDIOGRAM ABNORMAL	2	4493	6413	0.55238	0.13813	2.20893	0.59636	0.03119	FALSE
1	Reaction	EMBOLIC STROKE	2	1783	6413	1.3929	0.34816	5.57269	0.65834	0.03119	FALSE
1	Reaction	EMPHYSEMA	2	5474	6413	0.45335	0.11338	1.81282	0.34119	0.03119	FALSE
1	Reaction	ENCEPHALITIS BRAIN STEM	2	56	6413	45.9398	11.203	188.384	0.00097	0.03119	TRUE
1	Reaction	ENTEROCOCCAL SEPSIS	2	434	6413	5.74248	1.43186	23.0303	0.04851	0.03119	TRUE
1	Reaction	ERUCTATION	2	7368	6413	0.33678	0.08423	1.34661	0.14413	0.03119	FALSE
1	Reaction	ERYTHEMA MULTIFORME	2	4804	6413	0.51661	0.12919	2.06583	0.60333	0.03119	FALSE
1	Reaction	ESCHERICHIA SEPSIS	2	1460	6413	1.70148	0.42521	6.80841	0.32875	0.03119	FALSE
1	Reaction	EXFOLIATIVE RASH	2	1314	6413	1.89082	0.47248	7.56686	0.28576	0.03119	FALSE
1	Reaction	FACIAL PARESIS	2	1888	6413	1.31535	0.32879	5.26221	0.66758	0.03119	FALSE
1	Reaction	FEEDING DISORDER	2	4310	6413	0.57585	0.144	2.30279	0.59508	0.03119	FALSE
1	Reaction	FEMORAL NECK FRACTURE	2	2356	6413	1.05385	0.26346	4.21541	0.71552	0.03119	FALSE
1	Reaction	FEMUR FRACTURE	2	18902	6413	0.13126	0.03283	0.52476	5e-05	0.03119	TRUE
1	Reaction	FISTULA	2	4774	6413	0.51986	0.13	2.07882	0.60242	0.03119	FALSE
1	Reaction	FULL BLOOD COUNT DECREASED	2	6307	6413	0.39346	0.0984	1.57326	0.25959	0.03119	FALSE
1	Reaction	FUNCTIONAL GASTROINTESTINAL DISORDER	2	1299	6413	1.91268	0.47794	7.65446	0.28132	0.03119	FALSE
1	Reaction	FUNGAL INFECTION	2	13918	6413	0.17827	0.04459	0.71272	0.00231	0.03119	TRUE
1	Reaction	FUNGAL SEPSIS	2	414	6413	6.02124	1.50113	24.152	0.0446	0.03119	TRUE
1	Reaction	FUNGAL SKIN INFECTION	2	1430	6413	1.73722	0.43414	6.95159	0.31997	0.03119	FALSE
1	Reaction	Faeces soft	2	1166	6413	2.13123	0.53248	8.53011	0.24191	0.03119	FALSE
1	Reaction	GASTRITIS EROSIVE	2	2629	6413	0.94433	0.23609	3.77711	1	0.03119	FALSE
1	Reaction	GASTRITIS HAEMORRHAGIC	2	807	6413	3.08168	0.76954	12.3408	0.1386	0.03119	FALSE
1	Reaction	GASTROINTESTINAL OBSTRUCTION	2	789	6413	3.15216	0.78711	12.6235	0.1337	0.03119	FALSE
1	Reaction	GASTROINTESTINAL STOMA COMPLICATION	2	639	6413	3.89443	0.97206	15.6026	0.09464	0.03119	FALSE
1	Reaction	GASTROINTESTINAL SURGERY	2	305	6413	8.1873	2.03868	32.88	0.02561	0.03119	TRUE
1	Reaction	GASTROINTESTINAL TUBE INSERTION	2	1203	6413	2.06557	0.5161	8.26702	0.25286	0.03119	FALSE
1	Reaction	GLAUCOMA	2	8315	6413	0.29842	0.07464	1.19318	0.07776	0.03119	FALSE
1	Reaction	GRANULOCYTE COUNT INCREASED	2	144	6413	17.4701	4.32776	70.5224	0.00619	0.03119	TRUE
1	Reaction	Generalised tonic-clonic seizure	2	3959	6413	0.62693	0.15677	2.50713	0.7771	0.03119	FALSE
1	Reaction	Granulomatosis with polyangiitis	2	234	6413	10.6929	2.65888	43.0023	0.01563	0.03119	TRUE
1	Reaction	HAEMOGLOBIN ABNORMAL	2	2303	6413	1.07812	0.26952	4.31257	0.70978	0.03119	FALSE
1	Reaction	HEPARIN-INDUCED THROMBOCYTOPENIA	2	2867	6413	0.86588	0.21649	3.46319	1	0.03119	FALSE
1	Reaction	HEPATIC ENCEPHALOPATHY	2	4627	6413	0.53638	0.13413	2.14491	0.59866	0.03119	FALSE
1	Reaction	HEPATIC ISCHAEMIA	2	173	6413	14.5073	3.59973	58.4662	0.00881	0.03119	TRUE
1	Reaction	HEPATIC PAIN	2	1881	6413	1.32025	0.33001	5.28183	0.66694	0.03119	FALSE
1	Reaction	HEPATOBILIARY DISEASE	2	244	6413	10.251	2.54963	41.2152	0.01691	0.03119	TRUE
1	Reaction	HERPES VIRUS INFECTION	2	2664	6413	0.93191	0.23299	3.72742	1	0.03119	FALSE
1	Reaction	HIP FRACTURE	2	14083	6413	0.17618	0.04407	0.70437	0.00159	0.03119	TRUE
1	Reaction	HOSPICE CARE	2	1566	6413	1.58616	0.39642	6.34657	0.35953	0.03119	FALSE
1	Reaction	HYDROCEPHALUS	2	2696	6413	0.92084	0.23023	3.68313	1	0.03119	FALSE
1	Reaction	HYPERKERATOSIS	2	2505	6413	0.99111	0.24778	3.96433	1	0.03119	FALSE
1	Reaction	HYPERMAGNESAEMIA	2	232	6413	10.7859	2.68186	43.3785	0.01538	0.03119	TRUE
1	Reaction	HYPOGEUSIA	2	960	6413	2.58951	0.64682	10.367	0.18162	0.03119	FALSE
1	Reaction	HYPOGLYCAEMIC COMA	2	1658	6413	1.49804	0.37441	5.99368	0.3858	0.03119	FALSE
1	Reaction	HYPOTHERMIA	2	4653	6413	0.53338	0.13338	2.13292	0.59924	0.03119	FALSE
1	Reaction	HYPOVOLAEMIC SHOCK	2	1999	6413	1.24224	0.31052	4.96952	0.67815	0.03119	FALSE
1	Reaction	IDIOPATHIC THROMBOCYTOPENIC PURPURA	2	1737	6413	1.42983	0.35738	5.72055	0.40798	0.03119	FALSE
1	Reaction	ILEITIS	2	467	6413	5.33495	1.33054	21.391	0.05522	0.03119	FALSE
1	Reaction	ILEOSTOMY	2	858	6413	2.89807	0.72377	11.6043	0.15269	0.03119	FALSE
1	Reaction	IMMUNODEFICIENCY	2	3188	6413	0.77864	0.19469	3.11411	1	0.03119	FALSE
1	Reaction	IMMUNOSUPPRESSION	2	2688	6413	0.92359	0.23091	3.6941	1	0.03119	FALSE
1	Reaction	INCONTINENCE	2	5138	6413	0.48301	0.12079	1.93145	0.45508	0.03119	FALSE
1	Reaction	INCORRECT DOSE ADMINISTERED	2	61868	6413	0.0401	0.01003	0.16031	0	0.03119	TRUE
1	Reaction	INCORRECT PRODUCT STORAGE	2	13507	6413	0.18369	0.04594	0.73441	0.00328	0.03119	TRUE
1	Reaction	INCREASED APPETITE	2	7607	6413	0.3262	0.08158	1.30428	0.10433	0.03119	FALSE
1	Reaction	INFECTIOUS PERITONITIS	2	836	6413	2.97452	0.74283	11.9109	0.14658	0.03119	FALSE
1	Reaction	INFREQUENT BOWEL MOVEMENTS	2	1095	6413	2.26967	0.56703	9.08492	0.22095	0.03119	FALSE
1	Reaction	INFUSION SITE EXTRAVASATION	2	1849	6413	1.34312	0.33572	5.37341	0.66405	0.03119	FALSE
1	Reaction	INTESTINAL HAEMORRHAGE	2	2642	6413	0.93968	0.23493	3.7585	1	0.03119	FALSE
1	Reaction	INTESTINAL OPERATION	2	642	6413	3.87617	0.96751	15.5293	0.09539	0.03119	FALSE
1	Reaction	INTRA-ABDOMINAL HAEMORRHAGE	2	1291	6413	1.92455	0.4809	7.70202	0.27895	0.03119	FALSE
1	Reaction	IRON DEFICIENCY ANAEMIA	2	4358	6413	0.5695	0.14241	2.27741	0.5952	0.03119	FALSE
1	Reaction	Internal haemorrhage	2	5467	6413	0.45393	0.11352	1.81514	0.34116	0.03119	FALSE
1	Reaction	JAUNDICE CHOLESTATIC	2	1880	6413	1.32095	0.33019	5.28464	0.66684	0.03119	FALSE
1	Reaction	JEJUNAL PERFORATION	2	107	6413	23.6262	5.83284	95.6991	0.00348	0.03119	TRUE
1	Reaction	JOINT INJURY	2	9475	6413	0.26188	0.0655	1.04705	0.04259	0.03119	TRUE
1	Reaction	KERATITIS	2	1208	6413	2.05701	0.51396	8.2327	0.25435	0.03119	FALSE
1	Reaction	LACERATION	2	8475	6413	0.29278	0.07323	1.17064	0.07939	0.03119	FALSE
1	Reaction	LACTIC ACIDOSIS	2	10173	6413	0.2439	0.061	0.97518	0.02182	0.03119	TRUE
1	Reaction	LARYNGEAL OEDEMA	2	3143	6413	0.7898	0.19748	3.15874	1	0.03119	FALSE
1	Reaction	LARYNGITIS	2	4644	6413	0.53441	0.13364	2.13705	0.59903	0.03119	FALSE
1	Reaction	LEUKAEMIA	2	3431	6413	0.72346	0.1809	2.89334	1	0.03119	FALSE
1	Reaction	LIBIDO DECREASED	2	6795	6413	0.36519	0.09133	1.46022	0.19308	0.03119	FALSE
1	Reaction	LICHEN PLANUS	2	987	6413	2.51853	0.62911	10.0824	0.18941	0.03119	FALSE
1	Reaction	LUNG OPERATION	2	346	6413	7.21149	1.79668	28.9454	0.03226	0.03119	TRUE
1	Reaction	LYMPH NODE PAIN	2	872	6413	2.85144	0.71214	11.4173	0.15661	0.03119	FALSE
1	Reaction	LYMPHADENOPATHY MEDIASTINAL	2	835	6413	2.97809	0.74372	11.9253	0.1463	0.03119	FALSE
1	Reaction	LYMPHANGIOSIS CARCINOMATOSA	2	483	6413	5.15749	1.28641	20.6774	0.05858	0.03119	FALSE
1	Reaction	MACULAR DEGENERATION	2	4809	6413	0.51607	0.12906	2.06368	0.60349	0.03119	FALSE
1	Reaction	MACULE	2	711	6413	3.49894	0.87354	14.015	0.11295	0.03119	FALSE
1	Reaction	MASS	2	6307	6413	0.39346	0.0984	1.57326	0.25959	0.03119	FALSE
1	Reaction	MASTECTOMY	2	884	6413	2.81264	0.70247	11.2617	0.15998	0.03119	FALSE
1	Reaction	MECHANICAL ILEUS	2	157	6413	16.0049	3.96801	64.5551	0.00731	0.03119	TRUE
1	Reaction	MEDIASTINAL HAEMORRHAGE	2	71	6413	35.9529	8.81585	146.624	0.00155	0.03119	TRUE
1	Reaction	MEDICATION ERROR	2	33118	6413	0.07491	0.01874	0.29948	0	0.03119	TRUE
1	Reaction	MELANOMATOUS MENINGITIS	2	5	6413	826.917	138.192	4948.12	1e-05	0.03119	TRUE
1	Reaction	MELANOSIS	2	60	6413	42.7716	10.4486	175.087	0.00111	0.03119	TRUE
1	Reaction	MENINGEAL DISORDER	2	283	6413	8.8283	2.19751	35.4669	0.0223	0.03119	TRUE
1	Reaction	MENINGISM	2	251	6413	9.96286	2.47836	40.0502	0.01783	0.03119	TRUE
1	Reaction	MENINGITIS BACTERIAL	2	664	6413	3.74736	0.93543	15.0121	0.1009	0.03119	FALSE
1	Reaction	MENINGITIS VIRAL	2	738	6413	3.37059	0.84155	13.4999	0.12003	0.03119	FALSE
1	Reaction	MENTAL DISORDER DUE TO A GENERAL MEDICAL CONDITION	2	269	6413	9.2912	2.31214	37.3362	0.02029	0.03119	TRUE
1	Reaction	MENTAL IMPAIRMENT	2	11589	6413	0.2141	0.05355	0.856	0.00826	0.03119	TRUE
1	Reaction	METABOLIC DISORDER	2	2989	6413	0.83052	0.20765	3.32167	1	0.03119	FALSE
1	Reaction	METASTASES TO PLEURA	2	338	6413	7.38319	1.83928	29.6374	0.03092	0.03119	TRUE
1	Reaction	METASTASES TO SPINE	2	1378	6413	1.80287	0.45053	7.21456	0.30467	0.03119	FALSE
1	Reaction	METASTATIC NEOPLASM	2	2190	6413	1.1338	0.28343	4.53543	0.69771	0.03119	FALSE
1	Reaction	MIXED LIVER INJURY	2	437	6413	5.70288	1.42201	22.8709	0.0491	0.03119	TRUE
1	Reaction	MONOPARESIS	2	891	6413	2.7905	0.69694	11.1729	0.16195	0.03119	FALSE
1	Reaction	MONOPLEGIA	2	2273	6413	1.09236	0.27308	4.36957	0.70655	0.03119	FALSE
1	Reaction	MOOD SWINGS	2	17604	6413	0.14094	0.03525	0.56346	0.00015	0.03119	TRUE
1	Reaction	MOTOR DYSFUNCTION	2	4482	6413	0.55374	0.13847	2.21435	0.59622	0.03119	FALSE
1	Reaction	MUCOCUTANEOUS RASH	2	61	6413	42.0466	10.2756	172.051	0.00115	0.03119	TRUE
1	Reaction	MUCOSAL INFECTION	2	109	6413	23.1846	5.72522	93.8873	0.00361	0.03119	TRUE
1	Reaction	MUCOUS STOOLS	2	1144	6413	2.17229	0.54273	8.69464	0.2354	0.03119	FALSE
1	Reaction	MULTIPLE SCLEROSIS	2	21314	6413	0.1164	0.02912	0.46537	1e-05	0.03119	TRUE
1	Reaction	MULTIPLE SCLEROSIS RELAPSE	2	35689	6413	0.06951	0.01739	0.27791	0	0.03119	TRUE
1	Reaction	MUSCLE DISORDER	2	4633	6413	0.53568	0.13396	2.14213	0.59879	0.03119	FALSE
1	Reaction	MYOCARDIAL FIBROSIS	2	373	6413	6.68666	1.66641	26.831	0.03698	0.03119	TRUE
1	Reaction	MYOPATHY STEROID	2	95	6413	26.6747	6.57437	108.23	0.00276	0.03119	TRUE
1	Reaction	NECROTISING COLITIS	2	671	6413	3.70815	0.92566	14.8547	0.10267	0.03119	FALSE
1	Reaction	NECROTISING FASCIITIS	2	1331	6413	1.86663	0.46644	7.46996	0.29079	0.03119	FALSE
1	Reaction	NEPHRECTOMY	2	626	6413	3.97556	0.99226	15.9283	0.09144	0.03119	FALSE
1	Reaction	NEPHROPATHY TOXIC	2	4061	6413	0.61117	0.15283	2.44411	0.77841	0.03119	FALSE
1	Reaction	NEUROGENIC BLADDER	2	1186	6413	2.09523	0.5235	8.38585	0.24783	0.03119	FALSE
1	Reaction	NEUROLOGICAL EXAMINATION ABNORMAL	2	287	6413	8.70439	2.16682	34.9667	0.02288	0.03119	TRUE
1	Reaction	OPTIC NERVE DISORDER	2	964	6413	2.57874	0.64413	10.3238	0.18277	0.03119	FALSE
1	Reaction	ORAL INTAKE REDUCED	2	3001	6413	0.82719	0.20682	3.30838	1	0.03119	FALSE
1	Reaction	ORAL MUCOSAL BLISTERING	2	2610	6413	0.95121	0.23781	3.80464	1	0.03119	FALSE
1	Reaction	OSTEITIS	2	1503	6413	1.65273	0.41304	6.61319	0.34129	0.03119	FALSE
1	Reaction	PANCREATIC ENZYMES INCREASED	2	755	6413	3.29449	0.82259	13.1945	0.12455	0.03119	FALSE
1	Reaction	PANCREATIC INSUFFICIENCY	2	403	6413	6.18641	1.54217	24.8168	0.0425	0.03119	TRUE
1	Reaction	PARAPARESIS	2	874	6413	2.8449	0.71051	11.3911	0.15717	0.03119	FALSE
1	Reaction	PERSONALITY CHANGE	2	5219	6413	0.47551	0.11892	1.90145	0.45692	0.03119	FALSE
1	Reaction	PETIT MAL EPILEPSY	2	2435	6413	1.01963	0.25491	4.07846	0.72412	0.03119	FALSE
1	Reaction	PNEUMATOSIS INTESTINALIS	2	923	6413	2.69354	0.67276	10.7841	0.17103	0.03119	FALSE
1	Reaction	PNEUMONIA BACTERIAL	2	2724	6413	0.91137	0.22786	3.64522	1	0.03119	FALSE
1	Reaction	PNEUMOPERITONEUM	2	819	6413	3.03642	0.75826	12.1592	0.14189	0.03119	FALSE
1	Reaction	POLYPECTOMY	2	428	6413	5.82336	1.45196	23.3557	0.04732	0.03119	TRUE
1	Reaction	POOR QUALITY SLEEP	2	8435	6413	0.29417	0.07357	1.1762	0.07892	0.03119	FALSE
1	Reaction	POST PROCEDURAL HAEMORRHAGE	2	6248	6413	0.39717	0.09933	1.58813	0.25838	0.03119	FALSE
1	Reaction	POSTOPERATIVE WOUND INFECTION	2	2415	6413	1.02808	0.25702	4.11228	0.72194	0.03119	FALSE
1	Reaction	PREGNANCY ON CONTRACEPTIVE	2	905	6413	2.74723	0.68615	10.9994	0.16591	0.03119	FALSE
1	Reaction	PRERENAL FAILURE	2	437	6413	5.70288	1.42201	22.8709	0.0491	0.03119	TRUE
1	Reaction	PRIMARY HYPOTHYROIDISM	2	59	6413	43.5219	10.6275	178.232	0.00108	0.03119	TRUE
1	Reaction	PROSTATITIS	2	1522	6413	1.63207	0.40788	6.53045	0.34681	0.03119	FALSE
1	Reaction	PROTHROMBIN TIME PROLONGED	2	4943	6413	0.50207	0.12556	2.00769	0.45249	0.03119	FALSE
1	Reaction	PRURIGO	2	684	6413	3.63747	0.90805	14.571	0.10598	0.03119	FALSE
1	Reaction	PULMONARY ALVEOLAR HAEMORRHAGE	2	2063	6413	1.20366	0.30089	4.81509	0.68455	0.03119	FALSE
1	Reaction	PULMONARY GRANULOMA	2	663	6413	3.75303	0.93684	15.0349	0.10065	0.03119	FALSE
1	Reaction	PULMONARY HAEMORRHAGE	2	4318	6413	0.57478	0.14373	2.29852	0.59509	0.03119	FALSE
1	Reaction	PULMONARY INFARCTION	2	1762	6413	1.40952	0.35231	5.63923	0.6566	0.03119	FALSE
1	Reaction	PULMONARY SARCOIDOSIS	2	415	6413	6.00666	1.49751	24.0933	0.04479	0.03119	TRUE
1	Reaction	PULMONARY SEPSIS	2	496	6413	5.02176	1.25265	20.1317	0.06136	0.03119	FALSE
1	Reaction	PULMONARY THROMBOSIS	2	3928	6413	0.63188	0.15801	2.52693	0.77679	0.03119	FALSE
1	Reaction	PULMONARY TOXICITY	2	1871	6413	1.32731	0.33178	5.31011	0.66603	0.03119	FALSE
1	Reaction	PYODERMA GANGRENOSUM	2	927	6413	2.68189	0.66986	10.7374	0.17217	0.03119	FALSE
1	Reaction	Pancreatic cyst rupture	2	11	6413	275.639	59.566	1275.51	4e-05	0.03119	TRUE
1	Reaction	Perforation	2	138	6413	18.2408	4.51676	73.6651	0.0057	0.03119	TRUE
1	Reaction	Probiotic therapy	2	26	6413	103.365	24.4334	437.281	0.00021	0.03119	TRUE
1	Reaction	RADIUS FRACTURE	2	1290	6413	1.92605	0.48127	7.70801	0.27865	0.03119	FALSE
1	Reaction	RECTAL ABSCESS	2	701	6413	3.549	0.88601	14.2159	0.11036	0.03119	FALSE
1	Reaction	RED CELL DISTRIBUTION WIDTH INCREASED	2	1012	6413	2.45619	0.61356	9.83253	0.19666	0.03119	FALSE
1	Reaction	RENAL CYST	2	4009	6413	0.6191	0.15481	2.47583	0.77769	0.03119	FALSE
1	Reaction	RESPIRATION ABNORMAL	2	1525	6413	1.62886	0.40708	6.51757	0.34768	0.03119	FALSE
1	Reaction	RESPIRATORY TRACT INFECTION	2	9184	6413	0.27018	0.06757	1.08024	0.0412	0.03119	TRUE
1	Reaction	RESPIRATORY TRACT INFLAMMATION	2	181	6413	13.859	3.44008	55.8331	0.00961	0.03119	TRUE
1	Reaction	RETCHING	2	9619	6413	0.25795	0.06452	1.03137	0.02995	0.03119	TRUE
1	Reaction	RETINAL ARTERY OCCLUSION	2	964	6413	2.57874	0.64413	10.3238	0.18277	0.03119	FALSE
1	Reaction	RETROPERITONEAL HAEMORRHAGE	2	1555	6413	1.59739	0.39922	6.39156	0.35636	0.03119	FALSE
1	Reaction	ROTAVIRUS INFECTION	2	202	6413	12.4038	3.08137	49.9302	0.01184	0.03119	TRUE
1	Reaction	SARCOMA	2	557	6413	4.46982	1.11532	17.9135	0.075	0.03119	FALSE
1	Reaction	SCIATICA	2	5501	6413	0.45113	0.11282	1.80392	0.34134	0.03119	FALSE
1	Reaction	SCLERODERMA	2	1711	6413	1.45158	0.36281	5.80766	0.40072	0.03119	FALSE
1	Reaction	SECONDARY HYPOGONADISM	2	122	6413	20.6729	5.11209	83.5998	0.00449	0.03119	TRUE
1	Reaction	SECONDARY HYPOTHYROIDISM	2	77	6413	33.0767	8.12345	134.68	0.00182	0.03119	TRUE
1	Reaction	SICK SINUS SYNDROME	2	1271	6413	1.95489	0.48847	7.82354	0.27302	0.03119	FALSE
1	Reaction	SINUS DISORDER	2	7961	6413	0.31169	0.07795	1.24626	0.10768	0.03119	FALSE
1	Reaction	SINUSITIS NONINFECTIVE	2	12	6413	248.075	54.365	1132	4e-05	0.03119	TRUE
1	Reaction	SKIN CANCER	2	5386	6413	0.46076	0.11523	1.84246	0.46205	0.03119	FALSE
1	Reaction	SKIN EROSION	2	881	6413	2.82224	0.70486	11.3002	0.15914	0.03119	FALSE
1	Reaction	SKIN IRRITATION	2	6486	6413	0.3826	0.09568	1.52982	0.19035	0.03119	FALSE
1	Reaction	SKIN NECROSIS	2	2598	6413	0.95561	0.23891	3.82224	1	0.03119	FALSE
1	Reaction	SKIN PAPILLOMA	2	1806	6413	1.37514	0.34372	5.50158	0.66029	0.03119	FALSE
1	Reaction	SMALL INTESTINAL HAEMORRHAGE	2	1040	6413	2.38993	0.59703	9.56694	0.20482	0.03119	FALSE
1	Reaction	SOFT TISSUE INFECTION	2	813	6413	3.05888	0.76386	12.2493	0.14024	0.03119	FALSE
1	Reaction	SPINAL COLUMN STENOSIS	2	4184	6413	0.5932	0.14834	2.3722	0.78052	0.03119	FALSE
1	Reaction	SPINAL FRACTURE	2	7606	6413	0.32624	0.08159	1.30445	0.10433	0.03119	FALSE
1	Reaction	STAPHYLOCOCCAL SEPSIS	2	2882	6413	0.86137	0.21536	3.44514	1	0.03119	FALSE
1	Reaction	SUBARACHNOID HAEMORRHAGE	2	4579	6413	0.542	0.13554	2.16741	0.59771	0.03119	FALSE
1	Reaction	SUBDURAL HAEMATOMA	2	7004	6413	0.35429	0.08861	1.41662	0.14113	0.03119	FALSE
1	Reaction	SURFACTANT PROTEIN INCREASED	2	30	6413	88.5983	21.11	371.845	0.00028	0.03119	TRUE
1	Reaction	SWOLLEN TONGUE	2	16045	6413	0.15463	0.03868	0.61822	0.00042	0.03119	TRUE
1	Reaction	THIRST DECREASED	2	246	6413	10.167	2.52885	40.8755	0.01717	0.03119	TRUE
1	Reaction	THROAT IRRITATION	2	18376	6413	0.13501	0.03377	0.53978	0.00012	0.03119	TRUE
1	Reaction	THROMBOTIC MICROANGIOPATHY	2	2964	6413	0.83753	0.20941	3.34972	1	0.03119	FALSE
1	Reaction	THYROXINE DECREASED	2	279	6413	8.95578	2.22908	35.9816	0.02171	0.03119	TRUE
1	Reaction	TONGUE DISCOLOURATION	2	2699	6413	0.91982	0.22997	3.67903	1	0.03119	FALSE
1	Reaction	TOOTH EXTRACTION	2	6965	6413	0.35628	0.0891	1.42456	0.19669	0.03119	FALSE
1	Reaction	TOXIC EPIDERMAL NECROLYSIS	2	6764	6413	0.36687	0.09175	1.46691	0.19258	0.03119	FALSE
1	Reaction	TREATMENT NONCOMPLIANCE	2	21324	6413	0.11635	0.0291	0.46515	1e-05	0.03119	TRUE
1	Reaction	TROPONIN I INCREASED	2	764	6413	3.25558	0.81289	13.0384	0.12696	0.03119	FALSE
1	Reaction	Thyroid hormones decreased	2	97	6413	26.1132	6.43796	105.918	0.00287	0.03119	TRUE
1	Reaction	Tumour pseudoprogression	2	49	6413	52.7819	12.8234	217.254	0.00074	0.03119	TRUE
1	Reaction	ULCER	2	7406	6413	0.33506	0.0838	1.33969	0.14477	0.03119	FALSE
1	Reaction	UPPER LIMB FRACTURE	2	9339	6413	0.26569	0.06645	1.0623	0.04176	0.03119	TRUE
1	Reaction	VAGINAL HAEMORRHAGE	2	22977	6413	0.10798	0.02701	0.43168	0	0.03119	TRUE
1	Reaction	VASCULAR ACCESS COMPLICATION	2	247	6413	10.1255	2.51859	40.7077	0.0173	0.03119	TRUE
1	Reaction	VASCULAR INJURY	2	882	6413	2.81904	0.70406	11.2873	0.15942	0.03119	FALSE
1	Reaction	VITH NERVE PARALYSIS	2	636	6413	3.91286	0.97665	15.6765	0.0939	0.03119	FALSE
1	Reaction	VITREOUS FLOATERS	2	3401	6413	0.72985	0.18249	2.91888	1	0.03119	FALSE
1	Reaction	VITRITIS	2	426	6413	5.85083	1.45879	23.4662	0.04693	0.03119	TRUE
1	Reaction	VULVOVAGINAL PRURITUS	2	1998	6413	1.24286	0.31068	4.97201	0.67805	0.03119	FALSE
1	Reaction	WEIGHT FLUCTUATION	2	2895	6413	0.8575	0.2144	3.42965	1	0.03119	FALSE
1	Reaction	WOUND	2	7640	6413	0.32479	0.08123	1.29864	0.10445	0.03119	FALSE
1	Reaction	WOUND DEHISCENCE	2	2049	6413	1.2119	0.30295	4.84805	0.68313	0.03119	FALSE
1	Reaction	ABDOMINAL MASS	1	1199	6413	1.03537	0.14574	7.35533	0.61952	0.01559	FALSE
1	Reaction	ABDOMINAL NEOPLASM	1	421	6413	2.95328	0.41509	21.012	0.28772	0.01559	FALSE
1	Reaction	ABDOMINAL RIGIDITY	1	1216	6413	1.02089	0.14371	7.25234	0.6247	0.01559	FALSE
1	Reaction	ABDOMINAL WALL HAEMATOMA	1	924	6413	1.34385	0.18912	9.54912	0.52511	0.01559	FALSE
1	Reaction	ABDOMINAL WOUND DEHISCENCE	1	150	6413	8.32467	1.1651	59.4798	0.11386	0.01559	FALSE
1	Reaction	ABNORMAL BEHAVIOUR	1	25388	6413	0.04886	0.00688	0.34682	0	0.01559	TRUE
1	Reaction	ABNORMAL LOSS OF WEIGHT	1	2864	6413	0.43324	0.06101	3.07632	0.73494	0.01559	FALSE
1	Reaction	ABORTION SPONTANEOUS	1	19837	6413	0.06253	0.00881	0.44389	0	0.01559	TRUE
1	Reaction	ABSCESS	1	7126	6413	0.17409	0.02452	1.23589	0.05427	0.01559	FALSE
1	Reaction	ABSCESS DRAINAGE	1	487	6413	2.55221	0.35883	18.1528	0.32462	0.01559	FALSE
1	Reaction	ACCIDENTAL OVERDOSE	1	14435	6413	0.08593	0.01211	0.61002	0.00019	0.01559	TRUE
1	Reaction	ACHROMOTRICHIA ACQUIRED	1	11	6413	124.038	15.8801	968.844	0.00883	0.01559	TRUE
1	Reaction	ACOUSTIC NEURITIS	1	16	6413	82.6917	10.9243	625.938	0.01281	0.01559	TRUE
1	Reaction	ACQUIRED EPIDERMOLYSIS BULLOSA	1	52	6413	24.3211	3.36145	175.97	0.04104	0.01559	TRUE
1	Reaction	ACQUIRED HAEMOPHILIA	1	265	6413	4.69839	0.65946	33.4742	0.1923	0.01559	FALSE
1	Reaction	ACTINIC KERATOSIS	1	1194	6413	1.03971	0.14635	7.38619	0.61799	0.01559	FALSE
1	Reaction	ACUTE CORONARY SYNDROME	1	4836	6413	0.25654	0.03613	1.82136	0.19931	0.01559	FALSE
1	Reaction	ACUTE INTERSTITIAL PNEUMONITIS	1	175	6413	7.1286	0.99864	50.8859	0.13154	0.01559	FALSE
1	Reaction	ACUTE LYMPHOCYTIC LEUKAEMIA	1	1207	6413	1.0285	0.14478	7.3065	0.62197	0.01559	FALSE
1	Reaction	ACUTE PRERENAL FAILURE	1	1250	6413	0.99309	0.1398	7.05476	1	0.01559	FALSE
1	Reaction	ACUTE PULMONARY OEDEMA	1	3163	6413	0.39228	0.05525	2.78533	0.53008	0.01559	FALSE
1	Reaction	ADENOCARCINOMA PANCREAS	1	722	6413	1.72035	0.24203	12.2281	0.44115	0.01559	FALSE
1	Reaction	ADENOMA BENIGN	1	450	6413	2.76253	0.38834	19.6519	0.30418	0.01559	FALSE
1	Reaction	ADHESION	1	971	6413	1.27874	0.17997	9.08596	0.54277	0.01559	FALSE
1	Reaction	ADRENAL CYST	1	44	6413	28.8459	3.97276	209.449	0.03484	0.01559	TRUE
1	Reaction	ADRENAL NEOPLASM	1	259	6413	4.80766	0.67474	34.2557	0.18838	0.01559	FALSE
1	Reaction	ADRENAL SUPPRESSION	1	434	6413	2.86461	0.40265	20.3797	0.29514	0.01559	FALSE
1	Reaction	ADRENALITIS	1	25	6413	51.6823	6.99258	381.985	0.01995	0.01559	TRUE
1	Reaction	ADVERSE REACTION	1	5122	6413	0.24221	0.03412	1.71962	0.20668	0.01559	FALSE
1	Reaction	AFFECTIVE DISORDER	1	2954	6413	0.42004	0.05916	2.98253	0.73774	0.01559	FALSE
1	Reaction	AGITATION	1	40742	6413	0.03045	0.00429	0.21611	0	0.01559	TRUE
1	Reaction	ALANINE AMINOTRANSFERASE	1	115	6413	10.8805	1.51975	77.8977	0.08851	0.01559	FALSE
1	Reaction	ALCOHOL ABUSE	1	1279	6413	0.97056	0.13663	6.89455	1	0.01559	FALSE
1	Reaction	ALCOHOLISM	1	1695	6413	0.73222	0.1031	5.20046	1	0.01559	FALSE
1	Reaction	ALKALOSIS	1	206	6413	6.05061	0.84835	43.1543	0.15297	0.01559	FALSE
1	Reaction	ALOPECIA UNIVERSALIS	1	105	6413	11.9267	1.66451	85.4582	0.08114	0.01559	FALSE
1	Reaction	ALVEOLITIS	1	978	6413	1.26958	0.17868	9.0208	0.54534	0.01559	FALSE
1	Reaction	AMENORRHOEA	1	9643	6413	0.12864	0.01812	0.91323	0.00644	0.01559	TRUE
1	Reaction	AMOEBIC COLITIS	1	32	6413	40.0121	5.46285	293.065	0.02546	0.01559	TRUE
1	Reaction	ANAEMIA OF MALIGNANT DISEASE	1	135	6413	9.25653	1.29457	66.1865	0.10309	0.01559	FALSE
1	Reaction	ANAL FISSURE	1	1490	6413	0.83303	0.11728	5.91691	1	0.01559	FALSE
1	Reaction	ANAL HAEMORRHAGE	1	1210	6413	1.02595	0.14442	7.28836	0.62288	0.01559	FALSE
1	Reaction	ANAL INFLAMMATION	1	205	6413	6.08027	0.85249	43.3668	0.15228	0.01559	FALSE
1	Reaction	ANAL ULCER	1	316	6413	3.9377	0.55302	28.0378	0.22482	0.01559	FALSE
1	Reaction	ANGIOEDEMA	1	18699	6413	0.06634	0.00935	0.4709	1e-05	0.01559	TRUE
1	Reaction	ANGIOPATHY	1	3623	6413	0.34246	0.04823	2.43149	0.38259	0.01559	FALSE
1	Reaction	ANGIOSARCOMA	1	185	6413	6.74117	0.94466	48.1057	0.13851	0.01559	FALSE
1	Reaction	ANORECTAL INFECTION	1	95	6413	13.1955	1.83975	94.6438	0.0737	0.01559	FALSE
1	Reaction	ANTI-NEUTROPHIL CYTOPLASMIC ANTIBODY POSITIVE VASCULITIS	1	353	6413	3.52379	0.49505	25.0824	0.2476	0.01559	FALSE
1	Reaction	ANTI-THYROID ANTIBODY POSITIVE	1	226	6413	5.51278	0.77327	39.3017	0.16651	0.01559	FALSE
1	Reaction	ANTIPHOSPHOLIPID SYNDROME	1	654	6413	1.8995	0.2672	13.5034	0.40967	0.01559	FALSE
1	Reaction	ANURIA	1	4721	6413	0.26279	0.03701	1.86574	0.19799	0.01559	FALSE
1	Reaction	AORTIC ARTERIOSCLEROSIS	1	1416	6413	0.87659	0.12341	6.22656	1	0.01559	FALSE
1	Reaction	AORTIC VALVE REPLACEMENT	1	655	6413	1.8966	0.26679	13.4827	0.41014	0.01559	FALSE
1	Reaction	APHAGIA	1	5268	6413	0.2355	0.03317	1.67194	0.14197	0.01559	FALSE
1	Reaction	APHTHOUS STOMATITIS	1	2470	6413	0.50238	0.07075	3.56743	1	0.01559	FALSE
1	Reaction	APPENDIX DISORDER	1	711	6413	1.74701	0.24578	12.4178	0.43617	0.01559	FALSE
1	Reaction	ARRHYTHMIA SUPRAVENTRICULAR	1	725	6413	1.71323	0.24103	12.1774	0.4425	0.01559	FALSE
1	Reaction	ARTERIAL INJURY	1	363	6413	3.42645	0.48141	24.3877	0.25364	0.01559	FALSE
1	Reaction	ARTERIAL THROMBOSIS LIMB	1	499	6413	2.49071	0.3502	17.7145	0.33112	0.01559	FALSE
1	Reaction	ARTERIOSCLEROSIS CORONARY ARTERY	1	4152	6413	0.29881	0.04209	2.12155	0.27548	0.01559	FALSE
1	Reaction	ARTERITIS	1	353	6413	3.52379	0.49505	25.0824	0.2476	0.01559	FALSE
1	Reaction	ARTHRITIS INFECTIVE	1	1913	6413	0.64873	0.09135	4.60722	1	0.01559	FALSE
1	Reaction	ASPARTATE AMINOTRANSFERASE	1	101	6413	12.4038	1.73044	88.9098	0.07817	0.01559	FALSE
1	Reaction	ASPARTATE AMINOTRANSFERASE ABNORMAL	1	569	6413	2.18376	0.30712	15.5276	0.36781	0.01559	FALSE
1	Reaction	ASPIRATION JOINT	1	112	6413	11.1746	1.56046	80.0216	0.08631	0.01559	FALSE
1	Reaction	ASTERIXIS	1	642	6413	1.93506	0.2722	13.7566	0.40393	0.01559	FALSE
1	Reaction	ATRIAL THROMBOSIS	1	1010	6413	1.22931	0.17302	8.73443	0.55691	0.01559	FALSE
1	Reaction	ATRIOVENTRICULAR BLOCK	1	3776	6413	0.32858	0.04628	2.33292	0.38451	0.01559	FALSE
1	Reaction	ATRIOVENTRICULAR BLOCK COMPLETE	1	3351	6413	0.37026	0.05215	2.62897	0.53432	0.01559	FALSE
1	Reaction	ATRIOVENTRICULAR BLOCK SECOND DEGREE	1	1695	6413	0.73222	0.1031	5.20046	1	0.01559	FALSE
1	Reaction	AUTOANTIBODY TEST	1	12	6413	112.761	14.5599	873.302	0.00962	0.01559	TRUE
1	Reaction	AUTOIMMUNE INNER EAR DISEASE	1	11	6413	124.038	15.8801	968.844	0.00883	0.01559	TRUE
1	Reaction	AUTOIMMUNE MYOCARDITIS	1	26	6413	49.615	6.72363	366.119	0.02073	0.01559	TRUE
1	Reaction	AUTOIMMUNE PANCYTOPENIA	1	36	6413	35.4393	4.85578	258.649	0.0286	0.01559	TRUE
1	Reaction	AXILLARY MASS	1	504	6413	2.46596	0.34673	17.5381	0.33381	0.01559	FALSE
1	Reaction	AZOTAEMIA	1	2115	6413	0.58674	0.08262	4.16678	1	0.01559	FALSE
1	Reaction	Acute motor-sensory axonal neuropathy	1	25	6413	51.6823	6.99258	381.985	0.01995	0.01559	TRUE
1	Reaction	Adenocarcinoma gastric	1	252	6413	4.94174	0.69348	35.2147	0.18379	0.01559	FALSE
1	Reaction	Autoimmune encephalopathy	1	10	6413	137.82	17.4627	1087.7	0.00803	0.01559	TRUE
1	Reaction	Autoimmune nephritis	1	16	6413	82.6917	10.9243	625.938	0.01281	0.01559	TRUE
1	Reaction	BACTERIAL INFECTION	1	7760	6413	0.15986	0.02252	1.13489	0.02588	0.01559	TRUE
1	Reaction	BACTERIAL TEST POSITIVE	1	998	6413	1.24411	0.1751	8.83966	0.55261	0.01559	FALSE
1	Reaction	BACTERIURIA	1	247	6413	5.04218	0.70752	35.9333	0.1805	0.01559	FALSE
1	Reaction	BARRETT'S OESOPHAGUS	1	1914	6413	0.64839	0.0913	4.60481	1	0.01559	FALSE
1	Reaction	BILE DUCT STONE	1	1616	6413	0.76803	0.10814	5.455	1	0.01559	FALSE
1	Reaction	BILIARY CIRRHOSIS PRIMARY	1	370	6413	3.36145	0.47231	23.9238	0.25783	0.01559	FALSE
1	Reaction	BILIRUBIN CONJUGATED INCREASED	1	1447	6413	0.8578	0.12076	6.09298	1	0.01559	FALSE
1	Reaction	BIOPSY LIVER	1	268	6413	4.6456	0.65208	33.0968	0.19425	0.01559	FALSE
1	Reaction	BLADDER CATHETERISATION	1	455	6413	2.7321	0.38407	19.435	0.30697	0.01559	FALSE
1	Reaction	BLADDER DISCOMFORT	1	492	6413	2.52622	0.35518	17.9675	0.32733	0.01559	FALSE
1	Reaction	BLADDER IRRITATION	1	255	6413	4.88337	0.68532	34.7972	0.18576	0.01559	FALSE
1	Reaction	BLEPHAROSPASM	1	2065	6413	0.60096	0.08462	4.26776	1	0.01559	FALSE
1	Reaction	BLOOD ALKALINE PHOSPHATASE	1	118	6413	10.6015	1.48111	75.8837	0.09071	0.01559	FALSE
1	Reaction	BLOOD ALKALINE PHOSPHATASE ABNORMAL	1	333	6413	3.73607	0.52479	26.5979	0.23537	0.01559	FALSE
1	Reaction	BLOOD ANTIDIURETIC HORMONE ABNORMAL	1	15	6413	88.5983	11.6519	673.681	0.01202	0.01559	TRUE
1	Reaction	BLOOD BICARBONATE DECREASED	1	1279	6413	0.97056	0.13663	6.89455	1	0.01559	FALSE
1	Reaction	BLOOD BILIRUBIN	1	45	6413	28.1904	3.88446	204.584	0.03562	0.01559	TRUE
1	Reaction	BLOOD CALCIUM DECREASED	1	5428	6413	0.22856	0.03219	1.62264	0.14397	0.01559	FALSE
1	Reaction	BLOOD CHLORIDE INCREASED	1	930	6413	1.33517	0.1879	9.48738	0.5274	0.01559	FALSE
1	Reaction	BLOOD CHOLESTEROL INCREASED	1	23953	6413	0.05179	0.0073	0.3676	0	0.01559	TRUE
1	Reaction	BLOOD CORTICOTROPHIN ABNORMAL	1	47	6413	26.9647	3.71913	195.501	0.03717	0.01559	TRUE
1	Reaction	BLOOD CREATINE ABNORMAL	1	167	6413	7.47214	1.04649	53.3527	0.12592	0.01559	FALSE
1	Reaction	BLOOD CREATINE INCREASED	1	2306	6413	0.53812	0.07578	3.82136	1	0.01559	FALSE
1	Reaction	BLOOD CREATININE ABNORMAL	1	1274	6413	0.97437	0.13716	6.92165	1	0.01559	FALSE
1	Reaction	BLOOD CULTURE POSITIVE	1	2680	6413	0.463	0.0652	3.28768	0.73081	0.01559	FALSE
1	Reaction	BLOOD ELECTROLYTES ABNORMAL	1	724	6413	1.7156	0.24137	12.1942	0.44205	0.01559	FALSE
1	Reaction	BLOOD FOLLICLE STIMULATING HORMONE INCREASED	1	247	6413	5.04218	0.70752	35.9333	0.1805	0.01559	FALSE
1	Reaction	BLOOD IRON DECREASED	1	3463	6413	0.35828	0.05046	2.5439	0.53839	0.01559	FALSE
1	Reaction	BLOOD LACTATE DEHYDROGENASE DECREASED	1	215	6413	5.79615	0.81283	41.3311	0.15909	0.01559	FALSE
1	Reaction	BLOOD LUTEINISING HORMONE DECREASED	1	99	6413	12.6569	1.7654	90.7424	0.07668	0.01559	FALSE
1	Reaction	BLOOD MAGNESIUM DECREASED	1	3294	6413	0.37667	0.05305	2.67449	0.53267	0.01559	FALSE
1	Reaction	BLOOD PRESSURE ABNORMAL	1	6479	6413	0.19148	0.02697	1.35934	0.07392	0.01559	FALSE
1	Reaction	BLOOD PRESSURE DIASTOLIC DECREASED	1	2831	6413	0.4383	0.06173	3.1122	0.73403	0.01559	FALSE
1	Reaction	BLOOD PRESSURE DIASTOLIC INCREASED	1	1368	6413	0.90737	0.12774	6.44535	1	0.01559	FALSE
1	Reaction	BLOOD PROLACTIN ABNORMAL	1	186	6413	6.70473	0.93958	47.8443	0.1392	0.01559	FALSE
1	Reaction	BLOOD PROLACTIN INCREASED	1	2391	6413	0.51899	0.07308	3.6854	1	0.01559	FALSE
1	Reaction	BLOOD SODIUM INCREASED	1	1482	6413	0.83753	0.11791	5.94889	1	0.01559	FALSE
1	Reaction	BLOOD TEST ABNORMAL	1	4145	6413	0.29932	0.04216	2.12514	0.27546	0.01559	FALSE
1	Reaction	BLOOD THYROID STIMULATING HORMONE	1	49	6413	25.8412	3.5673	187.191	0.03872	0.01559	TRUE
1	Reaction	BLOOD TRIGLYCERIDES INCREASED	1	10877	6413	0.11405	0.01607	0.80961	0.00331	0.01559	TRUE
1	Reaction	BODY HEIGHT DECREASED	1	5780	6413	0.21463	0.03023	1.52379	0.10143	0.01559	FALSE
1	Reaction	BODY MASS INDEX DECREASED	1	161	6413	7.75235	1.08549	55.3656	0.12168	0.01559	FALSE
1	Reaction	BONE DISORDER	1	11361	6413	0.10919	0.01538	0.77511	0.00233	0.01559	TRUE
1	Reaction	BONE LESION	1	1757	6413	0.70636	0.09946	5.01674	1	0.01559	FALSE
1	Reaction	BONE OPERATION	1	380	6413	3.27276	0.45988	23.2909	0.26379	0.01559	FALSE
1	Reaction	BORDERLINE OVARIAN TUMOUR	1	28	6413	45.9398	6.24335	338.035	0.02231	0.01559	TRUE
1	Reaction	BRACHIAL PLEXUS INJURY	1	89	6413	14.0952	1.9638	101.168	0.06921	0.01559	FALSE
1	Reaction	BRAIN CANCER METASTATIC	1	216	6413	5.76919	0.80907	41.138	0.15976	0.01559	FALSE
1	Reaction	BRAIN HERNIATION	1	1438	6413	0.86317	0.12152	6.13117	1	0.01559	FALSE
1	Reaction	BRAIN MASS	1	394	6413	3.15617	0.44353	22.4592	0.27205	0.01559	FALSE
1	Reaction	BRAIN NATRIURETIC PEPTIDE INCREASED	1	1354	6413	0.91676	0.12906	6.5121	1	0.01559	FALSE
1	Reaction	BRAIN NEOPLASM BENIGN	1	272	6413	4.57703	0.64249	32.6065	0.19684	0.01559	FALSE
1	Reaction	BRAIN TUMOUR OPERATION	1	107	6413	11.7017	1.63339	83.8309	0.08262	0.01559	FALSE
1	Reaction	BREAST CANCER	1	31012	6413	0.04	0.00563	0.28392	0	0.01559	TRUE
1	Reaction	BREAST MASS	1	3531	6413	0.35138	0.04949	2.49488	0.54137	0.01559	FALSE
1	Reaction	BREATH SOUNDS ABNORMAL	1	1836	6413	0.67595	0.09518	4.80065	1	0.01559	FALSE
1	Reaction	BRIEF PSYCHOTIC DISORDER WITH MARKED STRESSORS	1	64	6413	19.6885	2.73107	141.936	0.05027	0.01559	FALSE
1	Reaction	BRONCHOPLEURAL FISTULA	1	122	6413	10.251	1.43254	73.3549	0.09364	0.01559	FALSE
1	Reaction	BRONCHOSPASM	1	7374	6413	0.16823	0.0237	1.19431	0.03688	0.01559	TRUE
1	Reaction	BRUCELLOSIS	1	76	6413	16.5383	2.29977	118.932	0.05941	0.01559	FALSE
1	Reaction	BUDD-CHIARI SYNDROME	1	160	6413	7.8011	1.09228	55.716	0.12098	0.01559	FALSE
1	Reaction	BUNDLE BRANCH BLOCK RIGHT	1	2915	6413	0.42566	0.05995	3.02246	0.73647	0.01559	FALSE
1	Reaction	BURNS THIRD DEGREE	1	550	6413	2.25934	0.31773	16.066	0.35805	0.01559	FALSE
1	Reaction	BURSITIS	1	4717	6413	0.26301	0.03705	1.86733	0.19796	0.01559	FALSE
1	Reaction	Biliary hamartoma	1	5	6413	310.094	34.6627	2774.11	0.00402	0.01559	TRUE
1	Reaction	CALCULUS URETERIC	1	811	6413	1.53133	0.21547	10.8829	0.47983	0.01559	FALSE
1	Reaction	CAMPYLOBACTER TEST POSITIVE	1	27	6413	47.7068	6.4746	351.518	0.02152	0.01559	TRUE
1	Reaction	CANDIDIASIS	1	4547	6413	0.27285	0.03843	1.93717	0.28398	0.01559	FALSE
1	Reaction	CARCINOID TUMOUR OF THE APPENDIX	1	44	6413	28.8459	3.97276	209.449	0.03484	0.01559	TRUE
1	Reaction	CARDIAC ENZYMES INCREASED	1	808	6413	1.53702	0.21627	10.9234	0.47857	0.01559	FALSE
1	Reaction	CARDIAC FAILURE ACUTE	1	2340	6413	0.5303	0.07468	3.76579	1	0.01559	FALSE
1	Reaction	CARDIAC MYXOMA	1	104	6413	12.0425	1.68052	86.2957	0.0804	0.01559	FALSE
1	Reaction	CARDIAC OPERATION	1	3596	6413	0.34503	0.04859	2.44976	0.3825	0.01559	FALSE
1	Reaction	CARDIAC TAMPONADE	1	2119	6413	0.58564	0.08247	4.1589	1	0.01559	FALSE
1	Reaction	CARDIOVASCULAR INSUFFICIENCY	1	833	6413	1.49084	0.20978	10.5948	0.48897	0.01559	FALSE
1	Reaction	CARPAL TUNNEL SYNDROME	1	6156	6413	0.20152	0.02839	1.43069	0.07198	0.01559	FALSE
1	Reaction	CAUDA EQUINA SYNDROME	1	371	6413	3.35237	0.47103	23.859	0.25843	0.01559	FALSE
1	Reaction	CELLULITIS OF MALE EXTERNAL GENITAL ORGAN	1	44	6413	28.8459	3.97276	209.449	0.03484	0.01559	TRUE
1	Reaction	CENTRAL NERVOUS SYSTEM LESION	1	7548	6413	0.16435	0.02315	1.16677	0.03799	0.01559	TRUE
1	Reaction	CENTRAL VENOUS CATHETERISATION	1	1378	6413	0.90078	0.12681	6.39851	1	0.01559	FALSE
1	Reaction	CEREBELLAR HAEMATOMA	1	146	6413	8.55431	1.19703	61.1317	0.111	0.01559	FALSE
1	Reaction	CEREBELLAR HAEMORRHAGE	1	716	6413	1.73479	0.24406	12.3308	0.43844	0.01559	FALSE
1	Reaction	CEREBELLAR SYNDROME	1	1277	6413	0.97208	0.13684	6.90537	1	0.01559	FALSE
1	Reaction	CEREBRAL HAEMATOMA	1	1621	6413	0.76566	0.1078	5.43816	1	0.01559	FALSE
1	Reaction	CEREBRAL VENOUS THROMBOSIS	1	904	6413	1.37362	0.19331	9.76085	0.5174	0.01559	FALSE
1	Reaction	CHAPPED LIPS	1	2088	6413	0.59433	0.08369	4.22071	1	0.01559	FALSE
1	Reaction	CHEILITIS	1	3027	6413	0.40991	0.05773	2.91055	0.74035	0.01559	FALSE
1	Reaction	CHEST X-RAY ABNORMAL	1	2257	6413	0.54981	0.07742	3.90439	1	0.01559	FALSE
1	Reaction	CHOLECYSTECTOMY	1	7538	6413	0.16457	0.02318	1.16832	0.03791	0.01559	TRUE
1	Reaction	CHONDROCALCINOSIS	1	204	6413	6.11022	0.85667	43.5815	0.1516	0.01559	FALSE
1	Reaction	CHOROIDAL NEOVASCULARISATION	1	387	6413	3.21341	0.45156	22.8675	0.26793	0.01559	FALSE
1	Reaction	CHRONIC INFLAMMATORY DEMYELINATING POLYRADICULONEUROPATHY	1	325	6413	3.82832	0.53771	27.2566	0.23043	0.01559	FALSE
1	Reaction	CHRONIC MYELOID LEUKAEMIA	1	2074	6413	0.59835	0.08426	4.24923	1	0.01559	FALSE
1	Reaction	CLAVICLE FRACTURE	1	1658	6413	0.74857	0.1054	5.31665	1	0.01559	FALSE
1	Reaction	CLUMSINESS	1	1315	6413	0.94397	0.13289	6.70552	1	0.01559	FALSE
1	Reaction	COCCIDIOIDOMYCOSIS	1	460	6413	2.70234	0.37989	19.2229	0.30976	0.01559	FALSE
1	Reaction	COLON ADENOMA	1	766	6413	1.62141	0.22813	11.5239	0.46062	0.01559	FALSE
1	Reaction	COLON INJURY	1	200	6413	6.23304	0.8738	44.4618	0.14886	0.01559	FALSE
1	Reaction	COLON OPERATION	1	503	6413	2.47087	0.34742	17.5731	0.33327	0.01559	FALSE
1	Reaction	COLONIC OBSTRUCTION	1	314	6413	3.96286	0.55654	28.2175	0.22357	0.01559	FALSE
1	Reaction	COLONIC STENOSIS	1	407	6413	3.05511	0.42937	21.7383	0.27964	0.01559	FALSE
1	Reaction	COLONOSCOPY	1	849	6413	1.46271	0.20583	10.3947	0.49552	0.01559	FALSE
1	Reaction	COLONOSCOPY ABNORMAL	1	211	6413	5.90655	0.82824	42.122	0.15637	0.01559	FALSE
1	Reaction	COLONY STIMULATING FACTOR THERAPY	1	53	6413	23.8534	3.29802	172.523	0.04181	0.01559	TRUE
1	Reaction	COLOUR BLINDNESS	1	512	6413	2.42735	0.34131	17.263	0.33809	0.01559	FALSE
1	Reaction	COMA ACIDOTIC	1	32	6413	40.0121	5.46285	293.065	0.02546	0.01559	TRUE
1	Reaction	COMA HEPATIC	1	578	6413	2.1497	0.30234	15.285	0.37238	0.01559	FALSE
1	Reaction	CONJUNCTIVAL HYPERAEMIA	1	1469	6413	0.84494	0.11896	6.00161	1	0.01559	FALSE
1	Reaction	CONJUNCTIVITIS ALLERGIC	1	393	6413	3.16422	0.44466	22.5166	0.27147	0.01559	FALSE
1	Reaction	COOMBS TEST POSITIVE	1	221	6413	5.63807	0.79076	40.1989	0.16314	0.01559	FALSE
1	Reaction	COR PULMONALE	1	691	6413	1.79765	0.25289	12.7782	0.42701	0.01559	FALSE
1	Reaction	CORONARY ARTERY ATHEROSCLEROSIS	1	606	6413	2.05021	0.28837	14.5764	0.38638	0.01559	FALSE
1	Reaction	CRITICAL ILLNESS POLYNEUROPATHY	1	79	6413	15.9023	2.21242	114.301	0.06168	0.01559	FALSE
1	Reaction	CULTURE URINE POSITIVE	1	1183	6413	1.04939	0.14772	7.45498	0.61458	0.01559	FALSE
1	Reaction	CUSHING'S SYNDROME	1	1661	6413	0.74721	0.10521	5.30704	1	0.01559	FALSE
1	Reaction	CUTANEOUS LUPUS ERYTHEMATOSUS	1	1129	6413	1.09962	0.15478	7.81218	0.59744	0.01559	FALSE
1	Reaction	CYSTITIS HAEMORRHAGIC	1	1703	6413	0.72878	0.10261	5.176	1	0.01559	FALSE
1	Reaction	CYTOMEGALOVIRUS ENTERITIS	1	83	6413	15.1265	2.10578	108.659	0.0647	0.01559	FALSE
1	Reaction	CYTOMEGALOVIRUS HEPATITIS	1	145	6413	8.61372	1.20528	61.5591	0.11028	0.01559	FALSE
1	Reaction	CYTOMEGALOVIRUS TEST POSITIVE	1	833	6413	1.49084	0.20978	10.5948	0.48897	0.01559	FALSE
1	Reaction	CYTOREDUCTIVE SURGERY	1	24	6413	53.9294	7.28392	399.287	0.01916	0.01559	TRUE
1	Reaction	Cholangitis infective	1	32	6413	40.0121	5.46285	293.065	0.02546	0.01559	TRUE
1	Reaction	Chorioretinal folds	1	17	6413	77.5235	10.2821	584.499	0.01361	0.01559	TRUE
1	Reaction	Complication associated with device	1	2383	6413	0.52073	0.07333	3.69778	1	0.01559	FALSE
1	Reaction	DAYDREAMING	1	648	6413	1.91712	0.26967	13.6288	0.40681	0.01559	FALSE
1	Reaction	DEAFNESS BILATERAL	1	735	6413	1.68989	0.23775	12.0112	0.44697	0.01559	FALSE
1	Reaction	DEAFNESS NEUROSENSORY	1	1424	6413	0.87166	0.12272	6.19153	1	0.01559	FALSE
1	Reaction	DECREASED ACTIVITY	1	3752	6413	0.33068	0.04657	2.34785	0.38405	0.01559	FALSE
1	Reaction	DECREASED IMMUNE RESPONSIVENESS	1	2150	6413	0.57719	0.08128	4.09888	1	0.01559	FALSE
1	Reaction	DENTAL CARIES	1	5883	6413	0.21088	0.0297	1.4971	0.10232	0.01559	FALSE
1	Reaction	DERMATITIS CONTACT	1	4793	6413	0.25884	0.03646	1.83771	0.1987	0.01559	FALSE
1	Reaction	DERMATITIS PSORIASIFORM	1	718	6413	1.72995	0.24338	12.2964	0.43935	0.01559	FALSE
1	Reaction	DERMO-HYPODERMITIS	1	121	6413	10.3365	1.44438	73.9712	0.09291	0.01559	FALSE
1	Reaction	DEVICE RELATED SEPSIS	1	765	6413	1.62353	0.22843	11.539	0.46019	0.01559	FALSE
1	Reaction	DIAPHRAGMATIC DISORDER	1	434	6413	2.86461	0.40265	20.3797	0.29514	0.01559	FALSE
1	Reaction	DIARRHOEA INFECTIOUS	1	299	6413	4.16233	0.58447	29.6425	0.21413	0.01559	FALSE
1	Reaction	DIFFUSE ALVEOLAR DAMAGE	1	582	6413	2.1349	0.30026	15.1796	0.3744	0.01559	FALSE
1	Reaction	DILATATION ATRIAL	1	1222	6413	1.01587	0.143	7.21667	0.62651	0.01559	FALSE
1	Reaction	DISCOMFORT	1	17548	6413	0.07069	0.00996	0.50179	2e-05	0.01559	TRUE
1	Reaction	DISTURBANCE IN ATTENTION	1	26222	6413	0.0473	0.00666	0.33579	0	0.01559	TRUE
1	Reaction	DIVERTICULAR PERFORATION	1	1182	6413	1.05028	0.14784	7.4613	0.61427	0.01559	FALSE
1	Reaction	DIVERTICULUM INTESTINAL	1	1871	6413	0.6633	0.0934	4.71075	1	0.01559	FALSE
1	Reaction	DRUG EFFECT DECREASED	1	43914	6413	0.02825	0.00398	0.2005	0	0.01559	TRUE
1	Reaction	DRUG HYPERSENSITIVITY	1	63335	6413	0.01958	0.00276	0.13902	0	0.01559	TRUE
1	Reaction	DRUG INEFFECTIVE FOR UNAPPROVED INDICATION	1	13558	6413	0.09149	0.01289	0.64949	0.00039	0.01559	TRUE
1	Reaction	DRUG PRESCRIBING ERROR	1	15356	6413	0.08078	0.01138	0.57343	9e-05	0.01559	TRUE
1	Reaction	DRUG TOXICITY	1	15104	6413	0.08213	0.01157	0.583	0.00014	0.01559	TRUE
1	Reaction	DRY THROAT	1	4369	6413	0.28397	0.04	2.01613	0.2785	0.01559	FALSE
1	Reaction	DUODENAL ULCER PERFORATION	1	815	6413	1.5238	0.21442	10.8293	0.48151	0.01559	FALSE
1	Reaction	DYSCHEZIA	1	271	6413	4.59398	0.64486	32.7277	0.19619	0.01559	FALSE
1	Reaction	DYSKINESIA	1	19876	6413	0.06241	0.00879	0.44301	0	0.01559	TRUE
1	Reaction	DYSLALIA	1	432	6413	2.8779	0.40452	20.4745	0.29401	0.01559	FALSE
1	Reaction	DYSMENORRHOEA	1	6017	6413	0.20618	0.02904	1.46375	0.10421	0.01559	FALSE
1	Reaction	DYSTONIA	1	12625	6413	0.09826	0.01384	0.69749	0.00079	0.01559	TRUE
1	Reaction	EAR CONGESTION	1	1155	6413	1.07485	0.1513	7.63602	0.60579	0.01559	FALSE
1	Reaction	EARLY SATIETY	1	1063	6413	1.16796	0.16439	8.29813	0.57544	0.01559	FALSE
1	Reaction	ECG SIGNS OF MYOCARDIAL ISCHAEMIA	1	144	6413	8.67396	1.21365	61.9925	0.10957	0.01559	FALSE
1	Reaction	ECZEMA ASTEATOTIC	1	181	6413	6.89098	0.96554	49.1805	0.13573	0.01559	FALSE
1	Reaction	ECZEMA NUMMULAR	1	158	6413	7.90048	1.1061	56.4301	0.11956	0.01559	FALSE
1	Reaction	EJACULATION FAILURE	1	1347	6413	0.92153	0.12973	6.54599	1	0.01559	FALSE
1	Reaction	ELECTROCARDIOGRAM Q WAVE ABNORMAL	1	141	6413	8.85983	1.23948	63.3302	0.10741	0.01559	FALSE
1	Reaction	ELECTROCARDIOGRAM QRS COMPLEX SHORTENED	1	200	6413	6.23304	0.8738	44.4618	0.14886	0.01559	FALSE
1	Reaction	ELECTROCARDIOGRAM T WAVE PEAKED	1	233	6413	5.34645	0.75004	38.1109	0.1712	0.01559	FALSE
1	Reaction	ELECTROLYTE DEPLETION	1	203	6413	6.14047	0.86089	43.7983	0.15092	0.01559	FALSE
1	Reaction	EMBOLISM ARTERIAL	1	819	6413	1.51635	0.21337	10.7763	0.48318	0.01559	FALSE
1	Reaction	EMBOLISM VENOUS	1	1116	6413	1.11244	0.15658	7.90334	0.5932	0.01559	FALSE
1	Reaction	EMOTIONAL DISORDER	1	18423	6413	0.06733	0.00949	0.47796	1e-05	0.01559	TRUE
1	Reaction	EMOTIONAL DISTRESS	1	28705	6413	0.04321	0.00609	0.30674	0	0.01559	TRUE
1	Reaction	ENDOSCOPIC RETROGRADE CHOLANGIOPANCREATOGRAPHY	1	79	6413	15.9023	2.21242	114.301	0.06168	0.01559	FALSE
1	Reaction	ENEMA ADMINISTRATION	1	42	6413	30.2531	4.16198	219.907	0.03328	0.01559	TRUE
1	Reaction	ENERGY INCREASED	1	2920	6413	0.42493	0.05984	3.01728	0.73663	0.01559	FALSE
1	Reaction	ENTERITIS INFECTIOUS	1	743	6413	1.67167	0.23519	11.8816	0.45053	0.01559	FALSE
1	Reaction	ENTEROBACTER SEPSIS	1	197	6413	6.32845	0.88711	45.1457	0.1468	0.01559	FALSE
1	Reaction	ENTEROCOCCAL INFECTION	1	2051	6413	0.60506	0.0852	4.29692	1	0.01559	FALSE
1	Reaction	ENTEROCOCCUS TEST POSITIVE	1	365	6413	3.40763	0.47878	24.2533	0.25484	0.01559	FALSE
1	Reaction	EOSINOPHILIC PNEUMONIA	1	1205	6413	1.03021	0.14502	7.31865	0.62136	0.01559	FALSE
1	Reaction	EPIDERMOLYSIS BULLOSA	1	123	6413	10.167	1.42089	72.7488	0.09437	0.01559	FALSE
1	Reaction	EPIDIDYMITIS	1	543	6413	2.28852	0.32182	16.2738	0.35442	0.01559	FALSE
1	Reaction	EPIGLOTTITIS	1	256	6413	4.86422	0.68264	34.6602	0.18642	0.01559	FALSE
1	Reaction	EPSTEIN-BARR VIRAEMIA	1	246	6413	5.06276	0.7104	36.0806	0.17984	0.01559	FALSE
1	Reaction	EPSTEIN-BARR VIRUS ANTIBODY POSITIVE	1	329	6413	3.78163	0.53117	26.9232	0.2329	0.01559	FALSE
1	Reaction	EPSTEIN-BARR VIRUS TEST	1	5	6413	310.094	34.6627	2774.11	0.00402	0.01559	TRUE
1	Reaction	EPSTEIN-BARR VIRUS TEST POSITIVE	1	372	6413	3.34333	0.46977	23.7945	0.25903	0.01559	FALSE
1	Reaction	EROSIVE OESOPHAGITIS	1	1136	6413	1.09284	0.15383	7.76396	0.5997	0.01559	FALSE
1	Reaction	ESCHERICHIA INFECTION	1	3183	6413	0.38981	0.0549	2.76782	0.53036	0.01559	FALSE
1	Reaction	ESCHERICHIA TEST POSITIVE	1	658	6413	1.88794	0.26558	13.421	0.41157	0.01559	FALSE
1	Reaction	EXOPHTHALMOS	1	909	6413	1.36605	0.19224	9.70704	0.51934	0.01559	FALSE
1	Reaction	EXOSTOSIS	1	4471	6413	0.27749	0.03908	1.97012	0.28133	0.01559	FALSE
1	Reaction	EXTRAPYRAMIDAL DISORDER	1	19183	6413	0.06466	0.00911	0.45902	1e-05	0.01559	TRUE
1	Reaction	EYE DISCHARGE	1	3509	6413	0.35358	0.0498	2.51053	0.54036	0.01559	FALSE
1	Reaction	EYE HAEMORRHAGE	1	6510	6413	0.19056	0.02684	1.35287	0.0743	0.01559	FALSE
1	Reaction	EYE IRRITATION	1	17794	6413	0.06971	0.00982	0.49486	2e-05	0.01559	TRUE
1	Reaction	EYE OEDEMA	1	1204	6413	1.03107	0.14514	7.32474	0.62105	0.01559	FALSE
1	Reaction	EYE OPERATION	1	1331	6413	0.93261	0.13129	6.62479	1	0.01559	FALSE
1	Reaction	EYELID FUNCTION DISORDER	1	436	6413	2.85144	0.40081	20.2858	0.29628	0.01559	FALSE
1	Reaction	EYELID OEDEMA	1	7661	6413	0.16193	0.02281	1.14956	0.02578	0.01559	TRUE
1	Reaction	Exposure during pregnancy	1	19372	6413	0.06403	0.00902	0.45454	1e-05	0.01559	TRUE
1	Reaction	Eye paraesthesia	1	17	6413	77.5235	10.2821	584.499	0.01361	0.01559	TRUE
1	Reaction	FACIAL BONES FRACTURE	1	2011	6413	0.6171	0.08689	4.38248	1	0.01559	FALSE
1	Reaction	FACIAL NERVE DISORDER	1	219	6413	5.6898	0.79799	40.5693	0.16179	0.01559	FALSE
1	Reaction	FACIAL PAIN	1	4035	6413	0.30748	0.04331	2.1831	0.39289	0.01559	FALSE
1	Reaction	FACTOR VII DEFICIENCY	1	35	6413	36.4816	4.99454	266.473	0.02781	0.01559	TRUE
1	Reaction	FAECAL INCONTINENCE	1	5128	6413	0.24193	0.03408	1.71761	0.2069	0.01559	FALSE
1	Reaction	FAECALOMA	1	2258	6413	0.54957	0.07739	3.90266	1	0.01559	FALSE
1	Reaction	FAECES HARD	1	1272	6413	0.97591	0.13738	6.93255	1	0.01559	FALSE
1	Reaction	FAILURE TO ANASTOMOSE	1	74	6413	16.9915	2.36194	122.234	0.05789	0.01559	FALSE
1	Reaction	FEAR	1	18049	6413	0.06873	0.00968	0.48786	2e-05	0.01559	TRUE
1	Reaction	FEAR OF DEATH	1	1166	6413	1.0647	0.14987	7.56386	0.60927	0.01559	FALSE
1	Reaction	FEBRILE INFECTION	1	399	6413	3.11652	0.43798	22.1763	0.27498	0.01559	FALSE
1	Reaction	FEELING OF DESPAIR	1	2013	6413	0.61649	0.08681	4.37812	1	0.01559	FALSE
1	Reaction	FIBRIN D DIMER INCREASED	1	1680	6413	0.73876	0.10402	5.24695	1	0.01559	FALSE
1	Reaction	FIBROMYALGIA	1	9416	6413	0.13174	0.01856	0.93525	0.0094	0.01559	TRUE
1	Reaction	FIBROSIS	1	1679	6413	0.7392	0.10408	5.25008	1	0.01559	FALSE
1	Reaction	FINGER AMPUTATION	1	411	6413	3.02531	0.42519	21.5257	0.28196	0.01559	FALSE
1	Reaction	FISTULA REPAIR	1	135	6413	9.25653	1.29457	66.1865	0.10309	0.01559	FALSE
1	Reaction	FOOD CRAVING	1	1742	6413	0.71245	0.10031	5.05999	1	0.01559	FALSE
1	Reaction	FOOD INTOLERANCE	1	1233	6413	1.0068	0.14172	7.15218	0.62981	0.01559	FALSE
1	Reaction	FOOD POISONING	1	1772	6413	0.70038	0.09862	4.97423	1	0.01559	FALSE
1	Reaction	FOOT AMPUTATION	1	459	6413	2.70824	0.38072	19.2649	0.3092	0.01559	FALSE
1	Reaction	FOREIGN BODY REACTION	1	110	6413	11.3796	1.58884	81.503	0.08483	0.01559	FALSE
1	Reaction	FRUCTOSE INTOLERANCE	1	32	6413	40.0121	5.46285	293.065	0.02546	0.01559	TRUE
1	Reaction	FUCHS' SYNDROME	1	29	6413	44.2991	6.02804	325.547	0.0231	0.01559	TRUE
1	Reaction	FUNGAEMIA	1	563	6413	2.20707	0.31039	15.6937	0.36474	0.01559	FALSE
1	Reaction	FUNGAL TEST POSITIVE	1	188	6413	6.63302	0.92958	47.3299	0.14059	0.01559	FALSE
1	Reaction	Faecal calprotectin increased	1	83	6413	15.1265	2.10578	108.659	0.0647	0.01559	FALSE
1	Reaction	Forced vital capacity decreased	1	112	6413	11.1746	1.56046	80.0216	0.08631	0.01559	FALSE
1	Reaction	GALLBLADDER DISORDER	1	12124	6413	0.10232	0.01441	0.72632	0.00112	0.01559	TRUE
1	Reaction	GAMMA RADIATION THERAPY	1	10	6413	137.82	17.4627	1087.7	0.00803	0.01559	TRUE
1	Reaction	GAMMA-GLUTAMYLTRANSFERASE ABNORMAL	1	248	6413	5.02176	0.70467	35.7873	0.18116	0.01559	FALSE
1	Reaction	GANGRENE	1	2800	6413	0.44315	0.06241	3.14668	0.73324	0.01559	FALSE
1	Reaction	GASTRIC CANCER	1	2976	6413	0.41693	0.05872	2.96047	0.7385	0.01559	FALSE
1	Reaction	GASTRIC PERFORATION	1	1164	6413	1.06653	0.15013	7.57688	0.60864	0.01559	FALSE
1	Reaction	GASTRODUODENITIS	1	201	6413	6.20188	0.86945	44.2384	0.14955	0.01559	FALSE
1	Reaction	GASTROENTERITIS BACTERIAL	1	154	6413	8.10703	1.13484	57.9149	0.11671	0.01559	FALSE
1	Reaction	GASTROENTERITIS EOSINOPHILIC	1	151	6413	8.26917	1.15739	59.0807	0.11458	0.01559	FALSE
1	Reaction	GASTROENTERITIS STAPHYLOCOCCAL	1	96	6413	13.0566	1.82058	93.6373	0.07445	0.01559	FALSE
1	Reaction	GASTROINTESTINAL EROSION	1	382	6413	3.25558	0.45747	23.1684	0.26498	0.01559	FALSE
1	Reaction	GASTROINTESTINAL FUNGAL INFECTION	1	185	6413	6.74117	0.94466	48.1057	0.13851	0.01559	FALSE
1	Reaction	GASTROINTESTINAL INJURY	1	1767	6413	0.70236	0.09889	4.98832	1	0.01559	FALSE
1	Reaction	GASTROINTESTINAL ISCHAEMIA	1	138	6413	9.05384	1.26643	64.7269	0.10525	0.01559	FALSE
1	Reaction	GASTROINTESTINAL OEDEMA	1	792	6413	1.56811	0.22064	11.1446	0.47181	0.01559	FALSE
1	Reaction	GASTROINTESTINAL PAIN	1	3996	6413	0.31048	0.04373	2.20442	0.39124	0.01559	FALSE
1	Reaction	GAZE PALSY	1	782	6413	1.58819	0.22346	11.2875	0.46753	0.01559	FALSE
1	Reaction	GENE MUTATION	1	424	6413	2.93233	0.41215	20.8626	0.28944	0.01559	FALSE
1	Reaction	GENE MUTATION IDENTIFICATION TEST POSITIVE	1	227	6413	5.48839	0.76986	39.127	0.16718	0.01559	FALSE
1	Reaction	GENERALISED NON-CONVULSIVE EPILEPSY	1	32	6413	40.0121	5.46285	293.065	0.02546	0.01559	TRUE
1	Reaction	GENITAL HAEMORRHAGE	1	6674	6413	0.18588	0.02618	1.31961	0.0512	0.01559	FALSE
1	Reaction	GINGIVAL BLEEDING	1	5909	6413	0.20995	0.02957	1.49051	0.10263	0.01559	FALSE
1	Reaction	GLIOSIS	1	265	6413	4.69839	0.65946	33.4742	0.1923	0.01559	FALSE
1	Reaction	GLOMERULAR FILTRATION RATE DECREASED	1	3462	6413	0.35839	0.05048	2.54463	0.53835	0.01559	FALSE
1	Reaction	GLUCOCORTICOID DEFICIENCY	1	23	6413	56.3807	7.60059	418.229	0.01836	0.01559	TRUE
1	Reaction	GRAFT VERSUS HOST DISEASE	1	3618	6413	0.34293	0.0483	2.43486	0.38257	0.01559	FALSE
1	Reaction	GRANULOMA SKIN	1	149	6413	8.38092	1.17292	59.8844	0.11315	0.01559	FALSE
1	Reaction	GRIP STRENGTH DECREASED	1	2297	6413	0.54023	0.07608	3.83634	1	0.01559	FALSE
1	Reaction	GROIN ABSCESS	1	372	6413	3.34333	0.46977	23.7945	0.25903	0.01559	FALSE
1	Reaction	GROWTH HORMONE DEFICIENCY	1	141	6413	8.85983	1.23948	63.3302	0.10741	0.01559	FALSE
1	Reaction	Granulomatous lymphadenitis	1	7	6413	206.729	24.8911	1716.96	0.00563	0.01559	TRUE
1	Reaction	HAEMANGIOMA	1	1180	6413	1.05206	0.14809	7.47397	0.61365	0.01559	FALSE
1	Reaction	HAEMATOCRIT INCREASED	1	817	6413	1.52007	0.21389	10.8028	0.48234	0.01559	FALSE
1	Reaction	HAEMOGLOBIN INCREASED	1	1470	6413	0.84437	0.11888	5.99752	1	0.01559	FALSE
1	Reaction	HAEMOGLOBINURIA	1	874	6413	1.42082	0.19994	10.0967	0.50558	0.01559	FALSE
1	Reaction	HAEMOLYTIC URAEMIC SYNDROME	1	1552	6413	0.79973	0.11259	5.68024	1	0.01559	FALSE
1	Reaction	HAEMORRHAGIC ASCITES	1	161	6413	7.75235	1.08549	55.3656	0.12168	0.01559	FALSE
1	Reaction	HAEMORRHOIDAL HAEMORRHAGE	1	2391	6413	0.51899	0.07308	3.6854	1	0.01559	FALSE
1	Reaction	HEART RATE ABNORMAL	1	1944	6413	0.63838	0.08989	4.53367	1	0.01559	FALSE
1	Reaction	HEART RATE DECREASED	1	13768	6413	0.0901	0.01269	0.63958	0.0004	0.01559	TRUE
1	Reaction	HELICOBACTER INFECTION	1	1808	6413	0.68643	0.09665	4.87508	1	0.01559	FALSE
1	Reaction	HEPATECTOMY	1	128	6413	9.76674	1.36538	69.8627	0.09801	0.01559	FALSE
1	Reaction	HEPATIC ARTERY OCCLUSION	1	49	6413	25.8412	3.5673	187.191	0.03872	0.01559	TRUE
1	Reaction	HEPATIC CYST	1	1765	6413	0.70316	0.09901	4.99398	1	0.01559	FALSE
1	Reaction	HEPATIC HAEMATOMA	1	244	6413	5.10443	0.71622	36.3787	0.17851	0.01559	FALSE
1	Reaction	HEPATIC HAEMORRHAGE	1	435	6413	2.85801	0.40173	20.3327	0.29571	0.01559	FALSE
1	Reaction	HEPATIC NEOPLASM	1	1752	6413	0.70838	0.09974	5.03108	1	0.01559	FALSE
1	Reaction	HEPATITIS C	1	7004	6413	0.17712	0.02495	1.25742	0.0529	0.01559	FALSE
1	Reaction	HEPATITIS E	1	280	6413	4.44579	0.62413	31.6683	0.202	0.01559	FALSE
1	Reaction	HEPATITIS FULMINANT	1	1656	6413	0.74947	0.10552	5.32308	1	0.01559	FALSE
1	Reaction	HEPATITIS INFECTIOUS	1	62	6413	20.334	2.81918	146.664	0.04874	0.01559	TRUE
1	Reaction	HEPATORENAL FAILURE	1	366	6413	3.39829	0.47747	24.1867	0.25544	0.01559	FALSE
1	Reaction	HERNIA	1	7480	6413	0.16585	0.02336	1.17738	0.03749	0.01559	TRUE
1	Reaction	HERNIA OBSTRUCTIVE	1	160	6413	7.8011	1.09228	55.716	0.12098	0.01559	FALSE
1	Reaction	HERNIA REPAIR	1	1303	6413	0.95267	0.13411	6.76737	1	0.01559	FALSE
1	Reaction	HERPES OESOPHAGITIS	1	134	6413	9.32613	1.30424	66.6878	0.10236	0.01559	FALSE
1	Reaction	HERPES SIMPLEX	1	3421	6413	0.36268	0.05108	2.57515	0.53673	0.01559	FALSE
1	Reaction	HIP ARTHROPLASTY	1	5514	6413	0.22499	0.03169	1.59732	0.14566	0.01559	FALSE
1	Reaction	HORDEOLUM	1	917	6413	1.35412	0.19056	9.62217	0.52243	0.01559	FALSE
1	Reaction	HUNGER	1	4877	6413	0.25438	0.03583	1.80604	0.20001	0.01559	FALSE
1	Reaction	HYPERADRENOCORTICISM	1	48	6413	26.391	3.64163	191.256	0.03794	0.01559	TRUE
1	Reaction	HYPERAESTHESIA	1	4362	6413	0.28442	0.04006	2.01937	0.27834	0.01559	FALSE
1	Reaction	HYPERCHLORHYDRIA	1	1662	6413	0.74676	0.10514	5.30384	1	0.01559	FALSE
1	Reaction	HYPERGAMMAGLOBULINAEMIA BENIGN MONOCLONAL	1	249	6413	5.00151	0.70184	35.6424	0.18182	0.01559	FALSE
1	Reaction	HYPERPROLACTINAEMIA	1	4602	6413	0.26959	0.03797	1.91401	0.28619	0.01559	FALSE
1	Reaction	HYPERTENSIVE CRISIS	1	4907	6413	0.25283	0.03561	1.79499	0.20061	0.01559	FALSE
1	Reaction	HYPERTRIGLYCERIDAEMIA	1	2513	6413	0.49378	0.06954	3.50634	0.72922	0.01559	FALSE
1	Reaction	HYPOACUSIS	1	10646	6413	0.11652	0.01641	0.82718	0.00321	0.01559	TRUE
1	Reaction	HYPOCHLORAEMIA	1	529	6413	2.3492	0.33034	16.7061	0.3471	0.01559	FALSE
1	Reaction	HYPOCOAGULABLE STATE	1	481	6413	2.58412	0.36331	18.3802	0.32134	0.01559	FALSE
1	Reaction	HYPOGONADISM	1	626	6413	1.9846	0.27915	14.1093	0.39619	0.01559	FALSE
1	Reaction	HYPOGONADISM MALE	1	135	6413	9.25653	1.29457	66.1865	0.10309	0.01559	FALSE
1	Reaction	HYPOKINESIA	1	6137	6413	0.20215	0.02847	1.43512	0.10659	0.01559	FALSE
1	Reaction	HYPOPROTEINAEMIA	1	913	6413	1.36006	0.1914	9.66442	0.52088	0.01559	FALSE
1	Reaction	HYPOTHROMBINAEMIA	1	9	6413	155.047	19.3943	1239.52	0.00723	0.01559	TRUE
1	Reaction	HYPOTONIA	1	5566	6413	0.22289	0.0314	1.5824	0.14688	0.01559	FALSE
1	Reaction	HYPOVOLAEMIA	1	3366	6413	0.36861	0.05191	2.61725	0.5348	0.01559	FALSE
1	Reaction	Haemorrhoids thrombosed	1	72	6413	17.4701	2.42756	125.724	0.05637	0.01559	FALSE
1	Reaction	Hepatic hypertrophy	1	8	6413	177.197	21.8036	1440.07	0.00643	0.01559	TRUE
1	Reaction	Hernia perforation	1	26	6413	49.615	6.72363	366.119	0.02073	0.01559	TRUE
1	Reaction	Hyperferritinaemia	1	52	6413	24.3211	3.36145	175.97	0.04104	0.01559	TRUE
1	Reaction	ILEAL PERFORATION	1	362	6413	3.43594	0.48274	24.4554	0.25303	0.01559	FALSE
1	Reaction	ILEOCOLECTOMY	1	47	6413	26.9647	3.71913	195.501	0.03717	0.01559	TRUE
1	Reaction	ILEOCOLOSTOMY	1	17	6413	77.5235	10.2821	584.499	0.01361	0.01559	TRUE
1	Reaction	ILL-DEFINED DISORDER	1	14872	6413	0.08341	0.01175	0.5921	0.00021	0.01559	TRUE
1	Reaction	ILLUSION	1	772	6413	1.60879	0.22636	11.4341	0.46322	0.01559	FALSE
1	Reaction	INCOHERENT	1	3989	6413	0.31103	0.04381	2.20829	0.39096	0.01559	FALSE
1	Reaction	INCORRECT DRUG ADMINISTRATION DURATION	1	23699	6413	0.05234	0.00737	0.37154	0	0.01559	TRUE
1	Reaction	INCORRECT DRUG ADMINISTRATION RATE	1	1335	6413	0.92982	0.1309	6.60491	1	0.01559	FALSE
1	Reaction	INCORRECT STORAGE OF DRUG	1	1807	6413	0.68681	0.09671	4.87778	1	0.01559	FALSE
1	Reaction	INCREASED UPPER AIRWAY SECRETION	1	3993	6413	0.31072	0.04376	2.20607	0.39112	0.01559	FALSE
1	Reaction	INFERIOR VENA CAVAL OCCLUSION	1	77	6413	16.3207	2.2699	117.347	0.06017	0.01559	FALSE
1	Reaction	INFLAMMATORY MARKER INCREASED	1	1028	6413	1.20777	0.16999	8.5812	0.5633	0.01559	FALSE
1	Reaction	INFUSION SITE INFECTION	1	779	6413	1.59431	0.22432	11.3311	0.46624	0.01559	FALSE
1	Reaction	INFUSION SITE SWELLING	1	1131	6413	1.09768	0.15451	7.79834	0.59809	0.01559	FALSE
1	Reaction	INGUINAL HERNIA	1	2753	6413	0.45072	0.06347	3.20044	0.73217	0.01559	FALSE
1	Reaction	INJECTION SITE ERYTHEMA	1	67543	6413	0.01836	0.00259	0.13036	0	0.01559	TRUE
1	Reaction	INJECTION SITE INDURATION	1	7267	6413	0.17071	0.02405	1.2119	0.0365	0.01559	TRUE
1	Reaction	INJECTION SITE PRURITUS	1	33668	6413	0.03684	0.00519	0.26152	0	0.01559	TRUE
1	Reaction	INJECTION SITE SWELLING	1	34257	6413	0.03621	0.0051	0.25703	0	0.01559	TRUE
1	Reaction	INTENTIONAL DRUG MISUSE	1	22058	6413	0.05624	0.00792	0.39919	0	0.01559	TRUE
1	Reaction	INTESTINAL MUCOSAL HYPERTROPHY	1	146	6413	8.55431	1.19703	61.1317	0.111	0.01559	FALSE
1	Reaction	INTESTINAL RESECTION	1	2019	6413	0.61466	0.08655	4.3651	1	0.01559	FALSE
1	Reaction	INTRACARDIAC MASS	1	68	6413	18.5131	2.57039	133.339	0.05333	0.01559	FALSE
1	Reaction	INTRAOCULAR PRESSURE INCREASED	1	6179	6413	0.20077	0.02828	1.42536	0.07199	0.01559	FALSE
1	Reaction	INTRAVENTRICULAR HAEMORRHAGE	1	1227	6413	1.01173	0.14242	7.18721	0.62801	0.01559	FALSE
1	Reaction	IRRITABLE BOWEL SYNDROME	1	7817	6413	0.1587	0.02235	1.12661	0.02601	0.01559	TRUE
1	Reaction	ISCHAEMIC CARDIOMYOPATHY	1	2357	6413	0.52648	0.07414	3.7386	1	0.01559	FALSE
1	Reaction	ISCHAEMIC NEUROPATHY	1	43	6413	29.5328	4.06517	214.55	0.03406	0.01559	TRUE
1	Reaction	ITCHING SCAR	1	48	6413	26.391	3.64163	191.256	0.03794	0.01559	TRUE
1	Reaction	Incarcerated umbilical hernia	1	34	6413	37.5871	5.14146	274.784	0.02703	0.01559	TRUE
1	Reaction	Intensive care unit acquired weakness	1	37	6413	34.4549	4.72452	251.272	0.02938	0.01559	TRUE
1	Reaction	Intentional product use issue	1	8649	6413	0.14343	0.0202	1.01821	0.01291	0.01559	TRUE
1	Reaction	Intestinal sepsis	1	29	6413	44.2991	6.02804	325.547	0.0231	0.01559	TRUE
1	Reaction	Intracranial mass	1	154	6413	8.10703	1.13484	57.9149	0.11671	0.01559	FALSE
1	Reaction	Invasive ductal breast carcinoma	1	957	6413	1.29746	0.1826	9.21916	0.53758	0.01559	FALSE
1	Reaction	KERATOACANTHOMA	1	288	6413	4.32187	0.60679	30.7825	0.20713	0.01559	FALSE
1	Reaction	KERATOSIS FOLLICULAR	1	32	6413	40.0121	5.46285	293.065	0.02546	0.01559	TRUE
1	Reaction	KLEBSIELLA BACTERAEMIA	1	280	6413	4.44579	0.62413	31.6683	0.202	0.01559	FALSE
1	Reaction	KLEBSIELLA INFECTION	1	1752	6413	0.70838	0.09974	5.03108	1	0.01559	FALSE
1	Reaction	KLEBSIELLA TEST POSITIVE	1	333	6413	3.73607	0.52479	26.5979	0.23537	0.01559	FALSE
1	Reaction	LABYRINTHITIS	1	1460	6413	0.85015	0.11969	6.03866	1	0.01559	FALSE
1	Reaction	LACUNAR INFARCTION	1	1783	6413	0.69606	0.09801	4.94351	1	0.01559	FALSE
1	Reaction	LARGE GRANULAR LYMPHOCYTOSIS	1	116	6413	10.7859	1.50665	77.2146	0.08925	0.01559	FALSE
1	Reaction	LARGE INTESTINAL OBSTRUCTION	1	708	6413	1.75442	0.24682	12.4706	0.43481	0.01559	FALSE
1	Reaction	LARYNGOSPASM	1	1449	6413	0.85661	0.1206	6.08456	1	0.01559	FALSE
1	Reaction	LATENT AUTOIMMUNE DIABETES IN ADULTS	1	49	6413	25.8412	3.5673	187.191	0.03872	0.01559	TRUE
1	Reaction	LEG AMPUTATION	1	2043	6413	0.60743	0.08553	4.31377	1	0.01559	FALSE
1	Reaction	LEUKOERYTHROBLASTIC ANAEMIA	1	23	6413	56.3807	7.60059	418.229	0.01836	0.01559	TRUE
1	Reaction	LIMB DISCOMFORT	1	10410	6413	0.11916	0.01679	0.84593	0.00471	0.01559	TRUE
1	Reaction	LIP OEDEMA	1	1628	6413	0.76237	0.10734	5.41475	1	0.01559	FALSE
1	Reaction	LIPASE	1	11	6413	124.038	15.8801	968.844	0.00883	0.01559	TRUE
1	Reaction	LIVER OPERATION	1	132	6413	9.46852	1.324	67.7136	0.10091	0.01559	FALSE
1	Reaction	LOBAR PNEUMONIA	1	2140	6413	0.57989	0.08166	4.11806	1	0.01559	FALSE
1	Reaction	LOCALISED INFECTION	1	9482	6413	0.13083	0.01843	0.92874	0.00953	0.01559	TRUE
1	Reaction	LOOSE TOOTH	1	1791	6413	0.69295	0.09757	4.9214	1	0.01559	FALSE
1	Reaction	LOW DENSITY LIPOPROTEIN INCREASED	1	3394	6413	0.36557	0.05149	2.59565	0.53575	0.01559	FALSE
1	Reaction	LOWER LIMB FRACTURE	1	7540	6413	0.16453	0.02318	1.16801	0.03793	0.01559	TRUE
1	Reaction	LUNG ADENOCARCINOMA	1	1235	6413	1.00517	0.1415	7.14058	0.6304	0.01559	FALSE
1	Reaction	LUPUS-LIKE SYNDROME	1	3835	6413	0.32352	0.04557	2.29701	0.38587	0.01559	FALSE
1	Reaction	LYMPHADENECTOMY	1	494	6413	2.51597	0.35375	17.8945	0.32842	0.01559	FALSE
1	Reaction	LYMPHADENITIS	1	1031	6413	1.20425	0.16949	8.55618	0.56435	0.01559	FALSE
1	Reaction	LYMPHOCYTE COUNT ABNORMAL	1	302	6413	4.12085	0.57866	29.3461	0.21603	0.01559	FALSE
1	Reaction	LYMPHOPROLIFERATIVE DISORDER	1	1082	6413	1.14743	0.1615	8.15215	0.5819	0.01559	FALSE
1	Reaction	LYMPHOSTASIS	1	25	6413	51.6823	6.99258	381.985	0.01995	0.01559	TRUE
1	Reaction	Limb mass	1	250	6413	4.98143	0.69903	35.4987	0.18247	0.01559	FALSE
1	Reaction	MACULAR FIBROSIS	1	329	6413	3.78163	0.53117	26.9232	0.2329	0.01559	FALSE
1	Reaction	MALIGNANT MESENTERIC NEOPLASM	1	26	6413	49.615	6.72363	366.119	0.02073	0.01559	TRUE
1	Reaction	MARROW HYPERPLASIA	1	473	6413	2.62791	0.36945	18.6923	0.31695	0.01559	FALSE
1	Reaction	MASTICATION DISORDER	1	1404	6413	0.88409	0.12446	6.27986	1	0.01559	FALSE
1	Reaction	MASTOIDITIS	1	424	6413	2.93233	0.41215	20.8626	0.28944	0.01559	FALSE
1	Reaction	MATERNAL EXPOSURE BEFORE PREGNANCY	1	1917	6413	0.64738	0.09116	4.59759	1	0.01559	FALSE
1	Reaction	MEAN CELL HAEMOGLOBIN CONCENTRATION DECREASED	1	334	6413	3.72485	0.52322	26.5178	0.23599	0.01559	FALSE
1	Reaction	MEDICAL DEVICE COMPLICATION	1	8381	6413	0.14802	0.02085	1.05078	0.0186	0.01559	TRUE
1	Reaction	MEDICAL DEVICE DISCOMFORT	1	2001	6413	0.62019	0.08733	4.4044	1	0.01559	FALSE
1	Reaction	MENINGIOMA	1	1289	6413	0.96302	0.13557	6.84098	1	0.01559	FALSE
1	Reaction	MENINGITIS NONINFECTIVE	1	23	6413	56.3807	7.60059	418.229	0.01836	0.01559	TRUE
1	Reaction	MENINGITIS STAPHYLOCOCCAL	1	75	6413	16.7618	2.33044	120.56	0.05865	0.01559	FALSE
1	Reaction	MENTAL DISORDER	1	19371	6413	0.06404	0.00902	0.45457	1e-05	0.01559	TRUE
1	Reaction	MESENTERIC ARTERY EMBOLISM	1	60	6413	21.0233	2.91317	151.718	0.0472	0.01559	TRUE
1	Reaction	MESENTERIC PANNICULITIS	1	96	6413	13.0566	1.82058	93.6373	0.07445	0.01559	FALSE
1	Reaction	MESENTERIC VEIN THROMBOSIS	1	525	6413	2.36713	0.33286	16.8339	0.34499	0.01559	FALSE
1	Reaction	METASTASES TO ABDOMINAL CAVITY	1	232	6413	5.36959	0.75327	38.2765	0.17053	0.01559	FALSE
1	Reaction	METASTASES TO ABDOMINAL WALL	1	68	6413	18.5131	2.57039	133.339	0.05333	0.01559	FALSE
1	Reaction	METASTASES TO BLADDER	1	106	6413	11.8131	1.6488	84.6367	0.08188	0.01559	FALSE
1	Reaction	METASTASES TO CHEST WALL	1	129	6413	9.69043	1.3548	69.3127	0.09874	0.01559	FALSE
1	Reaction	METASTASES TO EYE	1	64	6413	19.6885	2.73107	141.936	0.05027	0.01559	FALSE
1	Reaction	METASTASES TO GALLBLADDER	1	36	6413	35.4393	4.85578	258.649	0.0286	0.01559	TRUE
1	Reaction	METASTASES TO GASTROINTESTINAL TRACT	1	152	6413	8.21441	1.14977	58.6869	0.11529	0.01559	FALSE
1	Reaction	METASTASES TO HEART	1	122	6413	10.251	1.43254	73.3549	0.09364	0.01559	FALSE
1	Reaction	METASTASES TO KIDNEY	1	274	6413	4.5435	0.6378	32.3668	0.19814	0.01559	FALSE
1	Reaction	METASTASES TO PERITONEUM	1	878	6413	1.41434	0.19903	10.0505	0.50718	0.01559	FALSE
1	Reaction	METASTASES TO PITUITARY GLAND	1	16	6413	82.6917	10.9243	625.938	0.01281	0.01559	TRUE
1	Reaction	METASTASES TO RETROPERITONEUM	1	57	6413	22.1496	3.06653	159.986	0.0449	0.01559	TRUE
1	Reaction	METASTASES TO SMALL INTESTINE	1	96	6413	13.0566	1.82058	93.6373	0.07445	0.01559	FALSE
1	Reaction	METASTASES TO SOFT TISSUE	1	76	6413	16.5383	2.29977	118.932	0.05941	0.01559	FALSE
1	Reaction	METASTASES TO SPLEEN	1	193	6413	6.46029	0.9055	46.0911	0.14404	0.01559	FALSE
1	Reaction	METASTASES TO THE MEDIASTINUM	1	169	6413	7.38319	1.0341	52.7138	0.12733	0.01559	FALSE
1	Reaction	METASTATIC LYMPHOMA	1	116	6413	10.7859	1.50665	77.2146	0.08925	0.01559	FALSE
1	Reaction	MICROANGIOPATHY	1	519	6413	2.39455	0.33671	17.0293	0.34181	0.01559	FALSE
1	Reaction	MICROCYTIC ANAEMIA	1	1061	6413	1.17017	0.1647	8.3138	0.57476	0.01559	FALSE
1	Reaction	MICROCYTOSIS	1	139	6413	8.98823	1.25732	64.2545	0.10597	0.01559	FALSE
1	Reaction	MILIA	1	170	6413	7.3395	1.02802	52.4001	0.12803	0.01559	FALSE
1	Reaction	MOLE EXCISION	1	151	6413	8.26917	1.15739	59.0807	0.11458	0.01559	FALSE
1	Reaction	MONOCYTE COUNT INCREASED	1	1243	6413	0.99869	0.14058	7.09455	1	0.01559	FALSE
1	Reaction	MONOCYTOSIS	1	281	6413	4.42991	0.62191	31.5547	0.20265	0.01559	FALSE
1	Reaction	MOTION SICKNESS	1	882	6413	1.40792	0.19813	10.0049	0.50876	0.01559	FALSE
1	Reaction	MOTOR NEURONE DISEASE	1	231	6413	5.39294	0.75653	38.4437	0.16986	0.01559	FALSE
1	Reaction	MULTI-ORGAN DISORDER	1	1357	6413	0.91473	0.12877	6.49768	1	0.01559	FALSE
1	Reaction	MULTIPLE FRACTURES	1	3731	6413	0.33254	0.04684	2.36107	0.38369	0.01559	FALSE
1	Reaction	MUSCLE ATROPHY	1	5529	6413	0.22438	0.03161	1.59299	0.146	0.01559	FALSE
1	Reaction	MUSCLE FLAP OPERATION	1	17	6413	77.5235	10.2821	584.499	0.01361	0.01559	TRUE
1	Reaction	MUSCULAR SARCOIDOSIS	1	2	6413	1240.38	77.5885	19829.4	0.00161	0.01559	TRUE
1	Reaction	MUSCULOSKELETAL DISORDER	1	8548	6413	0.14512	0.02044	1.03024	0.01922	0.01559	TRUE
1	Reaction	MYDRIASIS	1	6128	6413	0.20244	0.02852	1.43723	0.10639	0.01559	FALSE
1	Reaction	MYELODYSPLASTIC SYNDROME	1	7533	6413	0.16468	0.0232	1.1691	0.03787	0.01559	TRUE
1	Reaction	MYELOPATHY	1	727	6413	1.70851	0.24037	12.1438	0.4434	0.01559	FALSE
1	Reaction	MYOCARDIAL ISCHAEMIA	1	8542	6413	0.14523	0.02046	1.03097	0.01919	0.01559	TRUE
1	Reaction	MYOGLOBIN BLOOD INCREASED	1	956	6413	1.29882	0.18279	9.22882	0.5372	0.01559	FALSE
1	Reaction	MYOPIA	1	1159	6413	1.07114	0.15077	7.60962	0.60706	0.01559	FALSE
1	Reaction	Meningoencephalitis viral	1	24	6413	53.9294	7.28392	399.287	0.01916	0.01559	TRUE
1	Reaction	Miliaria	1	505	6413	2.46106	0.34604	17.5032	0.33434	0.01559	FALSE
1	Reaction	Mucosal toxicity	1	65	6413	19.3809	2.68904	139.685	0.05103	0.01559	FALSE
1	Reaction	Myocardial necrosis marker increased	1	356	6413	3.49402	0.49088	24.8699	0.24941	0.01559	FALSE
1	Reaction	NAIL BED INFECTION	1	118	6413	10.6015	1.48111	75.8837	0.09071	0.01559	FALSE
1	Reaction	NAIL DISCOLOURATION	1	1635	6413	0.7591	0.10688	5.39153	1	0.01559	FALSE
1	Reaction	NAIL DISORDER	1	3124	6413	0.39717	0.05594	2.82012	0.52964	0.01559	FALSE
1	Reaction	NASAL SEPTUM PERFORATION	1	362	6413	3.43594	0.48274	24.4554	0.25303	0.01559	FALSE
1	Reaction	NECROSIS	1	3180	6413	0.39018	0.05495	2.77043	0.53032	0.01559	FALSE
1	Reaction	NERVE INJURY	1	5130	6413	0.24184	0.03406	1.71694	0.20697	0.01559	FALSE
1	Reaction	NERVE ROOT COMPRESSION	1	450	6413	2.76253	0.38834	19.6519	0.30418	0.01559	FALSE
1	Reaction	NEURITIS	1	750	6413	1.65604	0.233	11.7704	0.45362	0.01559	FALSE
1	Reaction	NEUROBORRELIOSIS	1	46	6413	27.5639	3.8	199.939	0.03639	0.01559	TRUE
1	Reaction	NEUROLOGICAL DECOMPENSATION	1	910	6413	1.36455	0.19203	9.69635	0.51972	0.01559	FALSE
1	Reaction	NEUROLYSIS	1	16	6413	82.6917	10.9243	625.938	0.01281	0.01559	TRUE
1	Reaction	NEUROSENSORY HYPOACUSIS	1	44	6413	28.8459	3.97276	209.449	0.03484	0.01559	TRUE
1	Reaction	NEUROSURGERY	1	70	6413	17.9765	2.49693	129.42	0.05485	0.01559	FALSE
1	Reaction	NEUROTOXICITY	1	4500	6413	0.2757	0.03883	1.95741	0.28229	0.01559	FALSE
1	Reaction	NEUTROPENIC SEPSIS	1	3447	6413	0.35995	0.05069	2.55571	0.53774	0.01559	FALSE
1	Reaction	NEUTROPHIL COUNT	1	109	6413	11.485	1.60342	82.2645	0.08409	0.01559	FALSE
1	Reaction	NEUTROPHIL COUNT INCREASED	1	5232	6413	0.23712	0.0334	1.68345	0.14173	0.01559	FALSE
1	Reaction	NEUTROPHILIC PANNICULITIS	1	33	6413	38.7617	5.29729	283.631	0.02624	0.01559	TRUE
1	Reaction	NIGHTMARE	1	18234	6413	0.06803	0.00958	0.48291	1e-05	0.01559	TRUE
1	Reaction	NO ADVERSE EVENT	1	47919	6413	0.02589	0.00365	0.18374	0	0.01559	TRUE
1	Reaction	NOCARDIOSIS	1	715	6413	1.73722	0.2444	12.3481	0.43799	0.01559	FALSE
1	Reaction	NON-HODGKIN'S LYMPHOMA	1	2631	6413	0.47163	0.06642	3.34896	0.73011	0.01559	FALSE
1	Reaction	NONINFECTIOUS MYELITIS	1	9	6413	155.047	19.3943	1239.52	0.00723	0.01559	TRUE
1	Reaction	NONSPECIFIC REACTION	1	2173	6413	0.57108	0.08042	4.05546	1	0.01559	FALSE
1	Reaction	NORMAL PRESSURE HYDROCEPHALUS	1	236	6413	5.27819	0.7405	37.6223	0.1732	0.01559	FALSE
1	Reaction	New daily persistent headache	1	11	6413	124.038	15.8801	968.844	0.00883	0.01559	TRUE
1	Reaction	Noninfective gingivitis	1	307	6413	4.05352	0.56923	28.8651	0.21918	0.01559	FALSE
1	Reaction	OBESITY	1	7275	6413	0.17052	0.02402	1.21057	0.03652	0.01559	TRUE
1	Reaction	OBSESSIVE-COMPULSIVE DISORDER	1	4003	6413	0.30994	0.04365	2.20056	0.39153	0.01559	FALSE
1	Reaction	OBSTRUCTION	1	1105	6413	1.12353	0.15814	7.98216	0.58957	0.01559	FALSE
1	Reaction	OBSTRUCTION GASTRIC	1	487	6413	2.55221	0.35883	18.1528	0.32462	0.01559	FALSE
1	Reaction	OBSTRUCTIVE AIRWAYS DISORDER	1	3043	6413	0.40775	0.05743	2.89524	0.52925	0.01559	FALSE
1	Reaction	OBSTRUCTIVE UROPATHY	1	434	6413	2.86461	0.40265	20.3797	0.29514	0.01559	FALSE
1	Reaction	OCCULT BLOOD POSITIVE	1	1385	6413	0.89623	0.12617	6.36613	1	0.01559	FALSE
1	Reaction	OCULAR HYPERTENSION	1	568	6413	2.18761	0.30766	15.555	0.3673	0.01559	FALSE
1	Reaction	ODYNOPHAGIA	1	2587	6413	0.47965	0.06755	3.40596	0.72965	0.01559	FALSE
1	Reaction	OESOPHAGEAL HAEMORRHAGE	1	690	6413	1.80025	0.25326	12.7968	0.42655	0.01559	FALSE
1	Reaction	OESOPHAGEAL PERFORATION	1	363	6413	3.42645	0.48141	24.3877	0.25364	0.01559	FALSE
1	Reaction	OESOPHAGEAL STENOSIS	1	1349	6413	0.92016	0.12954	6.53627	1	0.01559	FALSE
1	Reaction	OESOPHAGEAL ULCER	1	2254	6413	0.55054	0.07753	3.90959	1	0.01559	FALSE
1	Reaction	OESTRADIOL DECREASED	1	226	6413	5.51278	0.77327	39.3017	0.16651	0.01559	FALSE
1	Reaction	OLIGURIA	1	3244	6413	0.38248	0.05387	2.71574	0.53148	0.01559	FALSE
1	Reaction	ONCOLOGIC COMPLICATION	1	378	6413	3.29012	0.46231	23.4148	0.2626	0.01559	FALSE
1	Reaction	OPTIC ISCHAEMIC NEUROPATHY	1	1556	6413	0.79767	0.1123	5.66562	1	0.01559	FALSE
1	Reaction	ORBITAL OEDEMA	1	285	6413	4.36752	0.61318	31.1088	0.20521	0.01559	FALSE
1	Reaction	ORBITAL PSEUDOTUMOUR	1	17	6413	77.5235	10.2821	584.499	0.01361	0.01559	TRUE
1	Reaction	ORGAN FAILURE	1	2808	6413	0.44189	0.06223	3.13771	0.73344	0.01559	FALSE
1	Reaction	ORTHOSTATIC HYPERTENSION	1	175	6413	7.1286	0.99864	50.8859	0.13154	0.01559	FALSE
1	Reaction	OSCILLOPSIA	1	145	6413	8.61372	1.20528	61.5591	0.11028	0.01559	FALSE
1	Reaction	OSTEOARTHRITIS	1	18125	6413	0.06844	0.00964	0.48582	2e-05	0.01559	TRUE
1	Reaction	OSTEOCHONDROSIS	1	522	6413	2.38076	0.33477	16.931	0.3434	0.01559	FALSE
1	Reaction	OTITIS EXTERNA	1	589	6413	2.10948	0.29669	14.9986	0.37792	0.01559	FALSE
1	Reaction	OTITIS MEDIA	1	1715	6413	0.72367	0.10189	5.13974	1	0.01559	FALSE
1	Reaction	OTOSCLEROSIS	1	76	6413	16.5383	2.29977	118.932	0.05941	0.01559	FALSE
1	Reaction	OXYGEN SUPPLEMENTATION	1	796	6413	1.56022	0.21953	11.0885	0.47351	0.01559	FALSE
1	Reaction	Oesophageal motility disorder	1	93	6413	13.4823	1.87932	96.7231	0.07221	0.01559	FALSE
1	Reaction	Oropharyngeal squamous cell carcinoma	1	27	6413	47.7068	6.4746	351.518	0.02152	0.01559	TRUE
1	Reaction	PAIN IN JAW	1	12982	6413	0.09555	0.01346	0.67831	0.00055	0.01559	TRUE
1	Reaction	PAINFUL RESPIRATION	1	1282	6413	0.96829	0.13631	6.87839	1	0.01559	FALSE
1	Reaction	PALATAL DISORDER	1	393	6413	3.16422	0.44466	22.5166	0.27147	0.01559	FALSE
1	Reaction	PALLOR	1	12130	6413	0.10227	0.01441	0.72596	0.00112	0.01559	TRUE
1	Reaction	PALMAR ERYTHEMA	1	481	6413	2.58412	0.36331	18.3802	0.32134	0.01559	FALSE
1	Reaction	PANCREATIC CARCINOMA	1	6924	6413	0.17917	0.02524	1.27195	0.05222	0.01559	FALSE
1	Reaction	PANCREATIC CYST	1	792	6413	1.56811	0.22064	11.1446	0.47181	0.01559	FALSE
1	Reaction	PANCREATIC DISORDER	1	2123	6413	0.58453	0.08231	4.15106	1	0.01559	FALSE
1	Reaction	PANIC DISORDER	1	2004	6413	0.61926	0.0872	4.3978	1	0.01559	FALSE
1	Reaction	PAPILLITIS	1	78	6413	16.1088	2.24079	115.804	0.06092	0.01559	FALSE
1	Reaction	PARANEOPLASTIC RETINOPATHY	1	5	6413	310.094	34.6627	2774.11	0.00402	0.01559	TRUE
1	Reaction	PARANEOPLASTIC SYNDROME	1	381	6413	3.26415	0.45867	23.2295	0.26439	0.01559	FALSE
1	Reaction	PARASITE STOOL TEST POSITIVE	1	25	6413	51.6823	6.99258	381.985	0.01995	0.01559	TRUE
1	Reaction	PARATHYROID HORMONE-RELATED PROTEIN INCREASED	1	8	6413	177.197	21.8036	1440.07	0.00643	0.01559	TRUE
1	Reaction	PAROTITIS	1	598	6413	2.07768	0.29222	14.7721	0.38241	0.01559	FALSE
1	Reaction	PARVOVIRUS INFECTION	1	199	6413	6.26452	0.87819	44.6875	0.14817	0.01559	FALSE
1	Reaction	PELIOSIS HEPATIS	1	60	6413	21.0233	2.91317	151.718	0.0472	0.01559	TRUE
1	Reaction	PELVIC ABSCESS	1	549	6413	2.26346	0.31831	16.0953	0.35754	0.01559	FALSE
1	Reaction	PELVIC INFECTION	1	234	6413	5.3235	0.74683	37.9466	0.17187	0.01559	FALSE
1	Reaction	PELVIC NEOPLASM	1	150	6413	8.32467	1.1651	59.4798	0.11386	0.01559	FALSE
1	Reaction	PELVIC PAIN	1	10291	6413	0.12054	0.01698	0.85572	0.00461	0.01559	TRUE
1	Reaction	PELVIC VENOUS THROMBOSIS	1	931	6413	1.33374	0.1877	9.47717	0.52778	0.01559	FALSE
1	Reaction	PERFORATION BILE DUCT	1	57	6413	22.1496	3.06653	159.986	0.0449	0.01559	TRUE
1	Reaction	PERIARTHRITIS	1	1037	6413	1.19727	0.16851	8.50658	0.56645	0.01559	FALSE
1	Reaction	PERICARDIAL DRAINAGE	1	146	6413	8.55431	1.19703	61.1317	0.111	0.01559	FALSE
1	Reaction	PERIORBITAL CELLULITIS	1	188	6413	6.63302	0.92958	47.3299	0.14059	0.01559	FALSE
1	Reaction	PERIPHERAL COLDNESS	1	6485	6413	0.1913	0.02695	1.35808	0.07399	0.01559	FALSE
1	Reaction	PERIPHERAL NERVE INFECTION	1	23	6413	56.3807	7.60059	418.229	0.01836	0.01559	TRUE
1	Reaction	PERITONEAL ADHESIONS	1	201	6413	6.20188	0.86945	44.2384	0.14955	0.01559	FALSE
1	Reaction	PERITONEAL HAEMORRHAGE	1	1067	6413	1.16358	0.16377	8.26696	0.57681	0.01559	FALSE
1	Reaction	PERITONEAL NECROSIS	1	12	6413	112.761	14.5599	873.302	0.00962	0.01559	TRUE
1	Reaction	PERITONITIS BACTERIAL	1	6519	6413	0.1903	0.02681	1.351	0.07442	0.01559	FALSE
1	Reaction	PETECHIAE	1	4895	6413	0.25345	0.0357	1.7994	0.20036	0.01559	FALSE
1	Reaction	PHARYNGITIS STREPTOCOCCAL	1	4269	6413	0.29062	0.04093	2.06338	0.27659	0.01559	FALSE
1	Reaction	PHARYNGOTONSILLITIS	1	92	6413	13.6305	1.89975	97.7974	0.07146	0.01559	FALSE
1	Reaction	PHLEBITIS	1	3029	6413	0.40964	0.05769	2.90863	0.74043	0.01559	FALSE
1	Reaction	PHRENIC NERVE PARALYSIS	1	75	6413	16.7618	2.33044	120.56	0.05865	0.01559	FALSE
1	Reaction	PIGMENTATION DISORDER	1	2513	6413	0.49378	0.06954	3.50634	0.72922	0.01559	FALSE
1	Reaction	PITTING OEDEMA	1	705	6413	1.7619	0.24787	12.5238	0.43344	0.01559	FALSE
1	Reaction	PLEURITIC PAIN	1	1771	6413	0.70078	0.09867	4.97704	1	0.01559	FALSE
1	Reaction	PLEUROPERICARDITIS	1	165	6413	7.56327	1.05917	54.0072	0.12451	0.01559	FALSE
1	Reaction	PNEUMOCEPHALUS	1	156	6413	8.00242	1.12029	57.1629	0.11814	0.01559	FALSE
1	Reaction	PNEUMOCOCCAL INFECTION	1	265	6413	4.69839	0.65946	33.4742	0.1923	0.01559	FALSE
1	Reaction	PNEUMOCYSTIS JIROVECI PNEUMONIA	1	2438	6413	0.50898	0.07168	3.61429	1	0.01559	FALSE
1	Reaction	PNEUMOCYSTIS TEST POSITIVE	1	28	6413	45.9398	6.24335	338.035	0.02231	0.01559	TRUE
1	Reaction	PNEUMONIA FUNGAL	1	1054	6413	1.17794	0.16579	8.36912	0.57235	0.01559	FALSE
1	Reaction	PNEUMONIA KLEBSIELLA	1	716	6413	1.73479	0.24406	12.3308	0.43844	0.01559	FALSE
1	Reaction	PNEUMONIA PRIMARY ATYPICAL	1	664	6413	1.87085	0.26318	13.2994	0.41441	0.01559	FALSE
1	Reaction	PNEUMONIA STREPTOCOCCAL	1	533	6413	2.33153	0.32786	16.5803	0.3492	0.01559	FALSE
1	Reaction	PNEUMONIA VIRAL	1	1025	6413	1.2113	0.17049	8.60636	0.56224	0.01559	FALSE
1	Reaction	POLYMYALGIA RHEUMATICA	1	1134	6413	1.09477	0.1541	7.77767	0.59906	0.01559	FALSE
1	Reaction	PORTAL HYPERTENSION	1	1499	6413	0.82802	0.11658	5.88134	1	0.01559	FALSE
1	Reaction	POST PROCEDURAL COMPLICATION	1	12158	6413	0.10203	0.01437	0.72429	0.00112	0.01559	TRUE
1	Reaction	PREGNANCY	1	16160	6413	0.07676	0.01081	0.5449	7e-05	0.01559	TRUE
1	Reaction	PREMATURE LABOUR	1	3878	6413	0.31993	0.04506	2.27153	0.38707	0.01559	FALSE
1	Reaction	PREMATURE MENOPAUSE	1	435	6413	2.85801	0.40173	20.3327	0.29571	0.01559	FALSE
1	Reaction	PRESBYOESOPHAGUS	1	38	6413	33.5237	4.60017	244.303	0.03016	0.01559	TRUE
1	Reaction	PRIMARY HYPOGONADISM	1	100	6413	12.529	1.74775	89.8168	0.07743	0.01559	FALSE
1	Reaction	PRODUCT LABEL CONFUSION	1	1263	6413	0.98287	0.13836	6.98203	1	0.01559	FALSE
1	Reaction	PROGRESSIVE MULTIFOCAL LEUKOENCEPHALOPATHY	1	3961	6413	0.31323	0.04412	2.22391	0.38988	0.01559	FALSE
1	Reaction	PROSTATE INFECTION	1	418	6413	2.97452	0.41807	21.1635	0.286	0.01559	FALSE
1	Reaction	PROTEIN S INCREASED	1	21	6413	62.0188	8.32434	462.058	0.01678	0.01559	TRUE
1	Reaction	PROTEIN URINE PRESENT	1	2232	6413	0.55597	0.07829	3.94816	1	0.01559	FALSE
1	Reaction	PROTHROMBIN TIME SHORTENED	1	933	6413	1.33088	0.1873	9.45681	0.52855	0.01559	FALSE
1	Reaction	PSEUDOMONAL SEPSIS	1	765	6413	1.62353	0.22843	11.539	0.46019	0.01559	FALSE
1	Reaction	PSEUDOMONAS TEST POSITIVE	1	420	6413	2.96032	0.41608	21.0623	0.28715	0.01559	FALSE
1	Reaction	PSYCHOMOTOR SKILLS IMPAIRED	1	1027	6413	1.20894	0.17015	8.58957	0.56294	0.01559	FALSE
1	Reaction	PULMONARY ARTERY THROMBOSIS	1	408	6413	3.04761	0.42831	21.6848	0.28022	0.01559	FALSE
1	Reaction	PULMONARY VALVE STENOSIS	1	614	6413	2.02345	0.28461	14.3859	0.39033	0.01559	FALSE
1	Reaction	PULSE ABSENT	1	3035	6413	0.40883	0.05758	2.90288	0.74065	0.01559	FALSE
1	Reaction	PULSELESS ELECTRICAL ACTIVITY	1	1425	6413	0.87105	0.12263	6.18718	1	0.01559	FALSE
1	Reaction	PUPIL FIXED	1	1252	6413	0.99151	0.13957	7.04347	1	0.01559	FALSE
1	Reaction	PURPURA	1	4759	6413	0.26069	0.03672	1.85084	0.19832	0.01559	FALSE
1	Reaction	PYELONEPHRITIS ACUTE	1	871	6413	1.42572	0.20063	10.1315	0.50439	0.01559	FALSE
1	Reaction	PYLOROSPASM	1	14	6413	95.4135	12.4832	729.282	0.01122	0.01559	TRUE
1	Reaction	Pancreatic failure	1	18	6413	72.9633	9.71122	548.195	0.0144	0.01559	TRUE
1	Reaction	Pancreatic toxicity	1	14	6413	95.4135	12.4832	729.282	0.01122	0.01559	TRUE
1	Reaction	Peripheral arthritis	1	116	6413	10.7859	1.50665	77.2146	0.08925	0.01559	FALSE
1	Reaction	Peritonectomy	1	4	6413	413.459	43.0119	3974.43	0.00322	0.01559	TRUE
1	Reaction	Pharyngeal cancer	1	56	6413	22.5523	3.1213	162.947	0.04413	0.01559	TRUE
1	Reaction	Pleomorphic adenoma	1	23	6413	56.3807	7.60059	418.229	0.01836	0.01559	TRUE
1	Reaction	Polyglandular autoimmune syndrome type I	1	4	6413	413.459	43.0119	3974.43	0.00322	0.01559	TRUE
1	Reaction	Primary hypoparathyroidism	1	4	6413	413.459	43.0119	3974.43	0.00322	0.01559	TRUE
1	Reaction	Procedural pneumothorax	1	23	6413	56.3807	7.60059	418.229	0.01836	0.01559	TRUE
1	Reaction	QRS AXIS ABNORMAL	1	518	6413	2.39918	0.33736	17.0622	0.34128	0.01559	FALSE
1	Reaction	RADIATION MYELOPATHY	1	16	6413	82.6917	10.9243	625.938	0.01281	0.01559	TRUE
1	Reaction	RADIATION PNEUMONITIS	1	502	6413	2.4758	0.34811	17.6082	0.33273	0.01559	FALSE
1	Reaction	RADICULOPATHY	1	1142	6413	1.0871	0.15302	7.72309	0.60163	0.01559	FALSE
1	Reaction	RADIOTHERAPY	1	729	6413	1.70381	0.23971	12.1104	0.44429	0.01559	FALSE
1	Reaction	RASH FOLLICULAR	1	77	6413	16.3207	2.2699	117.347	0.06017	0.01559	FALSE
1	Reaction	RASH VESICULAR	1	1724	6413	0.71989	0.10136	5.11288	1	0.01559	FALSE
1	Reaction	RECTAL CANCER	1	1375	6413	0.90275	0.12709	6.41249	1	0.01559	FALSE
1	Reaction	RECTAL POLYP	1	594	6413	2.0917	0.29419	14.8719	0.38042	0.01559	FALSE
1	Reaction	RECTAL TUBE INSERTION	1	6	6413	248.075	28.9856	2123.17	0.00482	0.01559	TRUE
1	Reaction	RECTAL ULCER	1	527	6413	2.35813	0.33159	16.7698	0.34604	0.01559	FALSE
1	Reaction	RECURRENT CANCER	1	1136	6413	1.09284	0.15383	7.76396	0.5997	0.01559	FALSE
1	Reaction	RED MAN SYNDROME	1	494	6413	2.51597	0.35375	17.8945	0.32842	0.01559	FALSE
1	Reaction	RENAL CELL CARCINOMA	1	2848	6413	0.43568	0.06136	3.09361	0.73449	0.01559	FALSE
1	Reaction	RENAL FAILURE CHRONIC	1	8403	6413	0.14763	0.0208	1.04803	0.01866	0.01559	TRUE
1	Reaction	RENAL FUNCTION TEST ABNORMAL	1	1589	6413	0.78109	0.10997	5.54781	1	0.01559	FALSE
1	Reaction	RENAL INFARCT	1	685	6413	1.81341	0.25511	12.8905	0.42423	0.01559	FALSE
1	Reaction	RENAL PAIN	1	4485	6413	0.27662	0.03896	1.96396	0.28178	0.01559	FALSE
1	Reaction	RENAL TUBULAR ACIDOSIS	1	781	6413	1.59023	0.22375	11.302	0.4671	0.01559	FALSE
1	Reaction	RESPIRATORY DEPRESSION	1	5368	6413	0.23111	0.03255	1.64079	0.14304	0.01559	FALSE
1	Reaction	RESPIRATORY DISORDER	1	13805	6413	0.08986	0.01266	0.63787	0.00041	0.01559	TRUE
1	Reaction	RESPIRATORY SYNCYTIAL VIRUS INFECTION	1	1594	6413	0.77864	0.10963	5.53039	1	0.01559	FALSE
1	Reaction	RESPIRATORY TRACT INFECTION VIRAL	1	590	6413	2.1059	0.29619	14.9731	0.37842	0.01559	FALSE
1	Reaction	RESTRICTIVE CARDIOMYOPATHY	1	156	6413	8.00242	1.12029	57.1629	0.11814	0.01559	FALSE
1	Reaction	RETICULOCYTOSIS	1	94	6413	13.3374	1.85932	95.6722	0.07296	0.01559	FALSE
1	Reaction	RETINAL DEPIGMENTATION	1	134	6413	9.32613	1.30424	66.6878	0.10236	0.01559	FALSE
1	Reaction	RETINAL DISORDER	1	1441	6413	0.86137	0.12127	6.11839	1	0.01559	FALSE
1	Reaction	RETINAL HAEMORRHAGE	1	3864	6413	0.32109	0.04522	2.27976	0.38666	0.01559	FALSE
1	Reaction	RETINAL OEDEMA	1	773	6413	1.6067	0.22607	11.4193	0.46365	0.01559	FALSE
1	Reaction	RETINAL PIGMENTATION	1	110	6413	11.3796	1.58884	81.503	0.08483	0.01559	FALSE
1	Reaction	RETROPERITONEAL HAEMATOMA	1	1207	6413	1.0285	0.14478	7.3065	0.62197	0.01559	FALSE
1	Reaction	RETROVIRAL INFECTION	1	22	6413	59.0655	7.94603	439.054	0.01757	0.01559	TRUE
1	Reaction	RHINITIS	1	3273	6413	0.37909	0.05339	2.69166	0.53214	0.01559	FALSE
1	Reaction	RIB FRACTURE	1	8869	6413	0.13987	0.0197	0.99295	0.01316	0.01559	TRUE
1	Reaction	Rheumatic disorder	1	535	6413	2.3228	0.32664	16.5181	0.35025	0.01559	FALSE
1	Reaction	SALMONELLOSIS	1	596	6413	2.08466	0.2932	14.8218	0.38142	0.01559	FALSE
1	Reaction	SCAB	1	4174	6413	0.29724	0.04187	2.11037	0.2756	0.01559	FALSE
1	Reaction	SCAN BONE MARROW ABNORMAL	1	19	6413	68.9098	9.20032	516.129	0.0152	0.01559	TRUE
1	Reaction	SCHIZOPHRENIA	1	4033	6413	0.30763	0.04333	2.18418	0.3928	0.01559	FALSE
1	Reaction	SCRATCH	1	3157	6413	0.39302	0.05535	2.79063	0.53	0.01559	FALSE
1	Reaction	SEBORRHOEIC KERATOSIS	1	674	6413	1.84305	0.25927	13.1015	0.41911	0.01559	FALSE
1	Reaction	SEDATION	1	10797	6413	0.11489	0.01618	0.81561	0.00326	0.01559	TRUE
1	Reaction	SENSATION OF HEAVINESS	1	4127	6413	0.30062	0.04234	2.13441	0.27541	0.01559	FALSE
1	Reaction	SENSATION OF PRESSURE	1	984	6413	1.26183	0.17759	8.96568	0.54753	0.01559	FALSE
1	Reaction	SENSORY DISTURBANCE	1	9678	6413	0.12818	0.01806	0.90993	0.00645	0.01559	TRUE
1	Reaction	SENSORY LEVEL ABNORMAL	1	78	6413	16.1088	2.24079	115.804	0.06092	0.01559	FALSE
1	Reaction	SEPTIC ENCEPHALOPATHY	1	53	6413	23.8534	3.29802	172.523	0.04181	0.01559	TRUE
1	Reaction	SEROSITIS	1	198	6413	6.29632	0.88263	44.9154	0.14749	0.01559	FALSE
1	Reaction	SHOULDER ARTHROPLASTY	1	793	6413	1.56613	0.22036	11.1305	0.47223	0.01559	FALSE
1	Reaction	SIALOADENITIS	1	527	6413	2.35813	0.33159	16.7698	0.34604	0.01559	FALSE
1	Reaction	SIMPLE PARTIAL SEIZURES	1	415	6413	2.99608	0.42109	21.3173	0.28427	0.01559	FALSE
1	Reaction	SINOBRONCHITIS	1	62	6413	20.334	2.81918	146.664	0.04874	0.01559	TRUE
1	Reaction	SINUS CONGESTION	1	6524	6413	0.19015	0.02678	1.34996	0.07448	0.01559	FALSE
1	Reaction	SINUS HEADACHE	1	3790	6413	0.32736	0.04611	2.3243	0.3848	0.01559	FALSE
1	Reaction	SINUS POLYP	1	256	6413	4.86422	0.68264	34.6602	0.18642	0.01559	FALSE
1	Reaction	SKIN DEPIGMENTATION	1	570	6413	2.17992	0.30658	15.5003	0.36832	0.01559	FALSE
1	Reaction	SKIN FISSURES	1	3691	6413	0.33615	0.04734	2.38667	0.38314	0.01559	FALSE
1	Reaction	SKIN HYPOPIGMENTATION	1	422	6413	2.94626	0.4141	20.962	0.28829	0.01559	FALSE
1	Reaction	SKIN LESION EXCISION	1	102	6413	12.281	1.71347	88.021	0.07891	0.01559	FALSE
1	Reaction	SKIN NEOPLASM EXCISION	1	347	6413	3.5849	0.50361	25.5186	0.24395	0.01559	FALSE
1	Reaction	SKIN OEDEMA	1	566	6413	2.19536	0.30875	15.6102	0.36628	0.01559	FALSE
1	Reaction	SKIN REACTION	1	5505	6413	0.22536	0.03174	1.59994	0.14546	0.01559	FALSE
1	Reaction	SMALL INTESTINAL PERFORATION	1	832	6413	1.49263	0.21003	10.6075	0.48856	0.01559	FALSE
1	Reaction	SOLAR DERMATITIS	1	94	6413	13.3374	1.85932	95.6722	0.07296	0.01559	FALSE
1	Reaction	SPINAL DISORDER	1	4572	6413	0.27136	0.03822	1.92657	0.28496	0.01559	FALSE
1	Reaction	SPINAL OSTEOARTHRITIS	1	5003	6413	0.24798	0.03493	1.76054	0.20293	0.01559	FALSE
1	Reaction	SPINAL PAIN	1	3571	6413	0.34744	0.04893	2.46692	0.54329	0.01559	FALSE
1	Reaction	SPLENIC INFARCTION	1	870	6413	1.42736	0.20086	10.1432	0.50399	0.01559	FALSE
1	Reaction	STAPHYLOCOCCAL BACTERAEMIA	1	1795	6413	0.6914	0.09735	4.91042	1	0.01559	FALSE
1	Reaction	STENT PLACEMENT	1	4626	6413	0.26819	0.03777	1.90408	0.28722	0.01559	FALSE
1	Reaction	STERNAL FRACTURE	1	506	6413	2.45619	0.34536	17.4685	0.33488	0.01559	FALSE
1	Reaction	STIFF PERSON SYNDROME	1	93	6413	13.4823	1.87932	96.7231	0.07221	0.01559	FALSE
1	Reaction	STREPTOCOCCAL INFECTION	1	2546	6413	0.48738	0.06864	3.46086	0.72935	0.01559	FALSE
1	Reaction	STREPTOCOCCUS TEST POSITIVE	1	593	6413	2.09523	0.29469	14.8971	0.37992	0.01559	FALSE
1	Reaction	STRESS	1	28184	6413	0.04401	0.0062	0.31241	0	0.01559	TRUE
1	Reaction	STRIDOR	1	1530	6413	0.81123	0.11421	5.76202	1	0.01559	FALSE
1	Reaction	STRONGYLOIDIASIS	1	449	6413	2.7687	0.3892	19.6959	0.30361	0.01559	FALSE
1	Reaction	STUPOR	1	1918	6413	0.64704	0.09111	4.59519	1	0.01559	FALSE
1	Reaction	SUBDIAPHRAGMATIC ABSCESS	1	61	6413	20.6729	2.86541	149.148	0.04797	0.01559	TRUE
1	Reaction	SUBDURAL HAEMORRHAGE	1	1354	6413	0.91676	0.12906	6.5121	1	0.01559	FALSE
1	Reaction	SUDDEN HEARING LOSS	1	944	6413	1.31535	0.18511	9.34638	0.53271	0.01559	FALSE
1	Reaction	SUDDEN VISUAL LOSS	1	111	6413	11.2761	1.57452	80.7555	0.08557	0.01559	FALSE
1	Reaction	SUICIDAL BEHAVIOUR	1	2185	6413	0.56794	0.07998	4.03317	1	0.01559	FALSE
1	Reaction	SUICIDE ATTEMPT	1	28518	6413	0.0435	0.00613	0.30876	0	0.01559	TRUE
1	Reaction	SUNBURN	1	3941	6413	0.31482	0.04434	2.2352	0.38914	0.01559	FALSE
1	Reaction	SUPERINFECTION	1	799	6413	1.55436	0.21871	11.0467	0.47478	0.01559	FALSE
1	Reaction	SUPERIOR SAGITTAL SINUS THROMBOSIS	1	568	6413	2.18761	0.30766	15.555	0.3673	0.01559	FALSE
1	Reaction	SUPERIOR VENA CAVA SYNDROME	1	256	6413	4.86422	0.68264	34.6602	0.18642	0.01559	FALSE
1	Reaction	SUPRAPUBIC PAIN	1	281	6413	4.42991	0.62191	31.5547	0.20265	0.01559	FALSE
1	Reaction	SWEAT GLAND TUMOUR	1	100	6413	12.529	1.74775	89.8168	0.07743	0.01559	FALSE
1	Reaction	SYNCOPE VASOVAGAL	1	933	6413	1.33088	0.1873	9.45681	0.52855	0.01559	FALSE
1	Reaction	Strangulated hernia	1	68	6413	18.5131	2.57039	133.339	0.05333	0.01559	FALSE
1	Reaction	Subacute cutaneous lupus erythematosus	1	389	6413	3.19684	0.44924	22.7493	0.26911	0.01559	FALSE
1	Reaction	Subretinal fluid	1	171	6413	7.29633	1.02201	52.0901	0.12873	0.01559	FALSE
1	Reaction	T-CELL LYMPHOMA	1	546	6413	2.27592	0.32006	16.1841	0.35598	0.01559	FALSE
1	Reaction	TACHYARRHYTHMIA	1	1368	6413	0.90737	0.12774	6.44535	1	0.01559	FALSE
1	Reaction	TACHYCARDIA PAROXYSMAL	1	172	6413	7.25366	1.01606	51.7837	0.12944	0.01559	FALSE
1	Reaction	TACHYPNOEA	1	5372	6413	0.23094	0.03253	1.63956	0.1431	0.01559	FALSE
1	Reaction	TEETH BRITTLE	1	395	6413	3.14816	0.44241	22.402	0.27264	0.01559	FALSE
1	Reaction	TEMPERATURE INTOLERANCE	1	3664	6413	0.33862	0.04769	2.40427	0.38286	0.01559	FALSE
1	Reaction	TENDERNESS	1	5026	6413	0.24684	0.03477	1.75248	0.20358	0.01559	FALSE
1	Reaction	TENDON RUPTURE	1	6723	6413	0.18452	0.02599	1.30999	0.05127	0.01559	FALSE
1	Reaction	TERMINAL STATE	1	3015	6413	0.41154	0.05796	2.92215	0.7399	0.01559	FALSE
1	Reaction	TESTICULAR PAIN	1	1543	6413	0.80439	0.11325	5.71341	1	0.01559	FALSE
1	Reaction	THERAPEUTIC EMBOLISATION	1	195	6413	6.39369	0.89621	45.6135	0.14542	0.01559	FALSE
1	Reaction	THERAPEUTIC PROCEDURE	1	585	6413	2.12393	0.29872	15.1015	0.37591	0.01559	FALSE
1	Reaction	THERAPY RESPONDER	1	391	6413	3.18045	0.44694	22.6324	0.27029	0.01559	FALSE
1	Reaction	THORACIC CAVITY DRAINAGE	1	162	6413	7.7042	1.07879	55.0196	0.12239	0.01559	FALSE
1	Reaction	THORACIC VERTEBRAL FRACTURE	1	1203	6413	1.03193	0.14526	7.33084	0.62075	0.01559	FALSE
1	Reaction	THORACOSTOMY	1	64	6413	19.6885	2.73107	141.936	0.05027	0.01559	FALSE
1	Reaction	THROMBOCYTOPENIC PURPURA	1	853	6413	1.45584	0.20486	10.3458	0.49715	0.01559	FALSE
1	Reaction	THROMBOCYTOSIS	1	1325	6413	0.93684	0.13188	6.65484	1	0.01559	FALSE
1	Reaction	THROMBOPHLEBITIS	1	2114	6413	0.58702	0.08266	4.16875	1	0.01559	FALSE
1	Reaction	THROMBOPHLEBITIS SUPERFICIAL	1	2442	6413	0.50814	0.07156	3.60837	1	0.01559	FALSE
1	Reaction	THROMBOSIS IN DEVICE	1	2699	6413	0.45974	0.06474	3.26452	0.73112	0.01559	FALSE
1	Reaction	THYROID NEOPLASM	1	2384	6413	0.52051	0.0733	3.69623	1	0.01559	FALSE
1	Reaction	THYROIDECTOMY	1	727	6413	1.70851	0.24037	12.1438	0.4434	0.01559	FALSE
1	Reaction	THYROIDITIS CHRONIC	1	39	6413	32.6415	4.48219	237.711	0.03094	0.01559	TRUE
1	Reaction	THYROXINE INCREASED	1	266	6413	4.68066	0.65698	33.3475	0.19295	0.01559	FALSE
1	Reaction	TOLOSA-HUNT SYNDROME	1	23	6413	56.3807	7.60059	418.229	0.01836	0.01559	TRUE
1	Reaction	TONSILLITIS	1	2059	6413	0.60271	0.08487	4.28021	1	0.01559	FALSE
1	Reaction	TOOTH ABSCESS	1	5097	6413	0.2434	0.03428	1.72806	0.20582	0.01559	FALSE
1	Reaction	TOOTHACHE	1	8292	6413	0.14961	0.02107	1.06206	0.0184	0.01559	TRUE
1	Reaction	TORSADE DE POINTES	1	3935	6413	0.3153	0.04441	2.23861	0.38893	0.01559	FALSE
1	Reaction	TOXIC NODULAR GOITRE	1	80	6413	15.701	2.18476	112.836	0.06244	0.01559	FALSE
1	Reaction	TOXOCARIASIS	1	20	6413	65.2829	8.74045	487.602	0.01599	0.01559	TRUE
1	Reaction	TOXOPLASMOSIS	1	429	6413	2.89807	0.40735	20.6184	0.2923	0.01559	FALSE
1	Reaction	TRACHEOBRONCHITIS	1	384	6413	3.23858	0.45509	23.0471	0.26616	0.01559	FALSE
1	Reaction	TRANSFUSION-ASSOCIATED DYSPNOEA	1	10	6413	137.82	17.4627	1087.7	0.00803	0.01559	TRUE
1	Reaction	TRANSIENT ACANTHOLYTIC DERMATOSIS	1	101	6413	12.4038	1.73044	88.9098	0.07817	0.01559	FALSE
1	Reaction	TRANSPLANT REJECTION	1	2959	6413	0.41933	0.05906	2.97749	0.73791	0.01559	FALSE
1	Reaction	TRAUMATIC LUNG INJURY	1	802	6413	1.54853	0.21789	11.0053	0.47605	0.01559	FALSE
1	Reaction	TRI-IODOTHYRONINE DECREASED	1	225	6413	5.53739	0.77671	39.4779	0.16584	0.01559	FALSE
1	Reaction	TUMOUR EXCISION	1	382	6413	3.25558	0.45747	23.1684	0.26498	0.01559	FALSE
1	Reaction	TUMOUR FLARE	1	319	6413	3.90055	0.54782	27.7725	0.22669	0.01559	FALSE
1	Reaction	TUMOUR NECROSIS	1	506	6413	2.45619	0.34536	17.4685	0.33488	0.01559	FALSE
1	Reaction	TUMOUR ULCERATION	1	69	6413	18.2408	2.53313	131.35	0.05409	0.01559	FALSE
1	Reaction	TYPE III IMMUNE COMPLEX MEDIATED REACTION	1	237	6413	5.25583	0.73738	37.4622	0.17386	0.01559	FALSE
1	Reaction	TYPE IV HYPERSENSITIVITY REACTION	1	850	6413	1.46098	0.20559	10.3824	0.49593	0.01559	FALSE
1	Reaction	TYPHOID FEVER	1	122	6413	10.251	1.43254	73.3549	0.09364	0.01559	FALSE
1	Reaction	ULCER HAEMORRHAGE	1	3650	6413	0.33992	0.04788	2.4135	0.38275	0.01559	FALSE
1	Reaction	ULCERATIVE KERATITIS	1	1180	6413	1.05206	0.14809	7.47397	0.61365	0.01559	FALSE
1	Reaction	UNDERDOSE	1	23548	6413	0.05268	0.00742	0.37393	0	0.01559	TRUE
1	Reaction	UNEVALUABLE EVENT	1	37713	6413	0.03289	0.00463	0.23347	0	0.01559	TRUE
1	Reaction	URETHRITIS	1	246	6413	5.06276	0.7104	36.0806	0.17984	0.01559	FALSE
1	Reaction	URINARY INCONTINENCE	1	14604	6413	0.08494	0.01197	0.60296	0.00019	0.01559	TRUE
1	Reaction	URINARY SEDIMENT PRESENT	1	238	6413	5.23365	0.73428	37.3035	0.17453	0.01559	FALSE
1	Reaction	URINARY TRACT DISORDER	1	1904	6413	0.6518	0.09178	4.62902	1	0.01559	FALSE
1	Reaction	URINARY TRACT PAIN	1	199	6413	6.26452	0.87819	44.6875	0.14817	0.01559	FALSE
1	Reaction	UROGENITAL DISORDER	1	104	6413	12.0425	1.68052	86.2957	0.0804	0.01559	FALSE
1	Reaction	Urticarial vasculitis	1	38	6413	33.5237	4.60017	244.303	0.03016	0.01559	TRUE
1	Reaction	VARICELLA	1	1194	6413	1.03971	0.14635	7.38619	0.61799	0.01559	FALSE
1	Reaction	VARICOCELE	1	157	6413	7.95113	1.11315	56.7941	0.11885	0.01559	FALSE
1	Reaction	VENA CAVA FILTER INSERTION	1	268	6413	4.6456	0.65208	33.0968	0.19425	0.01559	FALSE
1	Reaction	VENA CAVA THROMBOSIS	1	966	6413	1.28536	0.1809	9.13309	0.54092	0.01559	FALSE
1	Reaction	VENOOCCLUSIVE LIVER DISEASE	1	1699	6413	0.73049	0.10285	5.1882	1	0.01559	FALSE
1	Reaction	VENOUS PRESSURE JUGULAR INCREASED	1	238	6413	5.23365	0.73428	37.3035	0.17453	0.01559	FALSE
1	Reaction	VENOUS THROMBOSIS LIMB	1	1190	6413	1.04321	0.14685	7.41106	0.61675	0.01559	FALSE
1	Reaction	VENTRICULAR EXTRASYSTOLES	1	6235	6413	0.19897	0.02803	1.41256	0.07211	0.01559	FALSE
1	Reaction	VENTRICULAR HYPOKINESIA	1	1880	6413	0.66013	0.09295	4.68817	1	0.01559	FALSE
1	Reaction	VESTIBULAR DISORDER	1	633	6413	1.96262	0.27607	13.9528	0.39959	0.01559	FALSE
1	Reaction	VIRAL LABYRINTHITIS	1	36	6413	35.4393	4.85578	258.649	0.0286	0.01559	TRUE
1	Reaction	VIRAL LOAD	1	93	6413	13.4823	1.87932	96.7231	0.07221	0.01559	FALSE
1	Reaction	VITAMIN B12 DEFICIENCY	1	1634	6413	0.75957	0.10694	5.39484	1	0.01559	FALSE
1	Reaction	VITAMIN D DECREASED	1	3836	6413	0.32344	0.04555	2.29641	0.3859	0.01559	FALSE
1	Reaction	VITREOUS DETACHMENT	1	981	6413	1.26569	0.17813	8.99316	0.54644	0.01559	FALSE
1	Reaction	VOCAL CORD PARALYSIS	1	844	6413	1.47138	0.20705	10.4564	0.49348	0.01559	FALSE
1	Reaction	VULVOVAGINAL CANDIDIASIS	1	489	6413	2.54175	0.35736	18.0782	0.32571	0.01559	FALSE
1	Reaction	WOUND COMPLICATION	1	1517	6413	0.81819	0.11519	5.81146	1	0.01559	FALSE
1	Reaction	WRIST FRACTURE	1	5555	6413	0.22333	0.03146	1.58553	0.14661	0.01559	FALSE
1	Reaction	WRIST SURGERY	1	344	6413	3.61626	0.50801	25.7425	0.24212	0.01559	FALSE
1	Reaction	WRONG DRUG ADMINISTERED	1	8134	6413	0.15251	0.02148	1.08269	0.01825	0.01559	TRUE
1	Reaction	XEROSIS	1	451	6413	2.75639	0.38748	19.6082	0.30474	0.01559	FALSE
1	Reaction	YELLOW SKIN	1	2330	6413	0.53258	0.075	3.78196	1	0.01559	FALSE

## Sheet: Cohort 2
COHORT	CONCEPT	NAME	CONCEPT_AES_IN_COHORT	CONCEPT_CASE_COUNT	COHORT_SIZE	PRR	PRR_95CI(-)	PRR_95CI(+)	P-value Fisher Exact Test (two tailed)	COHORT_%COVERAGE	Significant_FisherExactTest
2	Reaction	MALIGNANT NEOPLASM PROGRESSION	422	30093	2943	38.4586	35.1825	42.0398	0	14.3391	TRUE
2	Reaction	DEATH	280	340884	2943	2.22291	1.98843	2.48504	0	9.5141	TRUE
2	Reaction	DIARRHOEA	241	235661	2943	2.76814	2.45256	3.12431	0	8.18892	TRUE
2	Reaction	PYREXIA	199	155533	2943	3.46418	3.02897	3.96191	0	6.76181	TRUE
2	Reaction	COLITIS	195	12513	2943	42.8063	37.3344	49.0803	0	6.62589	TRUE
2	Reaction	HYPOTHYROIDISM	106	12738	2943	22.6907	18.807	27.3763	0	3.60177	TRUE
2	Reaction	NAUSEA	103	342597	2943	0.8132	0.67266	0.98311	0.03258	3.49983	TRUE
2	Reaction	FATIGUE	101	290118	2943	0.9417	0.77743	1.14067	0.5882	3.43187	FALSE
2	Reaction	RASH	101	157441	2943	1.73578	1.43296	2.1026	0	3.43187	TRUE
2	Reaction	ALANINE AMINOTRANSFERASE INCREASED	96	34856	2943	7.46801	6.13247	9.09441	0	3.26198	TRUE
2	Reaction	ASPARTATE AMINOTRANSFERASE INCREASED	83	31426	2943	7.16063	5.79055	8.85487	0	2.82025	TRUE
2	Reaction	DYSPNOEA	81	243040	2943	0.9015	0.72725	1.11751	0.36255	2.75229	FALSE
2	Reaction	VOMITING	80	208039	2943	1.04022	0.83799	1.29125	0.68597	2.71831	FALSE
2	Reaction	PNEUMONITIS	77	8805	2943	23.8556	19.1174	29.768	0	2.61638	TRUE
2	Reaction	Acute kidney injury	69	24144	2943	7.74991	6.13596	9.78837	0	2.34455	TRUE
2	Reaction	HEADACHE	69	267648	2943	0.69729	0.55224	0.88042	0.0015	2.34455	TRUE
2	Reaction	HYPOPHYSITIS	69	475	2943	459.554	356.954	591.644	0	2.34455	TRUE
2	Reaction	DEHYDRATION	67	67030	2943	2.70554	2.13501	3.42853	0	2.27659	TRUE
2	Reaction	OFF LABEL USE	66	149692	2943	1.19275	0.93958	1.51415	0.15342	2.24261	FALSE
2	Reaction	PRURITUS	66	125446	2943	1.42341	1.12126	1.80698	0.00596	2.24261	TRUE
2	Reaction	DECREASED APPETITE	64	87299	2943	1.98382	1.55677	2.52802	0	2.17465	TRUE
2	Reaction	PNEUMONIA	63	128928	2943	1.32196	1.03539	1.68785	0.02831	2.14067	TRUE
2	Reaction	HEPATIC FUNCTION ABNORMAL	61	15901	2943	10.4133	8.11942	13.3552	0	2.07271	TRUE
2	Reaction	ADRENAL INSUFFICIENCY	60	2959	2943	55.965	43.4519	72.0817	0	2.03874	TRUE
2	Reaction	HYPERTHYROIDISM	60	5350	2943	30.6697	23.8405	39.455	0	2.03874	TRUE
2	Reaction	GENERAL PHYSICAL HEALTH DETERIORATION	55	41638	2943	3.57652	2.75222	4.64769	0	1.86884	TRUE
2	Reaction	AUTOIMMUNE HEPATITIS	54	2645	2943	56.356	43.1479	73.6071	0	1.83486	TRUE
2	Reaction	ABDOMINAL PAIN	53	104338	2943	1.37426	1.05238	1.79458	0.02301	1.80088	TRUE
2	Reaction	ANAEMIA	51	91531	2943	1.5075	1.14833	1.97901	0.00539	1.73293	TRUE
2	Reaction	ARTHRALGIA	50	154147	2943	0.87738	0.66653	1.15495	0.38434	1.69895	FALSE
2	Reaction	MALAISE	50	194484	2943	0.69536	0.52825	0.91533	0.00714	1.69895	TRUE
2	Reaction	HEPATITIS	48	11781	2943	11.0623	8.35096	14.654	0	1.63099	TRUE
2	Reaction	SEPSIS	48	50407	2943	2.57738	1.94654	3.41266	0	1.63099	TRUE
2	Reaction	INTERSTITIAL LUNG DISEASE	47	18587	2943	6.85491	5.16032	9.10599	0	1.59701	TRUE
2	Reaction	HYPONATRAEMIA	45	25655	2943	4.75134	3.55457	6.35107	0	1.52905	TRUE
2	Reaction	GAMMA-GLUTAMYLTRANSFERASE INCREASED	41	13518	2943	8.22629	6.06726	11.1536	0	1.39314	TRUE
2	Reaction	BLOOD ALKALINE PHOSPHATASE INCREASED	40	16186	2943	6.69898	4.92232	9.11691	0	1.35916	TRUE
2	Reaction	LIVER DISORDER	40	20495	2943	5.28779	3.88571	7.19578	0	1.35916	TRUE
2	Reaction	HYPOTENSION	39	87147	2943	1.21065	0.88632	1.65367	0.21506	1.32518	FALSE
2	Reaction	ASTHENIA	37	166251	2943	0.60193	0.43699	0.82912	0.00097	1.25722	TRUE
2	Reaction	RENAL FAILURE	37	59607	2943	1.67953	1.21924	2.3136	0.00356	1.25722	TRUE
2	Reaction	COUGH	36	102635	2943	0.9488	0.68572	1.31279	0.86991	1.22324	FALSE
2	Reaction	PLEURAL EFFUSION	36	30354	2943	3.21082	2.32024	4.44323	0	1.22324	TRUE
2	Reaction	METASTASES TO CENTRAL NERVOUS SYSTEM	34	4640	2943	19.9604	14.2722	27.9155	0	1.15528	TRUE
2	Reaction	DIABETIC KETOACIDOSIS	33	8928	2943	10.0319	7.14103	14.093	0	1.1213	TRUE
2	Reaction	ATRIAL FIBRILLATION	32	42363	2943	2.04411	1.44808	2.88547	0.0003	1.08733	TRUE
2	Reaction	LEUKODERMA	32	70	2943	2277.09	1424.8	3639.21	0	1.08733	TRUE
2	Reaction	MUSCULAR WEAKNESS	31	53551	2943	1.56624	1.10342	2.2232	0.01709	1.05335	TRUE
2	Reaction	THROMBOCYTOPENIA	31	47092	2943	1.78121	1.25484	2.52837	0.00248	1.05335	TRUE
2	Reaction	CHILLS	30	53552	2943	1.51566	1.06156	2.16402	0.03085	1.01937	TRUE
2	Reaction	MYOCARDITIS	30	2713	2943	30.2353	21.1362	43.2515	0	1.01937	TRUE
2	Reaction	CONFUSIONAL STATE	29	76769	2943	1.02186	0.71133	1.46793	0.85035	0.98539	FALSE
2	Reaction	INAPPROPRIATE SCHEDULE OF DRUG ADMINISTRATION	29	53385	2943	1.4697	1.02306	2.11134	0.04153	0.98539	TRUE
2	Reaction	MYALGIA	29	78186	2943	1.00333	0.69844	1.44132	0.92554	0.98539	FALSE
2	Reaction	Autoimmune colitis	28	98	2943	1081.62	698.85	1674.03	0	0.95141	TRUE
2	Reaction	BACK PAIN	28	102670	2943	0.73764	0.51018	1.06651	0.11956	0.95141	FALSE
2	Reaction	HYPOPITUITARISM	28	461	2943	174.857	119.521	255.814	0	0.95141	TRUE
2	Reaction	TYPE 1 DIABETES MELLITUS	28	2436	2943	31.4424	21.701	45.5564	0	0.95141	TRUE
2	Reaction	ENTEROCOLITIS	27	1855	2943	39.9394	27.3607	58.3009	0	0.91743	TRUE
2	Reaction	TRANSFUSION	27	4687	2943	15.6672	10.7511	22.8313	0	0.91743	TRUE
2	Reaction	WEIGHT DECREASED	27	115015	2943	0.63493	0.43616	0.92429	0.01331	0.91743	TRUE
2	Reaction	HYPOKALAEMIA	26	19848	2943	3.54682	2.41842	5.20173	0	0.88345	TRUE
2	Reaction	MYOSITIS	25	3748	2943	18.1577	12.2735	26.8629	0	0.84947	TRUE
2	Reaction	PAIN	25	231205	2943	0.29242	0.19791	0.43205	0	0.84947	TRUE
2	Reaction	HEPATIC ENZYME INCREASED	24	25839	2943	2.51393	1.68744	3.74522	6e-05	0.81549	TRUE
2	Reaction	HYPERGLYCAEMIA	24	17896	2943	3.63121	2.4372	5.41019	0	0.81549	TRUE
2	Reaction	INFUSION RELATED REACTION	24	20309	2943	3.19926	2.14735	4.76647	0	0.81549	TRUE
2	Reaction	CONSTIPATION	23	80726	2943	0.77064	0.5129	1.15791	0.23142	0.78152	FALSE
2	Reaction	HEPATOTOXICITY	23	7483	2943	8.33686	5.54539	12.5335	0	0.78152	TRUE
2	Reaction	PULMONARY EMBOLISM	23	54859	2943	1.13416	0.75482	1.70415	0.50328	0.78152	FALSE
2	Reaction	TRANSAMINASES INCREASED	23	9299	2943	6.70472	4.4603	10.0785	0	0.78152	TRUE
2	Reaction	UVEITIS	23	3374	2943	18.5595	12.3356	27.9237	0	0.78152	TRUE
2	Reaction	ARTHRITIS	22	31815	2943	1.87113	1.23379	2.83771	0.00748	0.74754	TRUE
2	Reaction	LUNG DISORDER	22	19962	2943	2.9834	1.96703	4.52493	1e-05	0.74754	TRUE
2	Reaction	RHABDOMYOLYSIS	22	20861	2943	2.85469	1.88219	4.32968	2e-05	0.74754	TRUE
2	Reaction	C-REACTIVE PROTEIN INCREASED	21	13447	2943	4.22947	2.76092	6.47916	0	0.71356	TRUE
2	Reaction	NEUROPATHY PERIPHERAL	21	32447	2943	1.75122	1.14339	2.68217	0.01891	0.71356	TRUE
2	Reaction	BLOOD THYROID STIMULATING HORMONE INCREASED	20	3189	2943	17.0656	11.0111	26.4492	0	0.67958	TRUE
2	Reaction	HEPATOCELLULAR INJURY	20	4607	2943	11.79	7.61043	18.265	0	0.67958	TRUE
2	Reaction	PANCYTOPENIA	20	24659	2943	2.19493	1.41792	3.39772	0.00131	0.67958	TRUE
2	Reaction	THYROIDITIS	20	829	2943	66.849	42.9595	104.023	0	0.67958	TRUE
2	Reaction	ADVERSE EVENT	19	44953	2943	1.14338	0.7303	1.79013	0.53676	0.6456	FALSE
2	Reaction	DIABETES MELLITUS	19	40952	2943	1.25514	0.80167	1.96512	0.30111	0.6456	FALSE
2	Reaction	DYSPHAGIA	19	41787	2943	1.23005	0.78565	1.92584	0.36905	0.6456	FALSE
2	Reaction	ENTERITIS	19	2035	2943	25.4845	16.2444	39.9806	0	0.6456	TRUE
2	Reaction	LIPASE INCREASED	19	4129	2943	12.5004	7.97668	19.5897	0	0.6456	TRUE
2	Reaction	TRI-IODOTHYRONINE FREE DECREASED	19	74	2943	934.124	555.179	1571.72	0	0.6456	TRUE
2	Reaction	TUBULOINTERSTITIAL NEPHRITIS	19	4827	2943	10.6857	6.8197	16.7433	0	0.6456	TRUE
2	Reaction	DRUG INEFFECTIVE	18	453261	2943	0.10739	0.06775	0.17021	0	0.61162	TRUE
2	Reaction	NEUTROPENIA	18	43670	2943	1.11502	0.70343	1.76743	0.61614	0.61162	FALSE
2	Reaction	PLATELET COUNT DECREASED	18	44607	2943	1.09159	0.68865	1.73029	0.70962	0.61162	FALSE
2	Reaction	BLOOD CREATININE INCREASED	17	33009	2943	1.39333	0.86726	2.23852	0.19272	0.57764	FALSE
2	Reaction	CHOLESTASIS	17	7435	2943	6.19692	3.85554	9.96015	0	0.57764	TRUE
2	Reaction	GASTROINTESTINAL DISORDER	17	27023	2943	1.70217	1.05946	2.73477	0.03689	0.57764	TRUE
2	Reaction	HYPERTENSION	17	94216	2943	0.488	0.30377	0.78395	0.00114	0.57764	TRUE
2	Reaction	HYPOXIA	17	14660	2943	3.1393	1.95371	5.04436	5e-05	0.57764	TRUE
2	Reaction	OEDEMA PERIPHERAL	17	76483	2943	0.60117	0.37421	0.96576	0.02944	0.57764	TRUE
2	Reaction	RESPIRATORY FAILURE	17	35651	2943	1.29002	0.80296	2.07253	0.26845	0.57764	FALSE
2	Reaction	SEPTIC SHOCK	17	17275	2943	2.66362	1.65774	4.27984	0.00035	0.57764	TRUE
2	Reaction	ASCITES	16	14005	2943	3.09277	1.89671	5.04306	0.0001	0.54366	TRUE
2	Reaction	CEREBRAL HAEMORRHAGE	16	17593	2943	2.46144	1.50962	4.01338	0.00115	0.54366	TRUE
2	Reaction	DIZZINESS	16	225173	2943	0.19215	0.11787	0.31324	0	0.54366	TRUE
2	Reaction	DYSGEUSIA	16	38684	2943	1.11888	0.6863	1.82411	0.5953	0.54366	FALSE
2	Reaction	ENCEPHALITIS	16	2751	2943	15.8189	9.6901	25.824	0	0.54366	TRUE
2	Reaction	PAIN IN EXTREMITY	16	137541	2943	0.3146	0.19298	0.51285	0	0.54366	TRUE
2	Reaction	PANCREATITIS	16	29276	2943	1.47863	0.90693	2.4107	0.12443	0.54366	FALSE
2	Reaction	RASH MACULO-PAPULAR	16	8773	2943	4.94058	3.02941	8.05746	0	0.54366	TRUE
2	Reaction	RENAL IMPAIRMENT	16	30153	2943	1.4356	0.88055	2.34053	0.17257	0.54366	FALSE
2	Reaction	SYNCOPE	16	47597	2943	0.90929	0.55775	1.48238	0.81094	0.54366	FALSE
2	Reaction	URINARY TRACT INFECTION	16	66114	2943	0.65455	0.40151	1.06708	0.10251	0.54366	FALSE
2	Reaction	CARDIAC FAILURE	15	35489	2943	1.14339	0.69012	1.89436	0.57784	0.50968	FALSE
2	Reaction	FALL	15	144247	2943	0.28122	0.16975	0.46588	0	0.50968	TRUE
2	Reaction	PEMPHIGOID	15	1923	2943	21.2582	12.8068	35.2869	0	0.50968	TRUE
2	Reaction	BLOOD CREATINE PHOSPHOKINASE INCREASED	14	18243	2943	2.07672	1.23122	3.50285	0.01063	0.47571	TRUE
2	Reaction	BLOOD THYROID STIMULATING HORMONE DECREASED	14	1615	2943	23.6456	13.9894	39.9669	0	0.47571	TRUE
2	Reaction	MALIGNANT MELANOMA	14	5405	2943	7.02219	4.16122	11.8501	0	0.47571	TRUE
2	Reaction	Prescribed underdose	14	3555	2943	10.6909	6.33301	18.0477	0	0.47571	TRUE
2	Reaction	SKIN DISORDER	14	12517	2943	3.0278	1.79492	5.10752	0.00033	0.47571	TRUE
2	Reaction	Seizure	14	25843	2943	1.46566	0.86899	2.47202	0.14349	0.47571	FALSE
2	Reaction	BLOOD BILIRUBIN INCREASED	13	15988	2943	2.20047	1.27896	3.78595	0.01048	0.44173	TRUE
2	Reaction	BLOOD LACTATE DEHYDROGENASE INCREASED	13	10358	2943	3.39802	1.97476	5.84707	0.00018	0.44173	TRUE
2	Reaction	CHEST PAIN	13	97663	2943	0.35999	0.20927	0.61925	2e-05	0.44173	TRUE
2	Reaction	HEPATIC FAILURE	13	16258	2943	2.1639	1.25771	3.72302	0.0113	0.44173	TRUE
2	Reaction	INSOMNIA	13	128002	2943	0.27465	0.15966	0.47245	0	0.44173	TRUE
2	Reaction	MYOCARDIAL INFARCTION	13	125804	2943	0.27945	0.16245	0.48071	0	0.44173	TRUE
2	Reaction	WHITE BLOOD CELL COUNT DECREASED	13	42540	2943	0.82659	0.4805	1.42197	0.61169	0.44173	FALSE
2	Reaction	EOSINOPHILIA	12	6629	2943	4.90381	2.78668	8.6294	1e-05	0.40775	TRUE
2	Reaction	Fulminant type 1 diabetes mellitus	12	67	2943	589.973	316.284	1100.49	0	0.40775	TRUE
2	Reaction	HAEMOGLOBIN DECREASED	12	51476	2943	0.63051	0.35846	1.10903	0.13262	0.40775	FALSE
2	Reaction	HYPERKALAEMIA	12	15461	2943	2.10036	1.19392	3.69499	0.01758	0.40775	TRUE
2	Reaction	LIVER FUNCTION TEST ABNORMAL	12	20957	2943	1.54923	0.88068	2.72526	0.14421	0.40775	FALSE
2	Reaction	SURGERY	12	20902	2943	1.5533	0.883	2.73244	0.14357	0.40775	FALSE
2	Reaction	THYROID DISORDER	12	6468	2943	5.0261	2.85614	8.84471	1e-05	0.40775	TRUE
2	Reaction	VISION BLURRED	12	61643	2943	0.5265	0.29933	0.92607	0.02007	0.40775	TRUE
2	Reaction	ABDOMINAL PAIN UPPER	11	85903	2943	0.3463	0.19198	0.62466	4e-05	0.37377	TRUE
2	Reaction	AMYLASE INCREASED	11	1433	2943	20.9173	11.5702	37.8156	0	0.37377	TRUE
2	Reaction	BRAIN OEDEMA	11	6175	2943	4.82552	2.67389	8.70852	3e-05	0.37377	TRUE
2	Reaction	DRY MOUTH	11	36573	2943	0.81354	0.45099	1.46753	0.58576	0.37377	FALSE
2	Reaction	INFECTION	11	52911	2943	0.56228	0.31171	1.01426	0.05272	0.37377	FALSE
2	Reaction	Immune thrombocytopenic purpura	11	1345	2943	22.2972	12.3316	40.3162	0	0.37377	TRUE
2	Reaction	MYASTHENIA GRAVIS	11	1629	2943	18.3835	10.1715	33.2255	0	0.37377	TRUE
2	Reaction	NEUTROPHIL COUNT DECREASED	11	14417	2943	2.06473	1.14444	3.72505	0.02541	0.37377	TRUE
2	Reaction	PARAESTHESIA	11	76635	2943	0.38819	0.2152	0.70021	0.00042	0.37377	TRUE
2	Reaction	PNEUMONIA ASPIRATION	11	10464	2943	2.84554	1.5771	5.13419	0.00219	0.37377	TRUE
2	Reaction	PNEUMONIA BACTERIAL	11	2724	2943	10.9637	6.07106	19.7992	0	0.37377	TRUE
2	Reaction	Pneumocystis jirovecii pneumonia	11	2196	2943	13.613	7.53593	24.5908	0	0.37377	TRUE
2	Reaction	RHEUMATOID ARTHRITIS	11	35355	2943	0.84157	0.46653	1.51811	0.6774	0.37377	FALSE
2	Reaction	THERAPEUTIC RESPONSE DECREASED	11	25836	2943	1.15177	0.63847	2.07774	0.62382	0.37377	FALSE
2	Reaction	URTICARIA	11	65597	2943	0.45352	0.25142	0.81807	0.0041	0.37377	TRUE
2	Reaction	CELLULITIS	10	22835	2943	1.18468	0.638	2.1998	0.60137	0.33979	FALSE
2	Reaction	DISSEMINATED INTRAVASCULAR COAGULATION	10	8420	2943	3.21527	1.73116	5.97171	0.00143	0.33979	TRUE
2	Reaction	DRUG ERUPTION	10	7594	2943	3.56546	1.91963	6.62237	0.00067	0.33979	TRUE
2	Reaction	ERYTHEMA	10	69879	2943	0.38702	0.20844	0.71857	0.0007	0.33979	TRUE
2	Reaction	GAIT DISTURBANCE	10	86232	2943	0.31361	0.16891	0.58228	1e-05	0.33979	TRUE
2	Reaction	HYPERCALCAEMIA	10	5321	2943	5.0914	2.74071	9.45827	4e-05	0.33979	TRUE
2	Reaction	ILEUS	10	6061	2943	4.46875	2.40571	8.30099	0.00012	0.33979	TRUE
2	Reaction	INFLUENZA LIKE ILLNESS	10	44482	2943	0.60803	0.32747	1.12896	0.13548	0.33979	FALSE
2	Reaction	MENINGITIS ASEPTIC	10	1714	2943	15.8688	8.53166	29.5158	0	0.33979	TRUE
2	Reaction	METASTASES TO BONE	10	5624	2943	4.81661	2.59287	8.9475	6e-05	0.33979	TRUE
2	Reaction	METASTASES TO LUNG	10	4340	2943	6.2449	3.3612	11.6027	1e-05	0.33979	TRUE
2	Reaction	MUCOSAL INFLAMMATION	10	10848	2943	2.49497	1.34344	4.6335	0.00821	0.33979	TRUE
2	Reaction	NEPHRITIS	10	1156	2943	23.5955	12.6746	43.9262	0	0.33979	TRUE
2	Reaction	RASH GENERALISED	10	20729	2943	1.3051	0.70284	2.42343	0.36256	0.33979	FALSE
2	Reaction	SOMNOLENCE	10	88293	2943	0.30629	0.16497	0.56869	1e-05	0.33979	TRUE
2	Reaction	WHITE BLOOD CELL COUNT INCREASED	10	21523	2943	1.25693	0.67691	2.33397	0.47263	0.33979	FALSE
2	Reaction	AUTOIMMUNE PANCREATITIS	9	116	2943	227.443	115.308	448.628	0	0.30581	TRUE
2	Reaction	CHOLANGITIS	9	2273	2943	10.7493	5.59127	20.6656	0	0.30581	TRUE
2	Reaction	DERMATITIS	9	5939	2943	4.10394	2.13639	7.88355	0.00046	0.30581	TRUE
2	Reaction	GASTROENTERITIS	9	7037	2943	3.46278	1.80276	6.65137	0.00148	0.30581	TRUE
2	Reaction	GASTROINTESTINAL HAEMORRHAGE	9	50253	2943	0.48436	0.25226	0.93004	0.02577	0.30581	TRUE
2	Reaction	HAEMOLYTIC ANAEMIA	9	4711	2943	5.17575	2.694	9.94375	8e-05	0.30581	TRUE
2	Reaction	HAEMORRHAGE INTRACRANIAL	9	7945	2943	3.06658	1.59657	5.89007	0.00329	0.30581	TRUE
2	Reaction	HYPERSENSITIVITY	9	70580	2943	0.34485	0.1796	0.66214	0.00024	0.30581	TRUE
2	Reaction	HYPOAESTHESIA	9	70682	2943	0.34435	0.17934	0.66119	0.00024	0.30581	TRUE
2	Reaction	INFLAMMATION	9	17032	2943	1.42962	0.74446	2.74536	0.31092	0.30581	FALSE
2	Reaction	LYMPHOCYTIC HYPOPHYSITIS	9	60	2943	477.184	235.141	968.375	0	0.30581	TRUE
2	Reaction	MYELODYSPLASTIC SYNDROME	9	7533	2943	3.2345	1.68396	6.21272	0.00233	0.30581	TRUE
2	Reaction	Multiple organ dysfunction syndrome	9	3383	2943	7.21292	3.75342	13.861	1e-05	0.30581	TRUE
2	Reaction	PACKED RED BLOOD CELL TRANSFUSION	9	777	2943	31.688	16.4411	61.0745	0	0.30581	TRUE
2	Reaction	STOMATITIS	9	22411	2943	1.08635	0.56573	2.08608	0.72663	0.30581	FALSE
2	Reaction	AGRANULOCYTOSIS	8	6811	2943	3.17982	1.59105	6.35509	0.0044	0.27183	TRUE
2	Reaction	BLOOD GLUCOSE INCREASED	8	96809	2943	0.22347	0.11186	0.44645	0	0.27183	TRUE
2	Reaction	BLOOD PRESSURE INCREASED	8	64593	2943	0.33494	0.16765	0.66916	0.00029	0.27183	TRUE
2	Reaction	CEREBRAL INFARCTION	8	12695	2943	1.70508	0.85331	3.40707	0.15511	0.27183	FALSE
2	Reaction	CEREBROVASCULAR ACCIDENT	8	99880	2943	0.2166	0.10842	0.43273	0	0.27183	TRUE
2	Reaction	CHOLECYSTITIS	8	6558	2943	3.30265	1.65248	6.60066	0.00352	0.27183	TRUE
2	Reaction	CONJUNCTIVITIS	8	5190	2943	4.17452	2.08849	8.34411	0.00084	0.27183	TRUE
2	Reaction	DRUG-INDUCED LIVER INJURY	8	6447	2943	3.35958	1.68096	6.7145	0.00318	0.27183	TRUE
2	Reaction	ENCEPHALOPATHY	8	10511	2943	2.05963	1.0307	4.11572	0.06494	0.27183	FALSE
2	Reaction	GUILLAIN-BARRE SYNDROME	8	1970	2943	11.0257	5.51124	22.0577	0	0.27183	TRUE
2	Reaction	HISTIOCYTOSIS HAEMATOPHAGIC	8	2528	2943	8.58426	4.29224	17.1681	1e-05	0.27183	TRUE
2	Reaction	HYPOGLYCAEMIA	8	25092	2943	0.8624	0.43164	1.72304	0.86857	0.27183	FALSE
2	Reaction	INTESTINAL PERFORATION	8	5252	2943	4.12516	2.06381	8.2454	0.0009	0.27183	TRUE
2	Reaction	Liver function test increased	8	2374	2943	9.143	4.57129	18.2869	0	0.27183	TRUE
2	Reaction	Product use issue	8	62976	2943	0.34355	0.17196	0.68635	0.00052	0.27183	TRUE
2	Reaction	RASH PRURITIC	8	22582	2943	0.95829	0.47962	1.91465	1	0.27183	FALSE
2	Reaction	SINUSITIS	8	42459	2943	0.50958	0.25506	1.01809	0.05578	0.27183	FALSE
2	Reaction	SJOGREN'S SYNDROME	8	1851	2943	11.7376	5.86656	23.484	0	0.27183	TRUE
2	Reaction	STEVENS-JOHNSON SYNDROME	8	13313	2943	1.62588	0.81369	3.24878	0.1681	0.27183	FALSE
2	Reaction	TACHYCARDIA	8	39218	2943	0.5517	0.27614	1.10225	0.11121	0.27183	FALSE
2	Reaction	THYROID FUNCTION TEST ABNORMAL	8	2257	2943	9.61865	4.80881	19.2394	0	0.27183	TRUE
2	Reaction	TOXIC SKIN ERUPTION	8	4499	2943	4.81682	2.40963	9.62875	0.00033	0.27183	TRUE
2	Reaction	TUMOUR LYSIS SYNDROME	8	2853	2943	7.60364	3.80239	15.205	1e-05	0.27183	TRUE
2	Reaction	UNDERDOSE	8	23548	2943	0.91896	0.45994	1.83607	1	0.27183	FALSE
2	Reaction	VITILIGO	8	568	2943	38.6292	19.2411	77.5536	0	0.27183	TRUE
2	Reaction	BLOOD THYROID STIMULATING HORMONE ABNORMAL	7	651	2943	29.3918	13.968	61.847	0	0.23785	TRUE
2	Reaction	DEEP VEIN THROMBOSIS	7	41412	2943	0.45715	0.21811	0.95815	0.02858	0.23785	TRUE
2	Reaction	GASTRITIS	7	13538	2943	1.39888	0.66735	2.93232	0.36235	0.23785	FALSE
2	Reaction	HAEMOPTYSIS	7	13119	2943	1.44359	0.68867	3.02605	0.35366	0.23785	FALSE
2	Reaction	HEMIPARESIS	7	9292	2943	2.03859	0.97244	4.27364	0.09239	0.23785	FALSE
2	Reaction	HERPES ZOSTER	7	22793	2943	0.8307	0.39632	1.74116	0.86173	0.23785	FALSE
2	Reaction	HYPOALBUMINAEMIA	7	3484	2943	5.44386	2.59559	11.4177	0.00038	0.23785	TRUE
2	Reaction	INFLUENZA	7	36645	2943	0.51663	0.24649	1.08282	0.0759	0.23785	FALSE
2	Reaction	INTESTINAL OBSTRUCTION	7	14310	2943	1.32338	0.63133	2.77402	0.38323	0.23785	FALSE
2	Reaction	LUNG INFECTION	7	11176	2943	1.69472	0.80844	3.55259	0.14064	0.23785	FALSE
2	Reaction	LYMPHOCYTE COUNT DECREASED	7	6071	2943	3.12142	1.48874	6.54463	0.00822	0.23785	TRUE
2	Reaction	MENINGORADICULITIS	7	42	2943	540.809	240.412	1216.55	0	0.23785	TRUE
2	Reaction	MENTAL STATUS CHANGES	7	15561	2943	1.21694	0.58056	2.55087	0.52834	0.23785	FALSE
2	Reaction	METASTASES TO LIVER	7	6957	2943	2.7235	1.29903	5.71	0.01622	0.23785	TRUE
2	Reaction	METASTATIC MALIGNANT MELANOMA	7	896	2943	21.2917	10.1297	44.753	0	0.23785	TRUE
2	Reaction	NEUTROPHIL COUNT ABNORMAL	7	1005	2943	18.9662	9.02623	39.8525	0	0.23785	TRUE
2	Reaction	ORGANISING PNEUMONIA	7	1531	2943	12.4201	5.91617	26.0743	0	0.23785	TRUE
2	Reaction	OXYGEN SATURATION DECREASED	7	18049	2943	1.04912	0.50052	2.19906	0.84474	0.23785	FALSE
2	Reaction	POLYARTHRITIS	7	1693	2943	11.2267	5.34859	23.5651	0	0.23785	TRUE
2	Reaction	SECONDARY ADRENOCORTICAL INSUFFICIENCY	7	295	2943	65.7233	31.08	138.982	0	0.23785	TRUE
2	Reaction	SMALL INTESTINAL OBSTRUCTION	7	5441	2943	3.48331	1.66126	7.30376	0.00465	0.23785	TRUE
2	Reaction	THROMBOSIS	7	38265	2943	0.49475	0.23605	1.03697	0.06024	0.23785	FALSE
2	Reaction	THYROXINE FREE INCREASED	7	219	2943	89.2844	42.0876	189.408	0	0.23785	TRUE
2	Reaction	TOXIC EPIDERMAL NECROLYSIS	7	6764	2943	2.80129	1.33612	5.87315	0.01414	0.23785	TRUE
2	Reaction	VISUAL IMPAIRMENT	7	40525	2943	0.46716	0.22289	0.97913	0.0369	0.23785	TRUE
2	Reaction	ACUTE RESPIRATORY FAILURE	6	6904	2943	2.35202	1.05715	5.23295	0.0455	0.20387	TRUE
2	Reaction	ALANINE AMINOTRANSFERASE ABNORMAL	6	699	2943	23.4116	10.49	52.2502	0	0.20387	TRUE
2	Reaction	ALOPECIA	6	60378	2943	0.26874	0.12083	0.59772	0.00011	0.20387	TRUE
2	Reaction	AUTOIMMUNE THYROIDITIS	6	1312	2943	12.4229	5.57532	27.6805	1e-05	0.20387	TRUE
2	Reaction	Autoimmune haemolytic anaemia	6	767	2943	21.3197	9.5556	47.5666	0	0.20387	TRUE
2	Reaction	BASEDOW'S DISEASE	6	1155	2943	14.1203	6.33555	31.4706	1e-05	0.20387	TRUE
2	Reaction	CARDIOMYOPATHY	6	8125	2943	1.99831	0.89822	4.44574	0.13365	0.20387	FALSE
2	Reaction	CHEST DISCOMFORT	6	42857	2943	0.37862	0.17023	0.84213	0.00787	0.20387	TRUE
2	Reaction	CYTOKINE RELEASE SYNDROME	6	465	2943	35.347	15.81	79.0263	0	0.20387	TRUE
2	Reaction	DELIRIUM	6	14437	2943	1.12426	0.50541	2.50089	0.66358	0.20387	FALSE
2	Reaction	DISEASE PROGRESSION	6	46236	2943	0.35095	0.15778	0.78058	0.00341	0.20387	TRUE
2	Reaction	FAILURE TO THRIVE	6	3215	2943	5.05586	2.27152	11.2531	0.00142	0.20387	TRUE
2	Reaction	HAEMATOCHEZIA	6	18841	2943	0.86139	0.38725	1.91606	1	0.20387	FALSE
2	Reaction	HAEMORRHAGE	6	47597	2943	0.34091	0.15327	0.75826	0.00258	0.20387	TRUE
2	Reaction	JAUNDICE	6	16246	2943	0.99903	0.44912	2.22227	1	0.20387	FALSE
2	Reaction	LOSS OF CONSCIOUSNESS	6	64076	2943	0.25323	0.11385	0.56322	3e-05	0.20387	TRUE
2	Reaction	LUNG INFILTRATION	6	6495	2943	2.50027	1.12376	5.5629	0.03564	0.20387	TRUE
2	Reaction	METASTASIS	6	3050	2943	5.32991	2.39455	11.8636	0.00109	0.20387	TRUE
2	Reaction	MUSCLE SPASMS	6	83751	2943	0.19373	0.0871	0.4309	0	0.20387	TRUE
2	Reaction	NEOPLASM PROGRESSION	6	8214	2943	1.97664	0.88848	4.39752	0.1354	0.20387	FALSE
2	Reaction	OEDEMA	6	26255	2943	0.61809	0.27788	1.37482	0.33037	0.20387	FALSE
2	Reaction	POLYMYOSITIS	6	910	2943	17.9472	8.04805	40.0223	0	0.20387	TRUE
2	Reaction	Peripheral swelling	6	38657	2943	0.41976	0.18872	0.93365	0.02322	0.20387	TRUE
2	Reaction	SKIN DISCOLOURATION	6	19255	2943	0.84286	0.37892	1.87484	0.85094	0.20387	FALSE
2	Reaction	SKIN EXFOLIATION	6	19280	2943	0.84177	0.37843	1.87241	0.85096	0.20387	FALSE
2	Reaction	SWELLING	6	33663	2943	0.48205	0.21672	1.0722	0.0645	0.20387	FALSE
2	Reaction	TREMOR	6	81152	2943	0.19994	0.08989	0.4447	0	0.20387	TRUE
2	Reaction	VISUAL ACUITY REDUCED	6	25817	2943	0.62858	0.2826	1.39815	0.32806	0.20387	FALSE
2	Reaction	VOGT-KOYANAGI-HARADA SYNDROME	6	90	2943	193.146	84.4351	441.823	0	0.20387	TRUE
2	Reaction	APHASIA	5	14657	2943	0.92276	0.3843	2.21566	1	0.16989	FALSE
2	Reaction	ARRHYTHMIA	5	24398	2943	0.55427	0.23085	1.33079	0.23937	0.16989	FALSE
2	Reaction	ASPARTATE AMINOTRANSFERASE ABNORMAL	5	569	2943	23.972	9.94643	57.7753	0	0.16989	TRUE
2	Reaction	ATRIOVENTRICULAR BLOCK	5	3776	2943	3.58531	1.49253	8.61255	0.01405	0.16989	TRUE
2	Reaction	BLISTER	5	21928	2943	0.61671	0.25685	1.48074	0.37577	0.16989	FALSE
2	Reaction	BLOOD ALKALINE PHOSPHATASE ABNORMAL	5	333	2943	41.2202	17.0555	99.6219	0	0.16989	TRUE
2	Reaction	DIPLOPIA	5	12115	2943	1.11645	0.46495	2.68084	0.8096	0.16989	FALSE
2	Reaction	DRY EYE	5	12904	2943	1.04816	0.43652	2.51683	0.81695	0.16989	FALSE
2	Reaction	Drug reaction with eosinophilia and systemic symptoms	5	6783	2943	1.99472	0.83059	4.79043	0.10971	0.16989	FALSE
2	Reaction	ECZEMA	5	8174	2943	1.65506	0.6892	3.97451	0.2369	0.16989	FALSE
2	Reaction	ELECTROLYTE IMBALANCE	5	4651	2943	2.91008	1.21157	6.98975	0.03079	0.16989	TRUE
2	Reaction	EMBOLISM	5	4622	2943	2.92836	1.21917	7.03367	0.0301	0.16989	TRUE
2	Reaction	ENDOCRINE DISORDER	5	597	2943	22.8382	9.47772	55.0326	0	0.16989	TRUE
2	Reaction	ENTEROCOLITIS HAEMORRHAGIC	5	808	2943	16.8371	6.99409	40.5326	2e-05	0.16989	TRUE
2	Reaction	EOSINOPHIL COUNT INCREASED	5	3066	2943	4.41693	1.83847	10.6117	0.00612	0.16989	TRUE
2	Reaction	EPILEPSY	5	12113	2943	1.11663	0.46503	2.68128	0.80958	0.16989	FALSE
2	Reaction	FEELING ABNORMAL	5	113480	2943	0.11915	0.04963	0.28605	0	0.16989	TRUE
2	Reaction	GASTROINTESTINAL TOXICITY	5	1350	2943	10.0522	4.18024	24.1725	0.00017	0.16989	TRUE
2	Reaction	HAEMOGLOBIN ABNORMAL	5	2303	2943	5.88347	2.44831	14.1384	0.00184	0.16989	TRUE
2	Reaction	HEPATITIS ACUTE	5	3112	2943	4.35153	1.81127	10.4544	0.0065	0.16989	TRUE
2	Reaction	HOSPITALISATION	5	41233	2943	0.32794	0.13659	0.78735	0.00439	0.16989	TRUE
2	Reaction	HOT FLUSH	5	28226	2943	0.47908	0.19954	1.15026	0.11714	0.16989	FALSE
2	Reaction	HYPERHIDROSIS	5	63369	2943	0.21337	0.08887	0.51228	1e-05	0.16989	TRUE
2	Reaction	HYPOCALCAEMIA	5	8022	2943	1.68644	0.70226	4.04989	0.23029	0.16989	FALSE
2	Reaction	HYPOTHALAMO-PITUITARY DISORDER	5	466	2943	29.328	12.1582	70.745	0	0.16989	TRUE
2	Reaction	IMMUNE SYSTEM DISORDER	5	4974	2943	2.72091	1.13285	6.53519	0.0392	0.16989	TRUE
2	Reaction	Immune-mediated adverse reaction	5	38	2943	409.704	160.056	1048.74	0	0.16989	TRUE
2	Reaction	KETOACIDOSIS	5	3445	2943	3.9303	1.63605	9.44179	0.00979	0.16989	TRUE
2	Reaction	LETHARGY	5	29306	2943	0.46143	0.19218	1.10786	0.09083	0.16989	FALSE
2	Reaction	LEUKOPENIA	5	21012	2943	0.64361	0.26805	1.54532	0.46782	0.16989	FALSE
2	Reaction	LOWER RESPIRATORY TRACT INFECTION	5	13471	2943	1.00403	0.41814	2.41084	0.82372	0.16989	FALSE
2	Reaction	LYMPHADENOPATHY	5	16159	2943	0.83696	0.34857	2.00962	1	0.16989	FALSE
2	Reaction	LYMPHOCYTE COUNT ABNORMAL	5	302	2943	45.5226	18.8227	110.096	0	0.16989	TRUE
2	Reaction	LYMPHOPENIA	5	4868	2943	2.78022	1.15753	6.67771	0.0363	0.16989	TRUE
2	Reaction	MALNUTRITION	5	5243	2943	2.58118	1.07469	6.19944	0.04716	0.16989	TRUE
2	Reaction	MATERNAL EXPOSURE DURING PREGNANCY	5	19272	2943	0.70173	0.29226	1.68489	0.57184	0.16989	FALSE
2	Reaction	MENINGITIS	5	3206	2943	4.22375	1.75812	10.1472	0.00734	0.16989	TRUE
2	Reaction	METASTASES TO LYMPH NODES	5	2625	2943	5.16039	2.14767	12.3993	0.00321	0.16989	TRUE
2	Reaction	MULTI-ORGAN FAILURE	5	18510	2943	0.73063	0.30429	1.75428	0.69875	0.16989	FALSE
2	Reaction	NERVOUS SYSTEM DISORDER	5	21102	2943	0.64086	0.26691	1.53872	0.46853	0.16989	FALSE
2	Reaction	NEUROTOXICITY	5	4500	2943	3.00783	1.25225	7.22467	0.02729	0.16989	TRUE
2	Reaction	NIGHT SWEATS	5	13184	2943	1.02589	0.42724	2.46335	0.82016	0.16989	FALSE
2	Reaction	PANCREATITIS ACUTE	5	10199	2943	1.32629	0.55232	3.18482	0.43609	0.16989	FALSE
2	Reaction	POLYMYALGIA RHEUMATICA	5	1134	2943	11.9754	4.97846	28.8061	8e-05	0.16989	TRUE
2	Reaction	PULMONARY OEDEMA	5	21845	2943	0.61906	0.25783	1.48637	0.37537	0.16989	FALSE
2	Reaction	RAYNAUD'S PHENOMENON	5	2176	2943	6.22764	2.59139	14.9663	0.00144	0.16989	TRUE
2	Reaction	RESPIRATORY DISTRESS	5	13758	2943	0.98307	0.40942	2.36052	1	0.16989	FALSE
2	Reaction	RETINAL DETACHMENT	5	4187	2943	3.23295	1.34592	7.76568	0.02086	0.16989	TRUE
2	Reaction	SARCOIDOSIS	5	2049	2943	6.61459	2.75223	15.8972	0.00111	0.16989	TRUE
2	Reaction	SPEECH DISORDER	5	25571	2943	0.52884	0.22026	1.26973	0.18903	0.16989	FALSE
2	Reaction	SUDDEN DEATH	5	7176	2943	1.8854	0.78509	4.52782	0.20036	0.16989	FALSE
2	Reaction	URINARY RETENTION	5	14654	2943	0.92294	0.38438	2.21612	1	0.16989	FALSE
2	Reaction	VENTRICULAR ARRHYTHMIA	5	1527	2943	8.88319	3.6948	21.3573	0.0003	0.16989	TRUE
2	Reaction	WHEEZING	5	19150	2943	0.7062	0.29412	1.69563	0.57147	0.16989	FALSE
2	Reaction	ABASIA	4	26321	2943	0.411	0.15434	1.09443	0.07426	0.13592	FALSE
2	Reaction	ABDOMINAL DISTENSION	4	44765	2943	0.24164	0.09075	0.64345	0.00048	0.13592	TRUE
2	Reaction	ACUTE CORONARY SYNDROME	4	4836	2943	2.23845	0.84033	5.96269	0.10666	0.13592	FALSE
2	Reaction	ACUTE RESPIRATORY DISTRESS SYNDROME	4	8205	2943	1.31888	0.4952	3.51261	0.55425	0.13592	FALSE
2	Reaction	ADRENOCORTICAL INSUFFICIENCY ACUTE	4	595	2943	18.3015	6.85059	48.8927	8e-05	0.13592	TRUE
2	Reaction	ALTERED STATE OF CONSCIOUSNESS	4	8431	2943	1.28351	0.48193	3.41838	0.56109	0.13592	FALSE
2	Reaction	ANGINA PECTORIS	4	16601	2943	0.65169	0.24472	1.73546	0.54174	0.13592	FALSE
2	Reaction	APPETITE DISORDER	4	2201	2943	4.92316	1.8473	13.1205	0.00959	0.13592	TRUE
2	Reaction	ATAXIA	4	5991	2943	1.80661	0.67827	4.812	0.29251	0.13592	FALSE
2	Reaction	BLINDNESS	4	16703	2943	0.64771	0.24323	1.72486	0.54227	0.13592	FALSE
2	Reaction	BLOOD CALCIUM INCREASED	4	4699	2943	2.30376	0.86484	6.13675	0.09873	0.13592	FALSE
2	Reaction	BODY TEMPERATURE INCREASED	4	10156	2943	1.06542	0.40005	2.83743	0.79338	0.13592	FALSE
2	Reaction	BONE MARROW FAILURE	4	10233	2943	1.0574	0.39704	2.81607	0.79457	0.13592	FALSE
2	Reaction	CANCER PAIN	4	687	2943	15.8363	5.93046	42.288	0.00014	0.13592	TRUE
2	Reaction	CARDIAC ARREST	4	44811	2943	0.24139	0.09065	0.64279	0.00048	0.13592	TRUE
2	Reaction	CARDIAC DISORDER	4	47871	2943	0.22596	0.08486	0.60169	0.00019	0.13592	TRUE
2	Reaction	CLOSTRIDIUM DIFFICILE COLITIS	4	4626	2943	2.34015	0.8785	6.23372	0.09462	0.13592	FALSE
2	Reaction	COMA	4	21922	2943	0.49348	0.18532	1.31411	0.21272	0.13592	FALSE
2	Reaction	CREATININE RENAL CLEARANCE ABNORMAL	4	233	2943	47.2322	17.588	126.841	0	0.13592	TRUE
2	Reaction	Clostridium difficile infection	4	6320	2943	1.7125	0.64295	4.56127	0.30456	0.13592	FALSE
2	Reaction	DEPRESSED LEVEL OF CONSCIOUSNESS	4	18667	2943	0.57955	0.21763	1.54332	0.34117	0.13592	FALSE
2	Reaction	DEPRESSION	4	119965	2943	0.09016	0.03386	0.24008	0	0.13592	TRUE
2	Reaction	DERMATITIS EXFOLIATIVE	4	4152	2943	2.60756	0.97884	6.94639	0.07002	0.13592	FALSE
2	Reaction	DERMATITIS PSORIASIFORM	4	718	2943	15.1487	5.67368	40.447	0.00017	0.13592	TRUE
2	Reaction	DERMATOMYOSITIS	4	867	2943	12.5332	4.69632	33.4478	0.00034	0.13592	TRUE
2	Reaction	DRY SKIN	4	22794	2943	0.4746	0.17823	1.26382	0.16356	0.13592	FALSE
2	Reaction	EJECTION FRACTION DECREASED	4	6392	2943	1.6932	0.63571	4.50984	0.30751	0.13592	FALSE
2	Reaction	EYE DISORDER	4	13270	2943	0.81533	0.30616	2.17129	1	0.13592	FALSE
2	Reaction	FEBRILE NEUTROPENIA	4	24262	2943	0.44588	0.16744	1.18733	0.12769	0.13592	FALSE
2	Reaction	GASTROINTESTINAL PERFORATION	4	2040	2943	5.31246	1.99324	14.159	0.00741	0.13592	TRUE
2	Reaction	GENERALISED ERYTHEMA	4	4714	2943	2.29643	0.86209	6.1172	0.09958	0.13592	FALSE
2	Reaction	HAEMATURIA	4	17114	2943	0.63216	0.23739	1.68342	0.54532	0.13592	FALSE
2	Reaction	HAEMOLYSIS	4	3872	2943	2.79632	1.04966	7.44949	0.05725	0.13592	FALSE
2	Reaction	HYPERURICAEMIA	4	2060	2943	5.26078	1.97386	14.0212	0.00766	0.13592	TRUE
2	Reaction	INTERNATIONAL NORMALISED RATIO INCREASED	4	21381	2943	0.50597	0.19001	1.34737	0.20969	0.13592	FALSE
2	Reaction	ISCHAEMIC STROKE	4	8226	2943	1.31552	0.49394	3.50364	0.55486	0.13592	FALSE
2	Reaction	KIDNEY TRANSPLANT REJECTION	4	2695	2943	4.01939	1.50843	10.7102	0.01872	0.13592	TRUE
2	Reaction	LEUKOCYTOSIS	4	8781	2943	1.23233	0.46271	3.28204	0.57285	0.13592	FALSE
2	Reaction	METASTASES TO MENINGES	4	686	2943	15.8595	5.93913	42.3502	0.00014	0.13592	TRUE
2	Reaction	MUSCULOSKELETAL PAIN	4	30382	2943	0.35605	0.13371	0.94812	0.02402	0.13592	TRUE
2	Reaction	MUSCULOSKELETAL STIFFNESS	4	33529	2943	0.32263	0.12116	0.85911	0.01004	0.13592	TRUE
2	Reaction	MYOPATHY	4	4086	2943	2.64972	0.99466	7.05876	0.06689	0.13592	FALSE
2	Reaction	NASOPHARYNGITIS	4	67912	2943	0.15928	0.05982	0.42412	0	0.13592	TRUE
2	Reaction	NECK PAIN	4	24676	2943	0.4384	0.16463	1.16741	0.09596	0.13592	FALSE
2	Reaction	NEOPLASM	4	4792	2943	2.25902	0.84805	6.01751	0.10408	0.13592	FALSE
2	Reaction	NEURALGIA	4	8871	2943	1.21982	0.45802	3.24872	0.57607	0.13592	FALSE
2	Reaction	PALPITATIONS	4	53232	2943	0.2032	0.07631	0.54109	4e-05	0.13592	TRUE
2	Reaction	PRODUCTIVE COUGH	4	15106	2943	0.71621	0.26895	1.90728	0.67144	0.13592	FALSE
2	Reaction	PSEUDOMONAS INFECTION	4	3374	2943	3.20955	1.20468	8.55097	0.03795	0.13592	TRUE
2	Reaction	RASH MACULAR	4	12068	2943	0.89657	0.33666	2.38766	1	0.13592	FALSE
2	Reaction	RENAL FAILURE ACUTE	4	44749	2943	0.24173	0.09078	0.64368	0.00048	0.13592	TRUE
2	Reaction	STENT PLACEMENT	4	4626	2943	2.34015	0.8785	6.23372	0.09462	0.13592	FALSE
2	Reaction	SUPRAVENTRICULAR TACHYCARDIA	4	5146	2943	2.1035	0.78969	5.60307	0.12561	0.13592	FALSE
2	Reaction	THERAPEUTIC RESPONSE UNEXPECTED	4	20561	2943	0.52616	0.19758	1.40112	0.27076	0.13592	FALSE
2	Reaction	THIRST	4	7503	2943	1.44235	0.54155	3.84152	0.3645	0.13592	FALSE
2	Reaction	THYROXINE FREE ABNORMAL	4	36	2943	338.005	119.611	955.162	0	0.13592	TRUE
2	Reaction	THYROXINE FREE DECREASED	4	184	2943	60.0898	22.3242	161.743	0	0.13592	TRUE
2	Reaction	TRANSIENT ISCHAEMIC ATTACK	4	20250	2943	0.53424	0.20062	1.42264	0.26896	0.13592	FALSE
2	Reaction	UPPER RESPIRATORY TRACT INFECTION	4	19487	2943	0.55516	0.20848	1.47836	0.34531	0.13592	FALSE
2	Reaction	VASCULITIS	4	5474	2943	1.97736	0.74235	5.26697	0.14707	0.13592	FALSE
2	Reaction	WHITE BLOOD CELL DISORDER	4	1058	2943	10.262	3.84686	27.3753	0.00071	0.13592	TRUE
2	Reaction	WOUND INFECTION	4	3888	2943	2.7848	1.04534	7.41879	0.05794	0.13592	FALSE
2	Reaction	ABDOMINAL DISCOMFORT	3	57474	2943	0.14115	0.04555	0.43742	0	0.10194	TRUE
2	Reaction	ACUTE PULMONARY OEDEMA	3	3163	2943	2.56713	0.82797	7.95941	0.11386	0.10194	FALSE
2	Reaction	ANXIETY	3	129403	2943	0.06269	0.02023	0.19427	0	0.10194	TRUE
2	Reaction	APLASIA PURE RED CELL	3	1879	2943	4.32416	1.39415	13.412	0.03344	0.10194	TRUE
2	Reaction	APLASTIC ANAEMIA	3	2389	2943	3.39989	1.09637	10.5432	0.06005	0.10194	FALSE
2	Reaction	ASPIRATION	3	5241	2943	1.54871	0.49961	4.80076	0.45032	0.10194	FALSE
2	Reaction	ATRIAL FLUTTER	3	4073	2943	1.99315	0.64292	6.17905	0.19253	0.10194	FALSE
2	Reaction	ATRIOVENTRICULAR BLOCK COMPLETE	3	3351	2943	2.42298	0.7815	7.51224	0.12897	0.10194	FALSE
2	Reaction	AUTOIMMUNE NEUROPATHY	3	35	2943	253.504	77.67	827.402	0	0.10194	TRUE
2	Reaction	Adrenocorticotropic hormone deficiency	3	35	2943	253.504	77.67	827.402	0	0.10194	TRUE
2	Reaction	BACTERAEMIA	3	4471	2943	1.81561	0.58568	5.62842	0.23034	0.10194	FALSE
2	Reaction	BALANCE DISORDER	3	40220	2943	0.20171	0.06509	0.62509	0.00039	0.10194	TRUE
2	Reaction	BICYTOPENIA	3	403	2943	20.2803	6.5168	63.1125	0.00049	0.10194	TRUE
2	Reaction	BIOPSY	3	443	2943	18.4367	5.92665	57.3529	0.00064	0.10194	TRUE
2	Reaction	BLOOD ALBUMIN DECREASED	3	4898	2943	1.65723	0.5346	5.13727	0.27222	0.10194	FALSE
2	Reaction	BLOOD ELECTROLYTES ABNORMAL	3	724	2943	11.2512	3.62225	34.9479	0.00261	0.10194	TRUE
2	Reaction	BLOOD POTASSIUM DECREASED	3	14401	2943	0.56342	0.18179	1.74616	0.50858	0.10194	FALSE
2	Reaction	BONE PAIN	3	26233	2943	0.30927	0.09979	0.95844	0.02344	0.10194	TRUE
2	Reaction	BRADYCARDIA	3	24140	2943	0.33609	0.10845	1.04155	0.04264	0.10194	TRUE
2	Reaction	BRONCHITIS	3	36079	2943	0.22486	0.07256	0.69685	0.00142	0.10194	TRUE
2	Reaction	CARDIAC PACEMAKER INSERTION	3	3308	2943	2.4545	0.79166	7.61003	0.12545	0.10194	FALSE
2	Reaction	CARDIOMEGALY	3	8696	2943	0.93318	0.30108	2.89234	1	0.10194	FALSE
2	Reaction	CARDIOTOXICITY	3	2222	2943	3.65576	1.17881	11.3373	0.0505	0.10194	FALSE
2	Reaction	CEREBRAL THROMBOSIS	3	1635	2943	4.97067	1.60237	15.4194	0.02351	0.10194	TRUE
2	Reaction	CHOLECYSTITIS ACUTE	3	3152	2943	2.5761	0.83086	7.98723	0.11299	0.10194	FALSE
2	Reaction	CHOLELITHIASIS	3	19137	2943	0.42396	0.1368	1.31392	0.18128	0.10194	FALSE
2	Reaction	CHRONIC OBSTRUCTIVE PULMONARY DISEASE	3	24539	2943	0.33062	0.10668	1.02462	0.04328	0.10194	TRUE
2	Reaction	COAGULOPATHY	3	9243	2943	0.87794	0.28326	2.72109	1	0.10194	FALSE
2	Reaction	COLD SWEAT	3	8753	2943	0.9271	0.29912	2.8735	1	0.10194	FALSE
2	Reaction	COMA HEPATIC	3	578	2943	14.1081	4.53927	43.8478	0.00138	0.10194	TRUE
2	Reaction	CONDITION AGGRAVATED	3	89912	2943	0.09023	0.02912	0.2796	0	0.10194	TRUE
2	Reaction	CORONARY ARTERY DISEASE	3	24138	2943	0.33611	0.10846	1.04164	0.04264	0.10194	TRUE
2	Reaction	CYSTITIS	3	14476	2943	0.5605	0.18085	1.73711	0.50949	0.10194	FALSE
2	Reaction	DIABETES INSIPIDUS	3	1031	2943	7.89118	2.54229	24.4939	0.00693	0.10194	TRUE
2	Reaction	DIABETES MELLITUS INADEQUATE CONTROL	3	8118	2943	0.99965	0.32252	3.0984	1	0.10194	FALSE
2	Reaction	DISORIENTATION	3	22101	2943	0.3671	0.11845	1.13767	0.0768	0.10194	FALSE
2	Reaction	DRUG INTERACTION	3	70743	2943	0.11468	0.037	0.35537	0	0.10194	TRUE
2	Reaction	DUODENAL ULCER	3	3711	2943	2.18774	0.70566	6.78256	0.15969	0.10194	FALSE
2	Reaction	DYSARTHRIA	3	19129	2943	0.42414	0.13686	1.31447	0.18121	0.10194	FALSE
2	Reaction	DYSPHONIA	3	23687	2943	0.34252	0.11052	1.06148	0.05888	0.10194	FALSE
2	Reaction	DYSURIA	3	17906	2943	0.45312	0.14621	1.40427	0.2364	0.10194	FALSE
2	Reaction	Drug effect incomplete	3	20916	2943	0.3879	0.12517	1.20214	0.10197	0.10194	FALSE
2	Reaction	EPISTAXIS	3	33301	2943	0.24362	0.07861	0.75499	0.00376	0.10194	TRUE
2	Reaction	ERYSIPELAS	3	2070	2943	3.92459	1.26543	12.1717	0.0425	0.10194	TRUE
2	Reaction	EYE INFLAMMATION	3	2369	2943	3.42863	1.10563	10.6324	0.05887	0.10194	FALSE
2	Reaction	FACE OEDEMA	3	8889	2943	0.91291	0.29454	2.82951	1	0.10194	FALSE
2	Reaction	FEELING COLD	3	12953	2943	0.62642	0.20212	1.94143	0.64265	0.10194	FALSE
2	Reaction	FUNCTIONAL GASTROINTESTINAL DISORDER	3	1299	2943	6.25936	2.01726	19.4222	0.0129	0.10194	TRUE
2	Reaction	Facial paralysis	3	1415	2943	5.74513	1.85173	17.8247	0.01617	0.10194	TRUE
2	Reaction	GASTRIC DISORDER	3	16456	2943	0.49305	0.15909	1.52804	0.30484	0.10194	FALSE
2	Reaction	GOITRE	3	2264	2943	3.58785	1.15693	11.1265	0.05282	0.10194	FALSE
2	Reaction	HAEMATOMA	3	13379	2943	0.60647	0.19568	1.87959	0.50221	0.10194	FALSE
2	Reaction	HAEMODIALYSIS	3	7742	2943	1.04821	0.33819	3.24897	0.76586	0.10194	FALSE
2	Reaction	HAIR COLOUR CHANGES	3	2513	2943	3.23192	1.04224	10.022	0.06765	0.10194	FALSE
2	Reaction	HALLUCINATION	3	30454	2943	0.2664	0.08596	0.82558	0.00988	0.10194	TRUE
2	Reaction	HEPATIC PAIN	3	1881	2943	4.31956	1.39267	13.3977	0.03353	0.10194	TRUE
2	Reaction	HYPERSOMNIA	3	12395	2943	0.65463	0.21122	2.02886	0.63947	0.10194	FALSE
2	Reaction	HYPOMAGNESAEMIA	3	5117	2943	1.58626	0.51172	4.9172	0.44469	0.10194	FALSE
2	Reaction	HYPOPHOSPHATAEMIA	3	2939	2943	2.76299	0.8911	8.56702	0.09681	0.10194	FALSE
2	Reaction	ILEUS PARALYTIC	3	2310	2943	3.51631	1.13388	10.9045	0.05543	0.10194	FALSE
2	Reaction	INAPPROPRIATE ANTIDIURETIC HORMONE SECRETION	3	4373	2943	1.85632	0.5988	5.75469	0.2209	0.10194	FALSE
2	Reaction	INTRACRANIAL PRESSURE INCREASED	3	2533	2943	3.20638	1.03401	9.94273	0.06892	0.10194	FALSE
2	Reaction	IRIDOCYCLITIS	3	894	2943	9.10452	2.93245	28.2673	0.00469	0.10194	TRUE
2	Reaction	KIDNEY FIBROSIS	3	796	2943	10.2297	3.29407	31.7681	0.0034	0.10194	TRUE
2	Reaction	LABORATORY TEST ABNORMAL	3	10274	2943	0.78981	0.25483	2.4479	1	0.10194	FALSE
2	Reaction	LARGE INTESTINE PERFORATION	3	3256	2943	2.49374	0.80431	7.73174	0.12124	0.10194	FALSE
2	Reaction	LICHENOID KERATOSIS	3	741	2943	10.9921	3.539	34.141	0.00278	0.10194	TRUE
2	Reaction	LYMPHADENECTOMY	3	494	2943	16.5217	5.31317	51.3751	0.00088	0.10194	TRUE
2	Reaction	METASTASES TO GASTROINTESTINAL TRACT	3	152	2943	54.4438	17.371	170.637	3e-05	0.10194	TRUE
2	Reaction	MOBILITY DECREASED	3	28082	2943	0.2889	0.09322	0.89532	0.01792	0.10194	TRUE
2	Reaction	MOOD ALTERED	3	13097	2943	0.61953	0.1999	1.92008	0.64393	0.10194	FALSE
2	Reaction	MYASTHENIC SYNDROME	3	179	2943	46.0916	14.7316	144.21	5e-05	0.10194	TRUE
2	Reaction	NON-CARDIAC CHEST PAIN	3	2156	2943	3.76783	1.21492	11.6851	0.04694	0.10194	TRUE
2	Reaction	OESOPHAGITIS	3	5774	2943	1.40567	0.45348	4.35724	0.47787	0.10194	FALSE
2	Reaction	ORAL CANDIDIASIS	3	5420	2943	1.49753	0.4831	4.64207	0.45901	0.10194	FALSE
2	Reaction	ORAL PAIN	3	10228	2943	0.79336	0.25598	2.45891	1	0.10194	FALSE
2	Reaction	OROPHARYNGEAL PAIN	3	36281	2943	0.22361	0.07216	0.69297	0.00143	0.10194	TRUE
2	Reaction	PALMAR-PLANTAR ERYTHRODYSAESTHESIA SYNDROME	3	9098	2943	0.89193	0.28777	2.76448	1	0.10194	FALSE
2	Reaction	PANCREATIC ENZYMES INCREASED	3	755	2943	10.7874	3.47326	33.504	0.00293	0.10194	TRUE
2	Reaction	PAPILLOEDEMA	3	2190	2943	3.70925	1.19605	11.5033	0.04876	0.10194	TRUE
2	Reaction	PAPULE	3	1776	2943	4.57537	1.47506	14.1919	0.02903	0.10194	TRUE
2	Reaction	PARALYSIS	3	7185	2943	1.12951	0.36441	3.501	0.75221	0.10194	FALSE
2	Reaction	PERICARDIAL EFFUSION	3	10008	2943	0.81081	0.2616	2.51299	1	0.10194	FALSE
2	Reaction	PERIPHERAL MOTOR NEUROPATHY	3	647	2943	12.5965	4.0542	39.1375	0.0019	0.10194	TRUE
2	Reaction	PERIPHERAL SENSORY NEUROPATHY	3	2332	2943	3.4831	1.12318	10.8014	0.0567	0.10194	FALSE
2	Reaction	PIGMENTATION DISORDER	3	2513	2943	3.23192	1.04224	10.022	0.06765	0.10194	FALSE
2	Reaction	PLASMAPHERESIS	3	276	2943	29.7148	9.52968	92.6545	0.00016	0.10194	TRUE
2	Reaction	PLATELET DISORDER	3	937	2943	8.68536	2.79769	26.9635	0.00534	0.10194	TRUE
2	Reaction	PLATELET TRANSFUSION	3	348	2943	23.5134	7.55062	73.2232	0.00032	0.10194	TRUE
2	Reaction	PNEUMOTHORAX	3	6445	2943	1.25926	0.40626	3.90327	0.51798	0.10194	FALSE
2	Reaction	POLYNEUROPATHY	3	3693	2943	2.19841	0.7091	6.81566	0.1581	0.10194	FALSE
2	Reaction	PREMATURE DELIVERY	3	3868	2943	2.09887	0.67701	6.50693	0.17372	0.10194	FALSE
2	Reaction	PRERENAL FAILURE	3	437	2943	18.6915	6.00826	58.1489	0.00062	0.10194	TRUE
2	Reaction	PRESYNCOPE	3	10517	2943	0.77156	0.24894	2.39132	1	0.10194	FALSE
2	Reaction	PSORIASIS	3	45866	2943	0.17688	0.05708	0.54814	8e-05	0.10194	TRUE
2	Reaction	PULMONARY MASS	3	4877	2943	1.66437	0.53691	5.15942	0.27014	0.10194	FALSE
2	Reaction	QUADRIPLEGIA	3	1064	2943	7.64574	2.46334	23.7309	0.00755	0.10194	TRUE
2	Reaction	RADIATION NECROSIS	3	106	2943	78.7585	25.0028	248.089	1e-05	0.10194	TRUE
2	Reaction	RADIATION SKIN INJURY	3	684	2943	11.9121	3.83448	37.0058	0.00222	0.10194	TRUE
2	Reaction	RECTAL HAEMORRHAGE	3	21698	2943	0.37392	0.12065	1.1588	0.07614	0.10194	FALSE
2	Reaction	RESPIRATORY TRACT CONGESTION	3	7293	2943	1.11277	0.35901	3.44912	0.7547	0.10194	FALSE
2	Reaction	RHINORRHOEA	3	21979	2943	0.36914	0.11911	1.14398	0.07651	0.10194	FALSE
2	Reaction	SHOCK HAEMORRHAGIC	3	3120	2943	2.60254	0.83939	8.06927	0.1105	0.10194	FALSE
2	Reaction	SINUS TACHYCARDIA	3	7436	2943	1.09137	0.3521	3.38275	0.75812	0.10194	FALSE
2	Reaction	SKIN LESION	3	10785	2943	0.75238	0.24275	2.33187	1	0.10194	FALSE
2	Reaction	SKIN NEOPLASM EXCISION	3	347	2943	23.5818	7.57246	73.4371	0.00032	0.10194	TRUE
2	Reaction	SKIN ULCER	3	11017	2943	0.73653	0.23764	2.28274	0.80459	0.10194	FALSE
2	Reaction	SPINAL CORD COMPRESSION	3	1815	2943	4.47689	1.44334	13.8862	0.03066	0.10194	TRUE
2	Reaction	SPLENOMEGALY	3	5372	2943	1.51092	0.48742	4.68359	0.45662	0.10194	FALSE
2	Reaction	SQUAMOUS CELL CARCINOMA	3	4087	2943	1.98632	0.64072	6.15786	0.19384	0.10194	FALSE
2	Reaction	STAPHYLOCOCCAL INFECTION	3	18353	2943	0.44208	0.14265	1.37006	0.17707	0.10194	FALSE
2	Reaction	SYSTEMIC INFLAMMATORY RESPONSE SYNDROME	3	1840	2943	4.41597	1.42372	13.697	0.03173	0.10194	TRUE
2	Reaction	THORACIC CAVITY DRAINAGE	3	162	2943	51.0197	16.29	159.792	3e-05	0.10194	TRUE
2	Reaction	TROPONIN INCREASED	3	2874	2943	2.82554	0.91127	8.76109	0.09207	0.10194	FALSE
2	Reaction	TUMOUR HAEMORRHAGE	3	1116	2943	7.28853	2.34843	22.6205	0.00859	0.10194	TRUE
2	Reaction	TYPE 2 DIABETES MELLITUS	3	19756	2943	0.41068	0.13251	1.27274	0.13497	0.10194	FALSE
2	Reaction	Tumour pseudoprogression	3	49	2943	176.351	54.8778	566.705	0	0.10194	TRUE
2	Reaction	UPPER GASTROINTESTINAL HAEMORRHAGE	3	7700	2943	1.05393	0.34003	3.2667	0.76477	0.10194	FALSE
2	Reaction	VERTIGO	3	27119	2943	0.29916	0.09653	0.92712	0.02448	0.10194	TRUE
2	Reaction	VIRAL INFECTION	3	13985	2943	0.58018	0.1872	1.79812	0.50461	0.10194	FALSE
2	Reaction	VIRAL UPPER RESPIRATORY TRACT INFECTION	3	3973	2943	2.04336	0.65911	6.33476	0.18329	0.10194	FALSE
2	Reaction	ABDOMINAL CAVITY DRAINAGE	2	211	2943	25.876	6.43171	104.104	0.00288	0.06796	TRUE
2	Reaction	ABNORMAL FAECES	2	3007	2943	1.7997	0.45009	7.19609	0.30524	0.06796	FALSE
2	Reaction	ACUTE HEPATIC FAILURE	2	5431	2943	0.99615	0.24918	3.98228	1	0.06796	FALSE
2	Reaction	ADRENAL DISORDER	2	796	2943	6.81119	1.70125	27.2695	0.03563	0.06796	TRUE
2	Reaction	AGEUSIA	2	11044	2943	0.48977	0.12253	1.9577	0.45377	0.06796	FALSE
2	Reaction	ALVEOLITIS	2	978	2943	5.54107	1.38446	22.1772	0.05151	0.06796	FALSE
2	Reaction	AMPUTATION	2	537	2943	10.1086	2.52272	40.5052	0.01725	0.06796	TRUE
2	Reaction	ANAPHYLACTIC REACTION	2	20562	2943	0.26304	0.06581	1.05135	0.04222	0.06796	TRUE
2	Reaction	ANGIOEDEMA	2	18699	2943	0.28925	0.07237	1.15611	0.05609	0.06796	FALSE
2	Reaction	ANTI-THYROID ANTIBODY POSITIVE	2	226	2943	24.1432	6.00367	97.09	0.00329	0.06796	TRUE
2	Reaction	APPENDICITIS	2	3683	2943	1.46919	0.36747	5.87406	0.39487	0.06796	FALSE
2	Reaction	ARTERIAL OCCLUSIVE DISEASE	2	4657	2943	1.16178	0.2906	4.64462	0.69217	0.06796	FALSE
2	Reaction	ARTHROPATHY	2	21035	2943	0.25712	0.06433	1.0277	0.0299	0.06796	TRUE
2	Reaction	ASTHMA	2	33594	2943	0.16099	0.04028	0.64346	0.00085	0.06796	TRUE
2	Reaction	ATELECTASIS	2	6205	2943	0.87185	0.2181	3.48526	1	0.06796	FALSE
2	Reaction	AUTOIMMUNE ARTHRITIS	2	20	2943	300.449	69.7438	1294.31	3e-05	0.06796	TRUE
2	Reaction	AUTOIMMUNE DISORDER	2	2268	2943	2.38662	0.59679	9.54435	0.20507	0.06796	FALSE
2	Reaction	AUTOIMMUNE MYOCARDITIS	2	26	2943	225.337	53.2783	953.048	4e-05	0.06796	TRUE
2	Reaction	AUTOIMMUNE NEUTROPENIA	2	89	2943	62.1619	15.309	252.408	0.00052	0.06796	TRUE
2	Reaction	BASAL CELL CARCINOMA	2	5972	2943	0.90588	0.22661	3.62132	1	0.06796	FALSE
2	Reaction	BLOOD CORTICOTROPHIN DECREASED	2	162	2943	33.8005	8.38446	136.261	0.00171	0.06796	TRUE
2	Reaction	BLOOD CORTISOL DECREASED	2	701	2943	7.73689	1.93201	30.983	0.02827	0.06796	TRUE
2	Reaction	BLOOD POTASSIUM ABNORMAL	2	1029	2943	5.26591	1.3158	21.0744	0.05634	0.06796	FALSE
2	Reaction	BLOOD PRESSURE DECREASED	2	31060	2943	0.17413	0.04357	0.69596	0.0016	0.06796	TRUE
2	Reaction	BRAIN HERNIATION	2	1438	2943	3.76608	0.9414	15.0663	0.09989	0.06796	FALSE
2	Reaction	BRAIN OPERATION	2	778	2943	6.96918	1.74064	27.9032	0.03419	0.06796	TRUE
2	Reaction	BREAST CANCER	2	31012	2943	0.1744	0.04363	0.69704	0.00159	0.06796	TRUE
2	Reaction	CARDIAC FAILURE CONGESTIVE	2	58893	2943	0.09183	0.02298	0.36703	0	0.06796	TRUE
2	Reaction	CARDIO-RESPIRATORY ARREST	2	24123	2943	0.22421	0.0561	0.89613	0.01138	0.06796	TRUE
2	Reaction	CARDIOVASCULAR DISORDER	2	20461	2943	0.26434	0.06614	1.05654	0.04193	0.06796	TRUE
2	Reaction	CATARACT	2	22214	2943	0.24348	0.06092	0.97315	0.02177	0.06796	TRUE
2	Reaction	CATARACT OPERATION	2	3318	2943	1.63091	0.4079	6.5209	0.347	0.06796	FALSE
2	Reaction	CAUDA EQUINA SYNDROME	2	371	2943	14.6561	3.65335	58.7954	0.00857	0.06796	TRUE
2	Reaction	CELL DEATH	2	756	2943	7.17253	1.79134	28.7188	0.03245	0.06796	TRUE
2	Reaction	CENTRAL NERVOUS SYSTEM HAEMORRHAGE	2	158	2943	34.6672	8.59755	139.786	0.00163	0.06796	TRUE
2	Reaction	CHEILITIS	2	3027	2943	1.7878	0.44712	7.14849	0.30795	0.06796	FALSE
2	Reaction	CHROMATURIA	2	11405	2943	0.47427	0.11865	1.89572	0.45723	0.06796	FALSE
2	Reaction	CLAVICLE FRACTURE	2	1658	2943	3.26575	0.81644	13.063	0.12614	0.06796	FALSE
2	Reaction	COGNITIVE DISORDER	2	19295	2943	0.28031	0.07013	1.1204	0.05713	0.06796	FALSE
2	Reaction	COLITIS ULCERATIVE	2	11197	2943	0.48308	0.12086	1.93095	0.45501	0.06796	FALSE
2	Reaction	CORNEAL PERFORATION	2	257	2943	21.2082	5.27776	85.223	0.00422	0.06796	TRUE
2	Reaction	CREATININE RENAL CLEARANCE DECREASED	2	2223	2943	2.43498	0.60887	9.73785	0.19904	0.06796	FALSE
2	Reaction	CYANOSIS	2	8830	2943	0.61261	0.15326	2.44876	0.77826	0.06796	FALSE
2	Reaction	CYTOMEGALOVIRUS INFECTION	2	5907	2943	0.91585	0.2291	3.66119	1	0.06796	FALSE
2	Reaction	CYTOMEGALOVIRUS TEST POSITIVE	2	833	2943	6.50793	1.62563	26.0533	0.03868	0.06796	TRUE
2	Reaction	DEAFNESS NEUROSENSORY	2	1424	2943	3.80315	0.95066	15.2147	0.09828	0.06796	FALSE
2	Reaction	DEMENTIA	2	9335	2943	0.57946	0.14496	2.31624	0.78263	0.06796	FALSE
2	Reaction	DERMATITIS BULLOUS	2	3345	2943	1.61773	0.4046	6.46821	0.35058	0.06796	FALSE
2	Reaction	DIABETIC COMA	2	2112	2943	2.56307	0.64088	10.2505	0.18429	0.06796	FALSE
2	Reaction	DIALYSIS	2	8343	2943	0.64837	0.1622	2.59176	0.77606	0.06796	FALSE
2	Reaction	DIFFUSE ALVEOLAR DAMAGE	2	582	2943	9.32429	2.32746	37.3551	0.02005	0.06796	TRUE
2	Reaction	DISEASE RECURRENCE	2	10341	2943	0.52308	0.13086	2.09084	0.60155	0.06796	FALSE
2	Reaction	DRUG TOLERANCE DECREASED	2	567	2943	9.57183	2.3891	38.3492	0.0191	0.06796	TRUE
2	Reaction	DUODENITIS	2	1692	2943	3.20005	0.80003	12.8	0.13033	0.06796	FALSE
2	Reaction	DYSAESTHESIA	2	1382	2943	3.9189	0.97956	15.6783	0.09349	0.06796	FALSE
2	Reaction	DYSCHEZIA	2	271	2943	20.1044	5.0045	80.7648	0.00468	0.06796	TRUE
2	Reaction	DYSKINESIA	2	19876	2943	0.27212	0.06808	1.08764	0.041	0.06796	TRUE
2	Reaction	DYSPEPSIA	2	43861	2943	0.12331	0.03085	0.49283	3e-05	0.06796	TRUE
2	Reaction	DYSSTASIA	2	13538	2943	0.39953	0.09996	1.59696	0.25764	0.06796	FALSE
2	Reaction	EATING DISORDER	2	9050	2943	0.59771	0.14953	2.38921	0.77992	0.06796	FALSE
2	Reaction	ENTEROCOLITIS INFECTIOUS	2	602	2943	9.01348	2.25005	36.107	0.02135	0.06796	TRUE
2	Reaction	EOSINOPHILIC PNEUMONIA	2	1205	2943	4.4955	1.12352	17.9877	0.0741	0.06796	FALSE
2	Reaction	EPIDIDYMITIS	2	543	2943	9.99646	2.49481	40.0549	0.01762	0.06796	TRUE
2	Reaction	ESCHERICHIA SEPSIS	2	1460	2943	3.70925	0.92721	14.8387	0.10244	0.06796	FALSE
2	Reaction	EXTRAVASATION	2	2266	2943	2.38873	0.59732	9.55278	0.2048	0.06796	FALSE
2	Reaction	EXTREMITY NECROSIS	2	831	2943	6.52363	1.62955	26.1163	0.03851	0.06796	TRUE
2	Reaction	EYE IRRITATION	2	17794	2943	0.30396	0.07605	1.21493	0.07677	0.06796	FALSE
2	Reaction	EYE PAIN	2	19585	2943	0.27616	0.06909	1.1038	0.05825	0.06796	FALSE
2	Reaction	EYELID PTOSIS	2	4484	2943	1.20662	0.30181	4.82395	0.68402	0.06796	FALSE
2	Reaction	Eosinophilic granulomatosis with polyangiitis	2	107	2943	51.5056	12.7189	208.573	0.00076	0.06796	TRUE
2	Reaction	FIBRIN D DIMER INCREASED	2	1680	2943	3.22294	0.80574	12.8916	0.12885	0.06796	FALSE
2	Reaction	FINGER AMPUTATION	2	411	2943	13.2227	3.29726	53.0258	0.01041	0.06796	TRUE
2	Reaction	FLUSHING	2	58352	2943	0.09268	0.02319	0.37043	0	0.06796	TRUE
2	Reaction	FOLLICULITIS	2	1743	2943	3.10631	0.77661	12.4247	0.13668	0.06796	FALSE
2	Reaction	Faeces soft	2	1166	2943	4.64612	1.16112	18.5911	0.07002	0.06796	FALSE
2	Reaction	GAMMA RADIATION THERAPY	2	10	2943	676.011	143.612	3182.12	1e-05	0.06796	TRUE
2	Reaction	GASTROENTERITIS EOSINOPHILIC	2	151	2943	36.2959	8.99773	146.414	0.00149	0.06796	TRUE
2	Reaction	GASTROINTESTINAL OEDEMA	2	792	2943	6.84568	1.70985	27.4078	0.03531	0.06796	TRUE
2	Reaction	GENERALISED OEDEMA	2	6240	2943	0.86696	0.21687	3.4657	1	0.06796	FALSE
2	Reaction	GINGIVITIS	2	2730	2943	1.98244	0.49577	7.92714	0.26764	0.06796	FALSE
2	Reaction	GLOSSITIS	2	1838	2943	2.94558	0.73646	11.7814	0.14867	0.06796	FALSE
2	Reaction	GRANULOMA	2	1746	2943	3.10097	0.77527	12.4033	0.13705	0.06796	FALSE
2	Reaction	Generalised tonic-clonic seizure	2	3959	2943	1.36671	0.34184	5.4642	0.66124	0.06796	FALSE
2	Reaction	HAEMORRHAGIC STROKE	2	4217	2943	1.28306	0.32093	5.12963	0.672	0.06796	FALSE
2	Reaction	HEMIPLEGIA	2	4562	2943	1.18598	0.29665	4.74141	0.68767	0.06796	FALSE
2	Reaction	HEPATIC ENCEPHALOPATHY	2	4627	2943	1.16932	0.29249	4.67476	0.69074	0.06796	FALSE
2	Reaction	HEPATIC LESION	2	1867	2943	2.89978	0.72501	11.598	0.15237	0.06796	FALSE
2	Reaction	HEPATIC NECROSIS	2	2595	2943	2.08565	0.52157	8.34008	0.24927	0.06796	FALSE
2	Reaction	HEPATITIS B	2	3718	2943	1.45535	0.36401	5.81871	0.39938	0.06796	FALSE
2	Reaction	HEPATOBILIARY DISEASE	2	244	2943	22.3475	5.55966	89.8272	0.00382	0.06796	TRUE
2	Reaction	HIP FRACTURE	2	14083	2943	0.38407	0.09609	1.53515	0.26363	0.06796	FALSE
2	Reaction	HOSPICE CARE	2	1566	2943	3.45786	0.86442	13.8321	0.11497	0.06796	FALSE
2	Reaction	HYDRONEPHROSIS	2	3454	2943	1.56665	0.39183	6.26389	0.365	0.06796	FALSE
2	Reaction	HYPERBILIRUBINAEMIA	2	4405	2943	1.22827	0.30723	4.91053	0.68039	0.06796	FALSE
2	Reaction	HYPERNATRAEMIA	2	2261	2943	2.39402	0.59864	9.57394	0.20413	0.06796	FALSE
2	Reaction	HYPOACUSIS	2	10646	2943	0.50809	0.12711	2.03092	0.45219	0.06796	FALSE
2	Reaction	HYPOTHERMIA	2	4653	2943	1.16278	0.29085	4.64861	0.69198	0.06796	FALSE
2	Reaction	Hypersensitivity vasculitis	2	1113	2943	4.86776	1.21644	19.4791	0.06461	0.06796	FALSE
2	Reaction	IMPAIRED GASTRIC EMPTYING	2	3145	2943	1.72068	0.43034	6.87999	0.32385	0.06796	FALSE
2	Reaction	INCONTINENCE	2	5138	2943	1.05298	0.26339	4.20952	0.71573	0.06796	FALSE
2	Reaction	INCREASED APPETITE	2	7607	2943	0.71112	0.1779	2.84263	1	0.06796	FALSE
2	Reaction	INFREQUENT BOWEL MOVEMENTS	2	1095	2943	4.94793	1.23645	19.8003	0.0628	0.06796	FALSE
2	Reaction	INTRA-ABDOMINAL HAEMORRHAGE	2	1291	2943	4.19557	1.04864	16.7863	0.08335	0.06796	FALSE
2	Reaction	INTRACRANIAL TUMOUR HAEMORRHAGE	2	181	2943	30.2128	7.50135	121.686	0.00213	0.06796	TRUE
2	Reaction	INTRAOCULAR PRESSURE INCREASED	2	6179	2943	0.87552	0.21901	3.49994	1	0.06796	FALSE
2	Reaction	INTUSSUSCEPTION	2	348	2943	15.6303	3.89523	62.7194	0.00758	0.06796	TRUE
2	Reaction	IRRITABILITY	2	32837	2943	0.1647	0.04121	0.6583	0.00081	0.06796	TRUE
2	Reaction	JAUNDICE CHOLESTATIC	2	1880	2943	2.87971	0.72	11.5177	0.15404	0.06796	FALSE
2	Reaction	JOINT SWELLING	2	41346	2943	0.13081	0.03273	0.52281	5e-05	0.06796	TRUE
2	Reaction	LACTIC ACIDOSIS	2	10173	2943	0.53172	0.13302	2.12538	0.59955	0.06796	FALSE
2	Reaction	LEUKOPLAKIA	2	141	2943	38.9071	9.63864	157.051	0.0013	0.06796	TRUE
2	Reaction	LICHEN PLANUS	2	987	2943	5.49044	1.37183	21.9743	0.05235	0.06796	FALSE
2	Reaction	LIVER CARCINOMA RUPTURED	2	82	2943	67.6011	16.6256	274.872	0.00044	0.06796	TRUE
2	Reaction	LIVER INJURY	2	6166	2943	0.87737	0.21948	3.50732	1	0.06796	FALSE
2	Reaction	LUNG OPERATION	2	346	2943	15.7212	3.91778	63.0855	0.00749	0.06796	TRUE
2	Reaction	LYMPHOCYTE COUNT INCREASED	2	1259	2943	4.30238	1.07531	17.2141	0.07987	0.06796	FALSE
2	Reaction	LYMPHOCYTOSIS	2	996	2943	5.44073	1.35942	21.7751	0.0532	0.06796	FALSE
2	Reaction	LYMPHOEDEMA	2	2531	2943	2.13843	0.53476	8.55125	0.24058	0.06796	FALSE
2	Reaction	MEDIASTINAL HAEMORRHAGE	2	71	2943	78.3781	19.2236	319.562	0.00033	0.06796	TRUE
2	Reaction	MENINGITIS BACTERIAL	2	664	2943	8.16931	2.03976	32.7183	0.02559	0.06796	TRUE
2	Reaction	METABOLIC ACIDOSIS	2	12094	2943	0.44724	0.11189	1.78769	0.34167	0.06796	FALSE
2	Reaction	METASTASES TO SPINE	2	1378	2943	3.9303	0.98241	15.7239	0.09303	0.06796	FALSE
2	Reaction	MOLE EXCISION	2	151	2943	36.2959	8.99773	146.414	0.00149	0.06796	TRUE
2	Reaction	MONOPLEGIA	2	2273	2943	2.38137	0.59548	9.52332	0.20574	0.06796	FALSE
2	Reaction	MOUTH ULCERATION	2	8610	2943	0.62826	0.15717	2.51136	0.77701	0.06796	FALSE
2	Reaction	MUCOCUTANEOUS RASH	2	61	2943	91.6625	22.4065	374.98	0.00025	0.06796	TRUE
2	Reaction	MUSCULOSKELETAL DISORDER	2	8548	2943	0.63282	0.15831	2.52958	0.77673	0.06796	FALSE
2	Reaction	NASAL CONGESTION	2	21355	2943	0.25327	0.06337	1.0123	0.03022	0.06796	TRUE
2	Reaction	NECK MASS	2	1141	2943	4.7481	1.18657	18.9996	0.06745	0.06796	FALSE
2	Reaction	NEPHRITIS AUTOIMMUNE	2	27	2943	216.323	51.2609	912.895	5e-05	0.06796	TRUE
2	Reaction	NEPHROTIC SYNDROME	2	3028	2943	1.78721	0.44697	7.14612	0.30808	0.06796	FALSE
2	Reaction	NERVE COMPRESSION	2	3814	2943	1.4187	0.35484	5.67212	0.41166	0.06796	FALSE
2	Reaction	NEUROLOGICAL SYMPTOM	2	2669	2943	2.02778	0.50711	8.10855	0.25934	0.06796	FALSE
2	Reaction	NEUTROPHIL COUNT INCREASED	2	5232	2943	1.03405	0.25866	4.13384	0.72042	0.06796	FALSE
2	Reaction	NODULE	2	5226	2943	1.03524	0.25896	4.13859	0.72012	0.06796	FALSE
2	Reaction	NORMOCHROMIC NORMOCYTIC ANAEMIA	2	2010	2943	2.69327	0.67342	10.7715	0.17087	0.06796	FALSE
2	Reaction	OESOPHAGEAL ULCER	2	2254	2943	2.40146	0.6005	9.60372	0.20319	0.06796	FALSE
2	Reaction	OPTIC NEURITIS	2	4942	2943	1.09475	0.27384	4.37658	0.70601	0.06796	FALSE
2	Reaction	ORAL HERPES	2	6549	2943	0.82604	0.20664	3.3021	1	0.06796	FALSE
2	Reaction	PAIN OF SKIN	2	5074	2943	1.06626	0.26672	4.26265	0.71254	0.06796	FALSE
2	Reaction	PALLOR	2	12130	2943	0.44592	0.11156	1.78238	0.34184	0.06796	FALSE
2	Reaction	PARANEOPLASTIC SYNDROME	2	381	2943	14.2694	3.5573	57.2384	0.00901	0.06796	TRUE
2	Reaction	PERCUTANEOUS CORONARY INTERVENTION	2	186	2943	29.3918	7.29904	118.355	0.00225	0.06796	TRUE
2	Reaction	PERICARDITIS	2	3796	2943	1.42543	0.35653	5.69904	0.40937	0.06796	FALSE
2	Reaction	PERIODONTITIS	2	1213	2943	4.4658	1.11611	17.8687	0.07495	0.06796	FALSE
2	Reaction	PERIPHERAL ISCHAEMIA	2	2051	2943	2.63938	0.65995	10.5558	0.17625	0.06796	FALSE
2	Reaction	PERITONITIS	2	12704	2943	0.42577	0.10652	1.70183	0.34713	0.06796	FALSE
2	Reaction	PHARYNGITIS	2	5743	2943	0.94201	0.23564	3.7658	1	0.06796	FALSE
2	Reaction	PITUITARY ENLARGEMENT	2	104	2943	53.0204	13.088	214.79	0.00071	0.06796	TRUE
2	Reaction	PLATELET COUNT INCREASED	2	5580	2943	0.96954	0.24253	3.87588	1	0.06796	FALSE
2	Reaction	PNEUMATOSIS INTESTINALIS	2	923	2943	5.87197	1.46701	23.5036	0.04648	0.06796	TRUE
2	Reaction	PNEUMOMEDIASTINUM	2	548	2943	9.90492	2.47202	39.6871	0.01792	0.06796	TRUE
2	Reaction	POLLAKIURIA	2	18845	2943	0.28701	0.07181	1.14716	0.05619	0.06796	FALSE
2	Reaction	PREGNANCY ON CONTRACEPTIVE	2	905	2943	5.98902	1.49621	23.9728	0.04488	0.06796	TRUE
2	Reaction	PRIMARY HYPOTHYROIDISM	2	59	2943	94.8787	23.1739	388.452	0.00023	0.06796	TRUE
2	Reaction	PRODUCT QUALITY ISSUE	2	81549	2943	0.06632	0.01659	0.26506	0	0.06796	TRUE
2	Reaction	PROTHROMBIN TIME PROLONGED	2	4943	2943	1.09453	0.27379	4.3757	0.70606	0.06796	FALSE
2	Reaction	PULMONARY FIBROSIS	2	7710	2943	0.70162	0.17552	2.80464	1	0.06796	FALSE
2	Reaction	PULMONARY THROMBOSIS	2	3928	2943	1.37751	0.34454	5.50736	0.66001	0.06796	FALSE
2	Reaction	PURPURA	2	4759	2943	1.13687	0.28437	4.545	0.69708	0.06796	FALSE
2	Reaction	PYELONEPHRITIS	2	3661	2943	1.47802	0.36967	5.90939	0.39203	0.06796	FALSE
2	Reaction	Probiotic therapy	2	26	2943	225.337	53.2783	953.048	4e-05	0.06796	TRUE
2	Reaction	Product preparation error	2	2772	2943	1.95238	0.48826	7.80689	0.27335	0.06796	FALSE
2	Reaction	Product use in unapproved indication	2	7439	2943	0.72719	0.18191	2.90686	1	0.06796	FALSE
2	Reaction	RASH ERYTHEMATOUS	2	17448	2943	0.30999	0.07756	1.23902	0.10831	0.06796	FALSE
2	Reaction	RASH MORBILLIFORM	2	1168	2943	4.63815	1.15913	18.5591	0.07023	0.06796	FALSE
2	Reaction	RED BLOOD CELL COUNT DECREASED	2	11980	2943	0.4515	0.11296	1.80471	0.34123	0.06796	FALSE
2	Reaction	RENAL CYST	2	4009	2943	1.34966	0.33758	5.39599	0.66324	0.06796	FALSE
2	Reaction	RENAL TUBULAR NECROSIS	2	4312	2943	1.25478	0.31386	5.01652	0.67619	0.06796	FALSE
2	Reaction	RESPIRATORY ARREST	2	18738	2943	0.28865	0.07222	1.15371	0.05611	0.06796	FALSE
2	Reaction	RESPIRATORY DEPRESSION	2	5368	2943	1.00784	0.25211	4.02904	0.72722	0.06796	FALSE
2	Reaction	SCIATICA	2	5501	2943	0.98347	0.24601	3.93157	1	0.06796	FALSE
2	Reaction	SERONEGATIVE ARTHRITIS	2	138	2943	39.7653	9.84911	160.551	0.00125	0.06796	TRUE
2	Reaction	SHOCK	2	11126	2943	0.48616	0.12163	1.94327	0.4544	0.06796	FALSE
2	Reaction	SINUS BRADYCARDIA	2	5015	2943	1.07881	0.26985	4.31283	0.70962	0.06796	FALSE
2	Reaction	SINUS DISORDER	2	7961	2943	0.67949	0.16999	2.71617	1	0.06796	FALSE
2	Reaction	SINUSITIS NONINFECTIVE	2	12	2943	540.809	118.544	2467.21	1e-05	0.06796	TRUE
2	Reaction	SKIN DEPIGMENTATION	2	570	2943	9.52128	2.37651	38.1462	0.01929	0.06796	TRUE
2	Reaction	SKIN HYPOPIGMENTATION	2	422	2943	12.8764	3.21119	51.6325	0.01095	0.06796	TRUE
2	Reaction	SKIN INFECTION	2	3850	2943	1.40543	0.35152	5.61904	0.65701	0.06796	FALSE
2	Reaction	SKIN TOXICITY	2	1630	2943	3.32192	0.83047	13.2879	0.12271	0.06796	FALSE
2	Reaction	SLEEP DISORDER	2	24756	2943	0.21847	0.05466	0.87321	0.01163	0.06796	TRUE
2	Reaction	SPINAL COMPRESSION FRACTURE	2	4026	2943	1.34396	0.33615	5.37319	0.66394	0.06796	FALSE
2	Reaction	SPINAL OSTEOARTHRITIS	2	5003	2943	1.0814	0.2705	4.32319	0.70902	0.06796	FALSE
2	Reaction	SPLENIC INFARCTION	2	870	2943	6.23051	1.55645	24.941	0.04182	0.06796	TRUE
2	Reaction	STRESS CARDIOMYOPATHY	2	1793	2943	3.01959	0.75494	12.0776	0.14296	0.06796	FALSE
2	Reaction	SUBDURAL HAEMATOMA	2	7004	2943	0.77236	0.19321	3.08748	1	0.06796	FALSE
2	Reaction	SUPERIOR VENA CAVA SYNDROME	2	256	2943	21.2917	5.29843	85.5603	0.00419	0.06796	TRUE
2	Reaction	SURFACTANT PROTEIN INCREASED	2	30	2943	193.146	46.0316	810.429	6e-05	0.06796	TRUE
2	Reaction	THROMBECTOMY	2	192	2943	28.4636	7.07021	114.59	0.00239	0.06796	TRUE
2	Reaction	THYROTOXIC CRISIS	2	322	2943	16.9003	4.21035	67.8374	0.00653	0.06796	TRUE
2	Reaction	TINNITUS	2	21112	2943	0.25619	0.0641	1.02395	0.02995	0.06796	TRUE
2	Reaction	TOXICITY TO VARIOUS AGENTS	2	45983	2943	0.11762	0.02943	0.47008	1e-05	0.06796	TRUE
2	Reaction	TRI-IODOTHYRONINE FREE INCREASED	2	52	2943	108.162	26.3301	444.318	0.00018	0.06796	TRUE
2	Reaction	ULCER	2	7406	2943	0.73043	0.18273	2.91981	1	0.06796	FALSE
2	Reaction	UPPER LIMB FRACTURE	2	9339	2943	0.57921	0.1449	2.31525	0.78267	0.06796	FALSE
2	Reaction	URINE OUTPUT DECREASED	2	4961	2943	1.09056	0.27279	4.35981	0.70695	0.06796	FALSE
2	Reaction	UROSEPSIS	2	3885	2943	1.39276	0.34836	5.56837	0.65835	0.06796	FALSE
2	Reaction	WEIGHT INCREASED	2	93623	2943	0.05777	0.01445	0.23087	0	0.06796	TRUE
2	Reaction	ABDOMINAL SEPSIS	1	413	2943	6.56321	0.9226	46.6897	0.14162	0.03398	FALSE
2	Reaction	ABDOMINAL TENDERNESS	1	2675	2943	1.01124	0.14244	7.17933	0.62814	0.03398	FALSE
2	Reaction	ABNORMAL BEHAVIOUR	1	25388	2943	0.10651	0.01501	0.75595	0.00158	0.03398	TRUE
2	Reaction	ABSCESS DRAINAGE	1	487	2943	5.56387	0.7824	39.5663	0.16479	0.03398	FALSE
2	Reaction	ACCIDENTAL OVERDOSE	1	14435	2943	0.18734	0.0264	1.32962	0.07592	0.03398	FALSE
2	Reaction	ACHROMOTRICHIA ACQUIRED	1	11	2943	270.404	34.6248	2111.74	0.00406	0.03398	TRUE
2	Reaction	ACIDOSIS	1	3983	2943	0.67907	0.09566	4.8205	1	0.03398	FALSE
2	Reaction	ACNE	1	13731	2943	0.19694	0.02775	1.3978	0.07232	0.03398	FALSE
2	Reaction	ACOUSTIC NEURITIS	1	16	2943	180.27	23.8193	1364.32	0.0059	0.03398	TRUE
2	Reaction	ACQUIRED EPIDERMOLYSIS BULLOSA	1	52	2943	53.0204	7.32934	383.55	0.01904	0.03398	TRUE
2	Reaction	ACTIVATED PARTIAL THROMBOPLASTIN TIME PROLONGED	1	3712	2943	0.72866	0.10264	5.17261	1	0.03398	FALSE
2	Reaction	ACUTE FEBRILE NEUTROPHILIC DERMATOSIS	1	924	2943	2.92962	0.41236	20.8135	0.28942	0.03398	FALSE
2	Reaction	ACUTE INTERSTITIAL PNEUMONITIS	1	175	2943	15.5405	2.17745	110.912	0.06266	0.03398	FALSE
2	Reaction	ACUTE MYOCARDIAL INFARCTION	1	18242	2943	0.14824	0.02089	1.05211	0.01853	0.03398	TRUE
2	Reaction	ADMINISTRATION SITE RASH	1	34	2943	81.9407	11.2105	598.929	0.01249	0.03398	TRUE
2	Reaction	ADRENAL HAEMORRHAGE	1	259	2943	10.4808	1.4712	74.6646	0.09132	0.03398	FALSE
2	Reaction	ADRENAL MASS	1	433	2943	6.25936	0.87998	44.5233	0.14795	0.03398	FALSE
2	Reaction	ADRENAL NEOPLASM	1	259	2943	10.4808	1.4712	74.6646	0.09132	0.03398	FALSE
2	Reaction	ADVERSE DRUG REACTION	1	24883	2943	0.10867	0.01531	0.77129	0.00235	0.03398	TRUE
2	Reaction	AGITATION	1	40742	2943	0.06637	0.00935	0.47105	1e-05	0.03398	TRUE
2	Reaction	ALANINE AMINOTRANSFERASE DECREASED	1	321	2943	8.45013	1.18703	60.1541	0.11192	0.03398	FALSE
2	Reaction	ALCOHOL INTERACTION	1	917	2943	2.95201	0.41551	20.9727	0.28757	0.03398	FALSE
2	Reaction	ALCOHOLISM	1	1695	2943	1.59625	0.22479	11.3351	0.4657	0.03398	FALSE
2	Reaction	ALOPECIA AREATA	1	382	2943	7.09723	0.99747	50.4984	0.13173	0.03398	FALSE
2	Reaction	ALVEOLITIS ALLERGIC	1	885	2943	3.05887	0.43053	21.7328	0.27909	0.03398	FALSE
2	Reaction	AMNESIA	1	33736	2943	0.08016	0.01129	0.56888	9e-05	0.03398	TRUE
2	Reaction	ANAL FISSURE	1	1490	2943	1.81601	0.25572	12.8967	0.42361	0.03398	FALSE
2	Reaction	ANAL HAEMORRHAGE	1	1210	2943	2.23659	0.31489	15.8859	0.36073	0.03398	FALSE
2	Reaction	ANKLE FRACTURE	1	7084	2943	0.38177	0.05379	2.70975	0.53162	0.03398	FALSE
2	Reaction	ANOXIA	1	292	2943	9.29224	1.30493	66.169	0.10234	0.03398	FALSE
2	Reaction	ANTIPHOSPHOLIPID SYNDROME	1	654	2943	4.14095	0.58261	29.4323	0.21481	0.03398	FALSE
2	Reaction	AORTITIS	1	132	2943	20.6415	2.88687	147.59	0.04764	0.03398	TRUE
2	Reaction	ARACHNOIDITIS	1	428	2943	6.33265	0.89026	45.0458	0.14637	0.03398	FALSE
2	Reaction	ARRHYTHMIA SUPRAVENTRICULAR	1	725	2943	3.73487	0.52555	26.5421	0.23515	0.03398	FALSE
2	Reaction	ARTERIAL THROMBOSIS	1	1170	2943	2.31313	0.32566	16.4299	0.3512	0.03398	FALSE
2	Reaction	ARTHRITIS BACTERIAL	1	1823	2943	1.48411	0.20901	10.5383	0.4904	0.03398	FALSE
2	Reaction	ARTHRITIS INFECTIVE	1	1913	2943	1.41425	0.19917	10.042	0.50708	0.03398	FALSE
2	Reaction	ASPIRATION PLEURAL CAVITY	1	414	2943	6.54732	0.92037	46.5764	0.14194	0.03398	FALSE
2	Reaction	ASTEATOSIS	1	36	2943	77.2584	10.5876	563.761	0.01322	0.03398	TRUE
2	Reaction	ASTERIXIS	1	642	2943	4.21848	0.5935	29.9842	0.21131	0.03398	FALSE
2	Reaction	ASTHENOPIA	1	2356	2943	1.14821	0.16172	8.15222	0.58157	0.03398	FALSE
2	Reaction	ATRIAL THROMBOSIS	1	1010	2943	2.67992	0.37725	19.0378	0.31166	0.03398	FALSE
2	Reaction	ATRIOVENTRICULAR BLOCK SECOND DEGREE	1	1695	2943	1.59625	0.22479	11.3351	0.4657	0.03398	FALSE
2	Reaction	ATROPHY	1	1193	2943	2.26849	0.31938	16.1126	0.3567	0.03398	FALSE
2	Reaction	ATYPICAL MYCOBACTERIAL INFECTION	1	456	2943	5.94295	0.83559	42.2678	0.15516	0.03398	FALSE
2	Reaction	AUTOIMMUNE INNER EAR DISEASE	1	11	2943	270.404	34.6248	2111.74	0.00406	0.03398	TRUE
2	Reaction	AUTONOMIC NEUROPATHY	1	444	2943	6.10393	0.85818	43.4153	0.1514	0.03398	FALSE
2	Reaction	AXILLARY MASS	1	504	2943	5.37583	0.75601	38.2264	0.17002	0.03398	FALSE
2	Reaction	Acute hepatitis B	1	105	2943	26.0004	3.62931	186.267	0.03808	0.03398	TRUE
2	Reaction	Adenocarcinoma gastric	1	252	2943	10.7731	1.51207	76.755	0.08897	0.03398	FALSE
2	Reaction	Anaplastic large-cell lymphoma	1	52	2943	53.0204	7.32934	383.55	0.01904	0.03398	TRUE
2	Reaction	Aphthous ulcer	1	1034	2943	2.61766	0.36849	18.5951	0.31774	0.03398	FALSE
2	Reaction	Atypical pneumonia	1	967	2943	2.79922	0.39402	19.8861	0.30063	0.03398	FALSE
2	Reaction	Autoimmune nephritis	1	16	2943	180.27	23.8193	1364.32	0.0059	0.03398	TRUE
2	Reaction	BACTERIAL INFECTION	1	7760	2943	0.3485	0.0491	2.47363	0.54279	0.03398	FALSE
2	Reaction	BENIGN PROSTATIC HYPERPLASIA	1	2960	2943	0.91384	0.12872	6.48761	1	0.03398	FALSE
2	Reaction	BILE DUCT OBSTRUCTION	1	1419	2943	1.90694	0.26851	13.5428	0.40828	0.03398	FALSE
2	Reaction	BILE DUCT STENOSIS	1	594	2943	4.55994	0.64146	32.4152	0.19719	0.03398	FALSE
2	Reaction	BILE DUCT STENT INSERTION	1	249	2943	10.9034	1.53029	77.6872	0.08796	0.03398	FALSE
2	Reaction	BILIARY CIRRHOSIS PRIMARY	1	370	2943	7.32803	1.02982	52.145	0.12786	0.03398	FALSE
2	Reaction	BILIRUBIN CONJUGATED INCREASED	1	1447	2943	1.87002	0.26332	13.2804	0.41437	0.03398	FALSE
2	Reaction	BIOPSY LIVER	1	268	2943	10.1275	1.4218	72.1386	0.09434	0.03398	FALSE
2	Reaction	BIOPSY SKIN	1	97	2943	28.1671	3.92868	201.947	0.03523	0.03398	TRUE
2	Reaction	BLADDER DYSFUNCTION	1	421	2943	6.4382	0.90506	45.7983	0.14416	0.03398	FALSE
2	Reaction	BLADDER IRRITATION	1	255	2943	10.6458	1.49428	75.8449	0.08998	0.03398	FALSE
2	Reaction	BLINDNESS UNILATERAL	1	6702	2943	0.40353	0.05685	2.86424	0.52932	0.03398	FALSE
2	Reaction	BLOOD ALKALINE PHOSPHATASE	1	118	2943	23.1115	3.22942	165.398	0.04269	0.03398	TRUE
2	Reaction	BLOOD ANTIDIURETIC HORMONE ABNORMAL	1	15	2943	193.146	25.4057	1468.38	0.00553	0.03398	TRUE
2	Reaction	BLOOD BILIRUBIN ABNORMAL	1	549	2943	4.93439	0.69404	35.0818	0.18372	0.03398	FALSE
2	Reaction	BLOOD CALCIUM DECREASED	1	5428	2943	0.49826	0.07019	3.53675	0.72919	0.03398	FALSE
2	Reaction	BLOOD CORTICOTROPHIN ABNORMAL	1	47	2943	58.7835	8.10922	426.121	0.01723	0.03398	TRUE
2	Reaction	BLOOD COUNT ABNORMAL	1	5904	2943	0.45808	0.06454	3.25151	0.73131	0.03398	FALSE
2	Reaction	BLOOD CREATININE ABNORMAL	1	1274	2943	2.12415	0.29907	15.0866	0.37568	0.03398	FALSE
2	Reaction	BLOOD DISORDER	1	3827	2943	0.70675	0.09956	5.0171	1	0.03398	FALSE
2	Reaction	BLOOD FIBRINOGEN DECREASED	1	450	2943	6.02237	0.84673	42.8339	0.15329	0.03398	FALSE
2	Reaction	BLOOD FIBRINOGEN INCREASED	1	598	2943	4.52939	0.63717	32.1977	0.19838	0.03398	FALSE
2	Reaction	BLOOD GLUCOSE FLUCTUATION	1	5945	2943	0.45492	0.06409	3.22908	0.73167	0.03398	FALSE
2	Reaction	BLOOD IMMUNOGLOBULIN G INCREASED	1	651	2943	4.16007	0.58529	29.5684	0.21394	0.03398	FALSE
2	Reaction	BLOOD INSULIN ABNORMAL	1	62	2943	44.3286	6.14697	319.673	0.02266	0.03398	TRUE
2	Reaction	BLOOD POTASSIUM INCREASED	1	8249	2943	0.32784	0.04619	2.32696	0.38467	0.03398	FALSE
2	Reaction	BLOOD PRESSURE SYSTOLIC INCREASED	1	6898	2943	0.39206	0.05524	2.78284	0.5301	0.03398	FALSE
2	Reaction	BLOOD PROLACTIN ABNORMAL	1	186	2943	14.6165	2.04867	104.283	0.06646	0.03398	FALSE
2	Reaction	BLOOD SODIUM ABNORMAL	1	389	2943	6.96918	0.97952	49.5851	0.13397	0.03398	FALSE
2	Reaction	BLOOD TESTOSTERONE DECREASED	1	4790	2943	0.56464	0.07954	4.00802	1	0.03398	FALSE
2	Reaction	BLOOD THYROID STIMULATING HORMONE	1	49	2943	56.3342	7.77817	408.007	0.01795	0.03398	TRUE
2	Reaction	BLOOD UREA INCREASED	1	11612	2943	0.23289	0.03281	1.65293	0.14248	0.03398	FALSE
2	Reaction	BODY TEMPERATURE	1	146	2943	18.6486	2.61001	133.244	0.05255	0.03398	FALSE
2	Reaction	BONE DISORDER	1	11361	2943	0.23803	0.03354	1.68945	0.14157	0.03398	FALSE
2	Reaction	BRACHIAL PLEXOPATHY	1	96	2943	28.4636	3.96962	204.095	0.03487	0.03398	TRUE
2	Reaction	BRAIN CANCER METASTATIC	1	216	2943	12.5769	1.76411	89.6655	0.07676	0.03398	FALSE
2	Reaction	BRAIN NATRIURETIC PEPTIDE INCREASED	1	1354	2943	1.99855	0.2814	14.1939	0.39388	0.03398	FALSE
2	Reaction	BRAIN NEOPLASM	1	3811	2943	0.70972	0.09998	5.03817	1	0.03398	FALSE
2	Reaction	BREAST PAIN	1	5514	2943	0.49048	0.0691	3.48157	0.72929	0.03398	FALSE
2	Reaction	BREATH ODOUR	1	1298	2943	2.08484	0.29354	14.8072	0.3812	0.03398	FALSE
2	Reaction	BRONCHOALVEOLAR LAVAGE	1	37	2943	75.1123	10.3014	547.68	0.01359	0.03398	TRUE
2	Reaction	BRONCHOPULMONARY ASPERGILLOSIS	1	2543	2943	1.06375	0.14983	7.55228	0.60954	0.03398	FALSE
2	Reaction	BRONCHOSPASM	1	7374	2943	0.36675	0.05167	2.60315	0.53539	0.03398	FALSE
2	Reaction	BURNING SENSATION	1	33341	2943	0.08111	0.01143	0.57562	0.00014	0.03398	TRUE
2	Reaction	BURSITIS	1	4717	2943	0.57338	0.08078	4.07008	1	0.03398	FALSE
2	Reaction	Body temperature abnormal	1	399	2943	6.79408	0.95497	48.3361	0.13717	0.03398	FALSE
2	Reaction	CAESAREAN SECTION	1	8826	2943	0.30641	0.04317	2.1748	0.39353	0.03398	FALSE
2	Reaction	CANDIDA SEPSIS	1	452	2943	5.99566	0.84299	42.6435	0.15391	0.03398	FALSE
2	Reaction	CARDIAC FAILURE ACUTE	1	2340	2943	1.15607	0.16283	8.20801	0.57909	0.03398	FALSE
2	Reaction	CARDIAC HYPERTROPHY	1	628	2943	4.31267	0.60673	30.6547	0.20722	0.03398	FALSE
2	Reaction	CARDIAC MURMUR	1	5864	2943	0.4612	0.06498	3.2737	0.73099	0.03398	FALSE
2	Reaction	CARDIOGENIC SHOCK	1	5331	2943	0.50733	0.07147	3.60113	1	0.03398	FALSE
2	Reaction	CARDIOPULMONARY FAILURE	1	2361	2943	1.14578	0.16138	8.13494	0.58235	0.03398	FALSE
2	Reaction	CARPAL TUNNEL DECOMPRESSION	1	544	2943	4.97982	0.70042	35.4054	0.18221	0.03398	FALSE
2	Reaction	CELL MARKER INCREASED	1	346	2943	7.83781	1.10126	55.7828	0.12009	0.03398	FALSE
2	Reaction	CENTRAL NERVOUS SYSTEM INFLAMMATION	1	174	2943	15.6303	2.18997	111.557	0.06231	0.03398	FALSE
2	Reaction	CENTRAL NERVOUS SYSTEM LESION	1	7548	2943	0.35829	0.05048	2.54313	0.53841	0.03398	FALSE
2	Reaction	CENTRAL VENOUS CATHETERISATION	1	1378	2943	1.96372	0.2765	13.9464	0.39924	0.03398	FALSE
2	Reaction	CEREBELLAR INFARCTION	1	995	2943	2.72037	0.38294	19.3254	0.30783	0.03398	FALSE
2	Reaction	CHOLANGITIS ACUTE	1	276	2943	9.83288	1.38058	70.0326	0.09702	0.03398	FALSE
2	Reaction	CHOLANGITIS SCLEROSING	1	520	2943	5.2101	0.73275	37.0458	0.17492	0.03398	FALSE
2	Reaction	CHOLECYSTECTOMY	1	7538	2943	0.35877	0.05055	2.5465	0.53822	0.03398	FALSE
2	Reaction	CHONDROCALCINOSIS	1	204	2943	13.3204	1.86789	94.9914	0.07265	0.03398	FALSE
2	Reaction	CHORIORETINITIS	1	154	2943	17.6735	2.47441	126.233	0.05535	0.03398	FALSE
2	Reaction	CHRONIC INFLAMMATORY DEMYELINATING POLYRADICULONEUROPATHY	1	325	2943	8.34581	1.17242	59.4092	0.11323	0.03398	FALSE
2	Reaction	CIRCULATORY COLLAPSE	1	9635	2943	0.28068	0.03954	1.99216	0.2798	0.03398	FALSE
2	Reaction	CIRCUMSTANCE OR INFORMATION CAPABLE OF LEADING TO MEDICATION ERROR	1	8064	2943	0.33536	0.04725	2.38036	0.38324	0.03398	FALSE
2	Reaction	COLECTOMY	1	2190	2943	1.23529	0.17398	8.77071	0.55508	0.03398	FALSE
2	Reaction	COLITIS ISCHAEMIC	1	3349	2943	0.80766	0.11377	5.73361	1	0.03398	FALSE
2	Reaction	COLONY STIMULATING FACTOR THERAPY	1	53	2943	52.0008	7.19102	376.036	0.01941	0.03398	TRUE
2	Reaction	COLOSTOMY	1	840	2943	3.22294	0.4536	22.8998	0.267	0.03398	FALSE
2	Reaction	COMA ACIDOTIC	1	32	2943	87.2272	11.9112	638.774	0.01176	0.03398	TRUE
2	Reaction	CONDUCTION DISORDER	1	985	2943	2.74801	0.38682	19.522	0.30526	0.03398	FALSE
2	Reaction	COOMBS TEST POSITIVE	1	221	2943	12.2911	1.72419	87.6186	0.07847	0.03398	FALSE
2	Reaction	COORDINATION ABNORMAL	1	9048	2943	0.29889	0.04211	2.12143	0.27544	0.03398	FALSE
2	Reaction	CRANIAL NERVE DISORDER	1	342	2943	7.92975	1.11414	56.439	0.11879	0.03398	FALSE
2	Reaction	CRANIAL NERVE PALSIES MULTIPLE	1	62	2943	44.3286	6.14697	319.673	0.02266	0.03398	TRUE
2	Reaction	CSF GRANULOCYTE COUNT ABNORMAL	1	9	2943	338.005	42.2871	2701.71	0.00332	0.03398	TRUE
2	Reaction	Cancer surgery	1	321	2943	8.45013	1.18703	60.1541	0.11192	0.03398	FALSE
2	Reaction	Cerebral ventricular rupture	1	59	2943	46.6214	6.45959	336.485	0.02158	0.03398	TRUE
2	Reaction	Chorioretinal folds	1	17	2943	169.003	22.4192	1274	0.00627	0.03398	TRUE
2	Reaction	Chronic kidney disease	1	4069	2943	0.66471	0.09364	4.71856	1	0.03398	FALSE
2	Reaction	Cytokine abnormal	1	6	2943	540.809	63.1996	4627.79	0.00222	0.03398	TRUE
2	Reaction	DEAFNESS	1	10435	2943	0.25916	0.03651	1.8394	0.19859	0.03398	FALSE
2	Reaction	DEAFNESS BILATERAL	1	735	2943	3.68398	0.5184	26.18	0.23798	0.03398	FALSE
2	Reaction	DECREASED ACTIVITY	1	3752	2943	0.72089	0.10155	5.11744	1	0.03398	FALSE
2	Reaction	DECUBITUS ULCER	1	4177	2943	0.64752	0.09122	4.5965	1	0.03398	FALSE
2	Reaction	DELUSION	1	6730	2943	0.40185	0.05661	2.85232	0.52938	0.03398	FALSE
2	Reaction	DEMYELINATING POLYNEUROPATHY	1	504	2943	5.37583	0.75601	38.2264	0.17002	0.03398	FALSE
2	Reaction	DEMYELINATION	1	2139	2943	1.26475	0.17813	8.98002	0.54661	0.03398	FALSE
2	Reaction	DENTAL CARE	1	563	2943	4.81146	0.67678	34.2064	0.18794	0.03398	FALSE
2	Reaction	DEPRESSED MOOD	1	21069	2943	0.12835	0.01808	0.91093	0.00642	0.03398	TRUE
2	Reaction	DEPRESSIVE SYMPTOM	1	1357	2943	1.99413	0.28078	14.1625	0.39455	0.03398	FALSE
2	Reaction	DERMAL CYST	1	1085	2943	2.4945	0.35117	17.7194	0.33049	0.03398	FALSE
2	Reaction	DERMATITIS ACNEIFORM	1	2526	2943	1.07091	0.15084	7.60315	0.60707	0.03398	FALSE
2	Reaction	DEVICE RELATED INFECTION	1	8072	2943	0.33503	0.0472	2.378	0.38328	0.03398	FALSE
2	Reaction	DEVICE RELATED SEPSIS	1	765	2943	3.53932	0.49807	25.1507	0.24638	0.03398	FALSE
2	Reaction	DILATATION VENTRICULAR	1	2134	2943	1.26772	0.17855	9.00108	0.54577	0.03398	FALSE
2	Reaction	DIVERTICULAR PERFORATION	1	1182	2943	2.28962	0.32235	16.2629	0.35408	0.03398	FALSE
2	Reaction	DIVERTICULITIS	1	10742	2943	0.25175	0.03547	1.78682	0.20103	0.03398	FALSE
2	Reaction	DRUG HYPERSENSITIVITY	1	63335	2943	0.04269	0.00602	0.30301	0	0.03398	TRUE
2	Reaction	DRUG INTOLERANCE	1	23056	2943	0.11729	0.01653	0.83241	0.00318	0.03398	TRUE
2	Reaction	DRUG PRESCRIBING ERROR	1	15356	2943	0.1761	0.02481	1.24987	0.05327	0.03398	FALSE
2	Reaction	DRUG RESISTANCE	1	6582	2943	0.41089	0.05789	2.91648	0.74011	0.03398	FALSE
2	Reaction	DYSLALIA	1	432	2943	6.27388	0.88202	44.6268	0.14763	0.03398	FALSE
2	Reaction	DYSTONIA	1	12625	2943	0.2142	0.03018	1.52028	0.10145	0.03398	FALSE
2	Reaction	Dropped head syndrome	1	92	2943	29.7148	4.14223	213.162	0.03344	0.03398	TRUE
2	Reaction	EAR INFECTION	1	9209	2943	0.29366	0.04137	2.08433	0.276	0.03398	FALSE
2	Reaction	EAR PAIN	1	8282	2943	0.32654	0.04601	2.31769	0.38501	0.03398	FALSE
2	Reaction	ECCHYMOSIS	1	3847	2943	0.70308	0.09904	4.991	1	0.03398	FALSE
2	Reaction	ECZEMA ASTEATOTIC	1	181	2943	15.0225	2.10527	107.195	0.06473	0.03398	FALSE
2	Reaction	EJACULATION FAILURE	1	1347	2943	2.00895	0.28287	14.2678	0.39231	0.03398	FALSE
2	Reaction	ELECTROCARDIOGRAM ABNORMAL	1	4493	2943	0.60197	0.0848	4.27308	1	0.03398	FALSE
2	Reaction	ELECTROCARDIOGRAM CHANGE	1	699	2943	3.87399	0.5451	27.5322	0.22776	0.03398	FALSE
2	Reaction	ELECTROCARDIOGRAM QT PROLONGED	1	13250	2943	0.20409	0.02876	1.44856	0.10531	0.03398	FALSE
2	Reaction	EMBOLISM VENOUS	1	1116	2943	2.42515	0.34142	17.2263	0.33812	0.03398	FALSE
2	Reaction	EMERGENCY CARE EXAMINATION	1	321	2943	8.45013	1.18703	60.1541	0.11192	0.03398	FALSE
2	Reaction	EMOTIONAL DISORDER	1	18423	2943	0.14678	0.02068	1.04177	0.01878	0.03398	TRUE
2	Reaction	EMPHYSEMA	1	5474	2943	0.49407	0.0696	3.50702	0.72923	0.03398	FALSE
2	Reaction	ENCEPHALITIS AUTOIMMUNE	1	146	2943	18.6486	2.61001	133.244	0.05255	0.03398	FALSE
2	Reaction	ENDOCARDITIS	1	2281	2943	1.18598	0.16704	8.4205	0.5698	0.03398	FALSE
2	Reaction	ENDOPHTHALMITIS	1	2110	2943	1.28214	0.18058	9.10356	0.54172	0.03398	FALSE
2	Reaction	ENDOSCOPIC RETROGRADE CHOLANGIOPANCREATOGRAPHY	1	79	2943	34.6672	4.82399	249.133	0.02879	0.03398	TRUE
2	Reaction	ENERGY INCREASED	1	2920	2943	0.92636	0.13049	6.57655	1	0.03398	FALSE
2	Reaction	ENTEROCOCCAL SEPSIS	1	434	2943	6.2449	0.87795	44.4202	0.14826	0.03398	FALSE
2	Reaction	ENTEROVIRUS TEST POSITIVE	1	44	2943	62.8847	8.66224	456.521	0.01614	0.03398	TRUE
2	Reaction	EPIDERMAL NECROSIS	1	406	2943	6.67665	0.9385	47.4987	0.1394	0.03398	FALSE
2	Reaction	EPSTEIN-BARR VIRUS TEST POSITIVE	1	372	2943	7.28853	1.02428	51.8631	0.12851	0.03398	FALSE
2	Reaction	ERUCTATION	1	7368	2943	0.36705	0.05171	2.60527	0.5353	0.03398	FALSE
2	Reaction	ERYTHEMA MULTIFORME	1	4804	2943	0.56299	0.07931	3.99634	1	0.03398	FALSE
2	Reaction	EXOSTOSIS	1	4471	2943	0.60493	0.08522	4.29412	1	0.03398	FALSE
2	Reaction	EYE INFECTION	1	3779	2943	0.71573	0.10082	5.08086	1	0.03398	FALSE
2	Reaction	EYE OPERATION	1	1331	2943	2.03312	0.28627	14.4396	0.38871	0.03398	FALSE
2	Reaction	EYE PRURITUS	1	9199	2943	0.29398	0.04142	2.0866	0.27595	0.03398	FALSE
2	Reaction	EYELID DISORDER	1	1109	2943	2.44047	0.34357	17.3353	0.3364	0.03398	FALSE
2	Reaction	EYELID OEDEMA	1	7661	2943	0.35301	0.04973	2.50561	0.54065	0.03398	FALSE
2	Reaction	FACIAL BONES FRACTURE	1	2011	2943	1.3453	0.18947	9.55217	0.52463	0.03398	FALSE
2	Reaction	FAECAL VOLUME DECREASED	1	152	2943	17.9076	2.50697	127.916	0.05465	0.03398	FALSE
2	Reaction	FAECALOMA	1	2258	2943	1.19807	0.16874	8.50635	0.56613	0.03398	FALSE
2	Reaction	FAECES DISCOLOURED	1	10718	2943	0.25231	0.03555	1.79082	0.20079	0.03398	FALSE
2	Reaction	FEAR OF DEATH	1	1166	2943	2.32107	0.32678	16.4864	0.35024	0.03398	FALSE
2	Reaction	FEEDING DISORDER	1	4310	2943	0.62753	0.0884	4.4546	1	0.03398	FALSE
2	Reaction	FEELING HOT	1	29298	2943	0.0923	0.013	0.65505	0.00038	0.03398	TRUE
2	Reaction	FEMALE GENITAL TRACT FISTULA	1	600	2943	4.51426	0.63504	32.09	0.19897	0.03398	FALSE
2	Reaction	FEMORAL NECK FRACTURE	1	2356	2943	1.14821	0.16172	8.15222	0.58157	0.03398	FALSE
2	Reaction	FEMUR FRACTURE	1	18902	2943	0.14306	0.02016	1.01537	0.01288	0.03398	TRUE
2	Reaction	FIBRIN DEGRADATION PRODUCTS	1	9	2943	338.005	42.2871	2701.71	0.00332	0.03398	TRUE
2	Reaction	FIBROMYALGIA	1	9416	2943	0.28721	0.04046	2.0385	0.27743	0.03398	FALSE
2	Reaction	FLANK PAIN	1	4485	2943	0.60304	0.08495	4.28071	1	0.03398	FALSE
2	Reaction	FLATULENCE	1	25020	2943	0.10808	0.01523	0.76707	0.00239	0.03398	TRUE
2	Reaction	FOOT OPERATION	1	1884	2943	1.43603	0.20224	10.1967	0.50177	0.03398	FALSE
2	Reaction	FRACTURED SACRUM	1	590	2943	4.59091	0.64581	32.6357	0.196	0.03398	FALSE
2	Reaction	FREQUENT BOWEL MOVEMENTS	1	7768	2943	0.34815	0.04905	2.47108	0.54297	0.03398	FALSE
2	Reaction	FUNGAEMIA	1	563	2943	4.81146	0.67678	34.2064	0.18794	0.03398	FALSE
2	Reaction	FUNGAL INFECTION	1	13918	2943	0.1943	0.02738	1.37902	0.07292	0.03398	FALSE
2	Reaction	FUNGAL OESOPHAGITIS	1	328	2943	8.26925	1.1617	58.8626	0.11421	0.03398	FALSE
2	Reaction	FUNGAL SEPSIS	1	414	2943	6.54732	0.92037	46.5764	0.14194	0.03398	FALSE
2	Reaction	FURUNCLE	1	3583	2943	0.7549	0.10634	5.35895	1	0.03398	FALSE
2	Reaction	GANGRENE	1	2800	2943	0.96607	0.13608	6.8586	1	0.03398	FALSE
2	Reaction	GASTRIC CANCER	1	2976	2943	0.90892	0.12803	6.45271	1	0.03398	FALSE
2	Reaction	GASTRIC ULCER	1	9789	2943	0.27626	0.03892	1.96081	0.28197	0.03398	FALSE
2	Reaction	GASTRITIS EROSIVE	1	2629	2943	1.02894	0.14493	7.30504	0.62176	0.03398	FALSE
2	Reaction	GASTRITIS HAEMORRHAGIC	1	807	2943	3.35489	0.47215	23.8385	0.258	0.03398	FALSE
2	Reaction	GASTROINTESTINAL INFLAMMATION	1	2625	2943	1.0305	0.14515	7.31618	0.6212	0.03398	FALSE
2	Reaction	GASTROINTESTINAL INJURY	1	1767	2943	1.53117	0.21563	10.8727	0.47974	0.03398	FALSE
2	Reaction	GASTROINTESTINAL MOTILITY DISORDER	1	1878	2943	1.44062	0.20289	10.2294	0.50066	0.03398	FALSE
2	Reaction	GASTROSTOMY	1	497	2943	5.4517	0.76666	38.767	0.16787	0.03398	FALSE
2	Reaction	GENERAL PHYSICAL CONDITION ABNORMAL	1	2454	2943	1.10234	0.15526	7.8264	0.59647	0.03398	FALSE
2	Reaction	GINGIVAL BLEEDING	1	5909	2943	0.45769	0.06448	3.24876	0.73136	0.03398	FALSE
2	Reaction	GINGIVAL PAIN	1	3975	2943	0.68043	0.09585	4.8302	1	0.03398	FALSE
2	Reaction	GLOMERULAR FILTRATION RATE	1	27	2943	104.002	14.1172	766.18	0.00993	0.03398	TRUE
2	Reaction	GLOMERULAR FILTRATION RATE DECREASED	1	3462	2943	0.78129	0.11006	5.54635	1	0.03398	FALSE
2	Reaction	GLOMERULONEPHRITIS	1	1112	2943	2.43388	0.34264	17.2884	0.33714	0.03398	FALSE
2	Reaction	GOUT	1	7783	2943	0.34747	0.04895	2.46632	0.54331	0.03398	FALSE
2	Reaction	GOUTY ARTHRITIS	1	460	2943	5.89116	0.82833	41.8987	0.15641	0.03398	FALSE
2	Reaction	GRAFT VERSUS HOST DISEASE	1	3618	2943	0.74759	0.10531	5.30708	1	0.03398	FALSE
2	Reaction	GRANULOCYTE COUNT INCREASED	1	144	2943	18.9094	2.64627	135.121	0.05185	0.03398	FALSE
2	Reaction	GRANULOMATOUS PNEUMONITIS	1	24	2943	117.567	15.8819	870.3	0.00883	0.03398	TRUE
2	Reaction	GRIP STRENGTH DECREASED	1	2297	2943	1.17772	0.16588	8.3618	0.57234	0.03398	FALSE
2	Reaction	GROIN PAIN	1	4190	2943	0.64551	0.09093	4.58224	1	0.03398	FALSE
2	Reaction	Gastrointestinal wall thickening	1	226	2943	12.018	1.68604	85.663	0.08017	0.03398	FALSE
2	Reaction	HAEMATOCRIT DECREASED	1	12336	2943	0.21922	0.03089	1.5559	0.10095	0.03398	FALSE
2	Reaction	HAEMATOCRIT INCREASED	1	817	2943	3.31378	0.46637	23.546	0.26074	0.03398	FALSE
2	Reaction	HAEMOGLOBIN INCREASED	1	1470	2943	1.84074	0.2592	13.0724	0.41933	0.03398	FALSE
2	Reaction	HAEMOGLOBINURIA	1	874	2943	3.09741	0.43595	22.0069	0.27615	0.03398	FALSE
2	Reaction	HAEMORRHOIDS	1	9523	2943	0.28398	0.04001	2.01559	0.27848	0.03398	FALSE
2	Reaction	HAEMOSTASIS	1	70	2943	39.189	5.44434	282.088	0.02555	0.03398	TRUE
2	Reaction	HAEMOTHORAX	1	1475	2943	1.83449	0.25832	13.028	0.42041	0.03398	FALSE
2	Reaction	HALLUCINATION, VISUAL	1	8552	2943	0.31623	0.04455	2.2445	0.38854	0.03398	FALSE
2	Reaction	HEAD INJURY	1	14248	2943	0.1898	0.02674	1.34708	0.07461	0.03398	FALSE
2	Reaction	HEART RATE DECREASED	1	13768	2943	0.19641	0.02767	1.39405	0.07242	0.03398	FALSE
2	Reaction	HEART RATE INCREASED	1	44877	2943	0.06026	0.00849	0.42764	0	0.03398	TRUE
2	Reaction	HEPARIN-INDUCED THROMBOCYTOPENIA	1	2867	2943	0.94349	0.1329	6.69821	1	0.03398	FALSE
2	Reaction	HEPATECTOMY	1	128	2943	21.2917	2.97709	152.275	0.04623	0.03398	TRUE
2	Reaction	HEPATIC ENZYME ABNORMAL	1	1976	2943	1.36914	0.19282	9.72153	0.51843	0.03398	FALSE
2	Reaction	HEPATIC RUPTURE	1	104	2943	26.2528	3.66422	188.093	0.03772	0.03398	TRUE
2	Reaction	HEPATITIS C	1	7004	2943	0.38613	0.0544	2.74071	0.53088	0.03398	FALSE
2	Reaction	HEPATITIS E	1	280	2943	9.69191	1.36086	69.025	0.09835	0.03398	FALSE
2	Reaction	HEPATITIS FULMINANT	1	1656	2943	1.63386	0.23008	11.6023	0.45793	0.03398	FALSE
2	Reaction	HEPATITIS INFECTIOUS	1	62	2943	44.3286	6.14697	319.673	0.02266	0.03398	TRUE
2	Reaction	HEPATITIS VIRAL	1	469	2943	5.77787	0.81243	41.0913	0.15921	0.03398	FALSE
2	Reaction	HEPATOMEGALY	1	5828	2943	0.46405	0.06538	3.29393	0.73073	0.03398	FALSE
2	Reaction	HERNIA REPAIR	1	1303	2943	2.07684	0.29242	14.7503	0.38234	0.03398	FALSE
2	Reaction	HERPES VIRUS INFECTION	1	2664	2943	1.01541	0.14302	7.209	0.62663	0.03398	FALSE
2	Reaction	HIATUS HERNIA	1	7077	2943	0.38214	0.05384	2.71243	0.53155	0.03398	FALSE
2	Reaction	HIP ARTHROPLASTY	1	5514	2943	0.49048	0.0691	3.48157	0.72929	0.03398	FALSE
2	Reaction	HUMAN RHINOVIRUS TEST POSITIVE	1	66	2943	41.6007	5.77436	299.707	0.02411	0.03398	TRUE
2	Reaction	HYDROCHOLECYSTIS	1	96	2943	28.4636	3.96962	204.095	0.03487	0.03398	TRUE
2	Reaction	HYPERAESTHESIA	1	4362	2943	0.62005	0.08735	4.40147	1	0.03398	FALSE
2	Reaction	HYPERCOAGULATION	1	1304	2943	2.07524	0.29219	14.739	0.38257	0.03398	FALSE
2	Reaction	HYPERCREATININAEMIA	1	220	2943	12.3472	1.73203	88.0204	0.07813	0.03398	FALSE
2	Reaction	HYPEREOSINOPHILIC SYNDROME	1	155	2943	17.5587	2.45845	125.408	0.0557	0.03398	FALSE
2	Reaction	HYPERLACTACIDAEMIA	1	807	2943	3.35489	0.47215	23.8385	0.258	0.03398	FALSE
2	Reaction	HYPERPITUITARISM	1	16	2943	180.27	23.8193	1364.32	0.0059	0.03398	TRUE
2	Reaction	HYPERPROLACTINAEMIA	1	4602	2943	0.58771	0.08279	4.17183	1	0.03398	FALSE
2	Reaction	HYPERTENSIVE CRISIS	1	4907	2943	0.55117	0.07765	3.91242	1	0.03398	FALSE
2	Reaction	HYPERTENSIVE EMERGENCY	1	446	2943	6.0765	0.85433	43.2197	0.15203	0.03398	FALSE
2	Reaction	HYPERTHERMIA	1	3641	2943	0.74287	0.10465	5.27353	1	0.03398	FALSE
2	Reaction	HYPERTRANSAMINASAEMIA	1	710	2943	3.81388	0.53665	27.1044	0.2309	0.03398	FALSE
2	Reaction	HYPOGAMMAGLOBULINAEMIA	1	1390	2943	1.94676	0.27411	13.8258	0.4019	0.03398	FALSE
2	Reaction	HYPOGONADISM MALE	1	135	2943	20.1794	2.82271	144.262	0.04869	0.03398	TRUE
2	Reaction	HYPOKINESIA	1	6137	2943	0.44068	0.06208	3.12802	0.73365	0.03398	FALSE
2	Reaction	HYPOPHAGIA	1	10597	2943	0.25519	0.03595	1.81127	0.1997	0.03398	FALSE
2	Reaction	HYPOPNOEA	1	1298	2943	2.08484	0.29354	14.8072	0.3812	0.03398	FALSE
2	Reaction	HYPOVOLAEMIC SHOCK	1	1999	2943	1.35337	0.1906	9.60956	0.52251	0.03398	FALSE
2	Reaction	Hepatic hypertrophy	1	8	2943	386.292	47.5403	3138.84	0.00295	0.03398	TRUE
2	Reaction	Hernia perforation	1	26	2943	108.162	14.6602	798.006	0.00957	0.03398	TRUE
2	Reaction	Hypercapnic coma	1	37	2943	75.1123	10.3014	547.68	0.01359	0.03398	TRUE
2	Reaction	ILEOSTOMY	1	858	2943	3.15524	0.44408	22.4183	0.27186	0.03398	FALSE
2	Reaction	IMMUNISATION REACTION	1	40	2943	69.3344	9.52864	504.507	0.01468	0.03398	TRUE
2	Reaction	IMMUNODEFICIENCY	1	3188	2943	0.84846	0.11952	6.02334	1	0.03398	FALSE
2	Reaction	IMMUNOGLOBULINS DECREASED	1	287	2943	9.4547	1.32766	67.3298	0.10068	0.03398	FALSE
2	Reaction	IMPAIRED HEALING	1	14918	2943	0.18127	0.02554	1.28657	0.05165	0.03398	FALSE
2	Reaction	INCOHERENT	1	3989	2943	0.67804	0.09552	4.81324	1	0.03398	FALSE
2	Reaction	INCORRECT DRUG ADMINISTRATION DURATION	1	23699	2943	0.1141	0.01608	0.80983	0.00329	0.03398	TRUE
2	Reaction	INCORRECT PRODUCT STORAGE	1	13507	2943	0.20021	0.02821	1.42099	0.07195	0.03398	FALSE
2	Reaction	INCREASED UPPER AIRWAY SECRETION	1	3993	2943	0.67737	0.09542	4.80842	1	0.03398	FALSE
2	Reaction	INFERIOR VENA CAVAL OCCLUSION	1	77	2943	35.5795	4.94931	255.773	0.02807	0.03398	TRUE
2	Reaction	INFLAMMATORY BOWEL DISEASE	1	6412	2943	0.42178	0.05942	2.99383	0.73736	0.03398	FALSE
2	Reaction	INFUSION SITE EXTRAVASATION	1	1849	2943	1.46323	0.20607	10.39	0.49528	0.03398	FALSE
2	Reaction	INGUINAL HERNIA REPAIR	1	237	2943	11.4578	1.60778	81.6537	0.0839	0.03398	FALSE
2	Reaction	INJECTION SITE HAEMATOMA	1	13050	2943	0.20722	0.0292	1.47076	0.10367	0.03398	FALSE
2	Reaction	INTERLEUKIN LEVEL INCREASED	1	104	2943	26.2528	3.66422	188.093	0.03772	0.03398	TRUE
2	Reaction	INTESTINAL ISCHAEMIA	1	2770	2943	0.97654	0.13755	6.93293	1	0.03398	FALSE
2	Reaction	INTESTINAL RESECTION	1	2019	2943	1.33996	0.18872	9.51428	0.52603	0.03398	FALSE
2	Reaction	IRITIS	1	1418	2943	1.90829	0.2687	13.5524	0.40806	0.03398	FALSE
2	Reaction	IRON DEFICIENCY ANAEMIA	1	4358	2943	0.62062	0.08743	4.40551	1	0.03398	FALSE
2	Reaction	ISCHAEMIA	1	2993	2943	0.90376	0.1273	6.41604	1	0.03398	FALSE
2	Reaction	ISCHAEMIC CARDIOMYOPATHY	1	2357	2943	1.14773	0.16165	8.14876	0.58173	0.03398	FALSE
2	Reaction	ISCHAEMIC NEUROPATHY	1	43	2943	64.382	8.86372	467.641	0.01577	0.03398	TRUE
2	Reaction	Incarcerated umbilical hernia	1	34	2943	81.9407	11.2105	598.929	0.01249	0.03398	TRUE
2	Reaction	Intestinal sepsis	1	29	2943	96.573	13.1436	709.574	0.01067	0.03398	TRUE
2	Reaction	JEJUNOSTOMY	1	83	2943	32.9761	4.59147	236.836	0.03022	0.03398	TRUE
2	Reaction	JOINT EFFUSION	1	3204	2943	0.84422	0.11892	5.99325	1	0.03398	FALSE
2	Reaction	JOINT INJURY	1	9475	2943	0.28542	0.04021	2.02581	0.27799	0.03398	FALSE
2	Reaction	JOINT STIFFNESS	1	11088	2943	0.24389	0.03436	1.73105	0.20546	0.03398	FALSE
2	Reaction	KAPOSI'S VARICELLIFORM ERUPTION	1	63	2943	43.6136	6.04938	314.436	0.02303	0.03398	TRUE
2	Reaction	KERATITIS	1	1208	2943	2.2403	0.31541	15.9122	0.36026	0.03398	FALSE
2	Reaction	KERATOACANTHOMA	1	288	2943	9.42175	1.32305	67.0944	0.10102	0.03398	FALSE
2	Reaction	KLEBSIELLA BACTERAEMIA	1	280	2943	9.69191	1.36086	69.025	0.09835	0.03398	FALSE
2	Reaction	LACUNAR INFARCTION	1	1783	2943	1.51742	0.2137	10.775	0.4828	0.03398	FALSE
2	Reaction	LARGE INTESTINE OPERATION	1	53	2943	52.0008	7.19102	376.036	0.01941	0.03398	TRUE
2	Reaction	LARYNGEAL PAIN	1	131	2943	20.8003	2.90891	148.734	0.04728	0.03398	TRUE
2	Reaction	LARYNGITIS	1	4644	2943	0.58239	0.08204	4.13408	1	0.03398	FALSE
2	Reaction	LATENT AUTOIMMUNE DIABETES IN ADULTS	1	49	2943	56.3342	7.77817	408.007	0.01795	0.03398	TRUE
2	Reaction	LEG AMPUTATION	1	2043	2943	1.32421	0.1865	9.4024	0.53022	0.03398	FALSE
2	Reaction	LEUKOENCEPHALOPATHY	1	1984	2943	1.36361	0.19205	9.68229	0.51986	0.03398	FALSE
2	Reaction	LIMB REDUCTION DEFECT	1	351	2943	7.72584	1.08557	54.9836	0.12172	0.03398	FALSE
2	Reaction	LIPASE ABNORMAL	1	102	2943	26.7727	3.73607	191.853	0.03701	0.03398	TRUE
2	Reaction	LIQUID PRODUCT PHYSICAL ISSUE	1	824	2943	3.28559	0.46241	23.3455	0.26265	0.03398	FALSE
2	Reaction	LISTLESS	1	1632	2943	1.65791	0.23347	11.7732	0.4531	0.03398	FALSE
2	Reaction	LITHOTRIPSY	1	100	2943	27.3136	3.81081	195.767	0.0363	0.03398	TRUE
2	Reaction	LIVER FUNCTION TEST	1	50	2943	55.1846	7.62257	399.515	0.01832	0.03398	TRUE
2	Reaction	LIVER OPERATION	1	132	2943	20.6415	2.88687	147.59	0.04764	0.03398	TRUE
2	Reaction	LOBAR PNEUMONIA	1	2140	2943	1.26416	0.17805	8.97582	0.54678	0.03398	FALSE
2	Reaction	LUNG NEOPLASM	1	3472	2943	0.77904	0.10974	5.53037	1	0.03398	FALSE
2	Reaction	LYMPHADENOPATHY MEDIASTINAL	1	835	2943	3.24226	0.45632	23.0372	0.26564	0.03398	FALSE
2	Reaction	LYMPHANGIOSIS CARCINOMATOSA	1	483	2943	5.61005	0.78888	39.8953	0.16355	0.03398	FALSE
2	Reaction	LYMPHOMA	1	7066	2943	0.38274	0.05392	2.71665	0.53144	0.03398	FALSE
2	Reaction	LYMPHOPROLIFERATIVE DISORDER	1	1082	2943	2.50143	0.35215	17.7686	0.32974	0.03398	FALSE
2	Reaction	LYMPHORRHOEA	1	60	2943	45.8312	6.35191	330.688	0.02194	0.03398	TRUE
2	Reaction	Limb mass	1	250	2943	10.8596	1.52417	77.3739	0.08829	0.03398	FALSE
2	Reaction	Limbic encephalitis	1	38	2943	73.0823	10.0302	532.491	0.01395	0.03398	TRUE
2	Reaction	Loss of personal independence in daily activities	1	853	2943	3.17376	0.44669	22.55	0.27051	0.03398	FALSE
2	Reaction	MACROANGIOPATHY	1	24	2943	117.567	15.8819	870.3	0.00883	0.03398	TRUE
2	Reaction	MACULAR DEGENERATION	1	4809	2943	0.5624	0.07923	3.99218	1	0.03398	FALSE
2	Reaction	MACULAR OEDEMA	1	2625	2943	1.0305	0.14515	7.31618	0.6212	0.03398	FALSE
2	Reaction	MALIGNANT ASCITES	1	385	2943	7.04178	0.9897	50.1029	0.13269	0.03398	FALSE
2	Reaction	MALIGNANT MELANOMA STAGE IV	1	69	2943	39.7653	5.52325	286.295	0.02519	0.03398	TRUE
2	Reaction	MALIGNANT PLEURAL EFFUSION	1	795	2943	3.4056	0.47927	24.1992	0.2547	0.03398	FALSE
2	Reaction	MARASMUS	1	385	2943	7.04178	0.9897	50.1029	0.13269	0.03398	FALSE
2	Reaction	MECHANICAL ILEUS	1	157	2943	17.3336	2.42713	123.79	0.0564	0.03398	FALSE
2	Reaction	MECHANICAL VENTILATION	1	1160	2943	2.33308	0.32847	16.5718	0.3488	0.03398	FALSE
2	Reaction	MEDICAL DEVICE DISCOMFORT	1	2001	2943	1.35202	0.19041	9.59995	0.52287	0.03398	FALSE
2	Reaction	MEDICATION ERROR	1	33118	2943	0.08165	0.0115	0.57949	0.00014	0.03398	TRUE
2	Reaction	MELAENA	1	10764	2943	0.25124	0.0354	1.78317	0.20126	0.03398	FALSE
2	Reaction	MELANOCYTIC NAEVUS	1	1791	2943	1.51064	0.21274	10.7268	0.48433	0.03398	FALSE
2	Reaction	MELANOSIS	1	60	2943	45.8312	6.35191	330.688	0.02194	0.03398	TRUE
2	Reaction	MEMORY IMPAIRMENT	1	56611	2943	0.04777	0.00673	0.339	0	0.03398	TRUE
2	Reaction	MENINGEAL DISORDER	1	283	2943	9.58881	1.34643	68.2881	0.09935	0.03398	FALSE
2	Reaction	MENINGIOMA	1	1289	2943	2.09941	0.29559	14.9108	0.37914	0.03398	FALSE
2	Reaction	MENINGISM	1	251	2943	10.8162	1.5181	77.0632	0.08863	0.03398	FALSE
2	Reaction	MENINGITIS NONINFECTIVE	1	23	2943	122.911	16.5724	911.586	0.00847	0.03398	TRUE
2	Reaction	MENINGITIS VIRAL	1	738	2943	3.66899	0.51629	26.0733	0.23882	0.03398	FALSE
2	Reaction	MENTAL DISORDER	1	19371	2943	0.1396	0.01967	0.99078	0.01316	0.03398	TRUE
2	Reaction	MENTAL IMPAIRMENT	1	11589	2943	0.23335	0.03288	1.65621	0.14237	0.03398	FALSE
2	Reaction	METABOLIC DISORDER	1	2989	2943	0.90497	0.12747	6.42463	1	0.03398	FALSE
2	Reaction	METASTASES TO BLADDER	1	106	2943	25.7528	3.59507	184.477	0.03844	0.03398	TRUE
2	Reaction	METASTASES TO SKIN	1	318	2943	8.5301	1.19823	60.7252	0.11093	0.03398	FALSE
2	Reaction	METASTATIC LYMPHOMA	1	116	2943	23.5134	3.28511	168.299	0.04198	0.03398	TRUE
2	Reaction	MIGRAINE	1	34443	2943	0.07851	0.01106	0.5572	0.0001	0.03398	TRUE
2	Reaction	MILLER FISHER SYNDROME	1	100	2943	27.3136	3.81081	195.767	0.0363	0.03398	TRUE
2	Reaction	MITOCHONDRIAL CYTOPATHY	1	238	2943	11.4095	1.60103	81.3078	0.08424	0.03398	FALSE
2	Reaction	MITRAL VALVE INCOMPETENCE	1	7069	2943	0.38258	0.0539	2.7155	0.53147	0.03398	FALSE
2	Reaction	MIXED LIVER INJURY	1	437	2943	6.20193	0.87192	44.1139	0.14921	0.03398	FALSE
2	Reaction	MONOCYTE COUNT INCREASED	1	1243	2943	2.17717	0.30653	15.4635	0.36848	0.03398	FALSE
2	Reaction	MONONEUROPATHY MULTIPLEX	1	209	2943	13.0002	1.8232	92.6972	0.07437	0.03398	FALSE
2	Reaction	MONOPARESIS	1	891	2943	3.03825	0.42763	21.5861	0.28069	0.03398	FALSE
2	Reaction	MOOD SWINGS	1	17604	2943	0.15361	0.02164	1.09024	0.02717	0.03398	TRUE
2	Reaction	MOTOR DYSFUNCTION	1	4482	2943	0.60345	0.08501	4.28357	1	0.03398	FALSE
2	Reaction	MUCOSAL INFECTION	1	109	2943	25.0374	3.49611	179.306	0.0395	0.03398	TRUE
2	Reaction	MULTI-ORGAN DISORDER	1	1357	2943	1.99413	0.28078	14.1625	0.39455	0.03398	FALSE
2	Reaction	MULTIPLE FRACTURES	1	3731	2943	0.72494	0.10212	5.14626	1	0.03398	FALSE
2	Reaction	MUSCLE ATROPHY	1	5529	2943	0.48915	0.06891	3.47212	0.72932	0.03398	FALSE
2	Reaction	MUSCLE HAEMORRHAGE	1	2058	2943	1.31456	0.18514	9.33381	0.53282	0.03398	FALSE
2	Reaction	MUSCLE NECROSIS	1	495	2943	5.47377	0.76976	38.9243	0.16726	0.03398	FALSE
2	Reaction	MUSCLE RIGIDITY	1	5416	2943	0.49936	0.07035	3.54459	0.72919	0.03398	FALSE
2	Reaction	MUSCLE TWITCHING	1	11582	2943	0.23349	0.0329	1.65721	0.14233	0.03398	FALSE
2	Reaction	MUSCULOSKELETAL CHEST PAIN	1	6998	2943	0.38646	0.05445	2.74306	0.53083	0.03398	FALSE
2	Reaction	MYELITIS TRANSVERSE	1	599	2943	4.52181	0.6361	32.1437	0.19867	0.03398	FALSE
2	Reaction	MYELOPATHY	1	727	2943	3.72458	0.52411	26.4689	0.23572	0.03398	FALSE
2	Reaction	MYOCARDIAL ISCHAEMIA	1	8542	2943	0.3166	0.0446	2.24713	0.38838	0.03398	FALSE
2	Reaction	MYXOEDEMA COMA	1	106	2943	25.7528	3.59507	184.477	0.03844	0.03398	TRUE
2	Reaction	Meningoencephalitis viral	1	24	2943	117.567	15.8819	870.3	0.00883	0.03398	TRUE
2	Reaction	Myocardial necrosis marker increased	1	356	2943	7.61702	1.07032	54.2071	0.12334	0.03398	FALSE
2	Reaction	NARCOLEPSY	1	817	2943	3.31378	0.46637	23.546	0.26074	0.03398	FALSE
2	Reaction	NASAL DRYNESS	1	2721	2943	0.99413	0.14003	7.05787	1	0.03398	FALSE
2	Reaction	NECROSIS	1	3180	2943	0.8506	0.11982	6.03851	1	0.03398	FALSE
2	Reaction	NECROTISING FASCIITIS	1	1331	2943	2.03312	0.28627	14.4396	0.38871	0.03398	FALSE
2	Reaction	NEPHROLITHIASIS	1	17357	2943	0.1558	0.02195	1.10576	0.02652	0.03398	TRUE
2	Reaction	NEPHROPATHY TOXIC	1	4061	2943	0.66602	0.09382	4.72786	1	0.03398	FALSE
2	Reaction	NEPHROSTOMY	1	99	2943	27.5923	3.84931	197.785	0.03594	0.03398	TRUE
2	Reaction	NEURITIS	1	750	2943	3.6102	0.50803	25.655	0.24219	0.03398	FALSE
2	Reaction	NEURODERMATITIS	1	365	2943	7.42869	1.04393	52.8632	0.12625	0.03398	FALSE
2	Reaction	NEUROLOGICAL DECOMPENSATION	1	910	2943	2.97474	0.41871	21.1344	0.28573	0.03398	FALSE
2	Reaction	NEUROLYSIS	1	16	2943	180.27	23.8193	1364.32	0.0059	0.03398	TRUE
2	Reaction	NEUROSURGERY	1	70	2943	39.189	5.44434	282.088	0.02555	0.03398	TRUE
2	Reaction	NEUTROPHIL COUNT	1	109	2943	25.0374	3.49611	179.306	0.0395	0.03398	TRUE
2	Reaction	NIGHTMARE	1	18234	2943	0.1483	0.0209	1.05257	0.01852	0.03398	TRUE
2	Reaction	NO THERAPEUTIC RESPONSE	1	13302	2943	0.2033	0.02864	1.44289	0.1058	0.03398	FALSE
2	Reaction	NONSPECIFIC REACTION	1	2173	2943	1.24496	0.17534	8.83939	0.55227	0.03398	FALSE
2	Reaction	NUCHAL RIGIDITY	1	459	2943	5.90402	0.83013	41.9904	0.1561	0.03398	FALSE
2	Reaction	Necrotising myositis	1	57	2943	48.2865	6.68629	348.711	0.02086	0.03398	TRUE
2	Reaction	Nodular melanoma	1	31	2943	90.1348	12.2955	660.751	0.0114	0.03398	TRUE
2	Reaction	OBSTRUCTION GASTRIC	1	487	2943	5.56387	0.7824	39.5663	0.16479	0.03398	FALSE
2	Reaction	OBSTRUCTIVE UROPATHY	1	434	2943	6.2449	0.87795	44.4202	0.14826	0.03398	FALSE
2	Reaction	OCULAR DISCOMFORT	1	2256	2943	1.19913	0.16889	8.5139	0.56581	0.03398	FALSE
2	Reaction	OCULAR HYPERTENSION	1	568	2943	4.76904	0.67082	33.9042	0.18944	0.03398	FALSE
2	Reaction	OCULAR ICTERUS	1	2468	2943	1.09609	0.15438	7.78197	0.59855	0.03398	FALSE
2	Reaction	OCULAR MYASTHENIA	1	114	2943	23.9296	3.34275	171.304	0.04128	0.03398	TRUE
2	Reaction	OESOPHAGEAL CANDIDIASIS	1	1688	2943	1.60287	0.22572	11.3821	0.46431	0.03398	FALSE
2	Reaction	OESOPHAGEAL STENOSIS	1	1349	2943	2.00597	0.28245	14.2466	0.39276	0.03398	FALSE
2	Reaction	OESOPHAGECTOMY	1	32	2943	87.2272	11.9112	638.774	0.01176	0.03398	TRUE
2	Reaction	OPTIC ISCHAEMIC NEUROPATHY	1	1556	2943	1.73893	0.24487	12.3489	0.43751	0.03398	FALSE
2	Reaction	OPTIC NEUROPATHY	1	882	2943	3.06929	0.432	21.8069	0.27829	0.03398	FALSE
2	Reaction	ORAL DISORDER	1	3411	2943	0.79297	0.1117	5.62933	1	0.03398	FALSE
2	Reaction	ORCHITIS	1	445	2943	6.09019	0.85625	43.3173	0.15172	0.03398	FALSE
2	Reaction	OROPHARYNGEAL DISCOMFORT	1	1596	2943	1.69532	0.23873	12.039	0.44577	0.03398	FALSE
2	Reaction	ORTHOSTATIC HYPOTENSION	1	7516	2943	0.35982	0.05069	2.55396	0.53781	0.03398	FALSE
2	Reaction	OSTEOCHONDROSIS	1	522	2943	5.1901	0.72994	36.9033	0.17553	0.03398	FALSE
2	Reaction	OSTEOSYNTHESIS	1	126	2943	21.6323	3.02435	154.73	0.04552	0.03398	TRUE
2	Reaction	OTITIS MEDIA	1	1715	2943	1.57762	0.22217	11.2027	0.46963	0.03398	FALSE
2	Reaction	OTITIS MEDIA CHRONIC	1	232	2943	11.7058	1.64244	83.4286	0.08221	0.03398	FALSE
2	Reaction	OVARIAN CANCER	1	3559	2943	0.75999	0.10706	5.3951	1	0.03398	FALSE
2	Reaction	OVERDOSE	1	64504	2943	0.04192	0.00591	0.29752	0	0.03398	TRUE
2	Reaction	Oesophageal motility disorder	1	93	2943	29.3918	4.09769	210.82	0.0338	0.03398	TRUE
2	Reaction	PAIN IN JAW	1	12982	2943	0.20831	0.02935	1.47846	0.1032	0.03398	FALSE
2	Reaction	PAINFUL RESPIRATION	1	1282	2943	2.11088	0.29721	14.9923	0.37753	0.03398	FALSE
2	Reaction	PALATAL OEDEMA	1	569	2943	4.76064	0.66964	33.8444	0.18974	0.03398	FALSE
2	Reaction	PANCREATIC CARCINOMA	1	6924	2943	0.39059	0.05503	2.77238	0.53027	0.03398	FALSE
2	Reaction	PANCREATIC DISORDER	1	2123	2943	1.27429	0.17947	9.04777	0.54392	0.03398	FALSE
2	Reaction	PANCREATIC INSUFFICIENCY	1	403	2943	6.72648	0.94549	47.854	0.13844	0.03398	FALSE
2	Reaction	PANCREATITIS RELAPSING	1	398	2943	6.81119	0.95737	48.4582	0.13685	0.03398	FALSE
2	Reaction	PARADOXICAL EMBOLISM	1	52	2943	53.0204	7.32934	383.55	0.01904	0.03398	TRUE
2	Reaction	PARAESTHESIA ORAL	1	6152	2943	0.43961	0.06193	3.1204	0.73383	0.03398	FALSE
2	Reaction	PARANEOPLASTIC RETINOPATHY	1	5	2943	676.011	75.5776	6046.64	0.00185	0.03398	TRUE
2	Reaction	PARAPARESIS	1	874	2943	3.09741	0.43595	22.0069	0.27615	0.03398	FALSE
2	Reaction	PARAPROTEINAEMIA	1	165	2943	16.4881	2.30943	117.716	0.05919	0.03398	FALSE
2	Reaction	PARASITE STOOL TEST POSITIVE	1	25	2943	112.668	15.2466	832.589	0.0092	0.03398	TRUE
2	Reaction	PARKINSON'S DISEASE	1	6190	2943	0.43691	0.06155	3.10123	0.73429	0.03398	FALSE
2	Reaction	PARVOVIRUS INFECTION	1	199	2943	13.6568	1.91482	97.4021	0.07094	0.03398	FALSE
2	Reaction	PELVIC PAIN	1	10291	2943	0.26278	0.03702	1.86514	0.19794	0.03398	FALSE
2	Reaction	PELVIC VENOUS THROMBOSIS	1	931	2943	2.90757	0.40926	20.6567	0.29125	0.03398	FALSE
2	Reaction	PERFORMANCE STATUS DECREASED	1	2622	2943	1.03168	0.14532	7.32456	0.62078	0.03398	FALSE
2	Reaction	PERIPHERAL COLDNESS	1	6485	2943	0.41703	0.05875	2.96012	0.7385	0.03398	FALSE
2	Reaction	PERIPHERAL SENSORIMOTOR NEUROPATHY	1	462	2943	5.8656	0.82474	41.7165	0.15703	0.03398	FALSE
2	Reaction	PERIPHERAL VASCULAR DISORDER	1	3454	2943	0.7831	0.11031	5.55921	1	0.03398	FALSE
2	Reaction	PERONEAL NERVE PALSY	1	2989	2943	0.90497	0.12747	6.42463	1	0.03398	FALSE
2	Reaction	PETIT MAL EPILEPSY	1	2435	2943	1.11095	0.15648	7.88752	0.59362	0.03398	FALSE
2	Reaction	PHARYNGEAL HAEMORRHAGE	1	547	2943	4.95246	0.69658	35.2105	0.18312	0.03398	FALSE
2	Reaction	PHARYNGEAL INFLAMMATION	1	450	2943	6.02237	0.84673	42.8339	0.15329	0.03398	FALSE
2	Reaction	PHARYNGEAL OEDEMA	1	12062	2943	0.2242	0.03159	1.59125	0.14607	0.03398	FALSE
2	Reaction	PHARYNGOTONSILLITIS	1	92	2943	29.7148	4.14223	213.162	0.03344	0.03398	TRUE
2	Reaction	PHOTOPHOBIA	1	7574	2943	0.35706	0.05031	2.5344	0.53891	0.03398	FALSE
2	Reaction	PHOTOSENSITIVITY REACTION	1	7067	2943	0.38268	0.05391	2.71627	0.53145	0.03398	FALSE
2	Reaction	PLATELET COUNT ABNORMAL	1	1862	2943	1.45301	0.20463	10.3174	0.4977	0.03398	FALSE
2	Reaction	PLEURISY	1	3437	2943	0.78697	0.11086	5.58672	1	0.03398	FALSE
2	Reaction	PNEUMOCEPHALUS	1	156	2943	17.4454	2.44269	124.594	0.05605	0.03398	FALSE
2	Reaction	PNEUMOCYSTIS TEST POSITIVE	1	28	2943	100.15	13.613	736.792	0.0103	0.03398	TRUE
2	Reaction	PNEUMONIA FUNGAL	1	1054	2943	2.56794	0.3615	18.2416	0.32277	0.03398	FALSE
2	Reaction	PNEUMONIA STREPTOCOCCAL	1	533	2943	5.08279	0.71487	36.1388	0.17888	0.03398	FALSE
2	Reaction	POLYDIPSIA	1	2150	2943	1.25828	0.17722	8.93404	0.54845	0.03398	FALSE
2	Reaction	POOR QUALITY DRUG ADMINISTERED	1	5332	2943	0.50723	0.07146	3.60045	1	0.03398	FALSE
2	Reaction	PORTAL HYPERTENSION	1	1499	2943	1.8051	0.25418	12.8191	0.42553	0.03398	FALSE
2	Reaction	PORTAL VEIN THROMBOSIS	1	1603	2943	1.68792	0.23769	11.9864	0.4472	0.03398	FALSE
2	Reaction	POSTRENAL FAILURE	1	254	2943	10.6879	1.50017	76.1459	0.08964	0.03398	FALSE
2	Reaction	PROCEDURAL HEADACHE	1	123	2943	22.1643	3.09813	158.565	0.04446	0.03398	TRUE
2	Reaction	PROCTITIS	1	1044	2943	2.59256	0.36496	18.4166	0.32026	0.03398	FALSE
2	Reaction	PRODUCT CONTAMINATION PHYSICAL	1	527	2943	5.14077	0.72301	36.5518	0.17705	0.03398	FALSE
2	Reaction	PROGRESSIVE MULTIFOCAL LEUKOENCEPHALOPATHY	1	3961	2943	0.68284	0.09619	4.84728	1	0.03398	FALSE
2	Reaction	PROSTATE CANCER	1	8241	2943	0.32816	0.04623	2.32922	0.3846	0.03398	FALSE
2	Reaction	PROSTATITIS	1	1522	2943	1.77781	0.25034	12.6252	0.43039	0.03398	FALSE
2	Reaction	PROSTHESIS IMPLANTATION	1	196	2943	13.8669	1.94413	98.9081	0.06991	0.03398	FALSE
2	Reaction	PROTEIN S INCREASED	1	21	2943	135.202	18.1504	1007.12	0.00773	0.03398	TRUE
2	Reaction	PROTEIN TOTAL ABNORMAL	1	322	2943	8.42381	1.18334	59.9661	0.11225	0.03398	FALSE
2	Reaction	PRURIGO	1	684	2943	3.95907	0.55705	28.1377	0.22347	0.03398	FALSE
2	Reaction	PRURITUS GENERALISED	1	16499	2943	0.1639	0.02309	1.16327	0.03813	0.03398	TRUE
2	Reaction	PSEUDARTHROSIS	1	153	2943	17.7898	2.49059	127.069	0.055	0.03398	FALSE
2	Reaction	PSEUDOMONAS TEST POSITIVE	1	420	2943	6.45356	0.90722	45.9079	0.14384	0.03398	FALSE
2	Reaction	PSORIATIC ARTHROPATHY	1	8232	2943	0.32852	0.04628	2.33177	0.38451	0.03398	FALSE
2	Reaction	PTERYGIUM	1	138	2943	19.7375	2.76133	141.081	0.04975	0.03398	TRUE
2	Reaction	PULMONARY ALVEOLAR HAEMORRHAGE	1	2063	2943	1.31137	0.18469	9.31116	0.53368	0.03398	FALSE
2	Reaction	PULMONARY ARTERIAL HYPERTENSION	1	6482	2943	0.41723	0.05878	2.96149	0.73845	0.03398	FALSE
2	Reaction	PULMONARY ARTERY THROMBOSIS	1	408	2943	6.64384	0.9339	47.2647	0.14003	0.03398	FALSE
2	Reaction	PULMONARY CONGESTION	1	6361	2943	0.42516	0.0599	3.01784	0.7366	0.03398	FALSE
2	Reaction	PULMONARY HYPERTENSION	1	10638	2943	0.25421	0.03582	1.80429	0.20004	0.03398	FALSE
2	Reaction	PULMONARY SARCOIDOSIS	1	415	2943	6.53151	0.91815	46.4637	0.14226	0.03398	FALSE
2	Reaction	PULMONARY SEPSIS	1	496	2943	5.46271	0.7682	38.8455	0.16757	0.03398	FALSE
2	Reaction	PYELONEPHRITIS ACUTE	1	871	2943	3.1081	0.43745	22.0829	0.27535	0.03398	FALSE
2	Reaction	Pancreatic failure	1	18	2943	159.061	21.1744	1194.87	0.00663	0.03398	TRUE
2	Reaction	Perforation	1	138	2943	19.7375	2.76133	141.081	0.04975	0.03398	TRUE
2	Reaction	Peripheral arthritis	1	116	2943	23.5134	3.28511	168.299	0.04198	0.03398	TRUE
2	Reaction	Polyglandular autoimmune syndrome type I	1	4	2943	901.348	93.7814	8662.99	0.00148	0.03398	TRUE
2	Reaction	Primary hypoparathyroidism	1	4	2943	901.348	93.7814	8662.99	0.00148	0.03398	TRUE
2	Reaction	Procedural pneumothorax	1	23	2943	122.911	16.5724	911.586	0.00847	0.03398	TRUE
2	Reaction	RADIATION MUCOSITIS	1	120	2943	22.7231	3.17559	162.596	0.0434	0.03398	TRUE
2	Reaction	RADICULOPATHY	1	1142	2943	2.36989	0.33364	16.8335	0.34445	0.03398	FALSE
2	Reaction	RASH PAPULAR	1	9206	2943	0.29376	0.04139	2.08501	0.27598	0.03398	FALSE
2	Reaction	RASH PUSTULAR	1	4420	2943	0.61191	0.0862	4.34369	1	0.03398	FALSE
2	Reaction	RECALL PHENOMENON	1	448	2943	6.04931	0.85051	43.0259	0.15266	0.03398	FALSE
2	Reaction	RECTAL ULCER HAEMORRHAGE	1	133	2943	20.4852	2.86516	146.464	0.04799	0.03398	TRUE
2	Reaction	RECTOSIGMOID CANCER	1	115	2943	23.7197	3.31368	169.788	0.04163	0.03398	TRUE
2	Reaction	RECURRENT CANCER	1	1136	2943	2.38242	0.33541	16.9225	0.343	0.03398	FALSE
2	Reaction	RED CELL DISTRIBUTION WIDTH INCREASED	1	1012	2943	2.67462	0.3765	19.0001	0.31217	0.03398	FALSE
2	Reaction	RENAL DISORDER	1	20016	2943	0.1351	0.01904	0.95885	0.00911	0.03398	TRUE
2	Reaction	RENAL VEIN THROMBOSIS	1	318	2943	8.5301	1.19823	60.7252	0.11093	0.03398	FALSE
2	Reaction	RESPIRATION ABNORMAL	1	1525	2943	1.77431	0.24985	12.6003	0.43103	0.03398	FALSE
2	Reaction	RESPIRATORY DISORDER	1	13805	2943	0.19589	0.0276	1.39031	0.07252	0.03398	FALSE
2	Reaction	RESPIRATORY TRACT INFECTION	1	9184	2943	0.29446	0.04149	2.09001	0.27588	0.03398	FALSE
2	Reaction	RESPIRATORY TRACT INFLAMMATION	1	181	2943	15.0225	2.10527	107.195	0.06473	0.03398	FALSE
2	Reaction	RESTLESSNESS	1	17727	2943	0.15255	0.02149	1.08268	0.01821	0.03398	TRUE
2	Reaction	RETICULOCYTOSIS	1	94	2943	29.0757	4.05409	208.53	0.03416	0.03398	TRUE
2	Reaction	RETINITIS	1	274	2943	9.90492	1.39066	70.5474	0.09635	0.03398	FALSE
2	Reaction	RETROGRADE AMNESIA	1	268	2943	10.1275	1.4218	72.1386	0.09434	0.03398	FALSE
2	Reaction	RETROPERITONEAL HAEMORRHAGE	1	1555	2943	1.74005	0.24503	12.3569	0.4373	0.03398	FALSE
2	Reaction	RHINITIS	1	3273	2943	0.82642	0.11641	5.86682	1	0.03398	FALSE
2	Reaction	RHINITIS ALLERGIC	1	1959	2943	1.38102	0.1945	9.80598	0.5154	0.03398	FALSE
2	Reaction	Radioembolisation	1	5	2943	676.011	75.5776	6046.64	0.00185	0.03398	TRUE
2	Reaction	Rheumatic disorder	1	535	2943	5.06375	0.7122	36.0032	0.17948	0.03398	FALSE
2	Reaction	SCAB	1	4174	2943	0.64799	0.09128	4.59981	1	0.03398	FALSE
2	Reaction	SCAR	1	8417	2943	0.3213	0.04527	2.2805	0.38659	0.03398	FALSE
2	Reaction	SCLERODERMA	1	1711	2943	1.58131	0.22269	11.2289	0.46885	0.03398	FALSE
2	Reaction	SCROTAL SWELLING	1	489	2943	5.54107	0.7792	39.4038	0.16541	0.03398	FALSE
2	Reaction	SEBORRHOEIC KERATOSIS	1	674	2943	4.01789	0.56532	28.5564	0.22059	0.03398	FALSE
2	Reaction	SENSORY DISTURBANCE	1	9678	2943	0.27943	0.03937	1.9833	0.28037	0.03398	FALSE
2	Reaction	SENSORY LOSS	1	4050	2943	0.66783	0.09408	4.74071	1	0.03398	FALSE
2	Reaction	SEROMA	1	747	2943	3.62472	0.51007	25.7583	0.24135	0.03398	FALSE
2	Reaction	SERUM AMYLOID A PROTEIN INCREASED	1	21	2943	135.202	18.1504	1007.12	0.00773	0.03398	TRUE
2	Reaction	SERUM SICKNESS	1	1527	2943	1.77198	0.24952	12.5838	0.43145	0.03398	FALSE
2	Reaction	SIALOADENITIS	1	527	2943	5.14077	0.72301	36.5518	0.17705	0.03398	FALSE
2	Reaction	SINUS CONGESTION	1	6524	2943	0.41454	0.0584	2.94242	0.73913	0.03398	FALSE
2	Reaction	SKIN ATROPHY	1	2184	2943	1.23868	0.17446	8.79483	0.55409	0.03398	FALSE
2	Reaction	SKIN CANCER	1	5386	2943	0.50214	0.07074	3.56434	1	0.03398	FALSE
2	Reaction	SKIN FISSURES	1	3691	2943	0.7328	0.10323	5.20206	1	0.03398	FALSE
2	Reaction	SKIN IRRITATION	1	6486	2943	0.41697	0.05874	2.95966	0.73852	0.03398	FALSE
2	Reaction	SKIN MASS	1	2109	2943	1.28275	0.18066	9.10788	0.54155	0.03398	FALSE
2	Reaction	SKIN NECROSIS	1	2598	2943	1.04122	0.14666	7.39227	0.6174	0.03398	FALSE
2	Reaction	SMALL INTESTINAL PERFORATION	1	832	2943	3.25396	0.45796	23.1205	0.26482	0.03398	FALSE
2	Reaction	SMALL INTESTINAL RESECTION	1	423	2943	6.40769	0.90078	45.5808	0.14479	0.03398	FALSE
2	Reaction	SOFT TISSUE INFECTION	1	813	2943	3.3301	0.46866	23.6622	0.25964	0.03398	FALSE
2	Reaction	SPINAL COLUMN STENOSIS	1	4184	2943	0.64644	0.09107	4.58881	1	0.03398	FALSE
2	Reaction	SPINAL DISORDER	1	4572	2943	0.59156	0.08334	4.19921	1	0.03398	FALSE
2	Reaction	SPINAL OPERATION	1	2164	2943	1.25014	0.17607	8.87619	0.55078	0.03398	FALSE
2	Reaction	SPINAL PAIN	1	3571	2943	0.75744	0.1067	5.37696	1	0.03398	FALSE
2	Reaction	SPLEEN DISORDER	1	852	2943	3.17749	0.44721	22.5765	0.27024	0.03398	FALSE
2	Reaction	SPUTUM RETENTION	1	356	2943	7.61702	1.07032	54.2071	0.12334	0.03398	FALSE
2	Reaction	SQUAMOUS CELL CARCINOMA OF SKIN	1	2129	2943	1.2707	0.17897	9.02224	0.54493	0.03398	FALSE
2	Reaction	STATUS EPILEPTICUS	1	4755	2943	0.56879	0.08013	4.03754	1	0.03398	FALSE
2	Reaction	STERNAL FRACTURE	1	506	2943	5.35454	0.75302	38.0748	0.17064	0.03398	FALSE
2	Reaction	STRIDOR	1	1530	2943	1.7685	0.24903	12.5591	0.43208	0.03398	FALSE
2	Reaction	STRONGYLOIDIASIS	1	449	2943	6.03581	0.84862	42.9297	0.15297	0.03398	FALSE
2	Reaction	SUBARACHNOID HAEMORRHAGE	1	4579	2943	0.59066	0.08321	4.19279	1	0.03398	FALSE
2	Reaction	SUBCUTANEOUS ABSCESS	1	2261	2943	1.19648	0.16852	8.49505	0.56661	0.03398	FALSE
2	Reaction	SUBDURAL HAEMORRHAGE	1	1354	2943	1.99855	0.2814	14.1939	0.39388	0.03398	FALSE
2	Reaction	SUBILEUS	1	1163	2943	2.32706	0.32762	16.529	0.34952	0.03398	FALSE
2	Reaction	SUDDEN HEARING LOSS	1	944	2943	2.86749	0.40363	20.3716	0.29465	0.03398	FALSE
2	Reaction	SUICIDE ATTEMPT	1	28518	2943	0.09482	0.01336	0.67297	0.00055	0.03398	TRUE
2	Reaction	SUNBURN	1	3941	2943	0.68631	0.09668	4.8719	1	0.03398	FALSE
2	Reaction	SUPRAPUBIC PAIN	1	281	2943	9.6573	1.35601	68.7776	0.09869	0.03398	FALSE
2	Reaction	SWELLING FACE	1	29629	2943	0.09127	0.01286	0.64774	0.00039	0.03398	TRUE
2	Reaction	SWOLLEN TONGUE	1	16045	2943	0.16854	0.02375	1.19619	0.03677	0.03398	TRUE
2	Reaction	Synovial cyst removal	1	6	2943	540.809	63.1996	4627.79	0.00222	0.03398	TRUE
2	Reaction	TACHYPNOEA	1	5372	2943	0.50345	0.07093	3.57364	1	0.03398	FALSE
2	Reaction	TEMPORAL ARTERITIS	1	667	2943	4.06012	0.57125	28.857	0.21857	0.03398	FALSE
2	Reaction	TENDERNESS	1	5026	2943	0.53812	0.07581	3.81975	1	0.03398	FALSE
2	Reaction	TENOSYNOVITIS	1	997	2943	2.7149	0.38217	19.2865	0.30834	0.03398	FALSE
2	Reaction	TESTICULAR PAIN	1	1543	2943	1.75359	0.24693	12.4531	0.4348	0.03398	FALSE
2	Reaction	THERAPEUTIC EMBOLISATION	1	195	2943	13.9384	1.95411	99.4205	0.06956	0.03398	FALSE
2	Reaction	THERAPEUTIC PROCEDURE	1	585	2943	4.63021	0.65133	32.9156	0.19451	0.03398	FALSE
2	Reaction	THERAPY RESPONDER	1	391	2943	6.93344	0.97451	49.3301	0.13461	0.03398	FALSE
2	Reaction	THIRST DECREASED	1	246	2943	11.0369	1.54896	78.6422	0.08695	0.03398	FALSE
2	Reaction	THORACOSTOMY	1	64	2943	42.9213	5.95484	309.368	0.02339	0.03398	TRUE
2	Reaction	THROAT IRRITATION	1	18376	2943	0.14716	0.02073	1.04444	0.01871	0.03398	TRUE
2	Reaction	THROMBOCYTOPENIC PURPURA	1	853	2943	3.17376	0.44669	22.55	0.27051	0.03398	FALSE
2	Reaction	THROMBOCYTOSIS	1	1325	2943	2.04233	0.28756	14.5051	0.38735	0.03398	FALSE
2	Reaction	THROMBOTIC MICROANGIOPATHY	1	2964	2943	0.9126	0.12855	6.47885	1	0.03398	FALSE
2	Reaction	THROMBOTIC THROMBOCYTOPENIC PURPURA	1	2257	2943	1.1986	0.16882	8.51012	0.56597	0.03398	FALSE
2	Reaction	THYROIDITIS CHRONIC	1	39	2943	71.159	9.77301	518.122	0.01432	0.03398	TRUE
2	Reaction	TONGUE DISCOLOURATION	1	2699	2943	1.00224	0.14117	7.11544	0.63143	0.03398	FALSE
2	Reaction	TONGUE ULCERATION	1	1705	2943	1.58688	0.22347	11.2685	0.46767	0.03398	FALSE
2	Reaction	TOOTH EXTRACTION	1	6965	2943	0.38829	0.0547	2.75606	0.53057	0.03398	FALSE
2	Reaction	TOOTH INFECTION	1	5110	2943	0.52927	0.07456	3.75693	1	0.03398	FALSE
2	Reaction	TOXIC ENCEPHALOPATHY	1	1640	2943	1.64981	0.23233	11.7157	0.45472	0.03398	FALSE
2	Reaction	TRACHEITIS	1	307	2943	8.83674	1.24117	62.9151	0.10731	0.03398	FALSE
2	Reaction	TRANSFUSION-ASSOCIATED DYSPNOEA	1	10	2943	300.449	38.0756	2370.8	0.00369	0.03398	TRUE
2	Reaction	TRANSPLANT REJECTION	1	2959	2943	0.91415	0.12877	6.48981	1	0.03398	FALSE
2	Reaction	TREATMENT FAILURE	1	8353	2943	0.32376	0.04561	2.29798	0.3858	0.03398	FALSE
2	Reaction	TRI-IODOTHYRONINE DECREASED	1	225	2943	12.0716	1.69354	86.0471	0.07983	0.03398	FALSE
2	Reaction	TRICUSPID VALVE INCOMPETENCE	1	4778	2943	0.56605	0.07974	4.01809	1	0.03398	FALSE
2	Reaction	TROPONIN I INCREASED	1	764	2943	3.54396	0.49872	25.1837	0.2461	0.03398	FALSE
2	Reaction	TROPONIN T INCREASED	1	548	2943	4.94341	0.69531	35.1461	0.18342	0.03398	FALSE
2	Reaction	TUMOUR ASSOCIATED FEVER	1	110	2943	24.8077	3.46432	177.646	0.03986	0.03398	TRUE
2	Reaction	TUMOUR COMPRESSION	1	129	2943	21.1253	2.95401	151.076	0.04658	0.03398	TRUE
2	Reaction	TUMOUR EXCISION	1	382	2943	7.09723	0.99747	50.4984	0.13173	0.03398	FALSE
2	Reaction	TUMOUR FLARE	1	319	2943	8.50328	1.19447	60.5336	0.11126	0.03398	FALSE
2	Reaction	TUMOUR PAIN	1	420	2943	6.45356	0.90722	45.9079	0.14384	0.03398	FALSE
2	Reaction	TUMOUR ULCERATION	1	69	2943	39.7653	5.52325	286.295	0.02519	0.03398	TRUE
2	Reaction	Thyroid hormones decreased	1	97	2943	28.1671	3.92868	201.947	0.03523	0.03398	TRUE
2	Reaction	Tongue discomfort	1	517	2943	5.24039	0.737	37.2616	0.174	0.03398	FALSE
2	Reaction	ULCER HAEMORRHAGE	1	3650	2943	0.74104	0.10439	5.26052	1	0.03398	FALSE
2	Reaction	ULCERATIVE KERATITIS	1	1180	2943	2.29351	0.3229	16.2905	0.3536	0.03398	FALSE
2	Reaction	UPPER RESPIRATORY TRACT INFLAMMATION	1	731	2943	3.70417	0.52124	26.3237	0.23685	0.03398	FALSE
2	Reaction	URETHRITIS	1	246	2943	11.0369	1.54896	78.6422	0.08695	0.03398	FALSE
2	Reaction	URINARY TRACT OBSTRUCTION	1	841	2943	3.2191	0.45306	22.8725	0.26727	0.03398	FALSE
2	Reaction	URINE OUTPUT INCREASED	1	1389	2943	1.94816	0.27431	13.8358	0.40168	0.03398	FALSE
2	Reaction	Ulcerative gastritis	1	15	2943	193.146	25.4057	1468.38	0.00553	0.03398	TRUE
2	Reaction	Ureterolithiasis	1	166	2943	16.3881	2.29552	116.998	0.05953	0.03398	FALSE
2	Reaction	Urticarial vasculitis	1	38	2943	73.0823	10.0302	532.491	0.01395	0.03398	TRUE
2	Reaction	VARICOCELE	1	157	2943	17.3336	2.42713	123.79	0.0564	0.03398	FALSE
2	Reaction	VENA CAVA FILTER INSERTION	1	268	2943	10.1275	1.4218	72.1386	0.09434	0.03398	FALSE
2	Reaction	VENA CAVA THROMBOSIS	1	966	2943	2.80212	0.39443	19.9067	0.30037	0.03398	FALSE
2	Reaction	VENOUS THROMBOSIS	1	2153	2943	1.25653	0.17697	8.92158	0.54895	0.03398	FALSE
2	Reaction	VENTRICULAR DYSFUNCTION	1	1740	2943	1.55494	0.21898	11.0416	0.47451	0.03398	FALSE
2	Reaction	VENTRICULAR FLUTTER	1	105	2943	26.0004	3.62931	186.267	0.03808	0.03398	TRUE
2	Reaction	VERTEBRAL COLUMN MASS	1	110	2943	24.8077	3.46432	177.646	0.03986	0.03398	TRUE
2	Reaction	VERTIGO POSITIONAL	1	826	2943	3.27763	0.46129	23.2889	0.26319	0.03398	FALSE
2	Reaction	VIIITH NERVE INJURY	1	27	2943	104.002	14.1172	766.18	0.00993	0.03398	TRUE
2	Reaction	VIITH NERVE PARALYSIS	1	3678	2943	0.73539	0.10359	5.22045	1	0.03398	FALSE
2	Reaction	VIRAL TEST POSITIVE	1	184	2943	14.7762	2.07094	105.428	0.06577	0.03398	FALSE
2	Reaction	VOCAL CORD PARALYSIS	1	844	2943	3.20764	0.45145	22.791	0.26808	0.03398	FALSE
2	Reaction	VOLVULUS	1	789	2943	3.43153	0.48292	24.3837	0.25304	0.03398	FALSE
2	Reaction	WEIGHT ABNORMAL	1	589	2943	4.59871	0.6469	32.6913	0.19571	0.03398	FALSE
2	Reaction	WHITE BLOOD CELL COUNT	1	128	2943	21.2917	2.97709	152.275	0.04623	0.03398	TRUE
2	Reaction	WHITE BLOOD CELL COUNT ABNORMAL	1	1894	2943	1.42844	0.20117	10.1429	0.50361	0.03398	FALSE
2	Reaction	WOUND SEPSIS	1	115	2943	23.7197	3.31368	169.788	0.04163	0.03398	TRUE
2	Reaction	WRONG DRUG ADMINISTERED	1	8134	2943	0.33248	0.04684	2.35987	0.38369	0.03398	FALSE
2	Reaction	XEROSIS	1	451	2943	6.00898	0.84486	42.7385	0.1536	0.03398	FALSE
2	Reaction	YELLOW SKIN	1	2330	2943	1.16103	0.16353	8.24327	0.57753	0.03398	FALSE

## Sheet: Cohort 3
COHORT	CONCEPT	NAME	CONCEPT_AES_IN_COHORT	CONCEPT_CASE_COUNT	COHORT_SIZE	PRR	PRR_95CI(-)	PRR_95CI(+)	P-value Fisher Exact Test (two tailed)	COHORT_%COVERAGE	Significant_FisherExactTest
3	Reaction	DIARRHOEA	175	235661	1574	3.75791	3.26782	4.3215	0	11.1182	TRUE
3	Reaction	COLITIS	164	12513	1574	67.1562	58.0378	77.7071	0	10.4193	TRUE
3	Reaction	MALIGNANT NEOPLASM PROGRESSION	151	30093	1574	25.5018	21.904	29.6905	0	9.59339	TRUE
3	Reaction	PYREXIA	139	155533	1574	4.52329	3.85908	5.30182	0	8.831	TRUE
3	Reaction	DEATH	84	340884	1574	1.24639	1.01223	1.53472	0.04592	5.33672	TRUE
3	Reaction	NAUSEA	74	342597	1574	1.09249	0.8746	1.36466	0.4194	4.7014	FALSE
3	Reaction	RASH	60	157441	1574	1.92785	1.50409	2.47099	0	3.81194	TRUE
3	Reaction	HYPOPHYSITIS	58	475	1574	703.341	536.811	921.532	0	3.68488	TRUE
3	Reaction	DEHYDRATION	55	67030	1574	4.15264	3.20274	5.38426	0	3.49428	TRUE
3	Reaction	FATIGUE	54	290118	1574	0.9414	0.72432	1.22353	0.73633	3.43075	FALSE
3	Reaction	VOMITING	54	208039	1574	1.31291	1.01016	1.70641	0.04773	3.43075	TRUE
3	Reaction	PNEUMONITIS	52	8805	1574	30.0414	22.9767	39.2783	0	3.30368	TRUE
3	Reaction	DYSPNOEA	50	243040	1574	1.04053	0.79212	1.36685	0.76916	3.17662	FALSE
3	Reaction	Acute kidney injury	49	24144	1574	10.2835	7.80411	13.5507	0	3.11309	TRUE
3	Reaction	HEADACHE	46	267648	1574	0.86925	0.65384	1.15561	0.36339	2.92249	FALSE
3	Reaction	ADRENAL INSUFFICIENCY	45	2959	1574	78.0902	58.4174	104.388	0	2.85896	TRUE
3	Reaction	HYPERTHYROIDISM	45	5350	1574	42.8944	32.1212	57.281	0	2.85896	TRUE
3	Reaction	HYPOTHYROIDISM	41	12738	1574	16.3289	12.0655	22.0988	0	2.60483	TRUE
3	Reaction	ALANINE AMINOTRANSFERASE INCREASED	40	34856	1574	5.80972	4.27769	7.89044	0	2.5413	TRUE
3	Reaction	HEPATITIS	37	11781	1574	15.9316	11.5812	21.9163	0	2.3507	TRUE
3	Reaction	PNEUMONIA	35	128928	1574	1.37313	0.98951	1.90548	0.07086	2.22363	FALSE
3	Reaction	ABDOMINAL PAIN	34	104338	1574	1.64836	1.18204	2.29865	0.00535	2.1601	TRUE
3	Reaction	AUTOIMMUNE HEPATITIS	34	2645	1574	65.8485	47.1185	92.0239	0	2.1601	TRUE
3	Reaction	GENERAL PHYSICAL HEALTH DETERIORATION	34	41638	1574	4.13255	2.9632	5.76335	0	2.1601	TRUE
3	Reaction	ASPARTATE AMINOTRANSFERASE INCREASED	32	31426	1574	5.15439	3.65731	7.26427	0	2.03304	TRUE
3	Reaction	SEPSIS	31	50407	1574	3.1118	2.19581	4.4099	0	1.9695	TRUE
3	Reaction	HYPONATRAEMIA	30	25655	1574	5.92013	4.15258	8.44005	0	1.90597	TRUE
3	Reaction	HYPOTENSION	30	87147	1574	1.74137	1.22164	2.48222	0.00481	1.90597	TRUE
3	Reaction	LIVER DISORDER	28	20495	1574	6.91795	4.79114	9.98886	0	1.77891	TRUE
3	Reaction	DECREASED APPETITE	26	87299	1574	1.50649	1.02894	2.20569	0.03929	1.65184	TRUE
3	Reaction	PRURITUS	26	125446	1574	1.04829	0.716	1.5348	0.76119	1.65184	FALSE
3	Reaction	ARTHRALGIA	24	154147	1574	0.78744	0.5294	1.17127	0.27166	1.52478	FALSE
3	Reaction	OFF LABEL USE	24	149692	1574	0.81088	0.54515	1.20613	0.35249	1.52478	FALSE
3	Reaction	ANAEMIA	23	91531	1574	1.27099	0.84709	1.90702	0.23597	1.46125	FALSE
3	Reaction	COUGH	23	102635	1574	1.13345	0.75543	1.70064	0.50233	1.46125	FALSE
3	Reaction	Autoimmune colitis	22	98	1574	1463.8	913.111	2346.62	0	1.39771	TRUE
3	Reaction	HYPOPITUITARISM	22	461	1574	253.415	165.616	387.759	0	1.39771	TRUE
3	Reaction	ATRIAL FIBRILLATION	21	42363	1574	2.50797	1.63971	3.83597	0.00016	1.33418	TRUE
3	Reaction	HEPATIC FUNCTION ABNORMAL	20	15901	1574	6.36834	4.1189	9.84626	0	1.27065	TRUE
3	Reaction	TRANSAMINASES INCREASED	20	9299	1574	10.8994	7.0481	16.8552	0	1.27065	TRUE
3	Reaction	ASTHENIA	18	166251	1574	0.54756	0.34589	0.86681	0.00612	1.14358	TRUE
3	Reaction	HEPATOTOXICITY	18	7483	1574	12.1932	7.69822	19.3127	0	1.14358	TRUE
3	Reaction	MYOCARDITIS	18	2713	1574	33.7744	21.3026	53.548	0	1.14358	TRUE
3	Reaction	CHILLS	17	53552	1574	1.60578	1.00074	2.57662	0.06123	1.08005	FALSE
3	Reaction	CONFUSIONAL STATE	17	76769	1574	1.12004	0.69804	1.79717	0.60455	1.08005	FALSE
3	Reaction	DIABETIC KETOACIDOSIS	17	8928	1574	9.64709	6.00988	15.4855	0	1.08005	TRUE
3	Reaction	ENTEROCOLITIS	17	1855	1574	46.7711	29.0862	75.2086	0	1.08005	TRUE
3	Reaction	LIPASE INCREASED	17	4129	1574	20.9059	13.0169	33.5761	0	1.08005	TRUE
3	Reaction	PLEURAL EFFUSION	17	30354	1574	2.83368	1.76587	4.54716	0.00017	1.08005	TRUE
3	Reaction	RENAL FAILURE	17	59607	1574	1.44261	0.89906	2.31479	0.1402	1.08005	FALSE
3	Reaction	THYROIDITIS	17	829	1574	105.868	65.6558	170.711	0	1.08005	TRUE
3	Reaction	TYPE 1 DIABETES MELLITUS	17	2436	1574	35.5375	22.1119	57.1146	0	1.08005	TRUE
3	Reaction	WEIGHT DECREASED	17	115015	1574	0.74754	0.46589	1.19944	0.28887	1.08005	FALSE
3	Reaction	HYPERGLYCAEMIA	16	17896	1574	4.52508	2.7785	7.36956	0	1.01652	TRUE
3	Reaction	MALAISE	16	194484	1574	0.41605	0.25552	0.67745	6e-05	1.01652	TRUE
3	Reaction	PULMONARY EMBOLISM	16	54859	1574	1.47527	0.90599	2.40228	0.1245	1.01652	FALSE
3	Reaction	HEPATIC ENZYME INCREASED	15	25839	1574	2.93725	1.77478	4.86115	0.00027	0.95299	TRUE
3	Reaction	MYALGIA	15	78186	1574	0.97033	0.58636	1.60574	1	0.95299	FALSE
3	Reaction	ARTHRITIS	14	31815	1574	2.22618	1.32138	3.75055	0.00714	0.88945	TRUE
3	Reaction	BACK PAIN	14	102670	1574	0.68963	0.40937	1.16176	0.17953	0.88945	FALSE
3	Reaction	CHOLESTASIS	14	7435	1574	9.5398	5.66032	16.0782	0	0.88945	TRUE
3	Reaction	HEPATOCELLULAR INJURY	14	4607	1574	15.4137	9.1427	25.9858	0	0.88945	TRUE
3	Reaction	HYPOKALAEMIA	14	19848	1574	3.56937	2.1185	6.01389	6e-05	0.88945	TRUE
3	Reaction	INTERSTITIAL LUNG DISEASE	14	18587	1574	3.81171	2.2623	6.42228	3e-05	0.88945	TRUE
3	Reaction	METASTASES TO CENTRAL NERVOUS SYSTEM	14	4640	1574	15.3037	9.07753	25.8003	0	0.88945	TRUE
3	Reaction	MUSCULAR WEAKNESS	14	53551	1574	1.32235	0.78494	2.22772	0.27777	0.88945	FALSE
3	Reaction	RASH MACULO-PAPULAR	14	8773	1574	8.08253	4.79603	13.6211	0	0.88945	TRUE
3	Reaction	THROMBOCYTOPENIA	14	47092	1574	1.50378	0.89262	2.53338	0.13483	0.88945	FALSE
3	Reaction	ADVERSE EVENT	13	44953	1574	1.4628	0.85122	2.51378	0.17394	0.82592	FALSE
3	Reaction	DIABETES MELLITUS	13	40952	1574	1.60576	0.9344	2.75947	0.10737	0.82592	FALSE
3	Reaction	ENCEPHALITIS	13	2751	1574	24.0095	13.9545	41.3099	0	0.82592	TRUE
3	Reaction	ENTERITIS	13	2035	1574	32.5114	18.8872	55.9635	0	0.82592	TRUE
3	Reaction	CONSTIPATION	12	80726	1574	0.75181	0.42786	1.32103	0.37828	0.76239	FALSE
3	Reaction	NEUROPATHY PERIPHERAL	12	32447	1574	1.87086	1.06466	3.28756	0.04288	0.76239	TRUE
3	Reaction	PAIN	12	231205	1574	0.26247	0.14938	0.46118	0	0.76239	TRUE
3	Reaction	PANCREATITIS	12	29276	1574	2.07358	1.18001	3.64383	0.01857	0.76239	TRUE
3	Reaction	PANCYTOPENIA	12	24659	1574	2.46202	1.40102	4.32651	0.00443	0.76239	TRUE
3	Reaction	SEPTIC SHOCK	12	17275	1574	3.51511	2.00017	6.17748	0.00023	0.76239	TRUE
3	Reaction	MYOSITIS	11	3748	1574	14.8848	8.253	26.8457	0	0.69886	TRUE
3	Reaction	RHABDOMYOLYSIS	11	20861	1574	2.66784	1.48027	4.80819	0.00351	0.69886	TRUE
3	Reaction	TRANSFUSION	11	4687	1574	11.8958	6.59684	21.451	0	0.69886	TRUE
3	Reaction	TUBULOINTERSTITIAL NEPHRITIS	11	4827	1574	11.55	6.4052	20.827	0	0.69886	TRUE
3	Reaction	BLOOD ALKALINE PHOSPHATASE INCREASED	10	16186	1574	3.1261	1.68499	5.79973	0.00174	0.63532	TRUE
3	Reaction	BLOOD CREATININE INCREASED	10	33009	1574	1.5324	0.82606	2.84273	0.16632	0.63532	FALSE
3	Reaction	GASTROINTESTINAL DISORDER	10	27023	1574	1.87198	1.00909	3.47275	0.05046	0.63532	FALSE
3	Reaction	SYNCOPE	10	47597	1574	1.06264	0.57284	1.97122	0.74394	0.63532	FALSE
3	Reaction	CEREBRAL HAEMORRHAGE	9	17593	1574	2.58821	1.34896	4.9659	0.00943	0.57179	TRUE
3	Reaction	DIZZINESS	9	225173	1574	0.20212	0.10536	0.38775	0	0.57179	TRUE
3	Reaction	GAMMA-GLUTAMYLTRANSFERASE INCREASED	9	13518	1574	3.36894	1.75579	6.4642	0.00177	0.57179	TRUE
3	Reaction	MYOCARDIAL INFARCTION	9	125804	1574	0.36179	0.18859	0.69405	0.00052	0.57179	TRUE
3	Reaction	PARAESTHESIA	9	76635	1574	0.59394	0.3096	1.13942	0.12103	0.57179	FALSE
3	Reaction	ABDOMINAL PAIN UPPER	8	85903	1574	0.47097	0.23594	0.94014	0.02688	0.50826	TRUE
3	Reaction	AMYLASE INCREASED	8	1433	1574	28.3889	14.1944	56.7779	0	0.50826	TRUE
3	Reaction	CHEST PAIN	8	97663	1574	0.41426	0.20753	0.82693	0.00573	0.50826	TRUE
3	Reaction	DYSGEUSIA	8	38684	1574	1.04598	0.52397	2.08804	0.85484	0.50826	FALSE
3	Reaction	DYSPHAGIA	8	41787	1574	0.96829	0.48506	1.93294	1	0.50826	FALSE
3	Reaction	INSOMNIA	8	128002	1574	0.31606	0.15834	0.63091	0.00012	0.50826	TRUE
3	Reaction	Immune thrombocytopenic purpura	8	1345	1574	30.2575	15.1268	60.5227	0	0.50826	TRUE
3	Reaction	MENINGITIS ASEPTIC	8	1714	1574	23.7129	11.8602	47.4107	0	0.50826	TRUE
3	Reaction	SKIN DISORDER	8	12517	1574	3.23401	1.61979	6.45688	0.00396	0.50826	TRUE
3	Reaction	AUTOIMMUNE PANCREATITIS	7	116	1574	324.747	151.475	696.227	0	0.44473	TRUE
3	Reaction	CELLULITIS	7	22835	1574	1.55062	0.74036	3.24763	0.23066	0.44473	FALSE
3	Reaction	CHOLECYSTITIS	7	6558	1574	5.40336	2.57916	11.3201	0.00039	0.44473	TRUE
3	Reaction	DERMATITIS	7	5939	1574	5.9672	2.84818	12.5018	0.00022	0.44473	TRUE
3	Reaction	DRUG INEFFECTIVE	7	453261	1574	0.0781	0.03729	0.16355	0	0.44473	TRUE
3	Reaction	DRUG-INDUCED LIVER INJURY	7	6447	1574	5.4965	2.6236	11.5153	0.00036	0.44473	TRUE
3	Reaction	FALL	7	144247	1574	0.24541	0.11718	0.51393	0	0.44473	TRUE
3	Reaction	GASTRITIS	7	13538	1574	2.61603	1.24895	5.47947	0.01963	0.44473	TRUE
3	Reaction	GASTROENTERITIS	7	7037	1574	5.0352	2.40349	10.5485	0.00059	0.44473	TRUE
3	Reaction	HEPATIC FAILURE	7	16258	1574	2.17817	1.03994	4.5622	0.04531	0.44473	TRUE
3	Reaction	HYPERKALAEMIA	7	15461	1574	2.2905	1.09356	4.79753	0.03629	0.44473	TRUE
3	Reaction	HYPOAESTHESIA	7	70682	1574	0.50085	0.23915	1.0489	0.05927	0.44473	FALSE
3	Reaction	HYPOXIA	7	14660	1574	2.41571	1.15333	5.05983	0.02851	0.44473	TRUE
3	Reaction	INFLUENZA LIKE ILLNESS	7	44482	1574	0.7959	0.38003	1.66684	0.73333	0.44473	FALSE
3	Reaction	INFUSION RELATED REACTION	7	20309	1574	1.74354	0.83246	3.65176	0.12993	0.44473	FALSE
3	Reaction	INTESTINAL PERFORATION	7	5252	1574	6.7488	3.22105	14.1402	0.0001	0.44473	TRUE
3	Reaction	LIVER FUNCTION TEST ABNORMAL	7	20957	1574	1.68962	0.80672	3.53879	0.20718	0.44473	FALSE
3	Reaction	LUNG DISORDER	7	19962	1574	1.77386	0.84694	3.71527	0.12414	0.44473	FALSE
3	Reaction	LYMPHOCYTIC HYPOPHYSITIS	7	60	1574	667.876	304.125	1466.7	0	0.44473	TRUE
3	Reaction	OEDEMA PERIPHERAL	7	76483	1574	0.46286	0.22101	0.96934	0.03698	0.44473	TRUE
3	Reaction	PAIN IN EXTREMITY	7	137541	1574	0.25737	0.1229	0.53899	1e-05	0.44473	TRUE
3	Reaction	Seizure	7	25843	1574	1.37008	0.65417	2.86948	0.36908	0.44473	FALSE
3	Reaction	UVEITIS	7	3374	1574	10.513	5.01626	22.0332	1e-05	0.44473	TRUE
3	Reaction	ASCITES	6	14005	1574	2.16735	0.97501	4.81779	0.06225	0.38119	FALSE
3	Reaction	BLOOD THYROID STIMULATING HORMONE DECREASED	6	1615	1574	18.8569	8.4718	41.9723	0	0.38119	TRUE
3	Reaction	BRAIN OEDEMA	6	6175	1574	4.91825	2.21206	10.9351	0.00162	0.38119	TRUE
3	Reaction	C-REACTIVE PROTEIN INCREASED	6	13447	1574	2.25732	1.01548	5.01783	0.0533	0.38119	FALSE
3	Reaction	CHOLANGITIS	6	2273	1574	13.3836	6.01545	29.7769	1e-05	0.38119	TRUE
3	Reaction	CYTOKINE RELEASE SYNDROME	6	465	1574	66.1017	29.5869	147.681	0	0.38119	TRUE
3	Reaction	DISSEMINATED INTRAVASCULAR COAGULATION	6	8420	1574	3.60597	1.62201	8.01663	0.00722	0.38119	TRUE
3	Reaction	GAIT DISTURBANCE	6	86232	1574	0.35187	0.15832	0.78207	0.0046	0.38119	TRUE
3	Reaction	HYPERTENSION	6	94216	1574	0.32205	0.1449	0.71579	0.00145	0.38119	TRUE
3	Reaction	INFECTION	6	52911	1574	0.57349	0.25803	1.27466	0.21179	0.38119	FALSE
3	Reaction	LEUKODERMA	6	70	1574	474.073	205.611	1093.06	0	0.38119	TRUE
3	Reaction	MALIGNANT MELANOMA	6	5405	1574	5.61968	2.5274	12.4954	0.00083	0.38119	TRUE
3	Reaction	MENINGORADICULITIS	6	42	1574	842.796	355.619	1997.38	0	0.38119	TRUE
3	Reaction	METASTASES TO BONE	6	5624	1574	5.40062	2.42892	12.0081	0.00101	0.38119	TRUE
3	Reaction	METASTASES TO LUNG	6	4340	1574	7.00062	3.14811	15.5676	0.00026	0.38119	TRUE
3	Reaction	Multiple organ dysfunction syndrome	6	3383	1574	8.9845	4.03962	19.9824	7e-05	0.38119	TRUE
3	Reaction	NEUTROPENIA	6	43670	1574	0.69487	0.31263	1.54444	0.49257	0.38119	FALSE
3	Reaction	PACKED RED BLOOD CELL TRANSFUSION	6	777	1574	39.3524	17.6512	87.7339	0	0.38119	TRUE
3	Reaction	POLYARTHRITIS	6	1693	1574	17.985	8.08065	40.0289	0	0.38119	TRUE
3	Reaction	SKIN DISCOLOURATION	6	19255	1574	1.57622	0.70912	3.50361	0.29172	0.38119	FALSE
3	Reaction	SMALL INTESTINAL OBSTRUCTION	6	5441	1574	5.58246	2.51066	12.4126	0.00086	0.38119	TRUE
3	Reaction	TRI-IODOTHYRONINE FREE DECREASED	6	74	1574	446.186	193.926	1026.59	0	0.38119	TRUE
3	Reaction	URINARY TRACT INFECTION	6	66114	1574	0.45896	0.2065	1.02007	0.05015	0.38119	FALSE
3	Reaction	BLOOD THYROID STIMULATING HORMONE INCREASED	5	3189	1574	7.94092	3.30751	19.0652	0.00049	0.31766	TRUE
3	Reaction	DEEP VEIN THROMBOSIS	5	41412	1574	0.61062	0.25449	1.46509	0.37657	0.31766	FALSE
3	Reaction	ENCEPHALOPATHY	5	10511	1574	2.40661	1.00287	5.77521	0.05984	0.31766	FALSE
3	Reaction	ENTEROCOLITIS HAEMORRHAGIC	5	808	1574	31.4868	13.088	75.7503	0	0.31766	TRUE
3	Reaction	EOSINOPHILIA	5	6629	1574	3.81701	1.59041	9.1609	0.01097	0.31766	TRUE
3	Reaction	ERYTHEMA	5	69879	1574	0.36185	0.15081	0.86819	0.01387	0.31766	TRUE
3	Reaction	Fulminant type 1 diabetes mellitus	5	67	1574	407.805	164.175	1012.97	0	0.31766	TRUE
3	Reaction	GASTROINTESTINAL TOXICITY	5	1350	1574	18.7984	7.82245	45.1752	1e-05	0.31766	TRUE
3	Reaction	GUILLAIN-BARRE SYNDROME	5	1970	1574	12.8671	5.35705	30.9056	5e-05	0.31766	TRUE
3	Reaction	HAEMOLYTIC ANAEMIA	5	4711	1574	5.37269	2.2383	12.8963	0.0027	0.31766	TRUE
3	Reaction	HYPERCALCAEMIA	5	5321	1574	4.75619	1.98157	11.4159	0.0045	0.31766	TRUE
3	Reaction	HYPERSENSITIVITY	5	70580	1574	0.35826	0.14932	0.85956	0.01019	0.31766	TRUE
3	Reaction	IMMUNE SYSTEM DISORDER	5	4974	1574	5.08833	2.11989	12.2134	0.00339	0.31766	TRUE
3	Reaction	INAPPROPRIATE SCHEDULE OF DRUG ADMINISTRATION	5	53385	1574	0.47366	0.19741	1.13646	0.0889	0.31766	FALSE
3	Reaction	Liver function test increased	5	2374	1574	10.6728	4.44433	25.6302	0.00013	0.31766	TRUE
3	Reaction	MENINGITIS	5	3206	1574	7.89875	3.28995	18.9639	0.0005	0.31766	TRUE
3	Reaction	METASTASES TO LIVER	5	6957	1574	3.63692	1.5154	8.72854	0.01326	0.31766	TRUE
3	Reaction	PEMPHIGOID	5	1923	1574	13.1824	5.48817	31.6638	5e-05	0.31766	TRUE
3	Reaction	PLATELET COUNT DECREASED	5	44607	1574	0.56688	0.23626	1.36013	0.23723	0.31766	FALSE
3	Reaction	Prescribed underdose	5	3555	1574	7.12222	2.96672	17.0984	0.00079	0.31766	TRUE
3	Reaction	Product use issue	5	62976	1574	0.40152	0.16735	0.96336	0.03127	0.31766	TRUE
3	Reaction	RESPIRATORY FAILURE	5	35651	1574	0.70931	0.29562	1.70189	0.57091	0.31766	FALSE
3	Reaction	SINUSITIS	5	42459	1574	0.59556	0.24822	1.42895	0.29885	0.31766	FALSE
3	Reaction	SJOGREN'S SYNDROME	5	1851	1574	13.6966	5.70198	32.9002	4e-05	0.31766	TRUE
3	Reaction	THERAPEUTIC RESPONSE DECREASED	5	25836	1574	0.97882	0.40794	2.34861	1	0.31766	FALSE
3	Reaction	VISION BLURRED	5	61643	1574	0.4102	0.17097	0.9842	0.04174	0.31766	TRUE
3	Reaction	Autoimmune haemolytic anaemia	4	767	1574	26.51	9.93634	70.7281	2e-05	0.25413	TRUE
3	Reaction	BASEDOW'S DISEASE	4	1155	1574	17.5735	6.59252	46.8453	9e-05	0.25413	TRUE
3	Reaction	BLOOD GLUCOSE INCREASED	4	96809	1574	0.20895	0.07852	0.55605	7e-05	0.25413	TRUE
3	Reaction	CARDIAC FAILURE	4	35489	1574	0.57002	0.21419	1.51698	0.34157	0.25413	FALSE
3	Reaction	CARDIOMYOPATHY	4	8125	1574	2.49072	0.93573	6.62974	0.07959	0.25413	FALSE
3	Reaction	CEREBROVASCULAR ACCIDENT	4	99880	1574	0.20252	0.0761	0.53895	4e-05	0.25413	TRUE
3	Reaction	CLOSTRIDIUM DIFFICILE COLITIS	4	4626	1574	4.37627	1.64381	11.6508	0.01415	0.25413	TRUE
3	Reaction	CONJUNCTIVITIS	4	5190	1574	3.90033	1.46511	10.3832	0.02058	0.25413	TRUE
3	Reaction	Clostridium difficile infection	4	6320	1574	3.20252	1.20307	8.52499	0.03815	0.25413	TRUE
3	Reaction	DRY MOUTH	4	36573	1574	0.55312	0.20784	1.47201	0.34552	0.25413	FALSE
3	Reaction	ENDOCRINE DISORDER	4	597	1574	34.1098	12.7755	91.0713	1e-05	0.25413	TRUE
3	Reaction	FAILURE TO THRIVE	4	3215	1574	6.29932	2.36571	16.7736	0.0041	0.25413	TRUE
3	Reaction	HAEMOLYSIS	4	3872	1574	5.22935	1.96408	13.9231	0.00779	0.25413	TRUE
3	Reaction	HAEMORRHAGE INTRACRANIAL	4	7945	1574	2.54717	0.95694	6.78006	0.07473	0.25413	FALSE
3	Reaction	HOT FLUSH	4	28226	1574	0.71671	0.26931	1.90741	0.67119	0.25413	FALSE
3	Reaction	ILEUS	4	6061	1574	3.33946	1.25449	8.88964	0.03355	0.25413	TRUE
3	Reaction	INFLUENZA	4	36645	1574	0.55203	0.20743	1.46912	0.34589	0.25413	FALSE
3	Reaction	ISCHAEMIC STROKE	4	8226	1574	2.46012	0.92424	6.54828	0.08238	0.25413	FALSE
3	Reaction	Immune-mediated adverse reaction	4	38	1574	594.915	211.358	1674.52	0	0.25413	TRUE
3	Reaction	JAUNDICE	4	16246	1574	1.24536	0.46792	3.31447	0.56953	0.25413	FALSE
3	Reaction	LOSS OF CONSCIOUSNESS	4	64076	1574	0.31569	0.11863	0.84013	0.01014	0.25413	TRUE
3	Reaction	LUNG INFECTION	4	11176	1574	1.81052	0.68024	4.81888	0.18243	0.25413	FALSE
3	Reaction	LUNG INFILTRATION	4	6495	1574	3.11618	1.17064	8.29509	0.04145	0.25413	TRUE
3	Reaction	MENTAL STATUS CHANGES	4	15561	1574	1.30019	0.48852	3.46043	0.55762	0.25413	FALSE
3	Reaction	METASTASES TO LYMPH NODES	4	2625	1574	7.71733	2.89784	20.5522	0.00199	0.25413	TRUE
3	Reaction	METASTATIC MALIGNANT MELANOMA	4	896	1574	22.6761	8.50251	60.4771	4e-05	0.25413	TRUE
3	Reaction	MUCOSAL INFLAMMATION	4	10848	1574	1.86528	0.70081	4.96467	0.16978	0.25413	FALSE
3	Reaction	NIGHT SWEATS	4	13184	1574	1.53468	0.57662	4.08461	0.33897	0.25413	FALSE
3	Reaction	OEDEMA	4	26255	1574	0.77053	0.28953	2.05063	0.82486	0.25413	FALSE
3	Reaction	ORGANISING PNEUMONIA	4	1531	1574	13.2463	4.9713	35.2955	0.00027	0.25413	TRUE
3	Reaction	PANCREATITIS ACUTE	4	10199	1574	1.98402	0.74541	5.28077	0.14573	0.25413	FALSE
3	Reaction	PSEUDOMONAS INFECTION	4	3374	1574	6.00211	2.25415	15.9817	0.00485	0.25413	TRUE
3	Reaction	Peripheral swelling	4	38657	1574	0.5233	0.19664	1.39264	0.27114	0.25413	FALSE
3	Reaction	Pneumocystis jirovecii pneumonia	4	2196	1574	9.2277	3.46447	24.5782	0.00104	0.25413	TRUE
3	Reaction	RENAL IMPAIRMENT	4	30153	1574	0.6709	0.2521	1.78549	0.54017	0.25413	FALSE
3	Reaction	SECONDARY ADRENOCORTICAL INSUFFICIENCY	4	295	1574	69.509	25.9451	186.22	0	0.25413	TRUE
3	Reaction	SKIN EXFOLIATION	4	19280	1574	1.04934	0.39428	2.79273	0.79576	0.25413	FALSE
3	Reaction	THYROID FUNCTION TEST ABNORMAL	4	2257	1574	8.97786	3.37075	23.9121	0.00115	0.25413	TRUE
3	Reaction	TUMOUR LYSIS SYNDROME	4	2853	1574	7.09972	2.66609	18.9063	0.00269	0.25413	TRUE
3	Reaction	WHEEZING	4	19150	1574	1.05647	0.39696	2.81169	0.79465	0.25413	FALSE
3	Reaction	WHITE BLOOD CELL COUNT INCREASED	4	21523	1574	0.93997	0.35319	2.5016	1	0.25413	FALSE
3	Reaction	WOUND INFECTION	4	3888	1574	5.2078	1.956	13.8657	0.0079	0.25413	TRUE
3	Reaction	ABASIA	3	26321	1574	0.57642	0.18609	1.78547	0.50505	0.1906	FALSE
3	Reaction	ADRENOCORTICAL INSUFFICIENCY ACUTE	3	595	1574	25.6256	8.24986	79.5976	0.00025	0.1906	TRUE
3	Reaction	ALOPECIA	3	60378	1574	0.25127	0.08112	0.77827	0.00509	0.1906	TRUE
3	Reaction	APHASIA	3	14657	1574	1.03523	0.3342	3.20679	0.76838	0.1906	FALSE
3	Reaction	APLASTIC ANAEMIA	3	2389	1574	6.35806	2.05132	19.7068	0.01235	0.1906	TRUE
3	Reaction	ARRHYTHMIA	3	24398	1574	0.62186	0.20076	1.92622	0.64329	0.1906	FALSE
3	Reaction	AUTOIMMUNE NEUROPATHY	3	35	1574	474.073	145.319	1546.57	0	0.1906	TRUE
3	Reaction	AUTOIMMUNE THYROIDITIS	3	1312	1574	11.5892	3.73689	35.9419	0.00239	0.1906	TRUE
3	Reaction	BLISTER	3	21928	1574	0.69192	0.22338	2.14324	0.80696	0.1906	FALSE
3	Reaction	BLOOD BILIRUBIN INCREASED	3	15988	1574	0.94904	0.30638	2.93975	1	0.1906	FALSE
3	Reaction	BLOOD CALCIUM INCREASED	3	4699	1574	3.23048	1.04262	10.0093	0.06766	0.1906	FALSE
3	Reaction	BLOOD CREATINE PHOSPHOKINASE INCREASED	3	18243	1574	0.83171	0.2685	2.57628	1	0.1906	FALSE
3	Reaction	BLOOD LACTATE DEHYDROGENASE INCREASED	3	10358	1574	1.46502	0.47292	4.53835	0.46511	0.1906	FALSE
3	Reaction	BLOOD PRESSURE INCREASED	3	64593	1574	0.23487	0.07583	0.72748	0.00273	0.1906	TRUE
3	Reaction	BODY TEMPERATURE INCREASED	3	10156	1574	1.49417	0.48233	4.62866	0.45955	0.1906	FALSE
3	Reaction	BRONCHITIS	3	36079	1574	0.42051	0.13576	1.3025	0.13376	0.1906	FALSE
3	Reaction	CARDIOTOXICITY	3	2222	1574	6.83656	2.20558	21.191	0.01018	0.1906	TRUE
3	Reaction	CYSTITIS	3	14476	1574	1.04818	0.33838	3.2469	0.76583	0.1906	FALSE
3	Reaction	DIPLOPIA	3	12115	1574	1.2525	0.40433	3.87991	0.52011	0.1906	FALSE
3	Reaction	DISEASE PROGRESSION	3	46236	1574	0.32813	0.10594	1.01634	0.04349	0.1906	TRUE
3	Reaction	DRUG ERUPTION	3	7594	1574	1.99846	0.64509	6.1912	0.19145	0.1906	FALSE
3	Reaction	DUODENAL ULCER	3	3711	1574	4.09124	1.32031	12.6776	0.03832	0.1906	TRUE
3	Reaction	Drug reaction with eosinophilia and systemic symptoms	3	6783	1574	2.23751	0.72223	6.93196	0.15237	0.1906	FALSE
3	Reaction	ELECTROLYTE IMBALANCE	3	4651	1574	3.26384	1.05339	10.1128	0.06605	0.1906	FALSE
3	Reaction	EPILEPSY	3	12113	1574	1.25271	0.4044	3.88055	0.52005	0.1906	FALSE
3	Reaction	FACE OEDEMA	3	8889	1574	1.70722	0.55109	5.28876	0.25798	0.1906	FALSE
3	Reaction	GASTROINTESTINAL HAEMORRHAGE	3	50253	1574	0.3019	0.09747	0.93509	0.02385	0.1906	TRUE
3	Reaction	HAEMOGLOBIN DECREASED	3	51476	1574	0.29472	0.09515	0.91288	0.01724	0.1906	TRUE
3	Reaction	HAEMOPTYSIS	3	13119	1574	1.15663	0.37338	3.58288	0.74845	0.1906	FALSE
3	Reaction	HEPATITIS ACUTE	3	3112	1574	4.87949	1.57455	15.1214	0.02461	0.1906	TRUE
3	Reaction	HISTIOCYTOSIS HAEMATOPHAGIC	3	2528	1574	6.00805	1.93847	18.6212	0.01435	0.1906	TRUE
3	Reaction	HYPOCALCAEMIA	3	8022	1574	1.8918	0.61066	5.86069	0.21298	0.1906	FALSE
3	Reaction	HYPOMAGNESAEMIA	3	5117	1574	2.96643	0.95743	9.19095	0.08239	0.1906	FALSE
3	Reaction	HYPOPHOSPHATAEMIA	3	2939	1574	5.16701	1.66727	16.013	0.02125	0.1906	TRUE
3	Reaction	ILEUS PARALYTIC	3	2310	1574	6.57578	2.12151	20.3821	0.01129	0.1906	TRUE
3	Reaction	INTESTINAL OBSTRUCTION	3	14310	1574	1.06034	0.3423	3.28458	0.76353	0.1906	FALSE
3	Reaction	KETOACIDOSIS	3	3445	1574	4.40742	1.42229	13.6578	0.03184	0.1906	TRUE
3	Reaction	LARGE INTESTINE PERFORATION	3	3256	1574	4.66349	1.50488	14.4517	0.02761	0.1906	TRUE
3	Reaction	LETHARGY	3	29306	1574	0.51771	0.16714	1.60358	0.3979	0.1906	FALSE
3	Reaction	LYMPHOCYTE COUNT DECREASED	3	6071	1574	2.50005	0.80695	7.74556	0.1205	0.1906	FALSE
3	Reaction	MATERNAL EXPOSURE DURING PREGNANCY	3	19272	1574	0.78729	0.25417	2.43869	1	0.1906	FALSE
3	Reaction	MULTI-ORGAN FAILURE	3	18510	1574	0.81971	0.26463	2.53911	1	0.1906	FALSE
3	Reaction	MUSCLE SPASMS	3	83751	1574	0.18114	0.05848	0.56106	0.0001	0.1906	TRUE
3	Reaction	MUSCULOSKELETAL STIFFNESS	3	33529	1574	0.45249	0.14609	1.40158	0.23625	0.1906	FALSE
3	Reaction	NEPHRITIS	3	1156	1574	13.1573	4.24174	40.8119	0.00167	0.1906	TRUE
3	Reaction	NEURALGIA	3	8871	1574	1.71068	0.55221	5.29949	0.25703	0.1906	FALSE
3	Reaction	OESOPHAGITIS	3	5774	1574	2.62872	0.84847	8.1443	0.10802	0.1906	FALSE
3	Reaction	PAPULE	3	1776	1574	8.55631	2.75987	26.5268	0.00554	0.1906	TRUE
3	Reaction	PERICARDIAL EFFUSION	3	10008	1574	1.51628	0.48947	4.69714	0.45561	0.1906	FALSE
3	Reaction	PERIPHERAL SENSORY NEUROPATHY	3	2332	1574	6.51367	2.10149	20.1894	0.01158	0.1906	TRUE
3	Reaction	PNEUMONIA ASPIRATION	3	10464	1574	1.45018	0.46813	4.49236	0.46811	0.1906	FALSE
3	Reaction	PREMATURE DELIVERY	3	3868	1574	3.92505	1.2667	12.1624	0.04243	0.1906	TRUE
3	Reaction	PRESYNCOPE	3	10517	1574	1.44287	0.46577	4.46971	0.46962	0.1906	FALSE
3	Reaction	PULMONARY OEDEMA	3	21845	1574	0.69455	0.22423	2.15139	0.80672	0.1906	FALSE
3	Reaction	RASH GENERALISED	3	20729	1574	0.73195	0.2363	2.26724	0.8046	0.1906	FALSE
3	Reaction	RASH MACULAR	3	12068	1574	1.25738	0.40591	3.89503	0.51853	0.1906	FALSE
3	Reaction	RASH PRURITIC	3	22582	1574	0.67188	0.21691	2.08116	0.80923	0.1906	FALSE
3	Reaction	RENAL FAILURE ACUTE	3	44749	1574	0.33903	0.10946	1.05012	0.04226	0.1906	TRUE
3	Reaction	RESPIRATORY DISTRESS	3	13758	1574	1.1029	0.35604	3.41641	0.7562	0.1906	FALSE
3	Reaction	SARCOIDOSIS	3	2049	1574	7.41463	2.39192	22.9843	0.00818	0.1906	TRUE
3	Reaction	SHOCK HAEMORRHAGIC	3	3120	1574	4.86697	1.57051	15.0826	0.02477	0.1906	TRUE
3	Reaction	SOMNOLENCE	3	88293	1574	0.17182	0.05547	0.5322	5e-05	0.1906	TRUE
3	Reaction	SPLENOMEGALY	3	5372	1574	2.82554	0.91197	8.75429	0.092	0.1906	FALSE
3	Reaction	STEVENS-JOHNSON SYNDROME	3	13313	1574	1.13977	0.36794	3.53065	0.75071	0.1906	FALSE
3	Reaction	SUDDEN DEATH	3	7176	1574	2.11492	0.68267	6.55208	0.17099	0.1906	FALSE
3	Reaction	SUPRAVENTRICULAR TACHYCARDIA	3	5146	1574	2.94971	0.95204	9.13911	0.08346	0.1906	FALSE
3	Reaction	SWELLING	3	33663	1574	0.45069	0.1455	1.396	0.23696	0.1906	FALSE
3	Reaction	TACHYCARDIA	3	39218	1574	0.38685	0.12489	1.19824	0.1018	0.1906	FALSE
3	Reaction	THROMBOSIS	3	38265	1574	0.39649	0.128	1.22809	0.10091	0.1906	FALSE
3	Reaction	THYROID DISORDER	3	6468	1574	2.34653	0.75741	7.2698	0.13796	0.1906	FALSE
3	Reaction	THYROXINE FREE INCREASED	3	219	1574	70.233	22.4986	219.244	1e-05	0.1906	TRUE
3	Reaction	TOXIC SKIN ERUPTION	3	4499	1574	3.37418	1.08899	10.4548	0.06107	0.1906	FALSE
3	Reaction	UPPER RESPIRATORY TRACT INFECTION	3	19487	1574	0.7786	0.25136	2.41177	1	0.1906	FALSE
3	Reaction	URTICARIA	3	65597	1574	0.23128	0.07467	0.71635	0.00193	0.1906	TRUE
3	Reaction	VASCULITIS	3	5474	1574	2.77286	0.89498	8.59103	0.09596	0.1906	FALSE
3	Reaction	VENTRICULAR ARRHYTHMIA	3	1527	1574	9.95429	3.21029	30.8657	0.00365	0.1906	TRUE
3	Reaction	VERTIGO	3	27119	1574	0.55946	0.18062	1.73292	0.50957	0.1906	FALSE
3	Reaction	VISUAL ACUITY REDUCED	3	25817	1574	0.58768	0.18973	1.82033	0.50319	0.1906	FALSE
3	Reaction	VISUAL IMPAIRMENT	3	40525	1574	0.37437	0.12087	1.15959	0.07581	0.1906	FALSE
3	Reaction	VITILIGO	3	568	1574	26.8501	8.64292	83.4128	0.00022	0.1906	TRUE
3	Reaction	ABDOMINAL DISCOMFORT	2	57474	1574	0.17597	0.04405	0.70303	0.00155	0.12706	TRUE
3	Reaction	ABDOMINAL DISTENSION	2	44765	1574	0.22594	0.05655	0.90264	0.01628	0.12706	TRUE
3	Reaction	ABNORMAL FAECES	2	3007	1574	3.36558	0.84205	13.4517	0.12007	0.12706	FALSE
3	Reaction	ACUTE HEPATIC FAILURE	2	5431	1574	1.86288	0.46618	7.44413	0.29138	0.12706	FALSE
3	Reaction	ACUTE RESPIRATORY DISTRESS SYNDROME	2	8205	1574	1.23291	0.30856	4.92633	0.67961	0.12706	FALSE
3	Reaction	ACUTE RESPIRATORY FAILURE	2	6904	1574	1.46531	0.36671	5.85511	0.3961	0.12706	FALSE
3	Reaction	AGRANULOCYTOSIS	2	6811	1574	1.48532	0.37172	5.9351	0.38967	0.12706	FALSE
3	Reaction	AMPUTATION	2	537	1574	18.9038	4.71961	75.717	0.00524	0.12706	TRUE
3	Reaction	APPETITE DISORDER	2	2201	1574	4.59916	1.1505	18.3853	0.07119	0.12706	FALSE
3	Reaction	ARTERIAL OCCLUSIVE DISEASE	2	4657	1574	2.17262	0.54367	8.68225	0.23511	0.12706	FALSE
3	Reaction	ATRIAL FLUTTER	2	4073	1574	2.48429	0.62164	9.92818	0.19309	0.12706	FALSE
3	Reaction	AUTOIMMUNE ARTHRITIS	2	20	1574	561.864	130.477	2419.51	1e-05	0.12706	TRUE
3	Reaction	AUTOIMMUNE DISORDER	2	2268	1574	4.46318	1.1165	17.8414	0.07495	0.12706	FALSE
3	Reaction	AUTOIMMUNE NEUTROPENIA	2	89	1574	116.248	28.6406	471.831	0.00015	0.12706	TRUE
3	Reaction	Adrenocorticotropic hormone deficiency	2	35	1574	306.471	73.6019	1276.12	2e-05	0.12706	TRUE
3	Reaction	BACTERAEMIA	2	4471	1574	2.26305	0.56629	9.04372	0.22165	0.12706	FALSE
3	Reaction	BASAL CELL CARCINOMA	2	5972	1574	1.69406	0.42395	6.76939	0.33044	0.12706	FALSE
3	Reaction	BLOOD POTASSIUM DECREASED	2	14401	1574	0.70238	0.1758	2.80629	1	0.12706	FALSE
3	Reaction	BONE PAIN	2	26233	1574	0.38556	0.0965	1.54039	0.26259	0.12706	FALSE
3	Reaction	CANCER PAIN	2	687	1574	14.7643	3.68821	59.1032	0.00842	0.12706	TRUE
3	Reaction	CARDIAC ARREST	2	44811	1574	0.2257	0.05649	0.90172	0.01631	0.12706	TRUE
3	Reaction	CARDIAC FAILURE CONGESTIVE	2	58893	1574	0.17173	0.04299	0.68609	0.00163	0.12706	TRUE
3	Reaction	CARDIAC PACEMAKER INSERTION	2	3308	1574	3.05915	0.76542	12.2265	0.13996	0.12706	FALSE
3	Reaction	CARDIOMEGALY	2	8696	1574	1.16328	0.29114	4.64807	0.69186	0.12706	FALSE
3	Reaction	CEREBRAL THROMBOSIS	2	1635	1574	6.19324	1.54892	24.7631	0.04221	0.12706	TRUE
3	Reaction	CHEST DISCOMFORT	2	42857	1574	0.23599	0.05907	0.94283	0.02258	0.12706	TRUE
3	Reaction	CHOLELITHIASIS	2	19137	1574	0.52854	0.13229	2.11167	0.6001	0.12706	FALSE
3	Reaction	COAGULOPATHY	2	9243	1574	1.09442	0.27391	4.37289	0.70607	0.12706	FALSE
3	Reaction	COLD SWEAT	2	8753	1574	1.1557	0.28924	4.61779	0.69332	0.12706	FALSE
3	Reaction	COMA	2	21922	1574	0.46138	0.11548	1.84336	0.46156	0.12706	FALSE
3	Reaction	CONDITION AGGRAVATED	2	89912	1574	0.11249	0.02816	0.44939	1e-05	0.12706	TRUE
3	Reaction	DERMATOMYOSITIS	2	867	1574	11.692	2.92195	46.7846	0.0131	0.12706	TRUE
3	Reaction	DIABETES INSIPIDUS	2	1031	1574	9.82853	2.45688	39.3181	0.01814	0.12706	TRUE
3	Reaction	DIABETES MELLITUS INADEQUATE CONTROL	2	8118	1574	1.24613	0.31187	4.97915	0.6775	0.12706	FALSE
3	Reaction	DIABETIC COMA	2	2112	1574	4.79315	1.19899	19.1613	0.06629	0.12706	FALSE
3	Reaction	DISEASE RECURRENCE	2	10341	1574	0.97819	0.24482	3.90843	1	0.12706	FALSE
3	Reaction	DUODENITIS	2	1692	1574	5.98435	1.49673	23.9272	0.04488	0.12706	TRUE
3	Reaction	DYSARTHRIA	2	19129	1574	0.52876	0.13234	2.11255	0.60005	0.12706	FALSE
3	Reaction	DYSSTASIA	2	13538	1574	0.74716	0.187	2.98522	1	0.12706	FALSE
3	Reaction	DYSURIA	2	17906	1574	0.56488	0.14138	2.25687	0.59519	0.12706	FALSE
3	Reaction	Drug effect incomplete	2	20916	1574	0.48358	0.12104	1.93203	0.45469	0.12706	FALSE
3	Reaction	EMBOLISM	2	4622	1574	2.18908	0.54779	8.74805	0.23257	0.12706	FALSE
3	Reaction	ENTEROCOLITIS INFECTIOUS	2	602	1574	16.8559	4.2095	67.4954	0.00653	0.12706	TRUE
3	Reaction	EOSINOPHIL COUNT INCREASED	2	3066	1574	3.30077	0.82585	13.1926	0.12391	0.12706	FALSE
3	Reaction	EXTREMITY NECROSIS	2	831	1574	12.1997	3.04863	48.8196	0.01209	0.12706	TRUE
3	Reaction	EYE PAIN	2	19585	1574	0.51645	0.12926	2.06336	0.60323	0.12706	FALSE
3	Reaction	FEBRILE NEUTROPENIA	2	24262	1574	0.41688	0.10434	1.66555	0.2551	0.12706	FALSE
3	Reaction	FEELING ABNORMAL	2	113480	1574	0.08912	0.02231	0.35605	0	0.12706	TRUE
3	Reaction	FEELING COLD	2	12953	1574	0.78091	0.19545	3.12008	1	0.12706	FALSE
3	Reaction	FUNCTIONAL GASTROINTESTINAL DISORDER	2	1299	1574	7.79765	1.94976	31.1851	0.02782	0.12706	TRUE
3	Reaction	Facial paralysis	2	1415	1574	7.15751	1.78985	28.6224	0.03252	0.12706	TRUE
3	Reaction	GASTRIC DISORDER	2	16456	1574	0.61466	0.15384	2.45577	0.77799	0.12706	FALSE
3	Reaction	GASTROINTESTINAL PERFORATION	2	2040	1574	4.96249	1.24132	19.8387	0.06241	0.12706	FALSE
3	Reaction	Generalised tonic-clonic seizure	2	3959	1574	2.55586	0.63954	10.2143	0.185	0.12706	FALSE
3	Reaction	HAEMATOCHEZIA	2	18841	1574	0.53684	0.13437	2.14485	0.5984	0.12706	FALSE
3	Reaction	HAEMATURIA	2	17114	1574	0.59102	0.14793	2.36133	0.78075	0.12706	FALSE
3	Reaction	HAEMODIALYSIS	2	7742	1574	1.30666	0.32701	5.22107	0.66869	0.12706	FALSE
3	Reaction	HAEMOGLOBIN ABNORMAL	2	2303	1574	4.39529	1.09953	17.5698	0.07694	0.12706	FALSE
3	Reaction	HEMIPARESIS	2	9292	1574	1.08865	0.27246	4.34983	0.70737	0.12706	FALSE
3	Reaction	HEMIPLEGIA	2	4562	1574	2.21788	0.55499	8.86319	0.22823	0.12706	FALSE
3	Reaction	HERPES ZOSTER	2	22793	1574	0.44375	0.11107	1.77291	0.34191	0.12706	FALSE
3	Reaction	HYPERBILIRUBINAEMIA	2	4405	1574	2.29697	0.57478	9.17933	0.21688	0.12706	FALSE
3	Reaction	HYPERURICAEMIA	2	2060	1574	4.91426	1.22927	19.6458	0.06348	0.12706	FALSE
3	Reaction	HYPOALBUMINAEMIA	2	3484	1574	2.90452	0.72675	11.6082	0.1519	0.12706	FALSE
3	Reaction	HYPOGLYCAEMIA	2	25092	1574	0.40309	0.10089	1.61045	0.25653	0.12706	FALSE
3	Reaction	HYPOTHALAMO-PITUITARY DISORDER	2	466	1574	21.7965	5.43964	87.3376	0.00398	0.12706	TRUE
3	Reaction	Hypersensitivity vasculitis	2	1113	1574	9.10311	2.27577	36.4125	0.02091	0.12706	TRUE
3	Reaction	IMPAIRED GASTRIC EMPTYING	2	3145	1574	3.2178	0.8051	12.8609	0.1291	0.12706	FALSE
3	Reaction	INCREASED APPETITE	2	7607	1574	1.32986	0.33282	5.31377	0.66566	0.12706	FALSE
3	Reaction	INFLAMMATION	2	17032	1574	0.59387	0.14864	2.3727	0.78036	0.12706	FALSE
3	Reaction	INTERNATIONAL NORMALISED RATIO INCREASED	2	21381	1574	0.47306	0.1184	1.89001	0.45738	0.12706	FALSE
3	Reaction	INTRACRANIAL PRESSURE INCREASED	2	2533	1574	3.99587	0.99967	15.9723	0.09041	0.12706	FALSE
3	Reaction	IRRITABILITY	2	32837	1574	0.30801	0.0771	1.23056	0.07628	0.12706	FALSE
3	Reaction	KIDNEY FIBROSIS	2	796	1574	12.7375	3.18278	50.9754	0.01114	0.12706	TRUE
3	Reaction	LACTIC ACIDOSIS	2	10173	1574	0.99435	0.24886	3.973	1	0.12706	FALSE
3	Reaction	LEUKOCYTOSIS	2	8781	1574	1.15202	0.28832	4.60306	0.69404	0.12706	FALSE
3	Reaction	LICHENOID KERATOSIS	2	741	1574	13.6855	3.41921	54.7763	0.00972	0.12706	TRUE
3	Reaction	LUNG OPERATION	2	346	1574	29.3999	7.32957	117.927	0.00223	0.12706	TRUE
3	Reaction	LYMPHADENOPATHY	2	16159	1574	0.62596	0.15667	2.50092	0.77708	0.12706	FALSE
3	Reaction	LYMPHOCYTE COUNT INCREASED	2	1259	1574	8.04579	2.01174	32.1785	0.02626	0.12706	TRUE
3	Reaction	LYMPHOEDEMA	2	2531	1574	3.99903	1.00046	15.985	0.09029	0.12706	FALSE
3	Reaction	MALNUTRITION	2	5243	1574	1.9297	0.4829	7.71123	0.27772	0.12706	FALSE
3	Reaction	MEDIASTINAL HAEMORRHAGE	2	71	1574	146.573	35.9641	597.365	0.0001	0.12706	TRUE
3	Reaction	MENINGITIS BACTERIAL	2	664	1574	15.2773	3.81608	61.1609	0.00789	0.12706	TRUE
3	Reaction	METASTASES TO MENINGES	2	686	1574	14.7859	3.69359	59.1897	0.00839	0.12706	TRUE
3	Reaction	METASTASIS	2	3050	1574	3.3181	0.83018	13.2619	0.12286	0.12706	FALSE
3	Reaction	MOBILITY DECREASED	2	28082	1574	0.36017	0.09015	1.43895	0.19454	0.12706	FALSE
3	Reaction	MOOD ALTERED	2	13097	1574	0.77232	0.1933	3.08577	1	0.12706	FALSE
3	Reaction	MUCOCUTANEOUS RASH	2	61	1574	171.416	41.9189	700.961	7e-05	0.12706	TRUE
3	Reaction	MYASTHENIA GRAVIS	2	1629	1574	6.21608	1.55463	24.8545	0.04194	0.12706	TRUE
3	Reaction	MYOPATHY	2	4086	1574	2.47638	0.61966	9.89656	0.19401	0.12706	FALSE
3	Reaction	NECK PAIN	2	24676	1574	0.40989	0.10259	1.6376	0.25548	0.12706	FALSE
3	Reaction	NEOPLASM	2	4792	1574	2.11139	0.52835	8.43748	0.24491	0.12706	FALSE
3	Reaction	NEOPLASM PROGRESSION	2	8214	1574	1.23156	0.30822	4.92093	0.67983	0.12706	FALSE
3	Reaction	NEPHRITIS AUTOIMMUNE	2	27	1574	404.542	95.8998	1706.51	1e-05	0.12706	TRUE
3	Reaction	NERVOUS SYSTEM DISORDER	2	21102	1574	0.47932	0.11997	1.915	0.45566	0.12706	FALSE
3	Reaction	NEUTROPHIL COUNT DECREASED	2	14417	1574	0.7016	0.1756	2.80317	1	0.12706	FALSE
3	Reaction	ORAL HERPES	2	6549	1574	1.54476	0.38659	6.17266	0.3714	0.12706	FALSE
3	Reaction	ORAL PAIN	2	10228	1574	0.989	0.24753	3.95163	1	0.12706	FALSE
3	Reaction	OROPHARYNGEAL PAIN	2	36281	1574	0.27877	0.06978	1.11374	0.05727	0.12706	FALSE
3	Reaction	PAPILLOEDEMA	2	2190	1574	4.62228	1.15628	18.4778	0.07057	0.12706	FALSE
3	Reaction	PARALYSIS	2	7185	1574	1.40798	0.35237	5.62601	0.65672	0.12706	FALSE
3	Reaction	PERICARDITIS	2	3796	1574	2.66567	0.667	10.6533	0.17352	0.12706	FALSE
3	Reaction	PERIPHERAL MOTOR NEUROPATHY	2	647	1574	15.6799	3.91645	62.7764	0.0075	0.12706	TRUE
3	Reaction	PITUITARY ENLARGEMENT	2	104	1574	99.1525	24.4855	401.512	0.00021	0.12706	TRUE
3	Reaction	PLASMAPHERESIS	2	276	1574	36.9108	9.19264	148.206	0.00143	0.12706	TRUE
3	Reaction	PLATELET COUNT INCREASED	2	5580	1574	1.81311	0.45373	7.24523	0.30218	0.12706	FALSE
3	Reaction	PLATELET TRANSFUSION	2	348	1574	29.2299	7.28737	117.242	0.00225	0.12706	TRUE
3	Reaction	PRERENAL FAILURE	2	437	1574	23.2495	5.80113	93.1787	0.00352	0.12706	TRUE
3	Reaction	PRODUCTIVE COUGH	2	15106	1574	0.66959	0.16759	2.67529	1	0.12706	FALSE
3	Reaction	PULMONARY THROMBOSIS	2	3928	1574	2.57605	0.64459	10.295	0.1828	0.12706	FALSE
3	Reaction	PYELONEPHRITIS	2	3661	1574	2.76402	0.6916	11.0465	0.1641	0.12706	FALSE
3	Reaction	Probiotic therapy	2	26	1574	421.398	99.6739	1781.57	1e-05	0.12706	TRUE
3	Reaction	Product use in unapproved indication	2	7439	1574	1.3599	0.34033	5.43383	0.662	0.12706	FALSE
3	Reaction	RECTAL HAEMORRHAGE	2	21698	1574	0.46615	0.11667	1.86239	0.45969	0.12706	FALSE
3	Reaction	RED BLOOD CELL COUNT DECREASED	2	11980	1574	0.84434	0.21132	3.37356	1	0.12706	FALSE
3	Reaction	RESPIRATORY TRACT CONGESTION	2	7293	1574	1.38713	0.34715	5.54266	0.65892	0.12706	FALSE
3	Reaction	RHEUMATOID ARTHRITIS	2	35355	1574	0.28607	0.0716	1.14291	0.05603	0.12706	FALSE
3	Reaction	SCIATICA	2	5501	1574	1.83916	0.46025	7.34934	0.29645	0.12706	FALSE
3	Reaction	SINUS BRADYCARDIA	2	5015	1574	2.01747	0.50486	8.06204	0.26113	0.12706	FALSE
3	Reaction	SINUS TACHYCARDIA	2	7436	1574	1.36045	0.34047	5.43602	0.66193	0.12706	FALSE
3	Reaction	SINUSITIS NONINFECTIVE	2	12	1574	1011.36	221.77	4612.16	0	0.12706	TRUE
3	Reaction	SKIN LESION	2	10785	1574	0.93792	0.23474	3.74748	1	0.12706	FALSE
3	Reaction	SKIN TOXICITY	2	1630	1574	6.21226	1.55368	24.8392	0.04198	0.12706	TRUE
3	Reaction	SPINAL COMPRESSION FRACTURE	2	4026	1574	2.51331	0.62889	10.0442	0.18975	0.12706	FALSE
3	Reaction	STOMATITIS	2	22411	1574	0.45132	0.11296	1.80313	0.34098	0.12706	FALSE
3	Reaction	STRESS CARDIOMYOPATHY	2	1793	1574	5.64688	1.41239	22.5769	0.04975	0.12706	TRUE
3	Reaction	SURFACTANT PROTEIN INCREASED	2	30	1574	361.198	86.1169	1514.97	2e-05	0.12706	TRUE
3	Reaction	SURGERY	2	20902	1574	0.4839	0.12112	1.93333	0.45462	0.12706	FALSE
3	Reaction	SYSTEMIC INFLAMMATORY RESPONSE SYNDROME	2	1840	1574	5.50248	1.3763	21.9991	0.05208	0.12706	FALSE
3	Reaction	THIRST	2	7503	1574	1.34829	0.33743	5.38746	0.66338	0.12706	FALSE
3	Reaction	THYROTOXIC CRISIS	2	322	1574	31.6049	7.87691	126.81	0.00194	0.12706	TRUE
3	Reaction	THYROXINE FREE DECREASED	2	184	1574	55.569	13.8043	223.693	0.00064	0.12706	TRUE
3	Reaction	TINNITUS	2	21112	1574	0.47909	0.11991	1.91409	0.45572	0.12706	FALSE
3	Reaction	TYPE 2 DIABETES MELLITUS	2	19756	1574	0.51198	0.12814	2.04549	0.60459	0.12706	FALSE
3	Reaction	UROSEPSIS	2	3885	1574	2.60457	0.65172	10.409	0.17977	0.12706	FALSE
3	Reaction	VIRAL INFECTION	2	13985	1574	0.72328	0.18103	2.88978	1	0.12706	FALSE
3	Reaction	VIRAL UPPER RESPIRATORY TRACT INFECTION	2	3973	1574	2.54685	0.63728	10.1783	0.18599	0.12706	FALSE
3	Reaction	VOGT-KOYANAGI-HARADA SYNDROME	2	90	1574	114.927	28.3202	466.386	0.00015	0.12706	TRUE
3	Reaction	WHITE BLOOD CELL COUNT DECREASED	2	42540	1574	0.23775	0.05951	0.94986	0.02225	0.12706	TRUE
3	Reaction	ABDOMINAL TENDERNESS	1	2675	1574	1.89109	0.26644	13.422	0.41082	0.06353	FALSE
3	Reaction	ACHROMOTRICHIA ACQUIRED	1	11	1574	505.678	64.7691	3948.03	0.00217	0.06353	TRUE
3	Reaction	ACIDOSIS	1	3983	1574	1.26991	0.17894	9.0121	0.54514	0.06353	FALSE
3	Reaction	ACNE	1	13731	1574	0.3683	0.05191	2.61325	0.5348	0.06353	FALSE
3	Reaction	ACOUSTIC NEURITIS	1	16	1574	337.119	44.5565	2550.67	0.00316	0.06353	TRUE
3	Reaction	ACQUIRED EPIDERMOLYSIS BULLOSA	1	52	1574	99.1525	13.7104	717.064	0.01023	0.06353	TRUE
3	Reaction	ACTIVATED PARTIAL THROMBOPLASTIN TIME PROLONGED	1	3712	1574	1.36265	0.19201	9.6704	0.52009	0.06353	FALSE
3	Reaction	ACUTE PULMONARY OEDEMA	1	3163	1574	1.59923	0.22534	11.3499	0.46504	0.06353	FALSE
3	Reaction	ADRENAL DISORDER	1	796	1574	6.36073	0.89542	45.1844	0.14564	0.06353	FALSE
3	Reaction	ADRENAL HAEMORRHAGE	1	259	1574	19.5999	2.75207	139.588	0.04992	0.06353	TRUE
3	Reaction	ADRENAL NEOPLASM	1	259	1574	19.5999	2.75207	139.588	0.04992	0.06353	TRUE
3	Reaction	AGEUSIA	1	11044	1574	0.45792	0.06454	3.24917	0.73128	0.06353	FALSE
3	Reaction	ALTERED STATE OF CONSCIOUSNESS	1	8431	1574	0.59985	0.08454	4.25641	1	0.06353	FALSE
3	Reaction	AMNESIA	1	33736	1574	0.1499	0.02113	1.06354	0.01823	0.06353	TRUE
3	Reaction	ANAPHYLACTIC REACTION	1	20562	1574	0.24594	0.03466	1.74501	0.20392	0.06353	FALSE
3	Reaction	ANGINA PECTORIS	1	16601	1574	0.30463	0.04293	2.16141	0.39448	0.06353	FALSE
3	Reaction	ANTI-THYROID ANTIBODY POSITIVE	1	226	1574	22.4746	3.15395	160.15	0.0437	0.06353	TRUE
3	Reaction	ANTIPHOSPHOLIPID SYNDROME	1	654	1574	7.74392	1.08984	55.0249	0.12131	0.06353	FALSE
3	Reaction	ANXIETY	1	129403	1574	0.03908	0.00551	0.27726	0	0.06353	TRUE
3	Reaction	APPENDICITIS	1	3683	1574	1.37338	0.19352	9.74658	0.51733	0.06353	FALSE
3	Reaction	ARACHNOIDITIS	1	428	1574	11.8426	1.66534	84.2149	0.08115	0.06353	FALSE
3	Reaction	ARTERIAL THROMBOSIS	1	1170	1574	4.32573	0.60918	30.7164	0.20655	0.06353	FALSE
3	Reaction	ARTHROPATHY	1	21035	1574	0.24041	0.03388	1.70576	0.14121	0.06353	FALSE
3	Reaction	ASTERIXIS	1	642	1574	7.88889	1.11021	56.0566	0.11922	0.06353	FALSE
3	Reaction	ASTHENOPIA	1	2356	1574	2.14725	0.30252	15.2409	0.37245	0.06353	FALSE
3	Reaction	ASTHMA	1	33594	1574	0.15053	0.02122	1.06803	0.01818	0.06353	TRUE
3	Reaction	ATAXIA	1	5991	1574	0.8442	0.11897	5.99052	1	0.06353	FALSE
3	Reaction	ATELECTASIS	1	6205	1574	0.81508	0.11486	5.78385	1	0.06353	FALSE
3	Reaction	ATRIAL THROMBOSIS	1	1010	1574	5.01167	0.70569	35.5919	0.18104	0.06353	FALSE
3	Reaction	ATRIOVENTRICULAR BLOCK	1	3776	1574	1.33954	0.18875	9.50641	0.52613	0.06353	FALSE
3	Reaction	ATRIOVENTRICULAR BLOCK COMPLETE	1	3351	1574	1.50949	0.21269	10.7128	0.48457	0.06353	FALSE
3	Reaction	ATRIOVENTRICULAR BLOCK SECOND DEGREE	1	1695	1574	2.98511	0.4205	21.1913	0.2848	0.06353	FALSE
3	Reaction	AUTOIMMUNE INNER EAR DISEASE	1	11	1574	505.678	64.7691	3948.03	0.00217	0.06353	TRUE
3	Reaction	AUTOIMMUNE MYOCARDITIS	1	26	1574	202.271	27.4236	1491.91	0.00513	0.06353	TRUE
3	Reaction	AXILLARY MASS	1	504	1574	10.0532	1.41421	71.4659	0.09486	0.06353	FALSE
3	Reaction	Adenocarcinoma gastric	1	252	1574	20.1465	2.82852	143.497	0.04861	0.06353	TRUE
3	Reaction	Aphthous ulcer	1	1034	1574	4.89523	0.68931	34.7642	0.18492	0.06353	FALSE
3	Reaction	Autoimmune nephritis	1	16	1574	337.119	44.5565	2550.67	0.00316	0.06353	TRUE
3	Reaction	BALANCE DISORDER	1	40220	1574	0.12573	0.01772	0.89207	0.00652	0.06353	TRUE
3	Reaction	BENIGN PROSTATIC HYPERPLASIA	1	2960	1574	1.70895	0.24079	12.1288	0.44312	0.06353	FALSE
3	Reaction	BILE DUCT OBSTRUCTION	1	1419	1574	3.56613	0.50229	25.3189	0.24468	0.06353	FALSE
3	Reaction	BILIARY CIRRHOSIS PRIMARY	1	370	1574	13.704	1.92641	97.4871	0.07055	0.06353	FALSE
3	Reaction	BIOPSY	1	443	1574	11.4407	1.60895	81.3506	0.08387	0.06353	FALSE
3	Reaction	BIOPSY LIVER	1	268	1574	18.9392	2.65964	134.866	0.05161	0.06353	FALSE
3	Reaction	BLADDER IRRITATION	1	255	1574	19.9086	2.79524	141.795	0.04917	0.06353	TRUE
3	Reaction	BLINDNESS	1	16703	1574	0.30276	0.04267	2.14821	0.39569	0.06353	FALSE
3	Reaction	BLOOD ALBUMIN DECREASED	1	4898	1574	1.03263	0.14552	7.32786	0.62046	0.06353	FALSE
3	Reaction	BLOOD ANTIDIURETIC HORMONE ABNORMAL	1	15	1574	361.198	47.5241	2745.23	0.00296	0.06353	TRUE
3	Reaction	BLOOD CALCIUM DECREASED	1	5428	1574	0.93178	0.13131	6.6121	1	0.06353	FALSE
3	Reaction	BLOOD CORTICOTROPHIN ABNORMAL	1	47	1574	109.93	15.1692	796.651	0.00925	0.06353	TRUE
3	Reaction	BLOOD CREATININE ABNORMAL	1	1274	1574	3.97233	0.55945	28.205	0.2227	0.06353	FALSE
3	Reaction	BLOOD ELECTROLYTES ABNORMAL	1	724	1574	6.99416	0.98446	49.6902	0.13339	0.06353	FALSE
3	Reaction	BLOOD GLUCOSE FLUCTUATION	1	5945	1574	0.85074	0.11989	6.03689	1	0.06353	FALSE
3	Reaction	BLOOD POTASSIUM INCREASED	1	8249	1574	0.61309	0.0864	4.35034	1	0.06353	FALSE
3	Reaction	BLOOD PROLACTIN ABNORMAL	1	186	1574	27.3339	3.83228	194.961	0.03611	0.06353	TRUE
3	Reaction	BLOOD TESTOSTERONE DECREASED	1	4790	1574	1.05592	0.1488	7.49315	0.61227	0.06353	FALSE
3	Reaction	BLOOD THYROID STIMULATING HORMONE	1	49	1574	105.35	14.55	762.787	0.00964	0.06353	TRUE
3	Reaction	BLOOD THYROID STIMULATING HORMONE ABNORMAL	1	651	1574	7.77966	1.09486	55.2792	0.12079	0.06353	FALSE
3	Reaction	BONE DISORDER	1	11361	1574	0.44514	0.06274	3.15849	0.73291	0.06353	FALSE
3	Reaction	BONE MARROW FAILURE	1	10233	1574	0.49421	0.06965	3.50672	0.72917	0.06353	FALSE
3	Reaction	BRAIN CANCER METASTATIC	1	216	1574	23.5199	3.29998	167.633	0.04181	0.06353	TRUE
3	Reaction	BRAIN HERNIATION	1	1438	1574	3.51898	0.49565	24.9839	0.24751	0.06353	FALSE
3	Reaction	BRAIN NEOPLASM	1	3811	1574	1.32724	0.18702	9.41905	0.5294	0.06353	FALSE
3	Reaction	BRAIN OPERATION	1	778	1574	6.50808	0.91613	46.2325	0.1426	0.06353	FALSE
3	Reaction	BREAST PAIN	1	5514	1574	0.91725	0.12926	6.50893	1	0.06353	FALSE
3	Reaction	CAESAREAN SECTION	1	8826	1574	0.57301	0.08075	4.06588	1	0.06353	FALSE
3	Reaction	CARDIAC DISORDER	1	47871	1574	0.10564	0.01489	0.74949	0.00158	0.06353	TRUE
3	Reaction	CARDIO-RESPIRATORY ARREST	1	24123	1574	0.20963	0.02955	1.48739	0.10249	0.06353	FALSE
3	Reaction	CARDIOGENIC SHOCK	1	5331	1574	0.94874	0.1337	6.73245	1	0.06353	FALSE
3	Reaction	CARDIOVASCULAR DISORDER	1	20461	1574	0.24715	0.03483	1.75362	0.20318	0.06353	FALSE
3	Reaction	CAUDA EQUINA SYNDROME	1	371	1574	13.667	1.92121	97.2229	0.07074	0.06353	FALSE
3	Reaction	CELL DEATH	1	756	1574	6.69772	0.94279	47.5814	0.13886	0.06353	FALSE
3	Reaction	CENTRAL NERVOUS SYSTEM HAEMORRHAGE	1	158	1574	32.2088	4.51149	229.947	0.03076	0.06353	TRUE
3	Reaction	CEREBRAL INFARCTION	1	12695	1574	0.39836	0.05614	2.82654	0.52944	0.06353	FALSE
3	Reaction	CHOLECYSTITIS ACUTE	1	3152	1574	1.60482	0.22612	11.3896	0.46387	0.06353	FALSE
3	Reaction	CHONDROCALCINOSIS	1	204	1574	24.9102	3.49411	177.59	0.03954	0.06353	TRUE
3	Reaction	CHORIORETINITIS	1	154	1574	33.0508	4.62869	235.997	0.02999	0.06353	TRUE
3	Reaction	CHROMATURIA	1	11405	1574	0.44342	0.06249	3.1463	0.73317	0.06353	FALSE
3	Reaction	CHRONIC OBSTRUCTIVE PULMONARY DISEASE	1	24539	1574	0.20608	0.02904	1.46217	0.10403	0.06353	FALSE
3	Reaction	CIRCULATORY COLLAPSE	1	9635	1574	0.52489	0.07397	3.72442	1	0.06353	FALSE
3	Reaction	CIRCUMSTANCE OR INFORMATION CAPABLE OF LEADING TO MEDICATION ERROR	1	8064	1574	0.62716	0.08838	4.45017	1	0.06353	FALSE
3	Reaction	CLAVICLE FRACTURE	1	1658	1574	3.05177	0.42988	21.6648	0.27955	0.06353	FALSE
3	Reaction	COGNITIVE DISORDER	1	19295	1574	0.26209	0.03694	1.8596	0.19783	0.06353	FALSE
3	Reaction	COLECTOMY	1	2190	1574	2.31009	0.32545	16.3972	0.3515	0.06353	FALSE
3	Reaction	COLONY STIMULATING FACTOR THERAPY	1	53	1574	97.2457	13.4517	703.017	0.01043	0.06353	TRUE
3	Reaction	CONDUCTION DISORDER	1	985	1574	5.139	0.7236	36.4971	0.17699	0.06353	FALSE
3	Reaction	COOMBS TEST POSITIVE	1	221	1574	22.9854	3.22531	163.806	0.04276	0.06353	TRUE
3	Reaction	CORONARY ARTERY DISEASE	1	24138	1574	0.2095	0.02953	1.48647	0.10254	0.06353	FALSE
3	Reaction	CRANIAL NERVE DISORDER	1	342	1574	14.8293	2.08413	105.515	0.06539	0.06353	FALSE
3	Reaction	CYANOSIS	1	8830	1574	0.57275	0.08072	4.06403	1	0.06353	FALSE
3	Reaction	CYTOMEGALOVIRUS INFECTION	1	5907	1574	0.85621	0.12066	6.07574	1	0.06353	FALSE
3	Reaction	CYTOMEGALOVIRUS TEST POSITIVE	1	833	1574	6.07786	0.85564	43.1727	0.15187	0.06353	FALSE
3	Reaction	Cancer surgery	1	321	1574	15.8024	2.22048	112.46	0.0615	0.06353	FALSE
3	Reaction	Chorioretinal folds	1	17	1574	316.049	41.9374	2381.8	0.00336	0.06353	TRUE
3	Reaction	DEAFNESS	1	10435	1574	0.48464	0.0683	3.43883	0.7294	0.06353	FALSE
3	Reaction	DEAFNESS BILATERAL	1	735	1574	6.88934	0.96973	48.9445	0.13527	0.06353	FALSE
3	Reaction	DECREASED ACTIVITY	1	3752	1574	1.34811	0.18996	9.56725	0.52388	0.06353	FALSE
3	Reaction	DELIRIUM	1	14437	1574	0.35029	0.04937	2.48544	0.54182	0.06353	FALSE
3	Reaction	DEMYELINATING POLYNEUROPATHY	1	504	1574	10.0532	1.41421	71.4659	0.09486	0.06353	FALSE
3	Reaction	DEMYELINATION	1	2139	1574	2.36519	0.33321	16.7885	0.34493	0.06353	FALSE
3	Reaction	DEPRESSED LEVEL OF CONSCIOUSNESS	1	18667	1574	0.27091	0.03818	1.92217	0.28509	0.06353	FALSE
3	Reaction	DEPRESSED MOOD	1	21069	1574	0.24002	0.03383	1.70301	0.14122	0.06353	FALSE
3	Reaction	DEPRESSION	1	119965	1574	0.04215	0.00594	0.29907	0	0.06353	TRUE
3	Reaction	DEPRESSIVE SYMPTOM	1	1357	1574	3.72919	0.52523	26.4774	0.23536	0.06353	FALSE
3	Reaction	DERMATITIS EXFOLIATIVE	1	4152	1574	1.21821	0.17166	8.64511	0.5601	0.06353	FALSE
3	Reaction	DEVICE RELATED INFECTION	1	8072	1574	0.62654	0.0883	4.44576	1	0.06353	FALSE
3	Reaction	DIALYSIS	1	8343	1574	0.60618	0.08543	4.30132	1	0.06353	FALSE
3	Reaction	DIFFUSE ALVEOLAR DAMAGE	1	582	1574	8.70358	1.22467	61.8553	0.10871	0.06353	FALSE
3	Reaction	DISORIENTATION	1	22101	1574	0.22881	0.03225	1.62348	0.14362	0.06353	FALSE
3	Reaction	DRUG INTERACTION	1	70743	1574	0.07148	0.01007	0.50716	2e-05	0.06353	TRUE
3	Reaction	DRUG INTOLERANCE	1	23056	1574	0.21934	0.03091	1.55623	0.10075	0.06353	FALSE
3	Reaction	DRUG PRESCRIBING ERROR	1	15356	1574	0.32932	0.04641	2.33668	0.38417	0.06353	FALSE
3	Reaction	DRUG RESISTANCE	1	6582	1574	0.76839	0.10829	5.45247	1	0.06353	FALSE
3	Reaction	DRUG TOLERANCE DECREASED	1	567	1574	8.93424	1.25707	63.4974	0.10606	0.06353	FALSE
3	Reaction	DRY EYE	1	12904	1574	0.39191	0.05523	2.78076	0.53001	0.06353	FALSE
3	Reaction	DRY SKIN	1	22794	1574	0.22186	0.03127	1.57412	0.14732	0.06353	FALSE
3	Reaction	DYSAESTHESIA	1	1382	1574	3.66168	0.51573	25.9977	0.23913	0.06353	FALSE
3	Reaction	DYSCHEZIA	1	271	1574	18.7288	2.6302	133.362	0.05218	0.06353	FALSE
3	Reaction	DYSPEPSIA	1	43861	1574	0.11529	0.01625	0.81802	0.00319	0.06353	TRUE
3	Reaction	DYSPHONIA	1	23687	1574	0.21349	0.03009	1.51477	0.10139	0.06353	FALSE
3	Reaction	DYSTONIA	1	12625	1574	0.40057	0.05645	2.84222	0.52932	0.06353	FALSE
3	Reaction	EAR INFECTION	1	9209	1574	0.54917	0.0774	3.89674	1	0.06353	FALSE
3	Reaction	EAR PAIN	1	8282	1574	0.61065	0.08606	4.333	1	0.06353	FALSE
3	Reaction	EATING DISORDER	1	9050	1574	0.55882	0.07876	3.96522	1	0.06353	FALSE
3	Reaction	ECZEMA	1	8174	1574	0.61872	0.0872	4.39027	1	0.06353	FALSE
3	Reaction	ECZEMA ASTEATOTIC	1	181	1574	28.0932	3.93815	200.406	0.03516	0.06353	TRUE
3	Reaction	EJACULATION FAILURE	1	1347	1574	3.75689	0.52913	26.6742	0.23385	0.06353	FALSE
3	Reaction	EJECTION FRACTION DECREASED	1	6392	1574	0.79123	0.1115	5.61459	1	0.06353	FALSE
3	Reaction	ELECTROCARDIOGRAM ABNORMAL	1	4493	1574	1.12573	0.15863	7.98869	0.5888	0.06353	FALSE
3	Reaction	EMBOLISM VENOUS	1	1116	1574	4.53523	0.63866	32.2053	0.19803	0.06353	FALSE
3	Reaction	EMPHYSEMA	1	5474	1574	0.92395	0.1302	6.55651	1	0.06353	FALSE
3	Reaction	ENCEPHALITIS AUTOIMMUNE	1	146	1574	34.8743	4.88234	249.106	0.02846	0.06353	TRUE
3	Reaction	ENDOCARDITIS	1	2281	1574	2.21788	0.31247	15.7424	0.36307	0.06353	FALSE
3	Reaction	ENERGY INCREASED	1	2920	1574	1.73237	0.24409	12.2951	0.4387	0.06353	FALSE
3	Reaction	ENTEROCOCCAL SEPSIS	1	434	1574	11.6785	1.64232	83.0453	0.08224	0.06353	FALSE
3	Reaction	EPIDIDYMITIS	1	543	1574	9.32985	1.31263	66.3142	0.10181	0.06353	FALSE
3	Reaction	EPISTAXIS	1	33301	1574	0.15186	0.0214	1.07743	0.01812	0.06353	TRUE
3	Reaction	EPSTEIN-BARR VIRUS TEST POSITIVE	1	372	1574	13.6301	1.91605	96.9602	0.07092	0.06353	FALSE
3	Reaction	ERYSIPELAS	1	2070	1574	2.44407	0.34432	17.3486	0.33593	0.06353	FALSE
3	Reaction	ESCHERICHIA SEPSIS	1	1460	1574	3.46592	0.48818	24.6069	0.25078	0.06353	FALSE
3	Reaction	EXOSTOSIS	1	4471	1574	1.13127	0.15941	8.02802	0.58701	0.06353	FALSE
3	Reaction	EXTRAVASATION	1	2266	1574	2.23257	0.31454	15.8468	0.36118	0.06353	FALSE
3	Reaction	EYE DISORDER	1	13270	1574	0.3811	0.05371	2.70405	0.53164	0.06353	FALSE
3	Reaction	EYE INFECTION	1	3779	1574	1.33848	0.1886	9.49886	0.52641	0.06353	FALSE
3	Reaction	EYE INFLAMMATION	1	2369	1574	2.13546	0.30086	15.1572	0.37406	0.06353	FALSE
3	Reaction	EYE IRRITATION	1	17794	1574	0.2842	0.04005	2.01649	0.27822	0.06353	FALSE
3	Reaction	EYE PRURITUS	1	9199	1574	0.54977	0.07748	3.90098	1	0.06353	FALSE
3	Reaction	FACIAL BONES FRACTURE	1	2011	1574	2.51581	0.35442	17.8581	0.32813	0.06353	FALSE
3	Reaction	FEAR OF DEATH	1	1166	1574	4.34058	0.61127	30.8219	0.20592	0.06353	FALSE
3	Reaction	FIBROMYALGIA	1	9416	1574	0.5371	0.07569	3.81106	1	0.06353	FALSE
3	Reaction	FINGER AMPUTATION	1	411	1574	12.3336	1.73423	87.7151	0.07806	0.06353	FALSE
3	Reaction	FLANK PAIN	1	4485	1574	1.12774	0.15892	8.00295	0.58815	0.06353	FALSE
3	Reaction	FLATULENCE	1	25020	1574	0.20212	0.02849	1.43406	0.10638	0.06353	FALSE
3	Reaction	FLUSHING	1	58352	1574	0.08666	0.01221	0.61486	0.00028	0.06353	TRUE
3	Reaction	FREQUENT BOWEL MOVEMENTS	1	7768	1574	0.65106	0.09175	4.61979	1	0.06353	FALSE
3	Reaction	FUNGAL SEPSIS	1	414	1574	12.244	1.72166	87.0764	0.0786	0.06353	FALSE
3	Reaction	Faeces soft	1	1166	1574	4.34058	0.61127	30.8219	0.20592	0.06353	FALSE
3	Reaction	GAMMA RADIATION THERAPY	1	10	1574	561.864	71.224	4432.37	0.00198	0.06353	TRUE
3	Reaction	GANGRENE	1	2800	1574	1.80664	0.25455	12.8224	0.42521	0.06353	FALSE
3	Reaction	GASTRITIS EROSIVE	1	2629	1574	1.92419	0.27111	13.6571	0.40544	0.06353	FALSE
3	Reaction	GASTRITIS HAEMORRHAGIC	1	807	1574	6.27392	0.88321	44.567	0.1475	0.06353	FALSE
3	Reaction	GASTROENTERITIS EOSINOPHILIC	1	151	1574	33.7118	4.72066	240.748	0.02942	0.06353	TRUE
3	Reaction	GASTROINTESTINAL INFLAMMATION	1	2625	1574	1.92713	0.27152	13.6779	0.40497	0.06353	FALSE
3	Reaction	GASTROINTESTINAL INJURY	1	1767	1574	2.86341	0.40336	20.3269	0.29491	0.06353	FALSE
3	Reaction	GENERALISED OEDEMA	1	6240	1574	0.81051	0.11422	5.7514	1	0.06353	FALSE
3	Reaction	GINGIVAL BLEEDING	1	5909	1574	0.85592	0.12062	6.07368	1	0.06353	FALSE
3	Reaction	GLOMERULONEPHRITIS	1	1112	1574	4.55156	0.64096	32.3214	0.1974	0.06353	FALSE
3	Reaction	GOITRE	1	2264	1574	2.23455	0.31481	15.8608	0.36093	0.06353	FALSE
3	Reaction	GRANULOCYTE COUNT INCREASED	1	144	1574	35.3621	4.95016	252.613	0.02807	0.06353	TRUE
3	Reaction	GRANULOMA	1	1746	1574	2.89787	0.40821	20.5717	0.29198	0.06353	FALSE
3	Reaction	GRIP STRENGTH DECREASED	1	2297	1574	2.20243	0.31029	15.6327	0.36508	0.06353	FALSE
3	Reaction	GROIN PAIN	1	4190	1574	1.20716	0.1701	8.56667	0.5634	0.06353	FALSE
3	Reaction	HAEMATOCRIT DECREASED	1	12336	1574	0.40995	0.05778	2.90881	0.74033	0.06353	FALSE
3	Reaction	HAEMATOCRIT INCREASED	1	817	1574	6.19703	0.8724	44.0202	0.14918	0.06353	FALSE
3	Reaction	HAEMATOMA	1	13379	1574	0.37799	0.05327	2.68201	0.53228	0.06353	FALSE
3	Reaction	HAEMOGLOBIN INCREASED	1	1470	1574	3.44233	0.48486	24.4393	0.25226	0.06353	FALSE
3	Reaction	HAEMOGLOBINURIA	1	874	1574	5.79241	0.8155	41.1428	0.15872	0.06353	FALSE
3	Reaction	HAEMORRHAGE	1	47597	1574	0.10624	0.01497	0.75381	0.00157	0.06353	TRUE
3	Reaction	HAIR COLOUR CHANGES	1	2513	1574	2.01305	0.28362	14.288	0.39164	0.06353	FALSE
3	Reaction	HALLUCINATION	1	30454	1574	0.16605	0.0234	1.17816	0.03724	0.06353	TRUE
3	Reaction	HEART RATE DECREASED	1	13768	1574	0.36731	0.05177	2.60623	0.53511	0.06353	FALSE
3	Reaction	HEPATECTOMY	1	128	1574	39.8171	5.56901	284.684	0.02499	0.06353	TRUE
3	Reaction	HEPATIC ENZYME ABNORMAL	1	1976	1574	2.56039	0.3607	18.1748	0.32347	0.06353	FALSE
3	Reaction	HEPATIC LESION	1	1867	1574	2.70996	0.38176	19.237	0.30872	0.06353	FALSE
3	Reaction	HEPATIC NECROSIS	1	2595	1574	1.94941	0.27466	13.8361	0.40143	0.06353	FALSE
3	Reaction	HEPATIC PAIN	1	1881	1574	2.68978	0.37892	19.0937	0.31063	0.06353	FALSE
3	Reaction	HEPATITIS C	1	7004	1574	0.72209	0.10176	5.12386	1	0.06353	FALSE
3	Reaction	HEPATITIS E	1	280	1574	18.1246	2.54565	129.045	0.05386	0.06353	FALSE
3	Reaction	HEPATITIS FULMINANT	1	1656	1574	3.05545	0.4304	21.691	0.27926	0.06353	FALSE
3	Reaction	HEPATITIS INFECTIOUS	1	62	1574	82.898	11.4986	597.643	0.01218	0.06353	TRUE
3	Reaction	HERNIA REPAIR	1	1303	1574	3.88385	0.547	27.5763	0.22715	0.06353	FALSE
3	Reaction	HERPES VIRUS INFECTION	1	2664	1574	1.8989	0.26754	13.4775	0.40954	0.06353	FALSE
3	Reaction	HIATUS HERNIA	1	7077	1574	0.71464	0.10071	5.07099	1	0.06353	FALSE
3	Reaction	HIP ARTHROPLASTY	1	5514	1574	0.91725	0.12926	6.50893	1	0.06353	FALSE
3	Reaction	HIP FRACTURE	1	14083	1574	0.3591	0.05061	2.54792	0.53799	0.06353	FALSE
3	Reaction	HOSPICE CARE	1	1566	1574	3.23117	0.45514	22.9392	0.26632	0.06353	FALSE
3	Reaction	HOSPITALISATION	1	41233	1574	0.12264	0.01729	0.87015	0.00448	0.06353	TRUE
3	Reaction	HYDRONEPHROSIS	1	3454	1574	1.46446	0.20635	10.3932	0.49496	0.06353	FALSE
3	Reaction	HYPERAESTHESIA	1	4362	1574	1.15955	0.1634	8.22872	0.578	0.06353	FALSE
3	Reaction	HYPERHIDROSIS	1	63369	1574	0.0798	0.01125	0.56618	9e-05	0.06353	TRUE
3	Reaction	HYPERNATRAEMIA	1	2261	1574	2.23751	0.31523	15.8818	0.36055	0.06353	FALSE
3	Reaction	HYPERSOMNIA	1	12395	1574	0.408	0.0575	2.89497	0.52913	0.06353	FALSE
3	Reaction	HYPERTRANSAMINASAEMIA	1	710	1574	7.13227	1.00388	50.6728	0.13099	0.06353	FALSE
3	Reaction	HYPOGONADISM MALE	1	135	1574	37.7371	5.28021	269.704	0.02634	0.06353	TRUE
3	Reaction	HYPOKINESIA	1	6137	1574	0.82412	0.11614	5.84796	1	0.06353	FALSE
3	Reaction	HYPOPHAGIA	1	10597	1574	0.47723	0.06726	3.38625	0.72973	0.06353	FALSE
3	Reaction	HYPOVOLAEMIC SHOCK	1	1999	1574	2.53092	0.35655	17.9655	0.32654	0.06353	FALSE
3	Reaction	Hepatic hypertrophy	1	8	1574	722.397	88.9282	5868.3	0.00158	0.06353	TRUE
3	Reaction	Hernia perforation	1	26	1574	202.271	27.4236	1491.91	0.00513	0.06353	TRUE
3	Reaction	ILEOSTOMY	1	858	1574	5.90056	0.83071	41.9118	0.15605	0.06353	FALSE
3	Reaction	IMMUNODEFICIENCY	1	3188	1574	1.58669	0.22357	11.2609	0.46768	0.06353	FALSE
3	Reaction	INAPPROPRIATE ANTIDIURETIC HORMONE SECRETION	1	4373	1574	1.15663	0.16299	8.20801	0.57892	0.06353	FALSE
3	Reaction	INCONTINENCE	1	5138	1574	0.98438	0.13872	6.98544	1	0.06353	FALSE
3	Reaction	INCREASED UPPER AIRWAY SECRETION	1	3993	1574	1.26673	0.1785	8.98952	0.54604	0.06353	FALSE
3	Reaction	INFERIOR VENA CAVAL OCCLUSION	1	77	1574	66.5366	9.25827	478.179	0.01511	0.06353	TRUE
3	Reaction	INFLAMMATORY BOWEL DISEASE	1	6412	1574	0.78877	0.11116	5.59708	1	0.06353	FALSE
3	Reaction	INFREQUENT BOWEL MOVEMENTS	1	1095	1574	4.62228	0.65091	32.8241	0.1947	0.06353	FALSE
3	Reaction	INTUSSUSCEPTION	1	348	1574	14.5729	2.0482	103.685	0.0665	0.06353	FALSE
3	Reaction	IRIDOCYCLITIS	1	894	1574	5.66268	0.79726	40.2203	0.16204	0.06353	FALSE
3	Reaction	IRON DEFICIENCY ANAEMIA	1	4358	1574	1.16061	0.16355	8.23627	0.57767	0.06353	FALSE
3	Reaction	ISCHAEMIC CARDIOMYOPATHY	1	2357	1574	2.14634	0.30239	15.2344	0.37257	0.06353	FALSE
3	Reaction	ISCHAEMIC NEUROPATHY	1	43	1574	120.399	16.5806	874.276	0.00847	0.06353	TRUE
3	Reaction	Incarcerated umbilical hernia	1	34	1574	153.236	20.9705	1119.73	0.0067	0.06353	TRUE
3	Reaction	Intestinal sepsis	1	29	1574	180.599	24.5865	1326.58	0.00572	0.06353	TRUE
3	Reaction	JAUNDICE CHOLESTATIC	1	1880	1574	2.69121	0.37912	19.1038	0.3105	0.06353	FALSE
3	Reaction	JOINT EFFUSION	1	3204	1574	1.57876	0.22245	11.2046	0.46936	0.06353	FALSE
3	Reaction	JOINT INJURY	1	9475	1574	0.53375	0.07522	3.78732	1	0.06353	FALSE
3	Reaction	JOINT SWELLING	1	41346	1574	0.12231	0.01724	0.86778	0.00448	0.06353	TRUE
3	Reaction	KERATITIS	1	1208	1574	4.18954	0.59002	29.7486	0.21249	0.06353	FALSE
3	Reaction	KIDNEY TRANSPLANT REJECTION	1	2695	1574	1.87705	0.26447	13.3224	0.41315	0.06353	FALSE
3	Reaction	KLEBSIELLA BACTERAEMIA	1	280	1574	18.1246	2.54565	129.045	0.05386	0.06353	FALSE
3	Reaction	LABORATORY TEST ABNORMAL	1	10274	1574	0.49224	0.06937	3.49273	0.7292	0.06353	FALSE
3	Reaction	LATENT AUTOIMMUNE DIABETES IN ADULTS	1	49	1574	105.35	14.55	762.787	0.00964	0.06353	TRUE
3	Reaction	LICHEN PLANUS	1	987	1574	5.12858	0.72214	36.423	0.17731	0.06353	FALSE
3	Reaction	LIVER INJURY	1	6166	1574	0.82024	0.11559	5.82045	1	0.06353	FALSE
3	Reaction	LOBAR PNEUMONIA	1	2140	1574	2.36408	0.33306	16.7807	0.34506	0.06353	FALSE
3	Reaction	LOWER RESPIRATORY TRACT INFECTION	1	13471	1574	0.37541	0.05291	2.6637	0.53287	0.06353	FALSE
3	Reaction	LUNG NEOPLASM	1	3472	1574	1.45686	0.20528	10.3392	0.49676	0.06353	FALSE
3	Reaction	LYMPHADENECTOMY	1	494	1574	10.2572	1.44284	72.9183	0.09306	0.06353	FALSE
3	Reaction	LYMPHOCYTE COUNT ABNORMAL	1	302	1574	16.7999	2.36019	119.582	0.05797	0.06353	FALSE
3	Reaction	LYMPHOCYTOSIS	1	996	1574	5.08219	0.71561	36.0932	0.17877	0.06353	FALSE
3	Reaction	LYMPHOMA	1	7066	1574	0.71575	0.10087	5.07889	1	0.06353	FALSE
3	Reaction	LYMPHOPENIA	1	4868	1574	1.03899	0.14641	7.37304	0.6182	0.06353	FALSE
3	Reaction	LYMPHOPROLIFERATIVE DISORDER	1	1082	1574	4.67787	0.65873	33.2192	0.19262	0.06353	FALSE
3	Reaction	MACULAR DEGENERATION	1	4809	1574	1.05174	0.14821	7.46354	0.61372	0.06353	FALSE
3	Reaction	MECHANICAL ILEUS	1	157	1574	32.4152	4.54023	231.431	0.03057	0.06353	TRUE
3	Reaction	MEDICAL DEVICE DISCOMFORT	1	2001	1574	2.52839	0.35619	17.9475	0.3268	0.06353	FALSE
3	Reaction	MELANOCYTIC NAEVUS	1	1791	1574	2.82502	0.39796	20.0542	0.29825	0.06353	FALSE
3	Reaction	MELANOSIS	1	60	1574	85.7081	11.882	618.236	0.01179	0.06353	TRUE
3	Reaction	MEMORY IMPAIRMENT	1	56611	1574	0.08933	0.01259	0.63377	0.0004	0.06353	TRUE
3	Reaction	MENINGEAL DISORDER	1	283	1574	17.9318	2.51866	127.667	0.05442	0.06353	FALSE
3	Reaction	MENINGIOMA	1	1289	1574	3.92607	0.55294	27.8763	0.22501	0.06353	FALSE
3	Reaction	MENINGISM	1	251	1574	20.2271	2.83979	144.073	0.04842	0.06353	TRUE
3	Reaction	MENINGITIS NONINFECTIVE	1	23	1574	229.854	31.0004	1704.26	0.00454	0.06353	TRUE
3	Reaction	METABOLIC ACIDOSIS	1	12094	1574	0.41816	0.05893	2.96703	0.73818	0.06353	FALSE
3	Reaction	METASTASES TO BLADDER	1	106	1574	48.1598	6.72501	344.887	0.02074	0.06353	TRUE
3	Reaction	METASTASES TO SPINE	1	1378	1574	3.67231	0.51723	26.0733	0.23853	0.06353	FALSE
3	Reaction	METASTATIC LYMPHOMA	1	116	1574	43.972	6.14519	314.642	0.02268	0.06353	TRUE
3	Reaction	MIGRAINE	1	34443	1574	0.14682	0.02069	1.0417	0.01867	0.06353	TRUE
3	Reaction	MIXED LIVER INJURY	1	437	1574	11.5981	1.63104	82.4727	0.08278	0.06353	FALSE
3	Reaction	MOLE EXCISION	1	151	1574	33.7118	4.72066	240.748	0.02942	0.06353	TRUE
3	Reaction	MONOCYTE COUNT INCREASED	1	1243	1574	4.07148	0.57341	28.9096	0.21792	0.06353	FALSE
3	Reaction	MONOPLEGIA	1	2273	1574	2.22569	0.31357	15.7979	0.36206	0.06353	FALSE
3	Reaction	MUCOSAL INFECTION	1	109	1574	46.822	6.53989	335.22	0.02132	0.06353	TRUE
3	Reaction	MULTIPLE FRACTURES	1	3731	1574	1.3557	0.19103	9.62112	0.52189	0.06353	FALSE
3	Reaction	MUSCLE TWITCHING	1	11582	1574	0.43664	0.06154	3.09821	0.73429	0.06353	FALSE
3	Reaction	MUSCULOSKELETAL CHEST PAIN	1	6998	1574	0.72271	0.10185	5.12825	1	0.06353	FALSE
3	Reaction	MUSCULOSKELETAL DISORDER	1	8548	1574	0.59164	0.08338	4.19814	1	0.06353	FALSE
3	Reaction	MUSCULOSKELETAL PAIN	1	30382	1574	0.16645	0.02346	1.18095	0.03712	0.06353	TRUE
3	Reaction	MYASTHENIC SYNDROME	1	179	1574	28.4089	3.98216	202.67	0.03478	0.06353	TRUE
3	Reaction	MYELITIS TRANSVERSE	1	599	1574	8.45615	1.18991	60.094	0.1117	0.06353	FALSE
3	Reaction	MYOCARDIAL ISCHAEMIA	1	8542	1574	0.59206	0.08344	4.20109	1	0.06353	FALSE
3	Reaction	Meningoencephalitis viral	1	24	1574	219.86	29.7089	1627.07	0.00473	0.06353	TRUE
3	Reaction	Myocardial necrosis marker increased	1	356	1574	14.2444	2.00217	101.342	0.06797	0.06353	FALSE
3	Reaction	NASAL CONGESTION	1	21355	1574	0.23681	0.03338	1.6802	0.1415	0.06353	FALSE
3	Reaction	NASOPHARYNGITIS	1	67912	1574	0.07446	0.01049	0.52831	5e-05	0.06353	TRUE
3	Reaction	NECK MASS	1	1141	1574	4.43577	0.62467	31.4984	0.20199	0.06353	FALSE
3	Reaction	NECROSIS	1	3180	1574	1.59068	0.22413	11.2892	0.46683	0.06353	FALSE
3	Reaction	NECROTISING FASCIITIS	1	1331	1574	3.80209	0.5355	26.9953	0.23142	0.06353	FALSE
3	Reaction	NEPHROPATHY TOXIC	1	4061	1574	1.24551	0.17551	8.83892	0.55211	0.06353	FALSE
3	Reaction	NEUROLOGICAL DECOMPENSATION	1	910	1574	5.56301	0.78324	39.5116	0.16469	0.06353	FALSE
3	Reaction	NEUROLOGICAL SYMPTOM	1	2669	1574	1.89534	0.26704	13.4522	0.41012	0.06353	FALSE
3	Reaction	NEUROLYSIS	1	16	1574	337.119	44.5565	2550.67	0.00316	0.06353	TRUE
3	Reaction	NEUROSURGERY	1	70	1574	73.2866	10.1843	527.375	0.01375	0.06353	TRUE
3	Reaction	NEUTROPHIL COUNT	1	109	1574	46.822	6.53989	335.22	0.02132	0.06353	TRUE
3	Reaction	NEUTROPHIL COUNT INCREASED	1	5232	1574	0.96669	0.13623	6.85989	1	0.06353	FALSE
3	Reaction	NIGHTMARE	1	18234	1574	0.27734	0.03909	1.96782	0.28122	0.06353	FALSE
3	Reaction	NODULE	1	5226	1574	0.9678	0.13638	6.86777	1	0.06353	FALSE
3	Reaction	NON-CARDIAC CHEST PAIN	1	2156	1574	2.34653	0.33058	16.656	0.34713	0.06353	FALSE
3	Reaction	NONSPECIFIC REACTION	1	2173	1574	2.32817	0.328	16.5256	0.34932	0.06353	FALSE
3	Reaction	NORMOCHROMIC NORMOCYTIC ANAEMIA	1	2010	1574	2.51706	0.3546	17.867	0.328	0.06353	FALSE
3	Reaction	OBSTRUCTION GASTRIC	1	487	1574	10.4049	1.46358	73.9707	0.09181	0.06353	FALSE
3	Reaction	OBSTRUCTIVE UROPATHY	1	434	1574	11.6785	1.64232	83.0453	0.08224	0.06353	FALSE
3	Reaction	OCULAR HYPERTENSION	1	568	1574	8.91848	1.25486	63.3852	0.10624	0.06353	FALSE
3	Reaction	OCULAR ICTERUS	1	2468	1574	2.04977	0.28879	14.5487	0.3862	0.06353	FALSE
3	Reaction	OESOPHAGEAL CANDIDIASIS	1	1688	1574	2.9975	0.42224	21.2793	0.28381	0.06353	FALSE
3	Reaction	OPTIC ISCHAEMIC NEUROPATHY	1	1556	1574	3.25195	0.45806	23.0868	0.26487	0.06353	FALSE
3	Reaction	OPTIC NEURITIS	1	4942	1574	1.02343	0.14422	7.2626	0.62375	0.06353	FALSE
3	Reaction	OPTIC NEUROPATHY	1	882	1574	5.73982	0.80811	40.7688	0.16005	0.06353	FALSE
3	Reaction	ORAL CANDIDIASIS	1	5420	1574	0.93316	0.1315	6.62186	1	0.06353	FALSE
3	Reaction	ORAL DISORDER	1	3411	1574	1.48293	0.20895	10.5243	0.49065	0.06353	FALSE
3	Reaction	ORCHITIS	1	445	1574	11.3891	1.60172	80.9834	0.08423	0.06353	FALSE
3	Reaction	ORTHOSTATIC HYPOTENSION	1	7516	1574	0.67289	0.09483	4.77472	1	0.06353	FALSE
3	Reaction	OSTEOCHONDROSIS	1	522	1574	9.70591	1.36544	68.9921	0.09807	0.06353	FALSE
3	Reaction	OTITIS MEDIA	1	1715	1574	2.95028	0.41559	20.9439	0.28763	0.06353	FALSE
3	Reaction	OVERDOSE	1	64504	1574	0.0784	0.01105	0.55622	0.0001	0.06353	TRUE
3	Reaction	OXYGEN SATURATION DECREASED	1	18049	1574	0.28018	0.03949	1.98799	0.27984	0.06353	FALSE
3	Reaction	Oesophageal motility disorder	1	93	1574	54.965	7.66521	394.138	0.01822	0.06353	TRUE
3	Reaction	PAIN IN JAW	1	12982	1574	0.38955	0.0549	2.76405	0.53029	0.06353	FALSE
3	Reaction	PAIN OF SKIN	1	5074	1574	0.9968	0.14047	7.07359	1	0.06353	FALSE
3	Reaction	PAINFUL RESPIRATION	1	1282	1574	3.94752	0.55596	28.0287	0.22393	0.06353	FALSE
3	Reaction	PALMAR-PLANTAR ERYTHRODYSAESTHESIA SYNDROME	1	9098	1574	0.55587	0.07834	3.94429	1	0.06353	FALSE
3	Reaction	PALPITATIONS	1	53232	1574	0.095	0.01339	0.67401	0.00054	0.06353	TRUE
3	Reaction	PANCREATIC DISORDER	1	2123	1574	2.38302	0.33572	16.9152	0.34285	0.06353	FALSE
3	Reaction	PANCREATIC ENZYMES INCREASED	1	755	1574	6.7066	0.94404	47.6446	0.13869	0.06353	FALSE
3	Reaction	PANCREATIC INSUFFICIENCY	1	403	1574	12.5791	1.76865	89.4649	0.0766	0.06353	FALSE
3	Reaction	PARANEOPLASTIC RETINOPATHY	1	5	1574	1264.19	141.373	11304.8	0.00099	0.06353	TRUE
3	Reaction	PARANEOPLASTIC SYNDROME	1	381	1574	13.3073	1.87079	94.6578	0.07257	0.06353	FALSE
3	Reaction	PARAPARESIS	1	874	1574	5.79241	0.8155	41.1428	0.15872	0.06353	FALSE
3	Reaction	PARASITE STOOL TEST POSITIVE	1	25	1574	210.699	28.5205	1556.57	0.00493	0.06353	TRUE
3	Reaction	PARVOVIRUS INFECTION	1	199	1574	25.5393	3.58191	182.097	0.03859	0.06353	TRUE
3	Reaction	PELVIC VENOUS THROMBOSIS	1	931	1574	5.4374	0.76557	38.6185	0.16815	0.06353	FALSE
3	Reaction	PERFORMANCE STATUS DECREASED	1	2622	1574	1.92933	0.27183	13.6936	0.40461	0.06353	FALSE
3	Reaction	PERIODONTITIS	1	1213	1574	4.17226	0.58759	29.6257	0.21327	0.06353	FALSE
3	Reaction	PERIPHERAL COLDNESS	1	6485	1574	0.77989	0.10991	5.53405	1	0.06353	FALSE
3	Reaction	PERIPHERAL ISCHAEMIA	1	2051	1574	2.46672	0.34751	17.5095	0.33343	0.06353	FALSE
3	Reaction	PERIPHERAL SENSORIMOTOR NEUROPATHY	1	462	1574	10.9692	1.54278	77.9907	0.08731	0.06353	FALSE
3	Reaction	PERITONITIS	1	12704	1574	0.39808	0.0561	2.82454	0.52946	0.06353	FALSE
3	Reaction	PERONEAL NERVE PALSY	1	2989	1574	1.69236	0.23845	12.0111	0.4463	0.06353	FALSE
3	Reaction	PHARYNGITIS	1	5743	1574	0.88066	0.12411	6.2493	1	0.06353	FALSE
3	Reaction	PHARYNGOTONSILLITIS	1	92	1574	55.569	7.74854	398.515	0.01803	0.06353	TRUE
3	Reaction	PHOTOSENSITIVITY REACTION	1	7067	1574	0.71565	0.10085	5.07817	1	0.06353	FALSE
3	Reaction	PLEURISY	1	3437	1574	1.4717	0.20737	10.4446	0.49326	0.06353	FALSE
3	Reaction	PNEUMATOSIS INTESTINALIS	1	923	1574	5.48457	0.77221	38.9539	0.16683	0.06353	FALSE
3	Reaction	PNEUMOCEPHALUS	1	156	1574	32.6244	4.56934	232.933	0.03038	0.06353	TRUE
3	Reaction	PNEUMOCYSTIS TEST POSITIVE	1	28	1574	187.288	25.4647	1377.47	0.00552	0.06353	TRUE
3	Reaction	PNEUMONIA FUNGAL	1	1054	1574	4.80226	0.67623	34.1033	0.18814	0.06353	FALSE
3	Reaction	PNEUMONIA STREPTOCOCCAL	1	533	1574	9.50522	1.33726	67.563	0.10003	0.06353	FALSE
3	Reaction	PNEUMOTHORAX	1	6445	1574	0.78473	0.11059	5.56841	1	0.06353	FALSE
3	Reaction	POLLAKIURIA	1	18845	1574	0.26835	0.03782	1.90401	0.28693	0.06353	FALSE
3	Reaction	POLYDIPSIA	1	2150	1574	2.35308	0.33151	16.7025	0.34635	0.06353	FALSE
3	Reaction	POLYMYALGIA RHEUMATICA	1	1134	1574	4.46318	0.62852	31.6932	0.20088	0.06353	FALSE
3	Reaction	POLYNEUROPATHY	1	3693	1574	1.36966	0.193	9.72018	0.51829	0.06353	FALSE
3	Reaction	PORTAL HYPERTENSION	1	1499	1574	3.37569	0.47548	23.9658	0.25653	0.06353	FALSE
3	Reaction	PORTAL VEIN THROMBOSIS	1	1603	1574	3.15654	0.44463	22.4091	0.27167	0.06353	FALSE
3	Reaction	PRIMARY HYPOTHYROIDISM	1	59	1574	87.1858	12.0834	629.074	0.0116	0.06353	TRUE
3	Reaction	PROGRESSIVE MULTIFOCAL LEUKOENCEPHALOPATHY	1	3961	1574	1.27696	0.17994	9.06218	0.54316	0.06353	FALSE
3	Reaction	PROSTATITIS	1	1522	1574	3.32464	0.46829	23.6032	0.25991	0.06353	FALSE
3	Reaction	PROTEIN S INCREASED	1	21	1574	252.839	33.9524	1882.86	0.00414	0.06353	TRUE
3	Reaction	PROTHROMBIN TIME PROLONGED	1	4943	1574	1.02322	0.14419	7.26113	0.62383	0.06353	FALSE
3	Reaction	PRURIGO	1	684	1574	7.40377	1.04204	52.6045	0.12651	0.06353	FALSE
3	Reaction	PSEUDOMONAS TEST POSITIVE	1	420	1574	12.0687	1.69706	85.8266	0.0797	0.06353	FALSE
3	Reaction	PULMONARY ARTERY THROMBOSIS	1	408	1574	12.4245	1.74698	88.3632	0.07751	0.06353	FALSE
3	Reaction	PURPURA	1	4759	1574	1.06279	0.14977	7.54198	0.60988	0.06353	FALSE
3	Reaction	PYELONEPHRITIS ACUTE	1	871	1574	5.81239	0.81831	41.2848	0.15822	0.06353	FALSE
3	Reaction	Peripheral arthritis	1	116	1574	43.972	6.14519	314.642	0.02268	0.06353	TRUE
3	Reaction	Polyglandular autoimmune syndrome type I	1	4	1574	1685.59	175.423	16196.4	0.00079	0.06353	TRUE
3	Reaction	Primary hypoparathyroidism	1	4	1574	1685.59	175.423	16196.4	0.00079	0.06353	TRUE
3	Reaction	Procedural pneumothorax	1	23	1574	229.854	31.0004	1704.26	0.00454	0.06353	TRUE
3	Reaction	RADIATION SKIN INJURY	1	684	1574	7.40377	1.04204	52.6045	0.12651	0.06353	FALSE
3	Reaction	RADICULOPATHY	1	1142	1574	4.43188	0.62412	31.4708	0.20215	0.06353	FALSE
3	Reaction	RASH ERYTHEMATOUS	1	17448	1574	0.28984	0.04085	2.05648	0.27655	0.06353	FALSE
3	Reaction	RAYNAUD'S PHENOMENON	1	2176	1574	2.32496	0.32755	16.5028	0.34971	0.06353	FALSE
3	Reaction	RECURRENT CANCER	1	1136	1574	4.45531	0.62742	31.6373	0.2012	0.06353	FALSE
3	Reaction	RED CELL DISTRIBUTION WIDTH INCREASED	1	1012	1574	5.00176	0.7043	35.5214	0.18137	0.06353	FALSE
3	Reaction	RENAL CYST	1	4009	1574	1.26167	0.17778	8.95363	0.54748	0.06353	FALSE
3	Reaction	RENAL TUBULAR NECROSIS	1	4312	1574	1.17299	0.16529	8.32418	0.57381	0.06353	FALSE
3	Reaction	RESPIRATION ABNORMAL	1	1525	1574	3.3181	0.46737	23.5567	0.26035	0.06353	FALSE
3	Reaction	RESPIRATORY ARREST	1	18738	1574	0.26988	0.03804	1.91489	0.28581	0.06353	FALSE
3	Reaction	RESPIRATORY DEPRESSION	1	5368	1574	0.9422	0.13277	6.68603	1	0.06353	FALSE
3	Reaction	RESPIRATORY TRACT INFLAMMATION	1	181	1574	28.0932	3.93815	200.406	0.03516	0.06353	TRUE
3	Reaction	RESTLESSNESS	1	17727	1574	0.28527	0.04021	2.02411	0.27785	0.06353	FALSE
3	Reaction	RETICULOCYTOSIS	1	94	1574	54.374	7.58366	389.855	0.01842	0.06353	TRUE
3	Reaction	RETINAL DETACHMENT	1	4187	1574	1.20802	0.17023	8.57281	0.56314	0.06353	FALSE
3	Reaction	RETROPERITONEAL HAEMORRHAGE	1	1555	1574	3.25404	0.45836	23.1017	0.26472	0.06353	FALSE
3	Reaction	RHINORRHOEA	1	21979	1574	0.23008	0.03243	1.63249	0.14314	0.06353	FALSE
3	Reaction	Rheumatic disorder	1	535	1574	9.46962	1.33226	67.3095	0.10039	0.06353	FALSE
3	Reaction	SCAB	1	4174	1574	1.21178	0.17076	8.59952	0.56201	0.06353	FALSE
3	Reaction	SCAR	1	8417	1574	0.60085	0.08468	4.26349	1	0.06353	FALSE
3	Reaction	SCLERODERMA	1	1711	1574	2.95718	0.41656	20.993	0.28706	0.06353	FALSE
3	Reaction	SHOCK	1	11126	1574	0.45454	0.06406	3.22522	0.73166	0.06353	FALSE
3	Reaction	SINUS DISORDER	1	7961	1574	0.63527	0.08953	4.50776	1	0.06353	FALSE
3	Reaction	SKIN DEPIGMENTATION	1	570	1574	8.88713	1.25045	63.162	0.10659	0.06353	FALSE
3	Reaction	SKIN IRRITATION	1	6486	1574	0.77977	0.10989	5.5332	1	0.06353	FALSE
3	Reaction	SKIN MASS	1	2109	1574	2.39885	0.33795	17.0275	0.34103	0.06353	FALSE
3	Reaction	SKIN NECROSIS	1	2598	1574	1.94716	0.27434	13.8201	0.40178	0.06353	FALSE
3	Reaction	SKIN NEOPLASM EXCISION	1	347	1574	14.615	2.0541	103.986	0.06631	0.06353	FALSE
3	Reaction	SLEEP DISORDER	1	24756	1574	0.20427	0.02879	1.44936	0.10501	0.06353	FALSE
3	Reaction	SOFT TISSUE INFECTION	1	813	1574	6.22756	0.87669	44.2373	0.14851	0.06353	FALSE
3	Reaction	SPINAL COLUMN STENOSIS	1	4184	1574	1.20889	0.17035	8.57896	0.56288	0.06353	FALSE
3	Reaction	SPINAL CORD COMPRESSION	1	1815	1574	2.78764	0.39269	19.7887	0.30158	0.06353	FALSE
3	Reaction	SPINAL DISORDER	1	4572	1574	1.10627	0.15589	7.85059	0.59518	0.06353	FALSE
3	Reaction	SPINAL PAIN	1	3571	1574	1.41646	0.19959	10.0524	0.50652	0.06353	FALSE
3	Reaction	STENT PLACEMENT	1	4626	1574	1.09336	0.15407	7.75891	0.59948	0.06353	FALSE
3	Reaction	STERNAL FRACTURE	1	506	1574	10.0134	1.40862	71.1823	0.09521	0.06353	FALSE
3	Reaction	STRIDOR	1	1530	1574	3.30725	0.46584	23.4796	0.26108	0.06353	FALSE
3	Reaction	STRONGYLOIDIASIS	1	449	1574	11.2874	1.58745	80.2587	0.08496	0.06353	FALSE
3	Reaction	SUBARACHNOID HAEMORRHAGE	1	4579	1574	1.10458	0.15565	7.83859	0.59574	0.06353	FALSE
3	Reaction	SUBDURAL HAEMATOMA	1	7004	1574	0.72209	0.10176	5.12386	1	0.06353	FALSE
3	Reaction	SUBDURAL HAEMORRHAGE	1	1354	1574	3.73746	0.5264	26.5361	0.23491	0.06353	FALSE
3	Reaction	SUBILEUS	1	1163	1574	4.35179	0.61285	30.9016	0.20545	0.06353	FALSE
3	Reaction	SUDDEN HEARING LOSS	1	944	1574	5.36244	0.75503	38.0855	0.17028	0.06353	FALSE
3	Reaction	SUNBURN	1	3941	1574	1.28345	0.18085	9.1082	0.54135	0.06353	FALSE
3	Reaction	SUPERIOR VENA CAVA SYNDROME	1	256	1574	19.8305	2.78432	141.237	0.04936	0.06353	TRUE
3	Reaction	SUPRAPUBIC PAIN	1	281	1574	18.0599	2.53659	128.582	0.05405	0.06353	FALSE
3	Reaction	SWELLING FACE	1	29629	1574	0.17068	0.02406	1.21097	0.03631	0.06353	TRUE
3	Reaction	TEMPORAL ARTERITIS	1	667	1574	7.59276	1.0686	53.9492	0.12357	0.06353	FALSE
3	Reaction	TENDERNESS	1	5026	1574	1.00632	0.14181	7.14117	0.62995	0.06353	FALSE
3	Reaction	TESTICULAR PAIN	1	1543	1574	3.27936	0.46192	23.2816	0.26298	0.06353	FALSE
3	Reaction	THERAPEUTIC PROCEDURE	1	585	1574	8.65887	1.21839	61.537	0.10924	0.06353	FALSE
3	Reaction	THERAPEUTIC RESPONSE UNEXPECTED	1	20561	1574	0.24595	0.03466	1.74509	0.20391	0.06353	FALSE
3	Reaction	THERAPY RESPONDER	1	391	1574	12.9661	1.82294	92.2246	0.0744	0.06353	FALSE
3	Reaction	THIRST DECREASED	1	246	1574	20.6399	2.89751	147.025	0.04748	0.06353	TRUE
3	Reaction	THORACIC CAVITY DRAINAGE	1	162	1574	31.4086	4.40008	224.2	0.03153	0.06353	TRUE
3	Reaction	THORACOSTOMY	1	64	1574	80.2663	11.1392	578.377	0.01258	0.06353	TRUE
3	Reaction	THROAT IRRITATION	1	18376	1574	0.2752	0.03879	1.95261	0.28239	0.06353	FALSE
3	Reaction	THROMBOCYTOPENIC PURPURA	1	853	1574	5.93519	0.83558	42.1581	0.15522	0.06353	FALSE
3	Reaction	THROMBOTIC MICROANGIOPATHY	1	2964	1574	1.70664	0.24046	12.1125	0.44356	0.06353	FALSE
3	Reaction	THROMBOTIC THROMBOCYTOPENIC PURPURA	1	2257	1574	2.24148	0.31579	15.91	0.36004	0.06353	FALSE
3	Reaction	THYROIDITIS CHRONIC	1	39	1574	133.073	18.2815	968.652	0.00768	0.06353	TRUE
3	Reaction	TONGUE DISCOLOURATION	1	2699	1574	1.87427	0.26408	13.3026	0.41361	0.06353	FALSE
3	Reaction	TOOTH EXTRACTION	1	6965	1574	0.72613	0.10233	5.15256	1	0.06353	FALSE
3	Reaction	TOOTH INFECTION	1	5110	1574	0.98978	0.13948	7.02373	1	0.06353	FALSE
3	Reaction	TOXIC EPIDERMAL NECROLYSIS	1	6764	1574	0.74771	0.10537	5.30572	1	0.06353	FALSE
3	Reaction	TOXICITY TO VARIOUS AGENTS	1	45983	1574	0.10997	0.0155	0.78026	0.00226	0.06353	TRUE
3	Reaction	TRANSFUSION-ASSOCIATED DYSPNOEA	1	10	1574	561.864	71.224	4432.37	0.00198	0.06353	TRUE
3	Reaction	TRANSIENT ISCHAEMIC ATTACK	1	20250	1574	0.24973	0.0352	1.7719	0.20178	0.06353	FALSE
3	Reaction	TREMOR	1	81152	1574	0.06231	0.00878	0.44211	0	0.06353	TRUE
3	Reaction	TROPONIN I INCREASED	1	764	1574	6.62749	0.93292	47.0819	0.14022	0.06353	FALSE
3	Reaction	TROPONIN INCREASED	1	2874	1574	1.7601	0.248	12.492	0.43356	0.06353	FALSE
3	Reaction	TUMOUR HAEMORRHAGE	1	1116	1574	4.53523	0.63866	32.2053	0.19803	0.06353	FALSE
3	Reaction	TUMOUR PAIN	1	420	1574	12.0687	1.69706	85.8266	0.0797	0.06353	FALSE
3	Reaction	Thyroid hormones decreased	1	97	1574	52.6748	7.34907	377.548	0.019	0.06353	TRUE
3	Reaction	Tumour pseudoprogression	1	49	1574	105.35	14.55	762.787	0.00964	0.06353	TRUE
3	Reaction	UPPER LIMB FRACTURE	1	9339	1574	0.54153	0.07632	3.84249	1	0.06353	FALSE
3	Reaction	URETHRITIS	1	246	1574	20.6399	2.89751	147.025	0.04748	0.06353	TRUE
3	Reaction	URINARY RETENTION	1	14654	1574	0.3451	0.04864	2.44863	0.38232	0.06353	FALSE
3	Reaction	URINE OUTPUT DECREASED	1	4961	1574	1.01951	0.14367	7.23477	0.62516	0.06353	FALSE
3	Reaction	URINE OUTPUT INCREASED	1	1389	1574	3.64321	0.51313	25.8665	0.24018	0.06353	FALSE
3	Reaction	Urticarial vasculitis	1	38	1574	136.67	18.7627	995.517	0.00749	0.06353	TRUE
3	Reaction	VARICOCELE	1	157	1574	32.4152	4.54023	231.431	0.03057	0.06353	TRUE
3	Reaction	VENA CAVA FILTER INSERTION	1	268	1574	18.9392	2.65964	134.866	0.05161	0.06353	FALSE
3	Reaction	VIITH NERVE PARALYSIS	1	3678	1574	1.37525	0.19378	9.75984	0.51685	0.06353	FALSE
3	Reaction	VOCAL CORD PARALYSIS	1	844	1574	5.99855	0.84449	42.6087	0.15371	0.06353	FALSE
3	Reaction	VOLVULUS	1	789	1574	6.41723	0.90336	45.5863	0.14446	0.06353	FALSE
3	Reaction	WEIGHT INCREASED	1	93623	1574	0.05401	0.00761	0.38322	0	0.06353	TRUE
3	Reaction	WRONG DRUG ADMINISTERED	1	8134	1574	0.62176	0.08762	4.41186	1	0.06353	FALSE
3	Reaction	YELLOW SKIN	1	2330	1574	2.17122	0.3059	15.4111	0.36921	0.06353	FALSE

## Sheet: Cohort 4
COHORT	CONCEPT	NAME	CONCEPT_AES_IN_COHORT	CONCEPT_CASE_COUNT	COHORT_SIZE	PRR	PRR_95CI(-)	PRR_95CI(+)	P-value Fisher Exact Test (two tailed)	COHORT_%COVERAGE	Significant_FisherExactTest
4	Reaction	DIARRHOEA	759	235661	4839	5.31251	4.97595	5.67183	0	15.6851	TRUE
4	Reaction	COLITIS	577	12513	4839	79.4807	73.4693	85.984	0	11.9239	TRUE
4	Reaction	MALIGNANT NEOPLASM PROGRESSION	567	30093	4839	31.5735	29.1993	34.1408	0	11.7173	TRUE
4	Reaction	DEATH	344	340884	4839	1.66087	1.49996	1.83904	0	7.10891	TRUE
4	Reaction	RASH	282	157441	4839	2.95022	2.63402	3.30438	0	5.82765	TRUE
4	Reaction	FATIGUE	279	290118	4839	1.58268	1.4122	1.77373	0	5.76565	TRUE
4	Reaction	PYREXIA	272	155533	4839	2.88039	2.56605	3.23324	0	5.621	TRUE
4	Reaction	NAUSEA	243	342597	4839	1.16701	1.03238	1.3192	0.01591	5.0217	TRUE
4	Reaction	HYPOPHYSITIS	222	475	4839	1442.7	1207.43	1723.83	0	4.58772	TRUE
4	Reaction	VOMITING	219	208039	4839	1.73261	1.52219	1.97213	0	4.52573	TRUE
4	Reaction	DEHYDRATION	216	67030	4839	5.31534	4.66472	6.05671	0	4.46373	TRUE
4	Reaction	NEOPLASM MALIGNANT	180	22410	4839	13.3131	11.5282	15.3742	0	3.71978	TRUE
4	Reaction	HEADACHE	176	267648	4839	1.08188	0.93578	1.25079	0.28146	3.63712	FALSE
4	Reaction	ABDOMINAL PAIN	147	104338	4839	2.3197	1.97811	2.72028	0	3.03782	TRUE
4	Reaction	PRURITUS	142	125446	4839	1.86324	1.58435	2.19122	0	2.93449	TRUE
4	Reaction	DYSPNOEA	140	243040	4839	0.94764	0.80488	1.11573	0.55832	2.89316	FALSE
4	Reaction	DECREASED APPETITE	139	87299	4839	2.62206	2.22551	3.08926	0	2.87249	TRUE
4	Reaction	ASTHENIA	116	166251	4839	1.148	0.95903	1.3742	0.1314	2.39719	FALSE
4	Reaction	ANAEMIA	113	91531	4839	2.03232	1.69358	2.4388	0	2.33519	TRUE
4	Reaction	HYPONATRAEMIA	107	25655	4839	6.88607	5.7072	8.30846	0	2.2112	TRUE
4	Reaction	ADRENAL INSUFFICIENCY	105	2959	4839	60.4895	49.8868	73.3457	0	2.16987	TRUE
4	Reaction	SEPSIS	102	50407	4839	3.33376	2.75079	4.04026	0	2.10787	TRUE
4	Reaction	WEIGHT DECREASED	98	115015	4839	1.40212	1.1525	1.70582	0.00136	2.02521	TRUE
4	Reaction	HYPOTENSION	92	87147	4839	1.73756	1.41904	2.12757	0	1.90122	TRUE
4	Reaction	ALANINE AMINOTRANSFERASE INCREASED	85	34856	4839	4.01926	3.25477	4.96333	0	1.75656	TRUE
4	Reaction	ASPARTATE AMINOTRANSFERASE INCREASED	85	31426	4839	4.45914	3.61087	5.50668	0	1.75656	TRUE
4	Reaction	PNEUMONIA	85	128928	4839	1.08468	0.87854	1.3392	0.42538	1.75656	FALSE
4	Reaction	MUSCULAR WEAKNESS	84	53551	4839	2.58308	2.08929	3.19357	0	1.7359	TRUE
4	Reaction	ENTEROCOLITIS	81	1855	4839	75.0717	60.192	93.6296	0	1.6739	TRUE
4	Reaction	OFF LABEL USE	78	149692	4839	0.85717	0.68777	1.0683	0.18534	1.6119	FALSE
4	Reaction	PAIN	77	231205	4839	0.54775	0.43887	0.68364	0	1.59124	TRUE
4	Reaction	INTESTINAL PERFORATION	75	5252	4839	23.8192	18.9971	29.8654	0	1.54991	TRUE
4	Reaction	RENAL FAILURE ACUTE	71	44749	4839	2.61282	2.07373	3.29205	0	1.46725	TRUE
4	Reaction	HYPOTHYROIDISM	70	12738	4839	9.08521	7.19534	11.4715	0	1.44658	TRUE
4	Reaction	LARGE INTESTINE PERFORATION	66	3256	4839	34.0172	26.7025	43.3355	0	1.36392	TRUE
4	Reaction	BACK PAIN	65	102670	4839	1.04157	0.81806	1.32615	0.70229	1.34325	FALSE
4	Reaction	CONFUSIONAL STATE	64	76769	4839	1.37183	1.07538	1.75001	0.01485	1.32259	TRUE
4	Reaction	ARTHRALGIA	63	154147	4839	0.67225	0.52597	0.8592	0.00083	1.30192	TRUE
4	Reaction	CHILLS	63	53552	4839	1.93651	1.51501	2.47529	0	1.30192	TRUE
4	Reaction	CONSTIPATION	63	80726	4839	1.28414	1.00468	1.64133	0.05211	1.30192	FALSE
4	Reaction	METASTASES TO CENTRAL NERVOUS SYSTEM	63	4640	4839	22.631	17.6775	28.9726	0	1.30192	TRUE
4	Reaction	PRESCRIBED OVERDOSE	63	7523	4839	13.885	10.853	17.7641	0	1.30192	TRUE
4	Reaction	LIPASE INCREASED	62	4129	4839	25.0647	19.5356	32.1587	0	1.28126	TRUE
4	Reaction	MALAISE	61	194484	4839	0.51585	0.40199	0.66198	0	1.26059	TRUE
4	Reaction	PNEUMONITIS	60	8805	4839	11.2807	8.76495	14.5185	0	1.23993	TRUE
4	Reaction	HEPATITIS	59	11781	4839	8.27552	6.41762	10.6713	0	1.21926	TRUE
4	Reaction	GENERAL PHYSICAL HEALTH DETERIORATION	58	41638	4839	2.29344	1.77546	2.96254	0	1.19859	TRUE
4	Reaction	PULMONARY EMBOLISM	58	54859	4839	1.74014	1.34718	2.24772	8e-05	1.19859	TRUE
4	Reaction	HYPOPITUITARISM	57	461	4839	231.973	176.045	305.67	0	1.17793	TRUE
4	Reaction	ADVERSE EVENT	55	44953	4839	2.0141	1.54841	2.61984	0	1.1366	TRUE
4	Reaction	THROMBOCYTOPENIA	54	47092	4839	1.88751	1.44756	2.46118	2e-05	1.11593	TRUE
4	Reaction	ATRIAL FIBRILLATION	52	42363	4839	2.02067	1.54176	2.64834	0	1.0746	TRUE
4	Reaction	DIZZINESS	52	225173	4839	0.37978	0.28981	0.49768	0	1.0746	TRUE
4	Reaction	RENAL FAILURE	52	59607	4839	1.43559	1.0954	1.88143	0.01202	1.0746	TRUE
4	Reaction	RASH MACULO-PAPULAR	51	8773	4839	9.61388	7.31114	12.6419	0	1.05394	TRUE
4	Reaction	HYPOKALAEMIA	50	19848	4839	4.15235	3.15054	5.47271	0	1.03327	TRUE
4	Reaction	SYNCOPE	50	47597	4839	1.72899	1.31211	2.2783	0.00035	1.03327	TRUE
4	Reaction	Acute kidney injury	49	24144	4839	3.3436	2.52991	4.41899	0	1.01261	TRUE
4	Reaction	HYPERTENSION	49	94216	4839	0.85554	0.64748	1.13047	0.31785	1.01261	FALSE
4	Reaction	AUTOIMMUNE HEPATITIS	47	2645	4839	29.7443	22.3214	39.6356	0	0.97128	TRUE
4	Reaction	GASTROINTESTINAL HAEMORRHAGE	45	50253	4839	1.47362	1.10161	1.97125	0.01371	0.92994	TRUE
4	Reaction	RASH PRURITIC	44	22582	4839	3.20983	2.3912	4.30872	0	0.90928	TRUE
4	Reaction	HYPERTHYROIDISM	41	5350	4839	12.6974	9.35036	17.2426	0	0.84728	TRUE
4	Reaction	PAIN IN EXTREMITY	40	137541	4839	0.4783	0.35128	0.65125	0	0.82662	TRUE
4	Reaction	URINARY TRACT INFECTION	40	66114	4839	0.99535	0.73097	1.35533	1	0.82662	FALSE
4	Reaction	PLEURAL EFFUSION	39	30354	4839	2.1152	1.54707	2.89196	3e-05	0.80595	TRUE
4	Reaction	BLOOD BILIRUBIN INCREASED	38	15988	4839	3.91713	2.85273	5.37867	0	0.78529	TRUE
4	Reaction	COUGH	38	102635	4839	0.60897	0.44364	0.83591	0.00112	0.78529	TRUE
4	Reaction	NEUROPATHY PERIPHERAL	38	32447	4839	1.9278	1.40423	2.64659	0.00025	0.78529	TRUE
4	Reaction	RESPIRATORY FAILURE	38	35651	4839	1.75436	1.27792	2.40844	0.00115	0.78529	TRUE
4	Reaction	OEDEMA PERIPHERAL	37	76483	4839	0.79578	0.57724	1.09706	0.18381	0.76462	FALSE
4	Reaction	FALL	36	144247	4839	0.41044	0.29641	0.56834	0	0.74396	TRUE
4	Reaction	VISION BLURRED	36	61643	4839	0.96077	0.6938	1.33045	0.93449	0.74396	FALSE
4	Reaction	MYALGIA	35	78186	4839	0.73634	0.52928	1.0244	0.06812	0.72329	FALSE
4	Reaction	CARDIAC ARREST	34	44811	4839	1.24844	0.89299	1.74539	0.20979	0.70262	FALSE
4	Reaction	INFECTION	34	52911	4839	1.0572	0.75621	1.47799	0.72284	0.70262	FALSE
4	Reaction	PANCREATITIS	34	29276	4839	1.91169	1.3673	2.67282	0.00049	0.70262	TRUE
4	Reaction	ABDOMINAL PAIN UPPER	33	85903	4839	0.63185	0.44969	0.8878	0.00645	0.68196	TRUE
4	Reaction	BLOOD CREATININE INCREASED	33	33009	4839	1.64536	1.17089	2.3121	0.00682	0.68196	TRUE
4	Reaction	NEOPLASM PROGRESSION	33	8214	4839	6.63212	4.71717	9.32445	0	0.68196	TRUE
4	Reaction	HEPATIC ENZYME INCREASED	32	25839	4839	2.03872	1.44307	2.88023	0.00031	0.66129	TRUE
4	Reaction	RECTAL HAEMORRHAGE	31	21698	4839	2.35238	1.65579	3.34202	2e-05	0.64063	TRUE
4	Reaction	INFUSION RELATED REACTION	30	20309	4839	2.43231	1.70207	3.47586	2e-05	0.61996	TRUE
4	Reaction	DEEP VEIN THROMBOSIS	29	41412	4839	1.15218	0.80144	1.65641	0.42301	0.5993	FALSE
4	Reaction	DERMATITIS	29	5939	4839	8.0678	5.60757	11.6074	0	0.5993	TRUE
4	Reaction	HEPATIC FAILURE	29	16258	4839	2.93799	2.04323	4.22459	0	0.5993	TRUE
4	Reaction	MALIGNANT MELANOMA	29	5405	4839	8.86918	6.16402	12.7615	0	0.5993	TRUE
4	Reaction	PLATELET COUNT DECREASED	28	44607	4839	1.0327	0.71371	1.49424	0.84682	0.57863	FALSE
4	Reaction	CHEST PAIN	27	97663	4839	0.45467	0.31212	0.66234	0	0.55797	TRUE
4	Reaction	HEPATOTOXICITY	27	7483	4839	5.95392	4.08457	8.67878	0	0.55797	TRUE
4	Reaction	HYPERGLYCAEMIA	27	17896	4839	2.48432	1.705	3.61986	3e-05	0.55797	TRUE
4	Reaction	LETHARGY	27	29306	4839	1.51619	1.04068	2.20896	0.04188	0.55797	TRUE
4	Reaction	LIVER DISORDER	27	20495	4839	2.16887	1.48856	3.1601	0.00028	0.55797	TRUE
4	Reaction	LUNG INFECTION	27	11176	4839	3.98174	2.73222	5.8027	0	0.55797	TRUE
4	Reaction	BLOOD ALKALINE PHOSPHATASE INCREASED	26	16186	4839	2.64531	1.80241	3.88239	1e-05	0.5373	TRUE
4	Reaction	CONVULSION	26	60370	4839	0.70841	0.48279	1.03946	0.08111	0.5373	FALSE
4	Reaction	ERYTHEMA	26	69879	4839	0.61197	0.41707	0.89795	0.0086	0.5373	TRUE
4	Reaction	TRANSAMINASES INCREASED	26	9299	4839	4.60997	3.14033	6.76738	0	0.5373	TRUE
4	Reaction	UVEITIS	26	3374	4839	12.7683	8.68952	18.7616	0	0.5373	TRUE
4	Reaction	CELLULITIS	25	22835	4839	1.80202	1.21861	2.66475	0.0064	0.51664	TRUE
4	Reaction	CEREBRAL HAEMORRHAGE	25	17593	4839	2.33971	1.58212	3.46008	0.00015	0.51664	TRUE
4	Reaction	COLITIS ULCERATIVE	25	11197	4839	3.6792	2.48748	5.44186	0	0.51664	TRUE
4	Reaction	DIARRHOEA HAEMORRHAGIC	25	3989	4839	10.3693	7.00504	15.3494	0	0.51664	TRUE
4	Reaction	LIVER FUNCTION TEST ABNORMAL	25	20957	4839	1.9637	1.32791	2.90388	0.00178	0.51664	TRUE
4	Reaction	METASTATIC MALIGNANT MELANOMA	25	896	4839	47.1918	31.7418	70.1619	0	0.51664	TRUE
4	Reaction	AUTOIMMUNE DISORDER	24	2268	4839	17.5846	11.7729	26.2654	0	0.49597	TRUE
4	Reaction	GASTROINTESTINAL DISORDER	24	27023	4839	1.46153	0.98041	2.17875	0.08117	0.49597	FALSE
4	Reaction	MULTI-ORGAN FAILURE	24	18510	4839	2.13458	1.43178	3.18235	0.00077	0.49597	TRUE
4	Reaction	THYROIDITIS	24	829	4839	49.0185	32.6934	73.4954	0	0.49597	TRUE
4	Reaction	VITILIGO	24	568	4839	72.5366	48.243	109.064	0	0.49597	TRUE
4	Reaction	Autoimmune colitis	23	98	4839	504.21	316.295	803.768	0	0.4753	TRUE
4	Reaction	DEPRESSION	23	119965	4839	0.31528	0.20971	0.47401	0	0.4753	TRUE
4	Reaction	HYPOAESTHESIA	23	70682	4839	0.53519	0.35597	0.80464	0.00122	0.4753	TRUE
4	Reaction	PANCYTOPENIA	23	24659	4839	1.53498	1.02082	2.3081	0.05022	0.4753	FALSE
4	Reaction	SEPTIC SHOCK	23	17275	4839	2.19196	1.45763	3.29625	0.00087	0.4753	TRUE
4	Reaction	DYSPHAGIA	22	41787	4839	0.86607	0.57074	1.31422	0.61768	0.45464	FALSE
4	Reaction	HAEMATOCHEZIA	22	18841	4839	1.92208	1.26648	2.91705	0.00437	0.45464	TRUE
4	Reaction	HYPOALBUMINAEMIA	22	3484	4839	10.4482	6.87696	15.8739	0	0.45464	TRUE
4	Reaction	RASH GENERALISED	22	20729	4839	1.74683	1.15103	2.65102	0.01503	0.45464	TRUE
4	Reaction	STOMATITIS	22	22411	4839	1.6156	1.06458	2.45182	0.02916	0.45464	TRUE
4	Reaction	ABDOMINAL DISTENSION	21	44765	4839	0.77167	0.50355	1.18255	0.28856	0.43397	FALSE
4	Reaction	AMYLASE INCREASED	21	1433	4839	24.4528	15.9075	37.5885	0	0.43397	TRUE
4	Reaction	EMBOLISM	21	4622	4839	7.50433	4.89261	11.5102	0	0.43397	TRUE
4	Reaction	LYMPHADENOPATHY	21	16159	4839	2.13951	1.39587	3.27931	0.00184	0.43397	TRUE
4	Reaction	LYMPHOCYTE COUNT DECREASED	21	6071	4839	5.70701	3.72168	8.75142	0	0.43397	TRUE
4	Reaction	NEUTROPENIA	21	43670	4839	0.79102	0.51618	1.21222	0.3294	0.43397	FALSE
4	Reaction	SOMNOLENCE	21	88293	4839	0.39115	0.25525	0.59939	0	0.43397	TRUE
4	Reaction	CEREBROVASCULAR ACCIDENT	20	99880	4839	0.32929	0.21263	0.50997	0	0.41331	TRUE
4	Reaction	DIABETES MELLITUS	20	40952	4839	0.80336	0.51871	1.24423	0.36605	0.41331	FALSE
4	Reaction	DISEASE PROGRESSION	20	46236	4839	0.71151	0.45941	1.10196	0.15421	0.41331	FALSE
4	Reaction	DRUG INEFFECTIVE	20	453261	4839	0.07255	0.04685	0.11236	0	0.41331	TRUE
4	Reaction	MUSCLE SPASMS	20	83751	4839	0.39272	0.25358	0.60821	0	0.41331	TRUE
4	Reaction	TOXICITY TO VARIOUS AGENTS	20	45983	4839	0.71543	0.46194	1.10803	0.15338	0.41331	FALSE
4	Reaction	ARTHRITIS	19	31815	4839	0.98248	0.62715	1.53916	1	0.39264	FALSE
4	Reaction	ENDOCRINE DISORDER	19	597	4839	54.0469	34.2517	85.2823	0	0.39264	TRUE
4	Reaction	GAIT DISTURBANCE	19	86232	4839	0.36235	0.23132	0.5676	0	0.39264	TRUE
4	Reaction	HAEMOGLOBIN DECREASED	19	51476	4839	0.60709	0.38754	0.95102	0.02453	0.39264	TRUE
4	Reaction	HEPATOCELLULAR INJURY	19	4607	4839	6.80887	4.34282	10.6753	0	0.39264	TRUE
4	Reaction	HYPERSENSITIVITY	19	70580	4839	0.44272	0.28262	0.69352	6e-05	0.39264	TRUE
4	Reaction	ILEUS	19	6061	4839	5.17032	3.29846	8.10445	0	0.39264	TRUE
4	Reaction	NEUTROPHIL COUNT DECREASED	19	14417	4839	2.16968	1.38474	3.39957	0.00195	0.39264	TRUE
4	Reaction	PARAESTHESIA	19	76635	4839	0.40774	0.26029	0.63871	1e-05	0.39264	TRUE
4	Reaction	BLOOD THYROID STIMULATING HORMONE DECREASED	18	1615	4839	18.5316	11.6553	29.4647	0	0.37198	TRUE
4	Reaction	CARDIAC FAILURE	18	35489	4839	0.83434	0.52606	1.32329	0.51681	0.37198	FALSE
4	Reaction	CLOSTRIDIUM DIFFICILE COLITIS	18	4626	4839	6.42251	4.04625	10.1943	0	0.37198	TRUE
4	Reaction	HYPERHIDROSIS	18	63369	4839	0.46716	0.29456	0.74089	0.00034	0.37198	TRUE
4	Reaction	INTERSTITIAL LUNG DISEASE	18	18587	4839	1.59378	1.00478	2.52805	0.05187	0.37198	FALSE
4	Reaction	LYMPHOCYTIC HYPOPHYSITIS	18	60	4839	704.641	405.954	1223.09	0	0.37198	TRUE
4	Reaction	MYOCARDIAL INFARCTION	18	125804	4839	0.23528	0.14836	0.37313	0	0.37198	TRUE
4	Reaction	VISUAL IMPAIRMENT	18	40525	4839	0.73061	0.46066	1.15876	0.22357	0.37198	FALSE
4	Reaction	DIVERTICULITIS	17	10742	4839	2.60613	1.62086	4.19032	0.00045	0.35131	TRUE
4	Reaction	GASTRITIS	17	13538	4839	2.06721	1.28578	3.32355	0.00727	0.35131	TRUE
4	Reaction	INFLUENZA LIKE ILLNESS	17	44482	4839	0.6286	0.39106	1.01042	0.05303	0.35131	FALSE
4	Reaction	INSOMNIA	17	128002	4839	0.21839	0.13587	0.35102	0	0.35131	TRUE
4	Reaction	OEDEMA	17	26255	4839	1.06528	0.66269	1.71245	0.70735	0.35131	FALSE
4	Reaction	Peripheral swelling	17	38657	4839	0.72336	0.45001	1.16276	0.2131	0.35131	FALSE
4	Reaction	TUBULOINTERSTITIAL NEPHRITIS	17	4827	4839	5.81097	3.6124	9.34762	0	0.35131	TRUE
4	Reaction	BRAIN OEDEMA	16	6175	4839	4.27125	2.61713	6.97081	0	0.33065	TRUE
4	Reaction	ENTEROCOLITIS HAEMORRHAGIC	16	808	4839	33.2154	20.2649	54.442	0	0.33065	TRUE
4	Reaction	MENTAL STATUS CHANGES	16	15561	4839	1.69229	1.03732	2.7608	0.04742	0.33065	TRUE
4	Reaction	OPTIC NEURITIS	16	4942	4839	5.34036	3.27169	8.71702	0	0.33065	TRUE
4	Reaction	PERIPHERAL SENSORY NEUROPATHY	16	2332	4839	11.3586	6.95247	18.5572	0	0.33065	TRUE
4	Reaction	PERITONITIS	16	12704	4839	2.07335	1.27082	3.38266	0.00639	0.33065	TRUE
4	Reaction	SMALL INTESTINAL OBSTRUCTION	16	5441	4839	4.84914	2.97097	7.91464	0	0.33065	TRUE
4	Reaction	TACHYCARDIA	16	39218	4839	0.67105	0.4114	1.09459	0.12219	0.33065	FALSE
4	Reaction	TREMOR	16	81152	4839	0.32423	0.19878	0.52884	0	0.33065	TRUE
4	Reaction	C-REACTIVE PROTEIN INCREASED	15	13447	4839	1.8361	1.10747	3.04411	0.0322	0.30998	TRUE
4	Reaction	CONJUNCTIVITIS	15	5190	4839	4.76569	2.87319	7.90472	0	0.30998	TRUE
4	Reaction	GUILLAIN-BARRE SYNDROME	15	1970	4839	12.6151	7.59634	20.9495	0	0.30998	TRUE
4	Reaction	HYPOPHOSPHATAEMIA	15	2939	4839	8.43449	5.08221	13.998	0	0.30998	TRUE
4	Reaction	SKIN DISORDER	15	12517	4839	1.97268	1.18982	3.27063	0.0157	0.30998	TRUE
4	Reaction	ABDOMINAL DISCOMFORT	14	57474	4839	0.4006	0.23742	0.67593	9e-05	0.28932	TRUE
4	Reaction	BLOOD LACTATE DEHYDROGENASE INCREASED	14	10358	4839	2.22528	1.31845	3.75583	0.00724	0.28932	TRUE
4	Reaction	COMA	14	21922	4839	1.05068	0.62263	1.77301	0.78335	0.28932	FALSE
4	Reaction	Clostridium difficile infection	14	6320	4839	3.65022	2.16221	6.16225	5e-05	0.28932	TRUE
4	Reaction	GASTROINTESTINAL PERFORATION	14	2040	4839	11.3614	6.72171	19.2038	0	0.28932	TRUE
4	Reaction	HERPES ZOSTER	14	22793	4839	1.0105	0.59883	1.7052	0.89281	0.28932	FALSE
4	Reaction	HYPOXIA	14	14660	4839	1.57164	0.93127	2.65235	0.0917	0.28932	FALSE
4	Reaction	RENAL IMPAIRMENT	14	30153	4839	0.76374	0.45261	1.28874	0.41029	0.28932	FALSE
4	Reaction	TRANSFUSION	14	4687	4839	4.9258	2.91721	8.31737	0	0.28932	TRUE
4	Reaction	URTICARIA	14	65597	4839	0.35098	0.20801	0.59221	0	0.28932	TRUE
4	Reaction	VISUAL ACUITY REDUCED	14	25817	4839	0.89208	0.52866	1.50533	0.79985	0.28932	FALSE
4	Reaction	CHROMATURIA	13	11405	4839	1.87624	1.0899	3.22991	0.03283	0.26865	TRUE
4	Reaction	DELIRIUM	13	14437	4839	1.48184	0.86085	2.5508	0.17105	0.26865	FALSE
4	Reaction	DRUG-INDUCED LIVER INJURY	13	6447	4839	3.32206	1.9293	5.72023	0.00022	0.26865	TRUE
4	Reaction	ENTERITIS	13	2035	4839	10.5708	6.1317	18.2236	0	0.26865	TRUE
4	Reaction	HYPERCALCAEMIA	13	5321	4839	4.02677	2.3383	6.93448	3e-05	0.26865	TRUE
4	Reaction	METASTASES TO LUNG	13	4340	4839	4.93971	2.868	8.50793	0	0.26865	TRUE
4	Reaction	OROPHARYNGEAL PAIN	13	36281	4839	0.58934	0.34242	1.01432	0.05378	0.26865	FALSE
4	Reaction	SARCOIDOSIS	13	2049	4839	10.4981	6.08961	18.098	0	0.26865	TRUE
4	Reaction	TUMOUR HAEMORRHAGE	13	1116	4839	19.3782	11.2242	33.4556	0	0.26865	TRUE
4	Reaction	ACUTE HEPATIC FAILURE	12	5431	4839	3.64088	2.06783	6.41061	0.00017	0.24799	TRUE
4	Reaction	ADVERSE DRUG REACTION	12	24883	4839	0.79329	0.45077	1.39609	0.51843	0.24799	FALSE
4	Reaction	ASCITES	12	14005	4839	1.40999	0.80111	2.48165	0.22575	0.24799	FALSE
4	Reaction	BLOOD PRESSURE INCREASED	12	64593	4839	0.30551	0.17361	0.53761	0	0.24799	TRUE
4	Reaction	CHOLESTASIS	12	7435	4839	2.65795	1.50983	4.67913	0.00247	0.24799	TRUE
4	Reaction	EOSINOPHILIA	12	6629	4839	2.98171	1.69364	5.24938	0.00096	0.24799	TRUE
4	Reaction	HYPERKALAEMIA	12	15461	4839	1.2771	0.72562	2.24772	0.40955	0.24799	FALSE
4	Reaction	HYPOCALCAEMIA	12	8022	4839	2.46316	1.39923	4.33609	0.00447	0.24799	TRUE
4	Reaction	JAUNDICE	12	16246	4839	1.21535	0.69054	2.139	0.42681	0.24799	FALSE
4	Reaction	MYOCARDITIS	12	2713	4839	7.30468	4.14606	12.8697	0	0.24799	TRUE
4	Reaction	NASOPHARYNGITIS	12	67912	4839	0.29057	0.16513	0.51133	0	0.24799	TRUE
4	Reaction	NEOPLASM	12	4792	4839	4.1276	2.34406	7.2682	5e-05	0.24799	TRUE
4	Reaction	OVERDOSE	12	64504	4839	0.30593	0.17385	0.53835	0	0.24799	TRUE
4	Reaction	TYPE 1 DIABETES MELLITUS	12	2436	4839	8.13942	4.61918	14.3424	0	0.24799	TRUE
4	Reaction	VIITH NERVE PARALYSIS	12	3678	4839	5.38187	3.0557	9.47886	0	0.24799	TRUE
4	Reaction	ACUTE MYOCARDIAL INFARCTION	11	18242	4839	0.99203	0.54965	1.79046	1	0.22732	FALSE
4	Reaction	ADRENOCORTICAL INSUFFICIENCY ACUTE	11	595	4839	30.9688	17.067	56.1944	0	0.22732	TRUE
4	Reaction	ANXIETY	11	129403	4839	0.13978	0.07746	0.25223	0	0.22732	TRUE
4	Reaction	BALANCE DISORDER	11	40220	4839	0.44979	0.24924	0.81172	0.00422	0.22732	TRUE
4	Reaction	BLOOD CORTISOL DECREASED	11	701	4839	26.2113	14.4573	47.5213	0	0.22732	TRUE
4	Reaction	BLOOD SODIUM DECREASED	11	9567	4839	1.89261	1.04846	3.4164	0.05556	0.22732	FALSE
4	Reaction	BLOOD THYROID STIMULATING HORMONE INCREASED	11	3189	4839	5.69093	3.1505	10.2799	1e-05	0.22732	TRUE
4	Reaction	GASTROENTERITIS	11	7037	4839	2.57412	1.42583	4.64718	0.00461	0.22732	TRUE
4	Reaction	HAEMATURIA	11	17114	4839	1.05746	0.5859	1.90857	0.75628	0.22732	FALSE
4	Reaction	HEPATIC FUNCTION ABNORMAL	11	15901	4839	1.13819	0.63062	2.05429	0.62666	0.22732	FALSE
4	Reaction	HYPOGLYCAEMIA	11	25092	4839	0.7211	0.39956	1.30139	0.36649	0.22732	FALSE
4	Reaction	HYPOTHALAMO-PITUITARY DISORDER	11	466	4839	39.749	21.8715	72.2392	0	0.22732	TRUE
4	Reaction	INAPPROPRIATE ANTIDIURETIC HORMONE SECRETION	11	4373	4839	4.14621	2.29598	7.48747	0.0001	0.22732	TRUE
4	Reaction	INTESTINAL OBSTRUCTION	11	14310	4839	1.26483	0.70077	2.28292	0.39368	0.22732	FALSE
4	Reaction	LEUKOCYTOSIS	11	8781	4839	2.06223	1.1424	3.7227	0.0256	0.22732	TRUE
4	Reaction	LOSS OF CONSCIOUSNESS	11	64076	4839	0.2823	0.15644	0.50945	0	0.22732	TRUE
4	Reaction	LOWER GASTROINTESTINAL HAEMORRHAGE	11	3797	4839	4.77702	2.64499	8.62759	3e-05	0.22732	TRUE
4	Reaction	LOWER RESPIRATORY TRACT INFECTION	11	13471	4839	1.34367	0.74444	2.42525	0.29211	0.22732	FALSE
4	Reaction	LUNG DISORDER	11	19962	4839	0.90651	0.50228	1.63607	0.88554	0.22732	FALSE
4	Reaction	METASTASES TO LIVER	11	6957	4839	2.60377	1.44225	4.70073	0.00424	0.22732	TRUE
4	Reaction	MYOSITIS	11	3748	4839	4.83965	2.67964	8.74081	3e-05	0.22732	TRUE
4	Reaction	NERVOUS SYSTEM DISORDER	11	21102	4839	0.85751	0.47513	1.54763	0.77855	0.22732	FALSE
4	Reaction	NIGHT SWEATS	11	13184	4839	1.37294	0.76065	2.4781	0.28385	0.22732	FALSE
4	Reaction	OCULAR HYPERAEMIA	11	16292	4839	1.11085	0.61547	2.00495	0.63354	0.22732	FALSE
4	Reaction	PERICARDIAL EFFUSION	11	10008	4839	1.80912	1.00223	3.26564	0.06209	0.22732	FALSE
4	Reaction	PULMONARY OEDEMA	11	21845	4839	0.82833	0.45897	1.49496	0.6786	0.22732	FALSE
4	Reaction	RASH ERYTHEMATOUS	11	17448	4839	1.03721	0.57468	1.872	0.87692	0.22732	FALSE
4	Reaction	SKIN INFECTION	11	3850	4839	4.71107	2.60851	8.50838	3e-05	0.22732	TRUE
4	Reaction	THROMBOSIS	11	38265	4839	0.47278	0.26198	0.85321	0.00882	0.22732	TRUE
4	Reaction	WHITE BLOOD CELL COUNT INCREASED	11	21523	4839	0.84073	0.46583	1.51734	0.67766	0.22732	FALSE
4	Reaction	BLINDNESS	10	16703	4839	0.98494	0.53019	1.82975	1	0.20665	FALSE
4	Reaction	BLOOD GLUCOSE INCREASED	10	96809	4839	0.16985	0.09144	0.31549	0	0.20665	TRUE
4	Reaction	BRONCHITIS	10	36079	4839	0.45584	0.2454	0.84674	0.00712	0.20665	TRUE
4	Reaction	COLECTOMY	10	2190	4839	7.54203	4.05481	14.0283	0	0.20665	TRUE
4	Reaction	DEAFNESS	10	10435	4839	1.57713	0.84887	2.9302	0.1575	0.20665	FALSE
4	Reaction	DIPLOPIA	10	12115	4839	1.35825	0.73109	2.52343	0.35007	0.20665	FALSE
4	Reaction	DRY SKIN	10	22794	4839	0.72163	0.38847	1.34052	0.34728	0.20665	FALSE
4	Reaction	HAEMORRHAGE	10	47597	4839	0.34551	0.18601	0.64178	8e-05	0.20665	TRUE
4	Reaction	HAEMORRHOIDS	10	9523	4839	1.72833	0.93022	3.21121	0.09067	0.20665	FALSE
4	Reaction	HEPATOMEGALY	10	5828	4839	2.82599	1.52069	5.25173	0.00358	0.20665	TRUE
4	Reaction	HOSPITALISATION	10	41233	4839	0.39885	0.21472	0.74086	0.00122	0.20665	TRUE
4	Reaction	HYPOPHAGIA	10	10597	4839	1.553	0.83588	2.88535	0.16222	0.20665	FALSE
4	Reaction	MELAENA	10	10764	4839	1.52888	0.8229	2.84053	0.16767	0.20665	FALSE
4	Reaction	MUCOSAL INFLAMMATION	10	10848	4839	1.51704	0.81653	2.81851	0.17062	0.20665	FALSE
4	Reaction	MUSCULOSKELETAL PAIN	10	30382	4839	0.54134	0.29143	1.00558	0.04661	0.20665	TRUE
4	Reaction	Pneumocystis jirovecii pneumonia	10	2196	4839	7.52133	4.0437	13.9898	0	0.20665	TRUE
4	Reaction	SINUS TACHYCARDIA	10	7436	4839	2.21406	1.19154	4.11407	0.01748	0.20665	TRUE
4	Reaction	SINUSITIS	10	42459	4839	0.38733	0.20852	0.71946	0.00071	0.20665	TRUE
4	Reaction	STAPHYLOCOCCAL INFECTION	10	18353	4839	0.89634	0.4825	1.66513	0.88058	0.20665	FALSE
4	Reaction	SURGERY	10	20902	4839	0.78698	0.42364	1.46194	0.57239	0.20665	FALSE
4	Reaction	Seizure	10	25843	4839	0.63646	0.34262	1.18228	0.16445	0.20665	FALSE
4	Reaction	UPPER GASTROINTESTINAL HAEMORRHAGE	10	7700	4839	2.13805	1.15065	3.97277	0.03081	0.20665	TRUE
4	Reaction	WHITE BLOOD CELL COUNT DECREASED	10	42540	4839	0.38659	0.20812	0.71809	0.00072	0.20665	TRUE
4	Reaction	AMNESIA	9	33736	4839	0.43874	0.2284	0.8428	0.00747	0.18599	TRUE
4	Reaction	APHASIA	9	14657	4839	1.0102	0.52583	1.94076	0.86683	0.18599	FALSE
4	Reaction	BLOOD TESTOSTERONE DECREASED	9	4790	4839	3.09506	1.61037	5.94854	0.00312	0.18599	TRUE
4	Reaction	CYSTITIS	9	14476	4839	1.02284	0.53241	1.96504	0.86541	0.18599	FALSE
4	Reaction	DIABETIC KETOACIDOSIS	9	8928	4839	1.65909	0.86348	3.18779	0.12752	0.18599	FALSE
4	Reaction	DISORIENTATION	9	22101	4839	0.66981	0.34867	1.28672	0.27319	0.18599	FALSE
4	Reaction	DISSEMINATED INTRAVASCULAR COAGULATION	9	8420	4839	1.7593	0.91561	3.38039	0.11243	0.18599	FALSE
4	Reaction	DYSGEUSIA	9	38684	4839	0.38261	0.19918	0.73496	0.00122	0.18599	TRUE
4	Reaction	ELECTROLYTE IMBALANCE	9	4651	4839	3.18773	1.65856	6.12678	0.00257	0.18599	TRUE
4	Reaction	ENCEPHALOPATHY	9	10511	4839	1.40901	0.73336	2.70715	0.31471	0.18599	FALSE
4	Reaction	FAILURE TO THRIVE	9	3215	4839	4.61555	2.40077	8.87354	0.0002	0.18599	TRUE
4	Reaction	FEBRILE NEUTROPENIA	9	24262	4839	0.61013	0.31761	1.17206	0.15057	0.18599	FALSE
4	Reaction	HEART RATE INCREASED	9	44877	4839	0.3298	0.17169	0.63351	0.0001	0.18599	TRUE
4	Reaction	HYPERPYREXIA	9	1318	4839	11.3044	5.87216	21.7619	0	0.18599	TRUE
4	Reaction	PERIPHERAL MOTOR NEUROPATHY	9	647	4839	23.1935	12.0198	44.7546	0	0.18599	TRUE
4	Reaction	Product use issue	9	62976	4839	0.235	0.12234	0.45141	0	0.18599	TRUE
4	Reaction	RASH MACULAR	9	12068	4839	1.22709	0.6387	2.35753	0.45973	0.18599	FALSE
4	Reaction	TUMOUR LYSIS SYNDROME	9	2853	4839	5.20305	2.70604	10.0042	8e-05	0.18599	TRUE
4	Reaction	TUMOUR PAIN	9	420	4839	36.0036	18.6114	69.6487	0	0.18599	TRUE
4	Reaction	VERTIGO	9	27119	4839	0.54583	0.28414	1.04853	0.06364	0.18599	FALSE
4	Reaction	ACUTE FEBRILE NEUTROPHILIC DERMATOSIS	8	924	4839	14.3595	7.1635	28.7842	0	0.16532	TRUE
4	Reaction	ACUTE RESPIRATORY DISTRESS SYNDROME	8	8205	4839	1.60465	0.80266	3.20796	0.17263	0.16532	FALSE
4	Reaction	ACUTE RESPIRATORY FAILURE	8	6904	4839	1.90738	0.95403	3.81341	0.07857	0.16532	FALSE
4	Reaction	ALOPECIA	8	60378	4839	0.21788	0.10902	0.43545	0	0.16532	TRUE
4	Reaction	BLOOD CORTICOTROPHIN DECREASED	8	162	4839	85.4111	41.9844	173.756	0	0.16532	TRUE
4	Reaction	CARDIO-RESPIRATORY ARREST	8	24123	4839	0.54544	0.2729	1.09018	0.08767	0.16532	FALSE
4	Reaction	CHOLECYSTITIS	8	6558	4839	2.00814	1.0044	4.01494	0.06871	0.16532	FALSE
4	Reaction	CONDITION AGGRAVATED	8	89912	4839	0.1463	0.0732	0.2924	0	0.16532	TRUE
4	Reaction	Chronic kidney disease	8	4069	4839	3.23893	1.61958	6.47739	0.00396	0.16532	TRUE
4	Reaction	DRY MOUTH	8	36573	4839	0.35972	0.17998	0.71896	0.0009	0.16532	TRUE
4	Reaction	ENCEPHALITIS	8	2751	4839	4.79522	2.397	9.59289	0.00034	0.16532	TRUE
4	Reaction	ENTEROCOLITIS INFECTIOUS	8	602	4839	22.1436	11.0287	44.4602	0	0.16532	TRUE
4	Reaction	EPISTAXIS	8	33301	4839	0.39508	0.19767	0.78962	0.00352	0.16532	TRUE
4	Reaction	ERYSIPELAS	8	2070	4839	6.3789	3.18758	12.7653	5e-05	0.16532	TRUE
4	Reaction	EXTRAVASATION	8	2266	4839	5.8252	2.91123	11.6559	9e-05	0.16532	TRUE
4	Reaction	FLATULENCE	8	25020	4839	0.52588	0.26311	1.05108	0.07026	0.16532	FALSE
4	Reaction	GAMMA-GLUTAMYLTRANSFERASE INCREASED	8	13518	4839	0.9736	0.48707	1.94612	1	0.16532	FALSE
4	Reaction	GASTRIC HAEMORRHAGE	8	6265	4839	2.10217	1.05142	4.20303	0.06254	0.16532	FALSE
4	Reaction	GASTROINTESTINAL NECROSIS	8	1640	4839	8.05962	4.02602	16.1344	1e-05	0.16532	TRUE
4	Reaction	HAEMOPTYSIS	8	13119	4839	1.00323	0.50189	2.00536	0.85985	0.16532	FALSE
4	Reaction	HYPERURICAEMIA	8	2060	4839	6.40999	3.20309	12.8276	5e-05	0.16532	TRUE
4	Reaction	INFLAMMATION	8	17032	4839	0.77263	0.38655	1.54435	0.63806	0.16532	FALSE
4	Reaction	INTRACRANIAL TUMOUR HAEMORRHAGE	8	181	4839	76.0306	37.4457	154.375	0	0.16532	TRUE
4	Reaction	Immune thrombocytopenic purpura	8	1345	4839	9.83792	4.91249	19.7018	0	0.16532	TRUE
4	Reaction	LOCAL SWELLING	8	19238	4839	0.684	0.34221	1.36716	0.37643	0.16532	FALSE
4	Reaction	MYOPATHY	8	4086	4839	3.22543	1.61284	6.45037	0.00406	0.16532	TRUE
4	Reaction	PITUITARY ENLARGEMENT	8	104	4839	137.014	66.6444	281.685	0	0.16532	TRUE
4	Reaction	PRURITUS GENERALISED	8	16499	4839	0.7976	0.39904	1.59427	0.63564	0.16532	FALSE
4	Reaction	RHEUMATOID ARTHRITIS	8	35355	4839	0.37212	0.18619	0.74373	0.00157	0.16532	TRUE
4	Reaction	SKIN DISCOLOURATION	8	19255	4839	0.68339	0.34191	1.36595	0.37657	0.16532	FALSE
4	Reaction	SUDDEN DEATH	8	7176	4839	1.835	0.91784	3.66865	0.08821	0.16532	FALSE
4	Reaction	SWELLING	8	33663	4839	0.39083	0.19555	0.78113	0.00362	0.16532	TRUE
4	Reaction	THYROID DISORDER	8	6468	4839	2.03611	1.01839	4.0709	0.0666	0.16532	FALSE
4	Reaction	VENTRICULAR TACHYCARDIA	8	8608	4839	1.52945	0.76506	3.05758	0.26477	0.16532	FALSE
4	Reaction	VIRAL INFECTION	8	13985	4839	0.94107	0.4708	1.88109	1	0.16532	FALSE
4	Reaction	ABDOMINAL SEPSIS	7	413	4839	28.3476	13.4356	59.8105	0	0.14466	TRUE
4	Reaction	AGRANULOCYTOSIS	7	6811	4839	1.69153	0.80652	3.54765	0.20731	0.14466	FALSE
4	Reaction	ARRHYTHMIA	7	24398	4839	0.47186	0.22505	0.98936	0.03681	0.14466	TRUE
4	Reaction	AUTOIMMUNE THYROIDITIS	7	1312	4839	8.81926	4.1983	18.5264	2e-05	0.14466	TRUE
4	Reaction	BLOOD CREATINE PHOSPHOKINASE INCREASED	7	18243	4839	0.63112	0.30099	1.32334	0.28936	0.14466	FALSE
4	Reaction	CARDIOPULMONARY FAILURE	7	2361	4839	4.88918	2.32949	10.2615	0.00071	0.14466	TRUE
4	Reaction	CHOLELITHIASIS	7	19137	4839	0.60163	0.28693	1.26149	0.23637	0.14466	FALSE
4	Reaction	CYTOLYTIC HEPATITIS	7	3634	4839	3.17318	1.51247	6.65737	0.00758	0.14466	TRUE
4	Reaction	CYTOMEGALOVIRUS COLITIS	7	551	4839	21.1565	10.0434	44.5662	0	0.14466	TRUE
4	Reaction	DEPRESSED LEVEL OF CONSCIOUSNESS	7	18667	4839	0.61678	0.29415	1.29327	0.23376	0.14466	FALSE
4	Reaction	DRUG DOSE OMISSION	7	123668	4839	0.09307	0.04439	0.19513	0	0.14466	TRUE
4	Reaction	DYSPNOEA EXERTIONAL	7	12692	4839	0.9073	0.43268	1.90256	1	0.14466	FALSE
4	Reaction	EYE DISORDER	7	13270	4839	0.86776	0.41383	1.81963	0.86029	0.14466	FALSE
4	Reaction	FLUSHING	7	58352	4839	0.19726	0.09409	0.41358	0	0.14466	TRUE
4	Reaction	Facial paralysis	7	1415	4839	8.1741	3.89174	17.1687	3e-05	0.14466	TRUE
4	Reaction	GASTROINTESTINAL TOXICITY	7	1350	4839	8.56972	4.07973	18.0012	2e-05	0.14466	TRUE
4	Reaction	GENERALISED OEDEMA	7	6240	4839	1.84648	0.88038	3.87278	0.11256	0.14466	FALSE
4	Reaction	GROIN PAIN	7	4190	4839	2.75141	1.31156	5.77193	0.01548	0.14466	TRUE
4	Reaction	HAEMATEMESIS	7	13017	4839	0.88464	0.42187	1.85502	1	0.14466	FALSE
4	Reaction	HAEMORRHAGE INTRACRANIAL	7	7945	4839	1.44988	0.69134	3.04068	0.35275	0.14466	FALSE
4	Reaction	HYPERBILIRUBINAEMIA	7	4405	4839	2.6169	1.24748	5.4896	0.0197	0.14466	TRUE
4	Reaction	INFLUENZA	7	36645	4839	0.31413	0.14982	0.65863	0.00039	0.14466	TRUE
4	Reaction	IRIDOCYCLITIS	7	894	4839	12.9754	6.17098	27.2825	0	0.14466	TRUE
4	Reaction	LARGE INTESTINAL HAEMORRHAGE	7	990	4839	11.7082	5.56991	24.6111	0	0.14466	TRUE
4	Reaction	LARGE INTESTINAL ULCER	7	1211	4839	9.55909	4.54972	20.0839	1e-05	0.14466	TRUE
4	Reaction	LUNG INFILTRATION	7	6495	4839	1.77391	0.84579	3.72051	0.12441	0.14466	FALSE
4	Reaction	LYMPHOPENIA	7	4868	4839	2.36765	1.12873	4.96645	0.03139	0.14466	TRUE
4	Reaction	Liver function test increased	7	2374	4839	4.86233	2.31671	10.2051	0.00074	0.14466	TRUE
4	Reaction	MEGACOLON	7	727	4839	15.9849	7.59717	33.6332	0	0.14466	TRUE
4	Reaction	MENINGITIS	7	3206	4839	3.59773	1.71467	7.54879	0.00393	0.14466	TRUE
4	Reaction	MYASTHENIA GRAVIS	7	1629	4839	7.09565	3.3791	14.8999	8e-05	0.14466	TRUE
4	Reaction	OESOPHAGITIS	7	5774	4839	1.99569	0.95148	4.18586	0.09574	0.14466	FALSE
4	Reaction	POLYNEUROPATHY	7	3693	4839	3.12239	1.48828	6.55073	0.00824	0.14466	TRUE
4	Reaction	SKIN TOXICITY	7	1630	4839	7.09127	3.37702	14.8907	8e-05	0.14466	TRUE
4	Reaction	SLEEP DISORDER	7	24756	4839	0.46503	0.22179	0.97505	0.03727	0.14466	TRUE
4	Reaction	SQUAMOUS CELL CARCINOMA	7	4087	4839	2.82087	1.34465	5.91774	0.0137	0.14466	TRUE
4	Reaction	THERAPEUTIC RESPONSE DECREASED	7	25836	4839	0.44559	0.21252	0.93428	0.02229	0.14466	TRUE
4	Reaction	UPPER RESPIRATORY TRACT INFECTION	7	19487	4839	0.59082	0.28177	1.23882	0.18892	0.14466	FALSE
4	Reaction	WEIGHT INCREASED	7	93623	4839	0.12294	0.05864	0.25775	0	0.14466	TRUE
4	Reaction	WOUND INFECTION	7	3888	4839	2.96551	1.41355	6.22137	0.01069	0.14466	TRUE
4	Reaction	ABDOMINAL ABSCESS	6	1918	4839	5.15951	2.31617	11.4933	0.00129	0.12399	TRUE
4	Reaction	ANAPHYLACTIC REACTION	6	20562	4839	0.47991	0.21568	1.06783	0.06473	0.12399	FALSE
4	Reaction	ATELECTASIS	6	6205	4839	1.59138	0.71501	3.54189	0.2898	0.12399	FALSE
4	Reaction	BASEDOW'S DISEASE	6	1155	4839	8.58571	3.85103	19.1415	9e-05	0.12399	TRUE
4	Reaction	BLINDNESS UNILATERAL	6	6702	4839	1.47326	0.66196	3.2789	0.31256	0.12399	FALSE
4	Reaction	BONE MARROW FAILURE	6	10233	4839	0.9646	0.43346	2.14656	1	0.12399	FALSE
4	Reaction	BONE PAIN	6	26233	4839	0.37614	0.16905	0.83691	0.00796	0.12399	TRUE
4	Reaction	CAPILLARY LEAK SYNDROME	6	722	4839	13.7779	6.17215	30.756	1e-05	0.12399	TRUE
4	Reaction	CARDIAC FAILURE CONGESTIVE	6	58893	4839	0.16752	0.0753	0.37272	0	0.12399	TRUE
4	Reaction	CARDIOMYOPATHY	6	8125	4839	1.21505	0.54597	2.70405	0.64679	0.12399	FALSE
4	Reaction	CHEST DISCOMFORT	6	42857	4839	0.23022	0.10347	0.51221	0	0.12399	TRUE
4	Reaction	CLOSTRIDIAL INFECTION	6	3094	4839	3.19462	1.43479	7.11293	0.01259	0.12399	TRUE
4	Reaction	CLOSTRIDIUM TEST POSITIVE	6	747	4839	13.3131	5.96459	29.715	1e-05	0.12399	TRUE
4	Reaction	COAGULOPATHY	6	9243	4839	1.06798	0.47991	2.37668	0.8305	0.12399	FALSE
4	Reaction	COGNITIVE DISORDER	6	19295	4839	0.51143	0.22985	1.13797	0.10584	0.12399	FALSE
4	Reaction	COLITIS MICROSCOPIC	6	1044	4839	9.50383	4.2619	21.1931	5e-05	0.12399	TRUE
4	Reaction	DIABETES INSIPIDUS	6	1031	4839	9.62437	4.31582	21.4625	5e-05	0.12399	TRUE
4	Reaction	DRUG ERUPTION	6	7594	4839	1.30008	0.58417	2.89333	0.47768	0.12399	FALSE
4	Reaction	DRUG INTERACTION	6	70743	4839	0.13946	0.06268	0.31028	0	0.12399	TRUE
4	Reaction	DYSPEPSIA	6	43861	4839	0.22495	0.1011	0.50049	0	0.12399	TRUE
4	Reaction	EPILEPSY	6	12113	4839	0.81482	0.36617	1.81317	0.8522	0.12399	FALSE
4	Reaction	EXTRAOCULAR MUSCLE DISORDER	6	188	4839	54.2032	24.0462	122.181	0	0.12399	TRUE
4	Reaction	EYE PAIN	6	19585	4839	0.50385	0.22644	1.12112	0.10716	0.12399	FALSE
4	Reaction	FEELING COLD	6	12953	4839	0.76195	0.34242	1.69551	0.71858	0.12399	FALSE
4	Reaction	FREQUENT BOWEL MOVEMENTS	6	7768	4839	1.27093	0.57108	2.82845	0.48522	0.12399	FALSE
4	Reaction	GENERAL PHYSICAL CONDITION ABNORMAL	6	2454	4839	4.02981	1.80953	8.97435	0.00432	0.12399	TRUE
4	Reaction	HISTIOCYTOSIS HAEMATOPHAGIC	6	2528	4839	3.91157	1.75649	8.71077	0.00497	0.12399	TRUE
4	Reaction	IMMUNE SYSTEM DISORDER	6	4974	4839	1.9857	0.8921	4.41994	0.13472	0.12399	FALSE
4	Reaction	LYMPHOEDEMA	6	2531	4839	3.90692	1.7544	8.70041	0.005	0.12399	TRUE
4	Reaction	MALNUTRITION	6	5243	4839	1.88371	0.8463	4.19281	0.14501	0.12399	FALSE
4	Reaction	MENINGITIS ASEPTIC	6	1714	4839	5.77575	2.59242	12.868	0.00073	0.12399	TRUE
4	Reaction	METABOLIC ACIDOSIS	6	12094	4839	0.8161	0.36674	1.81602	0.85212	0.12399	FALSE
4	Reaction	MYELITIS	6	560	4839	17.8068	7.96922	39.7884	0	0.12399	TRUE
4	Reaction	Multiple organ dysfunction syndrome	6	3383	4839	2.92122	1.31209	6.50378	0.01862	0.12399	TRUE
4	Reaction	NECK PAIN	6	24676	4839	0.39988	0.17972	0.88974	0.01364	0.12399	TRUE
4	Reaction	NEPHRITIS	6	1156	4839	8.57824	3.84769	19.1248	9e-05	0.12399	TRUE
4	Reaction	NEUROLOGICAL SYMPTOM	6	2669	4839	3.70446	1.66357	8.24914	0.00641	0.12399	TRUE
4	Reaction	ORAL PAIN	6	10228	4839	0.96507	0.43368	2.14761	1	0.12399	FALSE
4	Reaction	ORGANISING PNEUMONIA	6	1531	4839	6.46884	2.90302	14.4146	0.00041	0.12399	TRUE
4	Reaction	PALPITATIONS	6	53232	4839	0.18534	0.0833	0.41237	0	0.12399	TRUE
4	Reaction	PERICARDITIS	6	3796	4839	2.6029	1.1692	5.79461	0.03029	0.12399	TRUE
4	Reaction	PHOTOSENSITIVITY REACTION	6	7067	4839	1.39711	0.62775	3.10935	0.33455	0.12399	FALSE
4	Reaction	PSEUDOMEMBRANOUS COLITIS	6	1300	4839	7.62363	3.4203	16.9926	0.00017	0.12399	TRUE
4	Reaction	PYELONEPHRITIS	6	3661	4839	2.69904	1.21236	6.00878	0.02606	0.12399	TRUE
4	Reaction	RESPIRATORY ARREST	6	18738	4839	0.52664	0.23668	1.17182	0.13489	0.12399	FALSE
4	Reaction	SKIN ULCER	6	11017	4839	0.89592	0.40261	1.99368	1	0.12399	FALSE
4	Reaction	SUPRAVENTRICULAR TACHYCARDIA	6	5146	4839	1.91926	0.86226	4.27197	0.14096	0.12399	FALSE
4	Reaction	SWELLING FACE	6	29629	4839	0.33302	0.14967	0.74096	0.00196	0.12399	TRUE
4	Reaction	THYROID FUNCTION TEST ABNORMAL	6	2257	4839	4.38249	1.96773	9.76059	0.00289	0.12399	TRUE
4	Reaction	TOXIC SKIN ERUPTION	6	4499	4839	2.19563	0.98636	4.88747	0.05945	0.12399	FALSE
4	Reaction	URINARY RETENTION	6	14654	4839	0.67347	0.30266	1.49858	0.40287	0.12399	FALSE
4	Reaction	WHEEZING	6	19150	4839	0.5153	0.23159	1.1466	0.10553	0.12399	FALSE
4	Reaction	ABDOMINAL PAIN LOWER	5	12496	4839	0.65814	0.27401	1.58079	0.4653	0.10333	FALSE
4	Reaction	AGEUSIA	5	11044	4839	0.74471	0.31004	1.78875	0.69718	0.10333	FALSE
4	Reaction	ANGINA UNSTABLE	5	4911	4839	1.67567	0.69745	4.02588	0.23258	0.10333	FALSE
4	Reaction	ATAXIA	5	5991	4839	1.37334	0.57166	3.29926	0.42297	0.10333	FALSE
4	Reaction	ATRIAL FLUTTER	5	4073	4839	2.02085	0.84105	4.85564	0.10549	0.10333	FALSE
4	Reaction	BACTERAEMIA	5	4471	4839	1.84076	0.76613	4.42271	0.20554	0.10333	FALSE
4	Reaction	BLOOD POTASSIUM DECREASED	5	14401	4839	0.57105	0.23775	1.37157	0.3047	0.10333	FALSE
4	Reaction	BLOOD PRESSURE DECREASED	5	31060	4839	0.26472	0.11022	0.63576	0.0003	0.10333	TRUE
4	Reaction	CACHEXIA	5	2395	4839	3.43967	1.431	8.26788	0.01652	0.10333	TRUE
4	Reaction	CEREBRAL ISCHAEMIA	5	3459	4839	2.38008	0.99046	5.71936	0.06228	0.10333	FALSE
4	Reaction	CHRONIC OBSTRUCTIVE PULMONARY DISEASE	5	24539	4839	0.33508	0.13952	0.80476	0.00595	0.10333	TRUE
4	Reaction	CONTUSION	5	41712	4839	0.19711	0.08207	0.47338	0	0.10333	TRUE
4	Reaction	DERMATOMYOSITIS	5	867	4839	9.53691	3.96119	22.9609	0.00022	0.10333	TRUE
4	Reaction	DRUG ADMINISTRATION ERROR	5	27826	4839	0.29549	0.12304	0.70967	0.00138	0.10333	TRUE
4	Reaction	DRUG INTOLERANCE	5	23056	4839	0.35664	0.14849	0.85654	0.01043	0.10333	TRUE
4	Reaction	EATING DISORDER	5	9050	4839	0.90888	0.37837	2.18318	1	0.10333	FALSE
4	Reaction	ELECTROCARDIOGRAM QT PROLONGED	5	13250	4839	0.62067	0.25841	1.49078	0.37531	0.10333	FALSE
4	Reaction	EPSTEIN-BARR VIRUS INFECTION	5	2270	4839	3.6295	1.5099	8.72461	0.01343	0.10333	TRUE
4	Reaction	ERYTHEMA NODOSUM	5	1397	4839	5.90576	2.45535	14.2049	0.00182	0.10333	TRUE
4	Reaction	EYELID PTOSIS	5	4484	4839	1.83541	0.76391	4.40987	0.20621	0.10333	FALSE
4	Reaction	FEELING ABNORMAL	5	113480	4839	0.07245	0.03017	0.17398	0	0.10333	TRUE
4	Reaction	GASTROINTESTINAL INFECTION	5	3456	4839	2.38215	0.99132	5.72433	0.0621	0.10333	FALSE
4	Reaction	GOUT	5	7783	4839	1.05693	0.43999	2.53892	0.81583	0.10333	FALSE
4	Reaction	GRANULOMA	5	1746	4839	4.72189	1.96377	11.3538	0.00467	0.10333	TRUE
4	Reaction	HAEMOLYTIC ANAEMIA	5	4711	4839	1.74688	0.72708	4.19705	0.21921	0.10333	FALSE
4	Reaction	HALLUCINATION	5	30454	4839	0.26999	0.11242	0.64841	0.00041	0.10333	TRUE
4	Reaction	HEARING IMPAIRED	5	6387	4839	1.28812	0.5362	3.09447	0.44859	0.10333	FALSE
4	Reaction	HEPATIC LESION	5	1867	4839	4.41504	1.83631	10.6151	0.00615	0.10333	TRUE
4	Reaction	HEPATITIS CHOLESTATIC	5	2754	4839	2.99047	1.24427	7.18729	0.02792	0.10333	TRUE
4	Reaction	HOT FLUSH	5	28226	4839	0.2913	0.12129	0.69961	0.00143	0.10333	TRUE
4	Reaction	INJECTION SITE REACTION	5	34020	4839	0.24168	0.10063	0.58043	9e-05	0.10333	TRUE
4	Reaction	INTUSSUSCEPTION	5	348	4839	23.9674	9.91689	57.925	0	0.10333	TRUE
4	Reaction	IRITIS	5	1418	4839	5.81799	2.41891	13.9934	0.00194	0.10333	TRUE
4	Reaction	IRRITABILITY	5	32837	4839	0.25039	0.10426	0.60135	0.00017	0.10333	TRUE
4	Reaction	LEUKOENCEPHALOPATHY	5	1984	4839	4.15402	1.72786	9.98686	0.00787	0.10333	TRUE
4	Reaction	LIVER INJURY	5	6166	4839	1.33433	0.55543	3.20551	0.43374	0.10333	FALSE
4	Reaction	LOCALISED OEDEMA	5	2340	4839	3.52069	1.46468	8.46281	0.01511	0.10333	TRUE
4	Reaction	MEMORY IMPAIRMENT	5	56611	4839	0.14523	0.06047	0.34878	0	0.10333	TRUE
4	Reaction	METASTASIS	5	3050	4839	2.69977	1.1234	6.48812	0.04035	0.10333	TRUE
4	Reaction	MUSCULOSKELETAL STIFFNESS	5	33529	4839	0.24522	0.10211	0.58893	0.00013	0.10333	TRUE
4	Reaction	ORTHOSTATIC HYPOTENSION	5	7516	4839	1.0945	0.45563	2.6292	0.8116	0.10333	FALSE
4	Reaction	PAPILLOEDEMA	5	2190	4839	3.76239	1.56512	9.04436	0.01167	0.10333	TRUE
4	Reaction	PAROPHTHALMIA	5	124	4839	69.0825	28.2468	168.953	0	0.10333	TRUE
4	Reaction	PATHOLOGICAL FRACTURE	5	2516	4839	3.27392	1.3621	7.86912	0.01993	0.10333	TRUE
4	Reaction	POSTERIOR REVERSIBLE ENCEPHALOPATHY SYNDROME	5	3078	4839	2.67518	1.11317	6.42896	0.04168	0.10333	TRUE
4	Reaction	PRESYNCOPE	5	10517	4839	0.78204	0.32558	1.87845	0.8412	0.10333	FALSE
4	Reaction	PROCTITIS	5	1044	4839	7.91224	3.2878	19.0412	0.0005	0.10333	TRUE
4	Reaction	PSYCHOTIC DISORDER	5	15442	4839	0.53254	0.22172	1.27906	0.1886	0.10333	FALSE
4	Reaction	RADIATION NECROSIS	5	106	4839	81.3942	33.1742	199.704	0	0.10333	TRUE
4	Reaction	RENAL TUBULAR NECROSIS	5	4312	4839	1.90871	0.7944	4.58606	0.19807	0.10333	FALSE
4	Reaction	RESPIRATORY DISTRESS	5	13758	4839	0.59775	0.24887	1.43571	0.29952	0.10333	FALSE
4	Reaction	RETINOPATHY	5	1768	4839	4.66297	1.93929	11.2119	0.00491	0.10333	TRUE
4	Reaction	RHABDOMYOLYSIS	5	20861	4839	0.39417	0.16412	0.94669	0.02389	0.10333	TRUE
4	Reaction	SHOCK	5	11126	4839	0.73922	0.30776	1.77556	0.69774	0.10333	FALSE
4	Reaction	SPEECH DISORDER	5	25571	4839	0.32155	0.13389	0.77227	0.00463	0.10333	TRUE
4	Reaction	SPINAL CORD COMPRESSION	5	1815	4839	4.54189	1.889	10.9205	0.00548	0.10333	TRUE
4	Reaction	STEVENS-JOHNSON SYNDROME	5	13313	4839	0.61773	0.25719	1.48372	0.37577	0.10333	FALSE
4	Reaction	SUICIDAL IDEATION	5	46607	4839	0.1764	0.07345	0.42365	0	0.10333	TRUE
4	Reaction	TEMPORAL ARTERITIS	5	667	4839	12.4182	5.15397	29.9207	6e-05	0.10333	TRUE
4	Reaction	UNRESPONSIVE TO STIMULI	5	12713	4839	0.6469	0.26933	1.55379	0.46721	0.10333	FALSE
4	Reaction	UROSEPSIS	5	3885	4839	2.11877	0.88178	5.09105	0.09099	0.10333	FALSE
4	Reaction	ABSCESS INTESTINAL	4	1053	4839	6.26945	2.34956	16.7291	0.00419	0.08266	TRUE
4	Reaction	ACIDOSIS	4	3983	4839	1.65284	0.62028	4.4043	0.31433	0.08266	FALSE
4	Reaction	ACNE	4	13731	4839	0.4791	0.17986	1.27621	0.16289	0.08266	FALSE
4	Reaction	ACTIVATED PARTIAL THROMBOPLASTIN TIME PROLONGED	4	3712	4839	1.77364	0.66558	4.72636	0.29636	0.08266	FALSE
4	Reaction	ADRENAL DISORDER	4	796	4839	8.30385	3.11009	22.171	0.00155	0.08266	TRUE
4	Reaction	ANGINA PECTORIS	4	16601	4839	0.39626	0.14876	1.0555	0.05632	0.08266	FALSE
4	Reaction	ARTHROPATHY	4	21035	4839	0.31271	0.1174	0.83295	0.01057	0.08266	TRUE
4	Reaction	ASPIRATION	4	5241	4839	1.2558	0.47133	3.34593	0.56722	0.08266	FALSE
4	Reaction	ASTHMA	4	33594	4839	0.19579	0.07351	0.5215	2e-05	0.08266	TRUE
4	Reaction	Adrenocorticotropic hormone deficiency	4	35	4839	212.15	74.916	600.775	0	0.08266	TRUE
4	Reaction	Autoimmune dermatitis	4	19	4839	438.443	145.567	1320.58	0	0.08266	TRUE
4	Reaction	BLOOD ALBUMIN DECREASED	4	4898	4839	1.34382	0.50435	3.58053	0.55005	0.08266	FALSE
4	Reaction	CROHN'S DISEASE	4	21966	4839	0.29946	0.11242	0.79763	0.00562	0.08266	TRUE
4	Reaction	CYTOMEGALOVIRUS INFECTION	4	5907	4839	1.11412	0.41817	2.96831	0.78709	0.08266	FALSE
4	Reaction	DEMYELINATING POLYNEUROPATHY	4	504	4839	13.1533	4.91929	35.1696	0.00028	0.08266	TRUE
4	Reaction	DYSARTHRIA	4	19129	4839	0.34388	0.1291	0.91597	0.01809	0.08266	TRUE
4	Reaction	Drug reaction with eosinophilia and systemic symptoms	4	6783	4839	0.97015	0.36415	2.58462	1	0.08266	FALSE
4	Reaction	EJECTION FRACTION DECREASED	4	6392	4839	1.02953	0.38643	2.74287	0.79912	0.08266	FALSE
4	Reaction	FLUID RETENTION	4	22568	4839	0.29147	0.10943	0.77635	0.00416	0.08266	TRUE
4	Reaction	Fulminant type 1 diabetes mellitus	4	67	4839	104.391	38.0122	286.685	0	0.08266	TRUE
4	Reaction	GASTRIC ULCER HAEMORRHAGE	4	3246	4839	2.02858	0.7612	5.40613	0.13795	0.08266	FALSE
4	Reaction	HAEMATOCRIT DECREASED	4	12336	4839	0.5333	0.2002	1.4206	0.2693	0.08266	FALSE
4	Reaction	HAEMODIALYSIS	4	7742	4839	0.84992	0.31903	2.26422	1	0.08266	FALSE
[truncated: 1,192 more rows]

## Sheet: Cohort 5
COHORT	CONCEPT	NAME	CONCEPT_AES_IN_COHORT	CONCEPT_CASE_COUNT	COHORT_SIZE	PRR	PRR_95CI(-)	PRR_95CI(+)	P-value Fisher Exact Test (two tailed)	COHORT_%COVERAGE	Significant_FisherExactTest
[truncated: 967 more rows]

[truncated: 4 more sheets: Cohort 6, Cohort 7, Cohort 8, Outcome analysis]
